# Supplementary material
Source: publisher figshare collection journal article supplement (https://acs.figshare.com/ndownloader/files/3719554)
Supplement: Supplementary file 1 [file 3719554]

## Sheet: Metabolite prediction
	Metabolites from the predicted aerobic transformation of gemfibrozil (based upon the EAWAG BBD/PPS, proteomics data and metabolomic data). All predicted upper pathways for gemfibrozil can be seen in Fig. S1.
	Gemfibrozil
	Smiles annotation	O=C(O)C(C)(C)CCCOc1cc(ccc1C)C
	Metabolite			Aerobic likelihood	Rule	Rule description						IUPAC name
2				Neutral	bt00036	aromatic Methyl -> primary Alcohol						5-[2-(hydroxymethyl)phenoxy]-2,2-dimethylpentanoic acid
3				Likely	bt0001	primary Alcohol -> Aldehyde						5-(2-formylphenoxy)-2,2-dimethylpentanoic acid
4				Likely	bt0003	Aldehyde -> Carboxylate						2-[(4-carboxy-4-methylpentyl)oxy]benzoic acid
5b				Neutral	bt0023	dialiphatic Ether -> Alcohol + Aldehyde						2,2-dimethyl-5-oxopentanoic acid
						aromatic-aliphatic Ether -> Phenol derivative + Aldehyde
5a				Neutral	bt0023	dialiphatic Ether -> Alcohol + Aldehyde						2-hydroxy-4-methylbenzoic acid
						aromatic-aliphatic Ether -> Phenol derivative + Aldehyde
6a				Likely	bt0060	vic-Hydroxycarboxyaromatic -> Catechol derivative						4-methylbenzene-1,2-diol
						vic-Aminocarboxyaromatic -> Catechol derivative
7a				Likely	bt0351	vic-Dihydroxybenzenoid -> 2-Oxopent-4-enoate derivative + Carboxylate						4-methyl-2-oxopent-4-enoic acid
						1-Amino-2-hydroxybenzenoid -> 2-Amino-2,4-dienoate derivate + Carboxylate
3*				Neutral	bt0242	secondary Aliphatic -> secondary Alcohol						2-[(4-carboxy-2-hydroxy-4-methylpentyl)oxy]-4-methylbenzoic acid
6b				Neutral	bt0023	dialiphatic Ether -> Alcohol + Aldehyde						4-hydroxy-2,2-dimethyl-5-oxopentanoic acid
						aromatic-aliphatic Ether -> Phenol derivative + Aldehyde

## Sheet: Figure S4 data
Output from BINGO following enrichment analysis of differentially underexpressed proteins in response to gemfibrozil.
File created with bingo (c) on 05-10-2015 at 09:12:31
ontology: namespace
curator: bingo
Selected ontology file : bundle://100.0:1/data/GO_Biological_Process
Selected annotation file : C:\Users\Henrik\Desktop\GAF.txt
Discarded evidence codes :
Overrepresentation
Selected statistical test : Hypergeometric test
Selected correction : Benjamini & Hochberg False Discovery Rate (FDR) correction
Selected significance level : 0.05
Testing option : Use whole annotation as reference set
The selected cluster :
BGED01242	BGED03189	BGED03188	BGED03386	BGED01283	BGED02372	BGED00993	BGED02653	BGED00396	BGED03389	BGED01320	BGED02299	BGED03421	BGED00917	BGED00914	BGED00435	BGED00634	BGED01568	BGED02019	BGED02657	BGED00950	BGED02414	BGED00439	BGED00956	BGED00437	BGED01352	BGED02243	BGED02687	BGED01399	BGED00660	BGED01156	BGED01391	BGED03294	BGED00947	BGED00948	BGED00347	BGED01357	BGED02369	BGED02567	BGED00901	BGED01837	BGED00946	BGED00943	BGED02397	BGED00450	BGED00491	BGED02351	BGED00294	BGED00332	BGED00453
No annotations were retrieved for the following entities:
BGED03189	BGED02397	BGED03188	BGED03386	BGED02351	BGED00993	BGED02653	BGED03389	BGED02299	BGED00917	BGED00853	BGED02657	BGED02414	BGED00736	BGED02386	BGED02385	BGED03397	BGED00660	BGED02300	BGED02740	BGED03390	BGED03294	BGED00347	BGED02304	BGED02941	BGED00943
GO-ID	p-value	corr p-value	x	n	X	N	Description	Genes in test set
6412	5.1073e-08	1.7161e-05	17	98	69	1792	translation	BGED02243|BGED00450|BGED02372|BGED00453|BGED00443|BGED00440|BGED00452|BGED00435|BGED00006|BGED00447|BGED00004|BGED00456|BGED00445|BGED00439|BGED00437|BGED00459|BGED00448
44267	2.4224e-07	4.0697e-05	20	149	69	1792	cellular protein metabolic process	BGED02243|BGED00450|BGED02372|BGED00453|BGED00443|BGED00440|BGED01320|BGED00452|BGED00947|BGED00435|BGED00006|BGED00447|BGED00004|BGED02567|BGED00456|BGED00445|BGED00439|BGED00437|BGED00459|BGED00448
19538	4.7483e-07	5.3181e-05	20	155	69	1792	protein metabolic process	BGED02243|BGED00450|BGED02372|BGED00453|BGED00443|BGED00440|BGED01320|BGED00452|BGED00947|BGED00435|BGED00006|BGED00447|BGED00004|BGED02567|BGED00456|BGED00445|BGED00439|BGED00437|BGED00459|BGED00448
10467	8.4457e-06	0.00070944	31	387	69	1792	gene expression	BGED01242|BGED00450|BGED00491|BGED02372|BGED00294|BGED00332|BGED00453|BGED00396|BGED00298|BGED00331|BGED00452|BGED01024|BGED00435|BGED01305|BGED00456|BGED00973|BGED00439|BGED00437|BGED00459|BGED00977|BGED02243|BGED00362|BGED00443|BGED00440|BGED01254|BGED00006|BGED00447|BGED00004|BGED02369|BGED00445|BGED00448
34645	0.00014599	0.0098105	30	421	69	1792	cellular macromolecule biosynthetic process	BGED01242|BGED00450|BGED00491|BGED02372|BGED00294|BGED00332|BGED00453|BGED00396|BGED00298|BGED00331|BGED00452|BGED00435|BGED00456|BGED00973|BGED00439|BGED00437|BGED00459|BGED00977|BGED02243|BGED00362|BGED00443|BGED00440|BGED01156|BGED01254|BGED00006|BGED00447|BGED00004|BGED02369|BGED00445|BGED00448
9059	0.00027562	0.015435	30	435	69	1792	macromolecule biosynthetic process	BGED01242|BGED00450|BGED00491|BGED02372|BGED00294|BGED00332|BGED00453|BGED00396|BGED00298|BGED00331|BGED00452|BGED00435|BGED00456|BGED00973|BGED00439|BGED00437|BGED00459|BGED00977|BGED02243|BGED00362|BGED00443|BGED00440|BGED01156|BGED01254|BGED00006|BGED00447|BGED00004|BGED02369|BGED00445|BGED00448
44260	0.00051005	0.024482	38	634	69	1792	cellular macromolecule metabolic process	BGED01242|BGED00450|BGED00491|BGED02372|BGED00294|BGED00332|BGED00453|BGED00179|BGED00396|BGED01320|BGED00298|BGED00331|BGED00452|BGED01024|BGED00435|BGED01305|BGED00214|BGED00456|BGED00973|BGED00439|BGED00437|BGED00459|BGED00977|BGED02243|BGED00362|BGED02341|BGED00443|BGED00440|BGED01156|BGED01254|BGED00947|BGED00006|BGED00447|BGED00004|BGED02369|BGED02567|BGED00445|BGED00448
[truncated: 45 more columns]

## Sheet: Figure S3 data
Output from BINGO following enrichment analysis of differentially overexpressed proteins in response to gemfibrozil.
File created with bingo (c) on 02-10-2015 at 13:10:13
ontology: namespace
curator: bingo
Selected ontology file : bundle://104.0:1/data/GO_Biological_Process
Selected annotation file : C:\Users\Henrik\Desktop\GAF.txt
Discarded evidence codes :
Overrepresentation
Selected statistical test : Hypergeometric test
Selected correction : Benjamini & Hochberg False Discovery Rate (FDR) correction
Selected significance level : 0.05
Testing option : Use whole annotation as reference set
The selected cluster :
BGED03100	BGED02251	BGED02016	BGED02258	BGED03226	BGED02014	BGED03224	BGED02013	BGED02497	BGED02250	BGED00190	BGED00519	BGED02938	BGED00512	BGED01723	BGED01844	BGED03109	BGED03229	BGED00510	BGED00631	BGED00994	BGED00995	BGED02017	BGED02138	BGED03227	BGED03348	BGED00516	BGED02937	BGED00638	BGED00759	BGED01605	BGED02936	BGED00515	BGED00999	BGED02934	BGED00185	BGED00186	BGED02000	BGED01950	BGED02247	BGED00982	BGED00187	BGED02003	BGED00188	BGED02365	BGED02481	BGED00509	BGED02009	BGED00623	BGED00744
BGED00783	BGED01510	BGED01994	BGED00781	BGED00782	BGED02288	BGED01193	BGED01191	BGED00787	BGED00788	BGED01997	BGED00543	BGED00544	BGED01874	BGED00305	BGED02155	BGED03123	BGED01186	BGED02275	BGED02274	BGED02273	BGED00893	BGED02159	BGED03127	BGED01740	BGED02279	BGED03247	BGED00099	BGED01188	BGED02277	BGED02151	BGED02393	BGED00094	BGED00413	BGED01503	BGED01866	BGED01502	BGED01744	BGED00895	BGED01743	BGED00412	BGED00417	BGED00536	BGED01505	BGED00416	BGED03112	BGED02262	BGED00762	BGED01059	BGED01178
No annotations were retrieved for the following entities:
BGED03100	BGED03187	BGED03226	BGED01686	BGED02533	BGED02014	BGED03224	BGED00594	BGED02773	BGED02013	BGED02497	BGED02091	BGED00190	BGED02094	BGED02093	BGED02938	BGED01723	BGED01844	BGED03109	BGED02416	BGED03229	BGED02415	BGED00510	BGED01688	BGED02535	BGED03227	BGED03348	BGED02534	BGED02937	BGED02936	BGED01449	BGED00185	BGED01550	BGED01950	BGED01433	BGED00223	BGED00465	BGED01432	BGED02003	BGED00462	BGED03293	BGED02009	BGED00623	BGED03218	BGED00621	BGED03458	BGED02402	BGED00506	BGED01955	BGED02923
GO-ID	p-value	corr p-value	x	n	X	N	Description	Genes in test set
44281	5.2332e-16	3.5219e-13	103	472	200	1792	small molecule metabolic process	BGED02251|BGED00591|BGED02016|BGED02258|BGED02250|BGED00512|BGED01327|BGED00631|BGED00994|BGED00995|BGED02017|BGED00516|BGED00638|BGED01605|BGED00515|BGED02934|BGED02000|BGED00101|BGED00982|BGED00187|BGED00188|BGED02365|BGED01832|BGED02248|BGED00503|BGED00745|BGED02593|BGED00693|BGED02596|BGED00619|BGED00615|BGED00614|BGED02187|BGED02065|BGED02186|BGED00609|BGED00606|BGED00607|BGED01016|BGED00686…
6082	2.2015e-12	4.8572e-10	67	270	200	1792	organic acid metabolic process	BGED00790|BGED00591|BGED02295|BGED02016|BGED02258|BGED01327|BGED00631|BGED00994|BGED00995|BGED02017|BGED00555|BGED00714|BGED00638|BGED00515|BGED02934|BGED01594|BGED02000|BGED01592|BGED00541|BGED00783|BGED01994|BGED00982|BGED00187|BGED01475|BGED00781|BGED00188|BGED02365|BGED02563|BGED00782|BGED01191|BGED00787|BGED01832|BGED00788|BGED01997|BGED02248|BGED00148|BGED00503|BGED01582|BGED02275|BGED02593…
19752	2.8869e-12	4.8572e-10	66	265	200	1792	carboxylic acid metabolic process	BGED00790|BGED00591|BGED02295|BGED02016|BGED02258|BGED01327|BGED00631|BGED00995|BGED02017|BGED00555|BGED00714|BGED00638|BGED00515|BGED02934|BGED01594|BGED02000|BGED01592|BGED00541|BGED00783|BGED01994|BGED00982|BGED00187|BGED01475|BGED00781|BGED00188|BGED02365|BGED02563|BGED00782|BGED01191|BGED00787|BGED01832|BGED00788|BGED01997|BGED02248|BGED00148|BGED00503|BGED01582|BGED02275|BGED02593|BGED02274…
43436	2.8869e-12	4.8572e-10	66	265	200	1792	oxoacid metabolic process	BGED00790|BGED00591|BGED02295|BGED02016|BGED02258|BGED01327|BGED00631|BGED00995|BGED02017|BGED00555|BGED00714|BGED00638|BGED00515|BGED02934|BGED01594|BGED02000|BGED01592|BGED00541|BGED00783|BGED01994|BGED00982|BGED00187|BGED01475|BGED00781|BGED00188|BGED02365|BGED02563|BGED00782|BGED01191|BGED00787|BGED01832|BGED00788|BGED01997|BGED02248|BGED00148|BGED00503|BGED01582|BGED02275|BGED02593|BGED02274…
42180	1.215e-11	1.0522e-09	67	279	200	1792	cellular ketone metabolic process	BGED00790|BGED02251|BGED00591|BGED02295|BGED02016|BGED02258|BGED01327|BGED00631|BGED00995|BGED02017|BGED00555|BGED00714|BGED00638|BGED00515|BGED02934|BGED01594|BGED02000|BGED01592|BGED00541|BGED00783|BGED01994|BGED00982|BGED00187|BGED01475|BGED00781|BGED00188|BGED02365|BGED02563|BGED00782|BGED01191|BGED00787|BGED01832|BGED00788|BGED01997|BGED02248|BGED00148|BGED00503|BGED01582|BGED02275|BGED02593…
43038	1.2507e-11	1.0522e-09	20	34	200	1792	amino acid activation	BGED02187|BGED02275|BGED02593|BGED02186|BGED02274|BGED02295|BGED02273|BGED00783|BGED00187|BGED00781|BGED00188|BGED02365|BGED02596|BGED00782|BGED00787|BGED00007|BGED00788|BGED00148|BGED00005|BGED00008
43039	1.2507e-11	1.0522e-09	20	34	200	1792	tRNA aminoacylation	BGED02187|BGED02275|BGED02593|BGED02186|BGED02274|BGED02295|BGED02273|BGED00783|BGED00187|BGED00781|BGED00188|BGED02365|BGED02596|BGED00782|BGED00787|BGED00007|BGED00788|BGED00148|BGED00005|BGED00008
6418	1.2507e-11	1.0522e-09	20	34	200	1792	tRNA aminoacylation for protein translation	BGED02187|BGED02275|BGED02593|BGED02186|BGED02274|BGED02295|BGED02273|BGED00783|BGED00187|BGED00781|BGED00188|BGED02365|BGED02596|BGED00782|BGED00787|BGED00007|BGED00788|BGED00148|BGED00005|BGED00008
6399	2.0801e-11	1.5555e-09	26	57	200	1792	tRNA metabolic process	BGED02275|BGED02593|BGED02274|BGED02295|BGED02273|BGED02610|BGED01684|BGED02596|BGED02193|BGED00186|BGED02187|BGED02186|BGED00783|BGED01510|BGED00187|BGED00781|BGED00188|BGED02365|BGED00782|BGED02481|BGED00787|BGED00007|BGED00788|BGED00148|BGED00005|BGED00008
34660	2.8137e-10	1.8936e-08	27	67	200	1792	ncRNA metabolic process	BGED00010|BGED02275|BGED02593|BGED02274|BGED02295|BGED02273|BGED02610|BGED01684|BGED02596|BGED02193|BGED00186|BGED02187|BGED02186|BGED00783|BGED01510|BGED00187|BGED00781|BGED00188|BGED02365|BGED00782|BGED02481|BGED00787|BGED00007|BGED00788|BGED00148|BGED00005|BGED00008
6520	1.2661e-09	7.7464e-08	50	196	200	1792	cellular amino acid metabolic process	BGED00790|BGED02295|BGED02016|BGED01327|BGED00631|BGED02017|BGED00555|BGED00714|BGED00638|BGED00515|BGED01594|BGED01592|BGED00541|BGED00783|BGED00187|BGED01475|BGED00781|BGED00188|BGED02365|BGED02563|BGED00782|BGED01191|BGED00787|BGED00788|BGED02248|BGED00148|BGED00503|BGED01582|BGED02275|BGED02593|BGED02274|BGED02273|BGED02596|BGED00094|BGED00619|BGED01502|BGED01589|BGED00536|BGED01330|BGED02187…
6519	6.6487e-09	3.7288e-07	51	211	200	1792	cellular amino acid and derivative metabolic process	BGED00790|BGED02295|BGED02016|BGED01327|BGED00631|BGED02017|BGED00555|BGED00714|BGED00638|BGED00515|BGED01594|BGED01592|BGED00541|BGED00783|BGED00187|BGED01475|BGED00781|BGED00188|BGED02365|BGED02563|BGED00782|BGED01191|BGED00787|BGED00788|BGED02248|BGED00148|BGED00503|BGED01582|BGED02275|BGED02593|BGED02274|BGED02273|BGED02596|BGED00094|BGED00619|BGED01502|BGED01589|BGED00536|BGED01330|BGED02187…
44106	8.4169e-09	4.3573e-07	50	206	200	1792	cellular amine metabolic process	BGED00790|BGED02295|BGED02016|BGED01327|BGED00631|BGED02017|BGED00555|BGED00714|BGED00638|BGED00515|BGED01594|BGED01592|BGED00541|BGED00783|BGED00187|BGED01475|BGED00781|BGED00188|BGED02365|BGED02563|BGED00782|BGED01191|BGED00787|BGED00788|BGED02248|BGED00148|BGED00503|BGED01582|BGED02275|BGED02593|BGED02274|BGED02273|BGED02596|BGED00094|BGED00619|BGED01502|BGED01589|BGED00536|BGED01330|BGED02187…
44237	3.1041e-08	1.4922e-06	160	1129	200	1792	cellular metabolic process	BGED02251|BGED00591|BGED02016|BGED02258|BGED01684|BGED02250|BGED00512|BGED01327|BGED00631|BGED00994|BGED00995|BGED02017|BGED00236|BGED00516|BGED00638|BGED00759|BGED01605|BGED00515|BGED00999|BGED02934|BGED00186|BGED02000|BGED02247|BGED00101|BGED00982|BGED00187|BGED00188|BGED02365|BGED02481|BGED02647|BGED00744|BGED01832|BGED00224|BGED02248|BGED00989|BGED00503|BGED00745|BGED00228|BGED00229|BGED02593…
8152	4.3389e-07	1.9467e-05	172	1287	200	1792	metabolic process	BGED02251|BGED00591|BGED02016|BGED02258|BGED01684|BGED02250|BGED00512|BGED01327|BGED00631|BGED00994|BGED00995|BGED02017|BGED00236|BGED00516|BGED00638|BGED00759|BGED01605|BGED00515|BGED00999|BGED02934|BGED00186|BGED02000|BGED00582|BGED02247|BGED00101|BGED00982|BGED00187|BGED00188|BGED02365|BGED02481|BGED02647|BGED00744|BGED01832|BGED00224|BGED02248|BGED00989|BGED00503|BGED00745|BGED00228|BGED00229…
9987	6.2635e-06	0.00026346	176	1363	200	1792	cellular process	BGED02251|BGED00591|BGED02016|BGED02258|BGED01684|BGED02250|BGED00512|BGED01327|BGED00631|BGED00994|BGED00995|BGED02017|BGED02138|BGED00236|BGED00516|BGED00638|BGED00759|BGED01605|BGED00515|BGED00999|BGED02934|BGED00186|BGED02000|BGED00582|BGED02247|BGED00101|BGED00982|BGED00187|BGED00188|BGED02365|BGED02481|BGED00509|BGED02647|BGED00744|BGED01832|BGED02008|BGED00224|BGED02248|BGED00626|BGED00989…
9308	1.1469e-05	0.00045403	52	269	200	1792	amine metabolic process	BGED00790|BGED02295|BGED02016|BGED01327|BGED00631|BGED02017|BGED00555|BGED00714|BGED00638|BGED00515|BGED01594|BGED01592|BGED00541|BGED00783|BGED00187|BGED01475|BGED00781|BGED00188|BGED02365|BGED02563|BGED00782|BGED01191|BGED00787|BGED00788|BGED02248|BGED00148|BGED00503|BGED01582|BGED02275|BGED02593|BGED02274|BGED02273|BGED02596|BGED00094|BGED00619|BGED01502|BGED01589|BGED00536|BGED01330|BGED02187…
44238	9.0055e-05	0.003367	148	1109	200	1792	primary metabolic process	BGED00591|BGED02016|BGED02258|BGED01684|BGED02250|BGED00512|BGED01327|BGED00631|BGED00994|BGED00995|BGED02017|BGED00236|BGED00516|BGED00638|BGED00515|BGED00999|BGED00186|BGED00582|BGED02247|BGED00101|BGED00982|BGED00187|BGED00188|BGED02365|BGED02481|BGED00744|BGED01832|BGED00224|BGED02248|BGED00989|BGED00503|BGED00745|BGED00228|BGED00229|BGED02593|BGED02350|BGED00454|BGED00693|BGED02596|BGED02193…
6066	0.00019739	0.0069917	21	84	200	1792	alcohol metabolic process	BGED01186|BGED00250|BGED02444|BGED00135|BGED02443|BGED00693|BGED01178|BGED02420|BGED00644|BGED01832|BGED00920|BGED01016|BGED01005|BGED00136|BGED00686|BGED00676|BGED01874|BGED00615|BGED00604|BGED00602|BGED00614
34641	0.00024089	0.0081059	114	809	200	1792	cellular nitrogen compound metabolic process	BGED02016|BGED01684|BGED02250|BGED00512|BGED01327|BGED00631|BGED02017|BGED00236|BGED00516|BGED00638|BGED01605|BGED00515|BGED00999|BGED00186|BGED02247|BGED00101|BGED00187|BGED00188|BGED02365|BGED02481|BGED00744|BGED00224|BGED02248|BGED00503|BGED00745|BGED00228|BGED00229|BGED02593|BGED02350|BGED02596|BGED02193|BGED00619|BGED00213|BGED02187|BGED02065|BGED02186|BGED00162|BGED00167|BGED00168|BGED00609…
6260	0.00039734	0.012734	12	37	200	1792	DNA replication	BGED00162|BGED00744|BGED02338|BGED00249|BGED00246|BGED00224|BGED02336|BGED02325|BGED00247|BGED00490|BGED00745|BGED00228
6091	0.00050607	0.015481	15	54	200	1792	generation of precursor metabolites and energy	BGED02258|BGED02444|BGED00014|BGED00135|BGED00564|BGED02443|BGED01178|BGED01188|BGED01193|BGED01191|BGED01005|BGED00686|BGED00676|BGED01874|BGED00602
44262	0.00058847	0.017219	23	103	200	1792	cellular carbohydrate metabolic process	BGED01186|BGED00250|BGED02258|BGED00982|BGED02444|BGED00135|BGED02443|BGED00693|BGED01178|BGED00644|BGED01832|BGED00920|BGED00994|BGED01016|BGED01005|BGED00686|BGED00676|BGED01874|BGED00989|BGED00615|BGED00604|BGED00602|BGED00614
6006	0.0011275	0.031617	12	41	200	1792	glucose metabolic process	BGED00250|BGED02444|BGED00135|BGED02443|BGED00693|BGED01178|BGED01005|BGED00686|BGED00676|BGED01874|BGED00604|BGED00602
15980	0.001286	0.034296	9	26	200	1792	energy derivation by oxidation of organic compounds	BGED02258|BGED00014|BGED00564|BGED01178|BGED00686|BGED00676|BGED01874|BGED01193|BGED01191
302	0.0013717	0.034296	3	3	200	1792	response to reactive oxygen species	BGED00165|BGED02436|BGED00759
19318	0.0014259	0.034296	12	42	200	1792	hexose metabolic process	BGED00250|BGED02444|BGED00135|BGED02443|BGED00693|BGED01178|BGED01005|BGED00686|BGED00676|BGED01874|BGED00604|BGED00602
6261	0.0014269	0.034296	5	9	200	1792	DNA-dependent DNA replication	BGED00162|BGED02338|BGED00249|BGED00224|BGED00247
6396	0.0017868	0.040659	12	43	200	1792	RNA processing	BGED00186|BGED00010|BGED00673|BGED02610|BGED01510|BGED00157|BGED01684|BGED00413|BGED00412|BGED02481|BGED00008|BGED02193
6412	0.0018124	0.040659	21	98	200	1792	translation	BGED02187|BGED02275|BGED02593|BGED02186|BGED02274|BGED02295|BGED02273|BGED00783|BGED00454|BGED00187|BGED00781|BGED00188|BGED02365|BGED02596|BGED00782|BGED00787|BGED00007|BGED00788|BGED00148|BGED00005|BGED00008
44283	0.0020314	0.0441	44	263	200	1792	small molecule biosynthetic process	BGED00153|BGED02251|BGED00250|BGED00693|BGED02250|BGED00094|BGED00512|BGED01348|BGED00631|BGED00994|BGED01347|BGED01589|BGED00995|BGED00555|BGED00516|BGED00714|BGED00638|BGED01605|BGED00536|BGED00515|BGED01594|BGED01592|BGED02065|BGED00101|BGED00541|BGED01510|BGED00982|BGED00762|BGED00143|BGED01475|BGED00144|BGED02563|BGED00606|BGED00607|BGED01832|BGED00788|BGED01016|BGED02546|BGED02248|BGED01335…
32787	0.0023517	0.049459	16	68	200	1792	monocarboxylic acid metabolic process	BGED02065|BGED00250|BGED00591|BGED02258|BGED01994|BGED00982|BGED00693|BGED00094|BGED01832|BGED01348|BGED00920|BGED01997|BGED01347|BGED02678|BGED00995|BGED02934
[truncated: 205 more columns]

## Sheet: Full protein lists
																																														Full protein lists containing identification and quantification from the individual replicates.
													-1	-2	-3	-4	-5	1	2	3	4	5				t-test Significant	Q-value	Score	Intensity	MS/MS Count	Peptide counts (unique)	Unique peptides	Razor + unique peptides	Sequence lengths	Sequence length	Mol. weight [kDa]	Unique sequence coverage [%]	#NAME?	t-test Difference	Test statistic	Protein IDs	Majority protein IDs	Fasta headers				Fasta headers
													#!{Description}																											This is the test statistic taking into account the effect of s0.
									1.30103				#!{Type}E	E	E	E	E	E	E	E	E	E				C	N	N	N	N	N	N	N	N	N	N	N	N	N	N	T	T	T				T
								+/-	p-value (log10)				#!{C:Group}-	-	-	-	-	+	+	+	+	+	-	+	+/-
	N1LJV0	#REF!	bged01690	Ferrous iron transport protein B	EBGED10_15270	K04759		3.72699	3.6037	0.000249056		+	NaN	-3.13337	-3.01523	NaN	-1.96463	0.6208	0.582689	0.536028	1.28347	2.0899	-2.70441	1.02258	3.72699	+	0	53.834	776070000	39	6	6	6	466	466	51.719	12	3.6037	-3.72699	-7.71297	N1LJV0	N1LJV0	>tr|N1LJV0|N1LJV0_9BACI Ferrous iron transport protein B OS=Bacillus sp. GeD10 GN=EBGED10_15270 PE=4 SV=1	N1LJV0		Ferrous iron transport protein B	>tr|N1LJV0|N1LJV0_9BACI Ferrous iron transport protein B OS=Bacillus sp. GeD10	EBGED10_15270
	N1LHK1	#REF!	bged00564	AA3-600 quinol oxidase subunit I	EBGED10_15380	K02827		3.70286	2.6236	0.00237904		+	-3.11055	-3.4036	-2.74096	NaN	NaN	-0.26127	-0.25245	-0.287174	1.90758	1.98243	-3.08504	0.617821	3.70286	+	0	40.09	761960000	46	8	8	8	644	644	72.73	12	2.6236	-3.70286	-5.03054	N1LHK1	N1LHK1	>tr|N1LHK1|N1LHK1_9BACI AA3-600 quinol oxidase subunit I OS=Bacillus sp. GeD10 GN=EBGED10_15380 PE=3 SV=1	N1LHK1		AA3-600 quinol oxidase subunit I	>tr|N1LHK1|N1LHK1_9BACI AA3-600 quinol oxidase subunit I OS=Bacillus sp. GeD10	EBGED10_15380
	N1LKZ3	#REF!	bged03218	MutT/nudix family protein	EBGED10_2860	K03574		3.27758	2.08508	0.00822096		+	-3.67826	NaN	NaN	NaN	-2.99497	-0.636008	-0.94328	NaN	0.680198	0.662933	-3.33662	-0.0590395	3.27758	+	0	91.791	486910000	16	4	4	4	153	153	17.537	32.7	2.08508	-3.27758	-4.86979	N1LKZ3	N1LKZ3	>tr|N1LKZ3|N1LKZ3_9BACI MutT/nudix family protein OS=Bacillus sp. GeD10 GN=EBGED10_2860 PE=3 SV=1	N1LKZ3		MutT/nudix family protein	>tr|N1LKZ3|N1LKZ3_9BACI MutT/nudix family protein OS=Bacillus sp. GeD10	EBGED10_2860
	N1LR96	#REF!	#N/A	Oxidoreductase, aldo/keto reductase family	EBGED10_39810	K00100		3.19098	2.6718	0.00212914		+	-4.77299	-4.36585	NaN	-3.95961	-2.71429	NaN	-1.10638	-0.468569	-0.711653	NaN	-3.95319	-0.762201	3.19098	+	0	89.527	557100000	13	6	6	6	300	300	34.054	39.7	2.6718	-3.19098	-5.81117	N1LR96	N1LR96	>tr|N1LR96|N1LR96_9BACI Oxidoreductase, aldo/keto reductase family OS=Bacillus sp. GeD10 GN=EBGED10_39810 PE=4 SV=1	N1LR96		Oxidoreductase, aldo/keto reductase family	>tr|N1LR96|N1LR96_9BACI Oxidoreductase, aldo/keto reductase family OS=Bacillus sp. GeD10	EBGED10_39810
	N1LS84	#REF!	bged02934	Formate dehydrogenase related protein	EBGED10_42190	K00123		3.12149	6.15182	7.04992e-07		+	-1.73668	-1.6912	-1.5875	-1.66363	-1.38072	0.772066	1.35007	1.55494	1.93908	1.93159	-1.61195	1.50955	3.12149	+	0	215.99	1331300000	86	NaN	20	20	NaN	978	109.04	34.3	6.15182	-3.12149	-13.8729	N1LS84;N1LMG9	N1LS84	>tr|N1LS84|N1LS84_9BACI Formate dehydrogenase related protein OS=Bacillus sp. GeD10 GN=EBGED10_42190 PE=4 SV=1	N1LS84		Formate dehydrogenase related protein	>tr|N1LS84|N1LS84_9BACI Formate dehydrogenase related protein OS=Bacillus sp. GeD10	EBGED10_42190
	N1LSV9	#REF!	bged00604	Glucose-6-phosphate 1-dehydrogenase	zwf	K00036		2.95371	2.52058	0.00301593		+	-4.04214	-4.03705	-2.99064	-1.59253	NaN	NaN	0.345825	-0.489834	-0.136104	-0.567384	-3.16559	-0.211874	2.95371	+	0	110.89	594350000	33	4	4	4	494	494	57.222	11.1	2.52058	-2.95371	-4.79507	N1LSV9	N1LSV9	>tr|N1LSV9|N1LSV9_9BACI Glucose-6-phosphate 1-dehydrogenase OS=Bacillus sp. GeD10 GN=zwf PE=3 SV=1	N1LSV9		Glucose-6-phosphate 1-dehydrogenase	>tr|N1LSV9|N1LSV9_9BACI Glucose-6-phosphate 1-dehydrogenase OS=Bacillus sp. GeD10	zwf
	N1LVF6	#REF!	bged01039	Oligopeptide transport system permease protein OppC (TC 3.A.1.5.1)	EBGED10_59350	K15582		2.82214	3.72166	0.000189817		+	-0.847086	-1.22376	-0.186204	-0.311246	-0.0430102	1.53763	2.23825	1.48286	2.80665	3.43401	-0.522262	2.29988	2.82214	+	0	323.31	2967900000	105	15	15	15	338	338	37.859	34.6	3.72166	-2.82214	-6.4914	N1LVF6	N1LVF6	>tr|N1LVF6|N1LVF6_9BACI Oligopeptide transport system permease protein OppC (TC 3.A.1.5.1) OS=Bacillus sp. GeD10 GN=EBGED10_59350 PE=3 SV=1	N1LVF6		Oligopeptide transport system permease protein OppC (TC 3.A.1.5.1)	>tr|N1LVF6|N1LVF6_9BACI Oligopeptide transport system permease protein OppC (TC 3.A.1.5.1) OS=Bacillus sp. GeD10	EBGED10_59350
N1LR65	N1LR65	#N/A	#N/A	Uncharacterized protein	EBGED10_44200	#N/A		2.80355	1.97972	0.0104781		+	NaN	-3.91483	NaN	-2.99259	-2.76338	NaN	NaN	NaN	-0.659358	-0.180746	-3.2236	-0.420052	2.80355	+	0	9.566	149880000	12	3	3	3	417	417	47.595	15.6	1.97972	-2.80355	-5.74437	N1LR65	N1LR65	>tr|N1LR65|N1LR65_9BACI Uncharacterized protein OS=Bacillus sp. GeD10 GN=EBGED10_44200 PE=4 SV=1	N1LR65		Uncharacterized protein	>tr|N1LR65|N1LR65_9BACI Uncharacterized protein OS=Bacillus sp. GeD10	EBGED10_44200
	N1LXC8	#REF!	bged01059	Oligopeptide transport system permease protein OppB (TC 3.A.1.5.1)	EBGED10_59340	K15581		2.78814	4.00431	9.90133e-05		+	-1.91455	-1.95253	-1.30543	-1.47541	-0.77415	0.972487	0.331778	1.16614	1.96825	2.07999	-1.48441	1.30373	2.78814	+	0	57.857	1496500000	60	5	5	5	309	309	33.901	20.1	4.00431	-2.78814	-7.13007	N1LXC8	N1LXC8	>tr|N1LXC8|N1LXC8_9BACI Oligopeptide transport system permease protein OppB (TC 3.A.1.5.1) OS=Bacillus sp. GeD10 GN=EBGED10_59340 PE=3 SV=1	N1LXC8		Oligopeptide transport system permease protein OppB (TC 3.A.1.5.1)	>tr|N1LXC8|N1LXC8_9BACI Oligopeptide transport system permease protein OppB (TC 3.A.1.5.1) OS=Bacillus sp. GeD10	EBGED10_59340
N1LJ73	N1LJ73	#N/A	#N/A	Uncharacterized protein	EBGED10_20830	#N/A		2.67621	2.66446	0.00216539		+	-3.34322	NaN	-5.67172	-4.05157	-4.32135	-2.13497	-2.34151	-2.12385	-0.989217	-0.764204	-4.34696	-1.67075	2.67621	+	0	82.901	275130000	24	8	8	8	168	168	19.673	54.8	2.66446	-2.67621	-4.71689	N1LJ73	N1LJ73	>tr|N1LJ73|N1LJ73_9BACI Uncharacterized protein OS=Bacillus sp. GeD10 GN=EBGED10_20830 PE=4 SV=1	N1LJ73		Uncharacterized protein	>tr|N1LJ73|N1LJ73_9BACI Uncharacterized protein OS=Bacillus sp. GeD10	EBGED10_20830
	N1LTQ8	#REF!	bged00765	Transketolase	EBGED10_30680	K00615		2.59203	2.54335	0.00286186		+	-0.994679	-1.10132	-0.723655	-0.886477	-0.587023	-0.417178	1.43394	2.68814	1.94144	3.02064	-0.858631	1.7334	2.59203	+	0	323.31	2563900000	128	19	19	19	664	664	72.151	45.3	2.54335	-2.59203	-4.23371	N1LTQ8	N1LTQ8	>tr|N1LTQ8|N1LTQ8_9BACI Transketolase OS=Bacillus sp. GeD10 GN=EBGED10_30680 PE=3 SV=1	N1LTQ8		Transketolase	>tr|N1LTQ8|N1LTQ8_9BACI Transketolase OS=Bacillus sp. GeD10	EBGED10_30680
	N1LJ78	#REF!	bged01691	Ferrous iron transport protein B	EBGED10_20880	K04759		2.59112	2.76025	0.00173682		+	-4.16356	-2.52261	-1.98966	-2.93314	-2.59039	-1.57486	0.0419759	-0.837082	0.272105	0.854082	-2.83987	-0.248755	2.59112	+	0	80.423	402090000	39	13	13	13	662	662	73.091	26.1	2.76025	-2.59112	-4.60817	N1LJ78	N1LJ78	>tr|N1LJ78|N1LJ78_9BACI Ferrous iron transport protein B OS=Bacillus sp. GeD10 GN=EBGED10_20880 PE=4 SV=1	N1LJ78		Ferrous iron transport protein B	>tr|N1LJ78|N1LJ78_9BACI Ferrous iron transport protein B OS=Bacillus sp. GeD10	EBGED10_20880
	N1LW48	#REF!	bged01505	Cadmium-transporting ATPase	EBGED10_42120	K01534		2.5227	3.05628	0.00087846		+	-3.01048	-2.70898	-2.25403	NaN	-2.00975	-1.19833	0.107158	-0.203949	0.464684	0.964896	-2.49581	0.0268912	2.5227	+	0	95.103	442760000	58	13	13	13	788	788	85.379	27.5	3.05628	-2.5227	-5.52976	N1LW48	N1LW48	>tr|N1LW48|N1LW48_9BACI Cadmium-transporting ATPase OS=Bacillus sp. GeD10 GN=EBGED10_42120 PE=3 SV=1	N1LW48		Cadmium-transporting ATPase	>tr|N1LW48|N1LW48_9BACI Cadmium-transporting ATPase OS=Bacillus sp. GeD10	EBGED10_42120
	N1LYL2	#REF!	bged02336	DNA-directed DNA polymerase	EBGED10_48530	K02337		2.52089	3.9328	0.000116735		+	-3.00237	-2.62091	-1.76203	-2.10607	-1.76778	-0.649828	0.121479	0.357743	0.566249	0.949657	-2.25183	0.26906	2.52089	+	0	123.88	506010000	54	16	16	16	1108	1108	126.78	22	3.9328	-2.52089	-6.96428	N1LYL2	N1LYL2	>tr|N1LYL2|N1LYL2_9BACI DNA-directed DNA polymerase OS=Bacillus sp. GeD10 GN=EBGED10_48530 PE=4 SV=1	N1LYL2		DNA-directed DNA polymerase	>tr|N1LYL2|N1LYL2_9BACI DNA-directed DNA polymerase OS=Bacillus sp. GeD10	EBGED10_48530
N1LN71	N1LN71	#N/A	#N/A	Hypothetical DUF1027 domain protein	EBGED10_14000	#N/A		2.45383	4.39533	4.02408e-05		+	-3.83265	-3.7447	-3.88679	-2.92878	NaN	NaN	-1.27371	-1.04349	-1.10771	-1.15271	-3.59823	-1.1444	2.45383	+	0	165.75	684480000	33	7	7	7	100	100	12.031	81	4.39533	-2.45383	-10.6574	N1LN71	N1LN71	>tr|N1LN71|N1LN71_9BACI Hypothetical DUF1027 domain protein OS=Bacillus sp. GeD10 GN=EBGED10_14000 PE=4 SV=1	N1LN71		Hypothetical DUF1027 domain protein	>tr|N1LN71|N1LN71_9BACI Hypothetical DUF1027 domain protein OS=Bacillus sp. GeD10	EBGED10_14000
	N1LU82	#REF!	bged01135	Cell division protein FtsX	EBGED10_49710	K09811		2.41395	3.33316	0.000464349		+	-3.89341	-3.23003	-2.48419	-3.40615	-2.53469	-1.79489	-0.0710632	-0.904344	-0.739712	0.0313025	-3.10969	-0.69574	2.41395	+	0	69.238	432300000	50	10	10	10	297	297	33.153	28.6	3.33316	-2.41395	-5.6812	N1LU82	N1LU82	>tr|N1LU82|N1LU82_9BACI Cell division protein FtsX OS=Bacillus sp. GeD10 GN=EBGED10_49710 PE=3 SV=1	N1LU82		Cell division protein FtsX	>tr|N1LU82|N1LU82_9BACI Cell division protein FtsX OS=Bacillus sp. GeD10	EBGED10_49710
	N1LPF0	#REF!	bged01692	Ferrous iron transport protein B	EBGED10_15260	K04759		2.36913	2.92228	0.00119598		+	-2.88393	-2.9322	-2.64057	-2.39834	-1.51925	-1.11782	-0.826854	0.602177	-0.219186	1.03304	-2.47486	-0.105728	2.36913	+	0	125.92	1582500000	93	9	9	9	240	240	26.759	54.2	2.92228	-2.36913	-4.89854	N1LPF0	N1LPF0	>tr|N1LPF0|N1LPF0_9BACI Ferrous iron transport protein B OS=Bacillus sp. GeD10 GN=EBGED10_15260 PE=4 SV=1	N1LPF0		Ferrous iron transport protein B	>tr|N1LPF0|N1LPF0_9BACI Ferrous iron transport protein B OS=Bacillus sp. GeD10	EBGED10_15260
	N1LLW8	#REF!	bged02535	Long-chain-fatty-acid--CoA ligase	EBGED10_9840	K15665		2.36569	2.53263	0.00293341		+	NaN	-3.36568	-3.57229	-2.74492	-1.72477	-1.46083	-0.527124	-0.935976	0.0426971	0.450104	-2.85192	-0.486226	2.36569	+	0	71.211	403180000	40	16	16	16	1518	1518	176.31	13.4	2.53263	-2.36569	-4.46075	N1LLW8	N1LLW8	>tr|N1LLW8|N1LLW8_9BACI Long-chain-fatty-acid--CoA ligase OS=Bacillus sp. GeD10 GN=EBGED10_9840 PE=4 SV=1	N1LLW8		Long-chain-fatty-acid--CoA ligase	>tr|N1LLW8|N1LLW8_9BACI Long-chain-fatty-acid--CoA ligase OS=Bacillus sp. GeD10	EBGED10_9840
	N1LS50	#REF!	bged00791	Uracil-DNA glycosylase	ung	K03648		2.32798	3.95074	0.00011201		+	NaN	-4.04181	-3.67064	-3.37116	-3.3763	NaN	-1.80841	-1.2678	-0.790203	-1.28157	-3.61498	-1.287	2.32798	+	0	68.045	593670000	40	6	6	6	225	225	25.951	40	3.95074	-2.32798	-8.90143	N1LS50	N1LS50	>tr|N1LS50|N1LS50_9BACI Uracil-DNA glycosylase OS=Bacillus sp. GeD10 GN=ung PE=3 SV=1	N1LS50		Uracil-DNA glycosylase	>tr|N1LS50|N1LS50_9BACI Uracil-DNA glycosylase OS=Bacillus sp. GeD10	ung
	N1LZD2	#REF!	bged03278	Membrane protein containing HD superfamily hydrolase domain, YQFF ortholog	EBGED10_51280	K07037		2.31868	2.93512	0.00116112		+	-2.83896	-2.97926	-3.02727	-2.61276	-2.53313	-1.92992	-0.957194	-0.408927	0.144378	0.753703	-2.79827	-0.479593	2.31868	+	0	53.645	516100000	31	8	8	8	714	714	80.069	15.5	2.93512	-2.31868	-4.92197	N1LZD2	N1LZD2	>tr|N1LZD2|N1LZD2_9BACI Membrane protein containing HD superfamily hydrolase domain, YQFF ortholog OS=Bacillus sp. GeD10 GN=EBGED10_51280 PE=4 SV=1	N1LZD2		Membrane protein containing HD superfamily hydrolase domain, YQFF ortholog	>tr|N1LZD2|N1LZD2_9BACI Membrane protein containing HD superfamily hydrolase domain, YQFF ortholog OS=Bacillus sp. GeD10	EBGED10_51280
	N1LFG5	#REF!	bged01427	Alpha-1,4 glucan phosphorylase	EBGED10_2340	K00688		2.30047	3.62571	0.000236751		+	0.793707	1.16289	1.43046	1.4811	1.61097	2.41179	3.66346	3.43042	4.23139	4.24442	1.29583	3.5963	2.30047	+	0	323.31	7284100000	336	36	36	36	802	802	93.064	64.3	3.62571	-2.30047	-6.28435	N1LFG5	N1LFG5	>tr|N1LFG5|N1LFG5_9BACI Alpha-1,4 glucan phosphorylase OS=Bacillus sp. GeD10 GN=EBGED10_2340 PE=3 SV=1	N1LFG5		Alpha-1,4 glucan phosphorylase	>tr|N1LFG5|N1LFG5_9BACI Alpha-1,4 glucan phosphorylase OS=Bacillus sp. GeD10	EBGED10_2340
	N1LL34	#REF!	bged02937	Similarity with glutathionylspermidine synthase, group 2	EBGED10_19160	K01917		2.2755	2.12124	0.00756419		+	-4.24833	NaN	-3.86808	NaN	NaN	NaN	-1.22068	-1.36509	-2.08764	-2.4574	-4.05821	-1.7827	2.2755	+	0	11.969	217420000	23	6	6	6	415	415	48.833	15.7	2.12124	-2.2755	-4.98617	N1LL34	N1LL34	>tr|N1LL34|N1LL34_9BACI Similarity with glutathionylspermidine synthase, group 2 OS=Bacillus sp. GeD10 GN=EBGED10_19160 PE=4 SV=1	N1LL34		Similarity with glutathionylspermidine synthase, group 2	>tr|N1LL34|N1LL34_9BACI Similarity with glutathionylspermidine synthase, group 2 OS=Bacillus sp. GeD10	EBGED10_19160
	N1LJW7	#REF!	bged00676	1,4-alpha-glucan branching enzyme GlgB	glgB	K00700		2.22906	2.98086	0.00104505		+	0.227506	0.00193238	0.596758	0.369672	0.686449	1.03632	2.72712	2.52581	3.30401	3.43437	0.376463	2.60553	2.22906	+	0	300.49	3912500000	193	23	23	23	645	645	75.85	63.6	2.98086	-2.22906	-5.00594	N1LJW7	N1LJW7	>tr|N1LJW7|N1LJW7_9BACI 1,4-alpha-glucan branching enzyme GlgB OS=Bacillus sp. GeD10 GN=glgB PE=3 SV=1	N1LJW7		1,4-alpha-glucan branching enzyme GlgB	>tr|N1LJW7|N1LJW7_9BACI 1,4-alpha-glucan branching enzyme GlgB OS=Bacillus sp. GeD10	glgB
N1M181	N1M181	#N/A	bged02706	Uncharacterized protein	EBGED10_60220	#N/A		2.21935	2.41599	0.00383717		+	NaN	-4.56915	NaN	NaN	-3.83525	NaN	-1.57154	-1.93845	-1.91007	-2.51133	-4.2022	-1.98285	2.21935	+	0	49.271	387500000	13	4	4	4	159	159	18.981	33.3	2.41599	-2.21935	-6.01927	N1M181	N1M181	>tr|N1M181|N1M181_9BACI Uncharacterized protein OS=Bacillus sp. GeD10 GN=EBGED10_60220 PE=4 SV=1	N1M181		Uncharacterized protein	>tr|N1M181|N1M181_9BACI Uncharacterized protein OS=Bacillus sp. GeD10	EBGED10_60220
	N1LXD3	#REF!	bged02074	Phosphoribosylglycinamide synthetase, ATP-grasp (A) domain protein	EBGED10_43880	K13037		2.18826	3.19143	0.000643528		+	-3.97634	-4.08933	-2.45547	-2.40002	-3.25974	-1.69447	-0.932985	-0.575544	-1.15847	-0.878145	-3.23618	-1.04792	2.18826	+	0	55.56	315090000	52	9	9	9	424	424	47.816	25.2	3.19143	-2.18826	-5.40324	N1LXD3	N1LXD3	>tr|N1LXD3|N1LXD3_9BACI Phosphoribosylglycinamide synthetase, ATP-grasp (A) domain protein OS=Bacillus sp. GeD10 GN=EBGED10_43880 PE=4 SV=1	N1LXD3		Phosphoribosylglycinamide synthetase, ATP-grasp (A) domain protein	>tr|N1LXD3|N1LXD3_9BACI Phosphoribosylglycinamide synthetase, ATP-grasp (A) domain protein OS=Bacillus sp. GeD10	EBGED10_43880
	N1LXP0	#REF!	bged02575	Low molecular weight protein tyrosine phosphatase	EBGED10_44830	K01104		2.18376	2.00598	0.00986314		+	-3.68572	-4.33454	-5.05077	-3.77841	NaN	NaN	-1.97022	-2.08698	NaN	NaN	-4.21236	-2.0286	2.18376	+	0	42.372	168830000	15	3	3	3	146	146	15.953	21.2	2.00598	-2.18376	-4.62242	N1LXP0	N1LXP0	>tr|N1LXP0|N1LXP0_9BACI Low molecular weight protein tyrosine phosphatase OS=Bacillus sp. GeD10 GN=EBGED10_44830 PE=4 SV=1	N1LXP0		Low molecular weight protein tyrosine phosphatase	>tr|N1LXP0|N1LXP0_9BACI Low molecular weight protein tyrosine phosphatase OS=Bacillus sp. GeD10	EBGED10_44830
	N1LTK8	#REF!	bged00673	Cytoplasmic axial filament protein CafA and Ribonuclease G	EBGED10_53050	K08301		2.18067	4.41414	3.85351e-05		+	NaN	-2.96485	-3.42069	-2.73338	-3.16756	-0.65161	-1.49956	-0.596604	-0.617715	-1.08924	-3.07162	-0.890946	2.18067	+	0	65.221	267770000	32	9	9	9	462	462	53.606	22.9	4.41414	-2.18067	-9.14157	N1LTK8	N1LTK8	>tr|N1LTK8|N1LTK8_9BACI Cytoplasmic axial filament protein CafA and Ribonuclease G OS=Bacillus sp. GeD10 GN=EBGED10_53050 PE=4 SV=1	N1LTK8		Cytoplasmic axial filament protein CafA and Ribonuclease G	>tr|N1LTK8|N1LTK8_9BACI Cytoplasmic axial filament protein CafA and Ribonuclease G OS=Bacillus sp. GeD10	EBGED10_53050
	N1LPZ8	#REF!	bged01402	Peptide methionine sulfoxide reductase MsrA / Peptide methionine sulfoxide reductase MsrB	EBGED10_17360	K12267		2.17769	2.4412	0.00362075		+	NaN	-3.58144	-2.71306	NaN	NaN	NaN	-0.80064	-0.623804	-1.13001	-1.3238	-3.14725	-0.969563	2.17769	+	0	87.825	496320000	24	7	7	7	321	321	36.97	29.3	2.4412	-2.17769	-6.11519	N1LPZ8	N1LPZ8	>tr|N1LPZ8|N1LPZ8_9BACI Peptide methionine sulfoxide reductase MsrA / Peptide methionine sulfoxide reductase MsrB OS=Bacillus sp. GeD10 GN=EBGED10_17360 PE=3 SV=1	N1LPZ8		Peptide methionine sulfoxide reductase MsrA / Peptide methionine sulfoxide reductase MsrB	>tr|N1LPZ8|N1LPZ8_9BACI Peptide methionine sulfoxide reductase MsrA / Peptide methionine sulfoxide reductase MsrB OS=Bacillus sp. GeD10	EBGED10_17360
	N1LL67	#REF!	bged01723	Sulfate/thiosulfate import ATP-binding protein CysA	cysA	K02045		2.17312	2.55579	0.00278107		+	-1.0675	NaN	NaN	-1.59479	NaN	NaN	NaN	0.726825	0.749156	1.04995	-1.33115	0.841976	2.17312	+	0	6.1883	2929800000	13	4	4	4	357	357	39.987	16.5	2.55579	-2.17312	-9.12569	N1LL67	N1LL67	>tr|N1LL67|N1LL67_9BACI Sulfate/thiosulfate import ATP-binding protein CysA OS=Bacillus sp. GeD10 GN=cysA PE=3 SV=1	N1LL67		Sulfate/thiosulfate import ATP-binding protein CysA	>tr|N1LL67|N1LL67_9BACI Sulfate/thiosulfate import ATP-binding protein CysA OS=Bacillus sp. GeD10	cysA
	N1LMM7	#REF!	bged02633	Cell wall surface anchor family protein	EBGED10_32100	K00058		2.16635	4.51356	3.06506e-05		+	-1.22927	-0.694046	-0.887766	-0.730498	-0.593018	1.17538	0.586376	1.27503	1.86729	1.79307	-0.82692	1.33943	2.16635	+	0	211.01	1348900000	119	25	25	25	932	932	102.87	31.4	4.51356	-2.16635	-8.40127	N1LMM7	N1LMM7	>tr|N1LMM7|N1LMM7_9BACI Cell wall surface anchor family protein OS=Bacillus sp. GeD10 GN=EBGED10_32100 PE=4 SV=1	N1LMM7		Cell wall surface anchor family protein	>tr|N1LMM7|N1LMM7_9BACI Cell wall surface anchor family protein OS=Bacillus sp. GeD10	EBGED10_32100
	N1LST8	#REF!	bged02288	Protein YceG like	EBGED10_50200	K07082		2.16433	2.0741	0.0084314		+	NaN	NaN	-3.33533	NaN	-3.45981	NaN	-2.10419	-0.87949	-1.12222	-0.827049	-3.39757	-1.23324	2.16433	+	0	128.91	412860000	20	10	10	10	356	356	40.155	35.4	2.0741	-2.16433	-4.83487	N1LST8	N1LST8	>tr|N1LST8|N1LST8_9BACI Protein YceG like OS=Bacillus sp. GeD10 GN=EBGED10_50200 PE=4 SV=1	N1LST8		Protein YceG like	>tr|N1LST8|N1LST8_9BACI Protein YceG like OS=Bacillus sp. GeD10	EBGED10_50200
N1LNI9	N1LNI9	#REF!	bged02277	Uncharacterized protein	EBGED10_35200	K11030		2.14853	2.98112	0.00104442		+	-4.19952	-2.99497	-3.14033	-2.71281	-2.08523	-1.67118	-1.00966	-0.450989	-1.05142	-0.206982	-3.02657	-0.878046	2.14853	+	0	52.386	297420000	41	8	8	12	968	968	108.89	11.3	2.98112	-2.14853	-5.00642	N1LNI9	N1LNI9	>tr|N1LNI9|N1LNI9_9BACI Uncharacterized protein OS=Bacillus sp. GeD10 GN=EBGED10_35200 PE=4 SV=1	N1LNI9		Uncharacterized protein	>tr|N1LNI9|N1LNI9_9BACI Uncharacterized protein OS=Bacillus sp. GeD10	EBGED10_35200
	N1LT56	#REF!	bged00621	Helicase, SNF2/RAD54 family	EBGED10_45240	K01554		2.12926	2.51435	0.00305949		+	NaN	-2.36407	-1.63754	-1.47708	-1.14102	-0.959372	0.67353	0.52294	1.04826	1.0863	-1.65493	0.474331	2.12926	+	0	285.11	721980000	60	19	19	19	918	918	106.19	27.9	2.51435	-2.12926	-4.42587	N1LT56	N1LT56	>tr|N1LT56|N1LT56_9BACI Helicase, SNF2/RAD54 family OS=Bacillus sp. GeD10 GN=EBGED10_45240 PE=4 SV=1	N1LT56		Helicase, SNF2/RAD54 family	>tr|N1LT56|N1LT56_9BACI Helicase, SNF2/RAD54 family OS=Bacillus sp. GeD10	EBGED10_45240
	N1LHV1	#REF!	#N/A	Adenylate-forming enzyme	EBGED10_16430	K01912		2.10293	3.99066	0.000102173		+	-1.63296	-1.34294	-1.93199	-0.788562	-1.30448	-0.0893026	1.17406	1.01253	0.500377	0.916036	-1.40019	0.702741	2.10293	+	0	106.91	1136100000	109	16	16	16	445	445	51.974	36	3.99066	-2.10293	-7.09822	N1LHV1	N1LHV1	>tr|N1LHV1|N1LHV1_9BACI Adenylate-forming enzyme OS=Bacillus sp. GeD10 GN=EBGED10_16430 PE=4 SV=1	N1LHV1		Adenylate-forming enzyme	>tr|N1LHV1|N1LHV1_9BACI Adenylate-forming enzyme OS=Bacillus sp. GeD10	EBGED10_16430
	N1LX01	#REF!	bged02923	Beta-lactamase	EBGED10_42780	K01467		2.1006	4.12456	7.50646e-05		+	-0.521966	0.148684	0.250445	0.411869	0.640895	1.76019	1.84021	2.45162	2.76225	2.61864	0.185985	2.28658	2.1006	+	0	323.31	3587700000	167	16	16	16	485	485	54.614	42.1	4.12456	-2.1006	-7.41564	N1LX01	N1LX01	>tr|N1LX01|N1LX01_9BACI Beta-lactamase OS=Bacillus sp. GeD10 GN=EBGED10_42780 PE=4 SV=1	N1LX01		Beta-lactamase	>tr|N1LX01|N1LX01_9BACI Beta-lactamase OS=Bacillus sp. GeD10	EBGED10_42780
	N1LP52	#REF!	bged00822	RND multidrug efflux transporter Acriflavin resistance protein	EBGED10_17350	K03296		2.08827	2.8816	0.00131341		+	-2.23956	-1.49193	-0.984871	-1.17199	-0.385448	-0.193388	0.991202	0.575535	1.16898	1.62522	-1.25476	0.83351	2.08827	+	0	59.321	761100000	80	20	20	20	1038	1038	112.37	22.4	2.8816	-2.08827	-4.82474	N1LP52	N1LP52	>tr|N1LP52|N1LP52_9BACI RND multidrug efflux transporter Acriflavin resistance protein OS=Bacillus sp. GeD10 GN=EBGED10_17350 PE=4 SV=1	N1LP52		RND multidrug efflux transporter Acriflavin resistance protein	>tr|N1LP52|N1LP52_9BACI RND multidrug efflux transporter Acriflavin resistance protein OS=Bacillus sp. GeD10	EBGED10_17350
	N1LSE1	#REF!	bged00762	Thymidylate synthase	thyA	K00560		2.06932	1.74257	0.0180895		+	-2.29323	-2.21997	-0.755265	-1.3981	-1.017	-1.95114	0.936184	1.07042	1.22805	1.37952	-1.53671	0.532608	2.06932	+	0	74.542	1993500000	77	11	11	11	318	318	36.88	50.3	1.74257	-2.06932	-2.96205	N1LSE1	N1LSE1	>tr|N1LSE1|N1LSE1_9BACI Thymidylate synthase OS=Bacillus sp. GeD10 GN=thyA PE=3 SV=1	N1LSE1		Thymidylate synthase	>tr|N1LSE1|N1LSE1_9BACI Thymidylate synthase OS=Bacillus sp. GeD10	thyA
	N1LX61	#REF!	bged03127	Aldehyde dehydrogenase family protein	EBGED10_43280	K00135		2.0658	2.71477	0.00192857		+	-2.93005	NaN	NaN	NaN	-2.91748	-1.64351	-0.64143	-0.887965	-0.656107	-0.460796	-2.92377	-0.857962	2.0658	+	0	49.645	444110000	46	7	7	7	474	474	51.921	19	2.71477	-2.0658	-5.94166	N1LX61	N1LX61	>tr|N1LX61|N1LX61_9BACI Aldehyde dehydrogenase family protein OS=Bacillus sp. GeD10 GN=EBGED10_43280 PE=4 SV=1	N1LX61		Aldehyde dehydrogenase family protein	>tr|N1LX61|N1LX61_9BACI Aldehyde dehydrogenase family protein OS=Bacillus sp. GeD10	EBGED10_43280
	N1LNZ5	#REF!	bged00591	Enoyl-CoA hydratase [isoleucine degradation] / 3-hydroxyacyl-CoA dehydrogenase	EBGED10_13610	K07516		2.05935	3.4471	0.000357192		+	2.75608	3.08815	3.02467	2.97182	3.40173	3.90552	5.45771	4.94979	5.38337	5.8428	3.04849	5.10784	2.05935	+	0	323.31	20812000000	512	44	44	44	793	793	87.411	61	3.4471	-2.05935	-5.91125	N1LNZ5	N1LNZ5	>tr|N1LNZ5|N1LNZ5_9BACI Enoyl-CoA hydratase [isoleucine degradation] / 3-hydroxyacyl-CoA dehydrogenase OS=Bacillus sp. GeD10 GN=EBGED10_13610 PE=4 SV=1	N1LNZ5		Enoyl-CoA hydratase [isoleucine degradation] / 3-hydroxyacyl-CoA dehydrogenase	>tr|N1LNZ5|N1LNZ5_9BACI Enoyl-CoA hydratase [isoleucine degradation] / 3-hydroxyacyl-CoA dehydrogenase OS=Bacillus sp. GeD10	EBGED10_13610
	N1LNS4	#REF!	bged00895	PTS system, fructose-specific IIA component / PTS system, fructose-specific IIB component / PTS system, fructose-specific IIC component	EBGED10_29340	K02768		2.03232	3.08833	0.00081597		+	-1.49639	-1.92541	-2.37337	-1.23102	-0.391084	-0.126373	0.524236	0.496918	0.749934	1.0996	-1.48345	0.548864	2.03232	+	0	71.551	689130000	63	11	11	11	618	618	65.294	26.1	3.08833	-2.03232	-5.20643	N1LNS4	N1LNS4	>tr|N1LNS4|N1LNS4_9BACI PTS system, fructose-specific IIA component / PTS system, fructose-specific IIB component / PTS system, fructose-specific IIC component OS=Bacillus sp. GeD10 GN=EBGED10_29340 PE=4 SV=1	N1LNS4		PTS system, fructose-specific IIA component / PTS system, fructose-specific IIB component / PTS system, fructose-specific IIC component	>tr|N1LNS4|N1LNS4_9BACI PTS system, fructose-specific IIA component / PTS system, fructose-specific IIB component / PTS system, fructose-specific IIC component OS=Bacillus sp. GeD10	EBGED10_29340
	N1LRA7	#REF!	bged00099	2,3-cyclic-nucleotide 2-phosphodiesterase	EBGED10_24860	K01119		1.97954	4.359	4.37526e-05		+	-0.813246	-0.732969	-0.408015	-0.868169	-0.247161	0.786514	0.923316	1.62133	1.6067	1.89026	-0.613912	1.36562	1.97954	+	0	161.99	1510800000	113	27	27	27	773	773	85.241	46.2	4.359	-1.97954	-7.99785	N1LRA7	N1LRA7	>tr|N1LRA7|N1LRA7_9BACI 2,3-cyclic-nucleotide 2-phosphodiesterase OS=Bacillus sp. GeD10 GN=EBGED10_24860 PE=3 SV=1	N1LRA7		2,3-cyclic-nucleotide 2-phosphodiesterase	>tr|N1LRA7|N1LRA7_9BACI 2,3-cyclic-nucleotide 2-phosphodiesterase OS=Bacillus sp. GeD10	EBGED10_24860
	N1LLY2	#REF!	bged00153	Riboflavin biosynthesis protein RibBA	ribBA	K14652		1.97554	2.32437	0.00473834		+	NaN	-2.16652	NaN	-2.14662	NaN	-1.09643	-0.160385	0.357115	-0.0253811	0.0199545	-2.15657	-0.181025	1.97554	+	0	56.657	771670000	36	13	13	13	397	397	43.926	43.8	2.32437	-1.97554	-4.83436	N1LLY2	N1LLY2	>tr|N1LLY2|N1LLY2_9BACI Riboflavin biosynthesis protein RibBA OS=Bacillus sp. GeD10 GN=ribBA PE=3 SV=1	N1LLY2		Riboflavin biosynthesis protein RibBA	>tr|N1LLY2|N1LLY2_9BACI Riboflavin biosynthesis protein RibBA OS=Bacillus sp. GeD10	ribBA
	N1LLJ1	#REF!	bged01994	Lactate utilization protein B	lutB	K18929		1.95081	1.81089	0.0154563		+	-0.759321	-1.40093	-1.08995	-1.31736	-1.20259	-1.61517	1.20727	2.04445	1.28208	1.06524	-1.15403	0.796776	1.95081	+	0	263.24	2591600000	112	11	11	11	473	473	52.626	35.3	1.81089	-1.95081	-3.06536	N1LLJ1	N1LLJ1	>tr|N1LLJ1|N1LLJ1_9BACI Lactate utilization protein B OS=Bacillus sp. GeD10 GN=lutB PE=3 SV=1	N1LLJ1		Lactate utilization protein B	>tr|N1LLJ1|N1LLJ1_9BACI Lactate utilization protein B OS=Bacillus sp. GeD10	lutB
	N1LQR9	#REF!	bged00209	DinG family ATP-dependent helicase YpvA	EBGED10_38060	K03722		1.94395	3.17555	0.000667505		+	1.12803	0.96865	1.39085	1.4699	1.68275	2.0086	3.22861	3.4877	3.99007	3.64495	1.32803	3.27199	1.94395	+	0	323.31	6518500000	169	31	31	31	645	645	74.685	62.8	3.17555	-1.94395	-5.37262	N1LQR9	N1LQR9	>tr|N1LQR9|N1LQR9_9BACI DinG family ATP-dependent helicase YpvA OS=Bacillus sp. GeD10 GN=EBGED10_38060 PE=4 SV=1	N1LQR9		DinG family ATP-dependent helicase YpvA	>tr|N1LQR9|N1LQR9_9BACI DinG family ATP-dependent helicase YpvA OS=Bacillus sp. GeD10	EBGED10_38060
	N1LI62	#REF!	bged00644	Methylmalonate semialdehyde dehydrogenase [acylating]	iolA	K00140		1.9189	4.43487	3.67394e-05		+	-0.933481	-0.785804	-1.58614	-0.344803	-0.976187	0.55878	0.926235	1.15664	1.27127	1.05519	-0.925282	0.993623	1.9189	+	0	173.37	1956400000	91	22	22	22	486	486	52.923	61.1	4.43487	-1.9189	-8.19387	N1LI62	N1LI62	>tr|N1LI62|N1LI62_9BACI Methylmalonate semialdehyde dehydrogenase [acylating] OS=Bacillus sp. GeD10 GN=iolA PE=3 SV=1	N1LI62		Methylmalonate semialdehyde dehydrogenase [acylating]	>tr|N1LI62|N1LI62_9BACI Methylmalonate semialdehyde dehydrogenase [acylating] OS=Bacillus sp. GeD10	iolA
	N1LFE8	#REF!	bged02563	Phosphoadenosine phosphosulfate reductase	cysH	K00390		1.8991	2.87316	0.00133917		+	-4.51438	-3.46307	-3.55482	-3.37524	-3.55288	-2.874	-2.17121	-0.942972	-1.61354	-1.36316	-3.69208	-1.79298	1.8991	+	0	23.646	396330000	53	10	10	10	234	234	27.342	41.9	2.87316	-1.8991	-4.80951	N1LFE8	N1LFE8	>tr|N1LFE8|N1LFE8_9BACI Phosphoadenosine phosphosulfate reductase OS=Bacillus sp. GeD10 GN=cysH PE=3 SV=1	N1LFE8		Phosphoadenosine phosphosulfate reductase	>tr|N1LFE8|N1LFE8_9BACI Phosphoadenosine phosphosulfate reductase OS=Bacillus sp. GeD10	cysH
	N1LL65	#REF!	#N/A	Membrane-associated protein containing a homolog of PilT-like ATPase N-terminal domain, YACL B.subtilis ortholog	EBGED10_22480	K02601		1.8969	2.50229	0.00314567		+	-2.97958	-2.70757	-2.08678	-2.23489	-1.89633	-1.86047	-0.587472	-0.417377	-0.243512	0.688195	-2.38103	-0.484127	1.8969	+	0	169.55	623550000	38	6	6	6	369	369	40.871	22	2.50229	-1.8969	-4.16451	N1LL65	N1LL65	>tr|N1LL65|N1LL65_9BACI Membrane-associated protein containing a homolog of PilT-like ATPase N-terminal domain, YACL B.subtilis ortholog OS=Bacillus sp. GeD10 GN=EBGED10_22480 PE=4 SV=1	N1LL65		Membrane-associated protein containing a homolog of PilT-like ATPase N-terminal domain, YACL B.subtilis ortholog	>tr|N1LL65|N1LL65_9BACI Membrane-associated protein containing a homolog of PilT-like ATPase N-terminal domain, YACL B.subtilis ortholog OS=Bacillus sp. GeD10	EBGED10_22480
	N1LHY7		bged01974	L-cystine uptake protein TcyP	EBGED10_10930	K06956		1.88759	2.69616	0.00201297		+	-0.153141	-0.7913	0.388772	-0.222421	0.336869	0.584533	1.42137	2.09181	2.28973	2.6093	-0.0882444	1.79935	1.88759	+	0	126.15	1473000000	66	10	10	10	464	464	49.282	25	2.69616	-1.88759	-4.4959	N1LHY7	N1LHY7	>tr|N1LHY7|N1LHY7_9BACI L-cystine uptake protein TcyP OS=Bacillus sp. GeD10 GN=EBGED10_10930 PE=4 SV=1	N1LHY7		L-cystine uptake protein TcyP	>tr|N1LHY7|N1LHY7_9BACI L-cystine uptake protein TcyP OS=Bacillus sp. GeD10	EBGED10_10930
	N1LUG7		bged02636	Protein-export membrane protein SecD (TC 3.A.5.1.1) / Protein-export membrane protein SecF (TC 3.A.5.1.1)	EBGED10_49940	K12257		1.8858	2.87589	0.00133078		+	0.728576	0.636719	0.993975	0.955968	1.4917	2.06483	2.41225	2.32509	3.57541	3.85835	0.961388	2.84718	1.8858	+	0	323.31	3242300000	179	29	29	29	754	754	82.526	35.5	2.87589	-1.8858	-4.81443	N1LUG7	N1LUG7	>tr|N1LUG7|N1LUG7_9BACI Protein-export membrane protein SecD (TC 3.A.5.1.1) / Protein-export membrane protein SecF (TC 3.A.5.1.1) OS=Bacillus sp. GeD10 GN=EBGED10_49940 PE=3 SV=1	N1LUG7		Protein-export membrane protein SecD (TC 3.A.5.1.1) / Protein-export membrane protein SecF (TC 3.A.5.1.1)	>tr|N1LUG7|N1LUG7_9BACI Protein-export membrane protein SecD (TC 3.A.5.1.1) / Protein-export membrane protein SecF (TC 3.A.5.1.1) OS=Bacillus sp. GeD10	EBGED10_49940
	N1LS64		bged01191	Aspartate ammonia-lyase	EBGED10_41990	K01744		1.8796	2.90467	0.00124547		+	NaN	-4.37758	-4.27553	-3.3388	-4.03263	NaN	NaN	-1.9718	-2.28775	-2.12007	-4.00614	-2.12654	1.8796	+	0	35.732	176120000	23	11	11	11	477	477	52.525	34.2	2.90467	-1.8796	-6.54666	N1LS64	N1LS64	>tr|N1LS64|N1LS64_9BACI Aspartate ammonia-lyase OS=Bacillus sp. GeD10 GN=EBGED10_41990 PE=3 SV=1	N1LS64		Aspartate ammonia-lyase	>tr|N1LS64|N1LS64_9BACI Aspartate ammonia-lyase OS=Bacillus sp. GeD10	EBGED10_41990
	N1M0G2		bged02610	tRNA-2-methylthio-N(6)-dimethylallyladenosine synthase	miaB	K06168		1.8375	1.60508	0.024827		+	-1.04368	-1.15833	-0.535056	-0.504287	-0.48338	-1.48574	1.70824	1.80506	1.44914	1.98609	-0.744945	1.09256	1.8375	+	0	208.83	2232500000	117	19	19	19	509	509	58.321	35.4	1.60508	-1.8375	-2.75602	N1M0G2	N1M0G2	>tr|N1M0G2|N1M0G2_9BACI tRNA-2-methylthio-N(6)-dimethylallyladenosine synthase OS=Bacillus sp. GeD10 GN=miaB PE=3 SV=1	N1M0G2		tRNA-2-methylthio-N(6)-dimethylallyladenosine synthase	>tr|N1M0G2|N1M0G2_9BACI tRNA-2-methylthio-N(6)-dimethylallyladenosine synthase OS=Bacillus sp. GeD10	miaB
	N1LNV3		bged02077	Conserved domain protein	EBGED10_16400	K00545		1.83056	1.97565	0.0105766		+	-3.07489	-3.39903	NaN	-2.54278	NaN	NaN	-2.01072	-1.42088	-0.857431	-0.411005	-3.00557	-1.17501	1.83056	+	0	92.418	147930000	12	4	4	4	387	387	44.666	14.7	1.97565	-1.83056	-3.97563	N1LNV3	N1LNV3	>tr|N1LNV3|N1LNV3_9BACI Conserved domain protein OS=Bacillus sp. GeD10 GN=EBGED10_16400 PE=4 SV=1	N1LNV3		Conserved domain protein	>tr|N1LNV3|N1LNV3_9BACI Conserved domain protein OS=Bacillus sp. GeD10	EBGED10_16400
	N1LQV2		bged02279	Serine transporter	EBGED10_37240	K03837		1.80449	1.61914	0.0240358		+	NaN	-3.71717	NaN	NaN	-3.00071	-2.24304	-1.82463	NaN	-1.32324	-0.826886	-3.35894	-1.55445	1.80449	+	0	21.173	119220000	22	NaN	6	6	NaN	439	48.042	14.1	1.61914	-1.80449	-3.53896	N1LQV2;N1LWV5	N1LQV2	>tr|N1LQV2|N1LQV2_9BACI Serine transporter OS=Bacillus sp. GeD10 GN=EBGED10_37240 PE=4 SV=1	N1LQV2		Serine transporter	>tr|N1LQV2|N1LQV2_9BACI Serine transporter OS=Bacillus sp. GeD10	EBGED10_37240
	N1LVV3		bged01550	Multimodular transpeptidase-transglycosylase / Penicillin-binding protein 1A/1B (PBP1)	EBGED10_38280	K05366		1.79822	2.90891	0.00123336		+	-2.31925	-2.30226	-2.0665	-2.54404	-1.87205	-1.74706	-0.422014	-0.116739	-0.125655	0.298469	-2.22082	-0.4226	1.79822	+	0	79.068	449860000	80	12	12	12	889	889	98.384	22.9	2.90891	-1.79822	-4.87422	N1LVV3	N1LVV3	>tr|N1LVV3|N1LVV3_9BACI Multimodular transpeptidase-transglycosylase / Penicillin-binding protein 1A/1B (PBP1) OS=Bacillus sp. GeD10 GN=EBGED10_38280 PE=4 SV=1	N1LVV3		Multimodular transpeptidase-transglycosylase / Penicillin-binding protein 1A/1B (PBP1)	>tr|N1LVV3|N1LVV3_9BACI Multimodular transpeptidase-transglycosylase / Penicillin-binding protein 1A/1B (PBP1) OS=Bacillus sp. GeD10	EBGED10_38280
	N1LWL8		bged02275	Leucine--tRNA ligase	leuS	K01869		1.78503	3.24763	0.000565423		+	4.68304	4.64802	4.44477	4.67534	4.51415	5.16059	6.46006	6.4929	6.77032	7.00662	4.59306	6.3781	1.78503	+	0	323.31	56666000000	1001	57	57	57	802	802	91.352	80.4	3.24763	-1.78503	-5.51239	N1LWL8	N1LWL8	>tr|N1LWL8|N1LWL8_9BACI Leucine--tRNA ligase OS=Bacillus sp. GeD10 GN=leuS PE=3 SV=1	N1LWL8		Leucine--tRNA ligase	>tr|N1LWL8|N1LWL8_9BACI Leucine--tRNA ligase OS=Bacillus sp. GeD10	leuS
N1LLA4	N1LLA4		#N/A	Uncharacterized protein	EBGED10_27640	#N/A		1.78427	2.99957	0.001001		+	-2.86994	-2.46471	-3.28469	-2.63352	-2.16548	-1.56678	-1.47355	-1.0304	-0.382051	-0.0441892	-2.68367	-0.899394	1.78427	+	0	68.085	292980000	32	5	5	5	845	845	96.675	10.8	2.99957	-1.78427	-5.0405	N1LLA4	N1LLA4	>tr|N1LLA4|N1LLA4_9BACI Uncharacterized protein OS=Bacillus sp. GeD10 GN=EBGED10_27640 PE=4 SV=1	N1LLA4		Uncharacterized protein	>tr|N1LLA4|N1LLA4_9BACI Uncharacterized protein OS=Bacillus sp. GeD10	EBGED10_27640
	N1LLH1		bged01582	4-hydroxyphenylpyruvate dioxygenase	EBGED10_21070	K00457		1.77584	4.69384	2.02377e-05		+	-0.177605	0.844201	0.726663	0.288641	0.465817	2.17232	2.46233	1.98276	2.08051	2.32902	0.429543	2.20539	1.77584	+	0	287.67	2954100000	148	20	20	20	372	372	42.092	67.7	4.69384	-1.77584	-8.8927	N1LLH1	N1LLH1	>tr|N1LLH1|N1LLH1_9BACI 4-hydroxyphenylpyruvate dioxygenase OS=Bacillus sp. GeD10 GN=EBGED10_21070 PE=3 SV=1	N1LLH1		4-hydroxyphenylpyruvate dioxygenase	>tr|N1LLH1|N1LLH1_9BACI 4-hydroxyphenylpyruvate dioxygenase OS=Bacillus sp. GeD10	EBGED10_21070
	N1LXA2		#N/A	Alternate gene name: ydjQ	EBGED10_43630	#N/A		1.75754	2.74445	0.00180115		+	-2.67911	-3.63214	-3.37259	-2.65434	NaN	-2.04052	-1.48701	-0.875074	-1.59611	-0.63629	-3.08454	-1.327	1.75754	+	0	156.47	250260000	38	5	5	5	328	328	37.277	28.7	2.74445	-1.75754	-4.87634	N1LXA2	N1LXA2	>tr|N1LXA2|N1LXA2_9BACI Alternate gene name: ydjQ OS=Bacillus sp. GeD10 GN=EBGED10_43630 PE=4 SV=1	N1LXA2		Alternate gene name: ydjQ	>tr|N1LXA2|N1LXA2_9BACI Alternate gene name: ydjQ OS=Bacillus sp. GeD10	EBGED10_43630
	N1LHV8		bged01733	Spermidine/putrescine import ATP-binding protein PotA	potA	K11072		1.73467	2.33266	0.00464879		+	NaN	-3.10129	-3.25118	-2.43213	NaN	-2.16802	-1.28497	-0.944072	-0.902671	-0.667903	-2.9282	-1.19353	1.73467	+	0	35.221	391440000	22	6	6	6	327	327	37.405	21.1	2.33266	-1.73467	-4.38385	N1LHV8	N1LHV8	>tr|N1LHV8|N1LHV8_9BACI Spermidine/putrescine import ATP-binding protein PotA OS=Bacillus sp. GeD10 GN=potA PE=3 SV=1	N1LHV8		Spermidine/putrescine import ATP-binding protein PotA	>tr|N1LHV8|N1LHV8_9BACI Spermidine/putrescine import ATP-binding protein PotA OS=Bacillus sp. GeD10	potA
	N1LPS1		bged03112	Oxidoreductase of aldo/keto reductase family,subgroup 1	EBGED10_16710	K00100		1.73059	3.41888	0.000381169		+	-2.69591	-2.67462	-1.57803	-2.24149	-2.63282	NaN	-0.829497	-0.847318	-0.619819	-0.23933	-2.36458	-0.633991	1.73059	+	0	39.476	758330000	23	9	9	9	277	277	31.783	43.3	3.41888	-1.73059	-6.36108	N1LPS1	N1LPS1	>tr|N1LPS1|N1LPS1_9BACI Oxidoreductase of aldo/keto reductase family,subgroup 1 OS=Bacillus sp. GeD10 GN=EBGED10_16710 PE=4 SV=1	N1LPS1		Oxidoreductase of aldo/keto reductase family,subgroup 1	>tr|N1LPS1|N1LPS1_9BACI Oxidoreductase of aldo/keto reductase family,subgroup 1 OS=Bacillus sp. GeD10	EBGED10_16710
	N1LZR6		bged01369	Aliphatic amidase amiE	EBGED10_54770	K08590		1.72709	2.13202	0.00737875		+	-2.74063	-2.73175	-2.0185	-2.08908	-1.97601	-2.24885	-0.0301854	-0.377472	-0.662797	0.398793	-2.31119	-0.584101	1.72709	+	0	149.77	1020500000	33	7	7	7	259	259	29.527	35.1	2.13202	-1.72709	-3.56204	N1LZR6	N1LZR6	>tr|N1LZR6|N1LZR6_9BACI Aliphatic amidase amiE OS=Bacillus sp. GeD10 GN=EBGED10_54770 PE=4 SV=1	N1LZR6		Aliphatic amidase amiE	>tr|N1LZR6|N1LZR6_9BACI Aliphatic amidase amiE OS=Bacillus sp. GeD10	EBGED10_54770
	N1M0K6		bged00735	GTPase	EBGED10_55630	#N/A		1.72257	1.78699	0.016331		+	-2.36561	-1.02967	-2.13022	-0.933845	-0.364863	1.00464	-1.06789	-0.150133	1.1524	0.849645	-1.36484	0.357731	1.72257	+	0	71.524	858180000	70	9	9	9	151	151	16.935	39.7	1.78699	-1.72257	-3.02913	N1M0K6	N1M0K6	>tr|N1M0K6|N1M0K6_9BACI GTPase OS=Bacillus sp. GeD10 GN=EBGED10_55630 PE=4 SV=1	N1M0K6		GTPase	>tr|N1M0K6|N1M0K6_9BACI GTPase OS=Bacillus sp. GeD10	EBGED10_55630
	N1LNM1		bged00893	Hypoxanthine/guanine permease PbuG	EBGED10_28890	K06901		1.71972	2.70585	0.00196857		+	-3.97763	NaN	-3.81322	-3.51743	-3.50847	-2.98784	-2.18133	-1.98021	-1.58277	-1.19022	-3.70419	-1.98447	1.71972	+	0	9.3771	85479000	14	2	2	2	441	441	46.321	5.7	2.70585	-1.71972	-4.79899	N1LNM1	N1LNM1	>tr|N1LNM1|N1LNM1_9BACI Hypoxanthine/guanine permease PbuG OS=Bacillus sp. GeD10 GN=EBGED10_28890 PE=4 SV=1	N1LNM1		Hypoxanthine/guanine permease PbuG	>tr|N1LNM1|N1LNM1_9BACI Hypoxanthine/guanine permease PbuG OS=Bacillus sp. GeD10	EBGED10_28890
	N1LX92		bged03119	Short chain dehydrogenase	EBGED10_43530	K00034		1.71181	6.02113	9.52516e-07		+	-2.75875	-2.88815	-2.90656	-2.92839	-2.70476	NaN	-1.01374	-1.33482	-1.2771	-0.876379	-2.83732	-1.12551	1.71181	+	0	104.27	704220000	53	8	8	8	247	247	26.487	52.6	6.02113	-1.71182	-15.8797	N1LX92	N1LX92	>tr|N1LX92|N1LX92_9BACI Short chain dehydrogenase OS=Bacillus sp. GeD10 GN=EBGED10_43530 PE=3 SV=1	N1LX92		Short chain dehydrogenase	>tr|N1LX92|N1LX92_9BACI Short chain dehydrogenase OS=Bacillus sp. GeD10	EBGED10_43530
	N1LUB2		bged00213	Single-stranded-DNA-specific exonuclease RecJ	EBGED10_49960	K07462		1.7018	2.77026	0.00169724		+	-0.0459593	0.65635	0.417049	0.18259	0.752459	0.924278	2.06293	1.98116	2.64183	2.86126	0.392498	2.09429	1.7018	+	0	323.31	2668800000	105	19	19	19	779	779	88.136	41.7	2.77026	-1.7018	-4.62583	N1LUB2	N1LUB2	>tr|N1LUB2|N1LUB2_9BACI Single-stranded-DNA-specific exonuclease RecJ OS=Bacillus sp. GeD10 GN=EBGED10_49960 PE=4 SV=1	N1LUB2		Single-stranded-DNA-specific exonuclease RecJ	>tr|N1LUB2|N1LUB2_9BACI Single-stranded-DNA-specific exonuclease RecJ OS=Bacillus sp. GeD10	EBGED10_49960
	N1LS51		bged02262	ATP-dependent helicase/nuclease subunit A	addA	K16898		1.69023	2.81129	0.00154424		+	-0.685942	-0.391561	0.0192822	0.0344428	0.358722	0.458325	1.7031	1.40739	1.93107	2.28621	-0.133011	1.55722	1.69023	+	0	213.47	1404200000	125	33	33	33	1241	1241	142.66	36.2	2.81129	-1.69023	-4.69861	N1LS51	N1LS51	>tr|N1LS51|N1LS51_9BACI ATP-dependent helicase/nuclease subunit A OS=Bacillus sp. GeD10 GN=addA PE=3 SV=1	N1LS51		ATP-dependent helicase/nuclease subunit A	>tr|N1LS51|N1LS51_9BACI ATP-dependent helicase/nuclease subunit A OS=Bacillus sp. GeD10	addA
N1LS89	N1LS89		#N/A	Uncharacterized protein	EBGED10_28260	K03628		1.66439	1.57699	0.0264854		+	-1.56236	NaN	-3.23506	-1.76127	-3.19123	-0.164028	-2.31338	-0.469737	-0.331703	-0.586575	-2.43748	-0.773084	1.66439	+	0	64.783	476580000	46	8	8	8	145	145	16.465	67.6	1.57699	-1.66439	-2.80102	N1LS89	N1LS89	>tr|N1LS89|N1LS89_9BACI Uncharacterized protein OS=Bacillus sp. GeD10 GN=EBGED10_28260 PE=4 SV=1	N1LS89		Uncharacterized protein	>tr|N1LS89|N1LS89_9BACI Uncharacterized protein OS=Bacillus sp. GeD10	EBGED10_28260
	N1LH09		#N/A	Phage infection protein	EBGED10_5240	K01421		1.65981	1.86941	0.0135079		+	-0.21929	-2.10463	-0.406732	-1.33875	-1.54281	-0.730252	0.452963	0.262055	1.29027	1.41181	-1.12244	0.53737	1.65981	+	0	94.326	773270000	63	13	13	13	941	941	103.92	25.1	1.86941	-1.65981	-3.15443	N1LH09	N1LH09	>tr|N1LH09|N1LH09_9BACI Phage infection protein OS=Bacillus sp. GeD10 GN=EBGED10_5240 PE=4 SV=1	N1LH09		Phage infection protein	>tr|N1LH09|N1LH09_9BACI Phage infection protein OS=Bacillus sp. GeD10	EBGED10_5240
	N1LUZ3		bged02093	Isovaleryl-CoA dehydrogenase	EBGED10_57900	K00249		1.65284	1.7739	0.0168307		+	NaN	-3.07608	-3.05411	NaN	-2.97098	-2.54724	-1.09175	-1.09991	NaN	-0.784648	-3.03372	-1.38089	1.65284	+	0	51.817	276520000	39	4	4	4	381	381	41.601	19.2	1.7739	-1.65284	-3.52491	N1LUZ3	N1LUZ3	>tr|N1LUZ3|N1LUZ3_9BACI Isovaleryl-CoA dehydrogenase OS=Bacillus sp. GeD10 GN=EBGED10_57900 PE=3 SV=1	N1LUZ3		Isovaleryl-CoA dehydrogenase	>tr|N1LUZ3|N1LUZ3_9BACI Isovaleryl-CoA dehydrogenase OS=Bacillus sp. GeD10	EBGED10_57900
	N1LZ27		bged01744	GTP pyrophosphokinase, (P)ppGpp synthetase I	EBGED10_49980	K00951		1.65102	3.1126	0.000771611		+	0.847264	0.170838	0.584051	0.866946	0.957358	1.43419	2.29406	2.14336	2.72003	3.08991	0.685291	2.33631	1.65102	+	0	323.31	3158800000	223	34	34	34	727	727	83.992	46.5	3.1126	-1.65102	-5.25237	N1LZ27	N1LZ27	>tr|N1LZ27|N1LZ27_9BACI GTP pyrophosphokinase, (P)ppGpp synthetase I OS=Bacillus sp. GeD10 GN=EBGED10_49980 PE=3 SV=1	N1LZ27		GTP pyrophosphokinase, (P)ppGpp synthetase I	>tr|N1LZ27|N1LZ27_9BACI GTP pyrophosphokinase, (P)ppGpp synthetase I OS=Bacillus sp. GeD10	EBGED10_49980
	N1LUC8		bged00188	Isoleucine--tRNA ligase	ileS	K01870		1.64857	3.12407	0.000751497		+	1.92668	1.90994	2.33257	2.4261	2.08779	2.87742	3.86947	3.38856	4.3703	4.42016	2.13661	3.78518	1.64857	+	0	323.31	7743700000	339	41	41	41	1033	1033	118.39	67	3.12407	-1.64857	-5.27416	N1LUC8	N1LUC8	>tr|N1LUC8|N1LUC8_9BACI Isoleucine--tRNA ligase OS=Bacillus sp. GeD10 GN=ileS PE=3 SV=1	N1LUC8		Isoleucine--tRNA ligase	>tr|N1LUC8|N1LUC8_9BACI Isoleucine--tRNA ligase OS=Bacillus sp. GeD10	ileS
	N1LDJ3		bged02251	2-succinyl-5-enolpyruvyl-6-hydroxy-3-cyclohexene-1-carboxylate synthase	menD	K02551		1.63578	2.98412	0.00103724		+	-2.07925	-1.87228	-1.50969	-1.59445	-0.842466	-0.911922	0.173721	0.232744	0.256408	0.52984	-1.57963	0.056158	1.63578	+	0	86.305	691210000	51	9	9	9	584	584	65.248	24.7	2.98412	-1.63578	-5.01195	N1LDJ3	N1LDJ3	>tr|N1LDJ3|N1LDJ3_9BACI 2-succinyl-5-enolpyruvyl-6-hydroxy-3-cyclohexene-1-carboxylate synthase OS=Bacillus sp. GeD10 GN=menD PE=3 SV=1	N1LDJ3		2-succinyl-5-enolpyruvyl-6-hydroxy-3-cyclohexene-1-carboxylate synthase	>tr|N1LDJ3|N1LDJ3_9BACI 2-succinyl-5-enolpyruvyl-6-hydroxy-3-cyclohexene-1-carboxylate synthase OS=Bacillus sp. GeD10	menD
	N1LH49		bged03076	Iron-sulfur cluster assembly protein SufB	EBGED10_13880	K09014		1.6357	4.27163	5.3502e-05		+	2.95992	2.47918	2.76004	3.10456	3.03073	3.937	4.77872	4.76952	4.228	4.79968	2.86689	4.50259	1.6357	+	0	323.31	19116000000	680	38	38	38	465	465	52.523	81.3	4.27163	-1.6357	-7.77681	N1LH49	N1LH49	>tr|N1LH49|N1LH49_9BACI Iron-sulfur cluster assembly protein SufB OS=Bacillus sp. GeD10 GN=EBGED10_13880 PE=4 SV=1	N1LH49		Iron-sulfur cluster assembly protein SufB	>tr|N1LH49|N1LH49_9BACI Iron-sulfur cluster assembly protein SufB OS=Bacillus sp. GeD10	EBGED10_13880
	N1LTT7		bged01594	3-isopropylmalate dehydratase large subunit	leuC	K01703		1.62647	2.75461	0.0017595		+	-1.91437	-2.27372	-1.54711	-2.07432	-1.44404	-1.35304	-0.254399	0.385763	-0.276806	0.377242	-1.85071	-0.224247	1.62647	+	0	66.612	774220000	59	9	9	9	464	464	51.351	31.9	2.75461	-1.62647	-4.59824	N1LTT7	N1LTT7	>tr|N1LTT7|N1LTT7_9BACI 3-isopropylmalate dehydratase large subunit OS=Bacillus sp. GeD10 GN=leuC PE=3 SV=1	N1LTT7		3-isopropylmalate dehydratase large subunit	>tr|N1LTT7|N1LTT7_9BACI 3-isopropylmalate dehydratase large subunit OS=Bacillus sp. GeD10	leuC
	N1LPD2		bged00790	Tryptophan 2,3-dioxygenase	kynA	K00453		1.61779	1.51582	0.0304915		+	-0.46768	-0.23526	-0.297042	0.71986	0.202916	-0.537931	1.48558	1.86702	2.46371	2.73336	-0.0154411	1.60235	1.61779	+	0	323.31	3803600000	114	13	13	13	279	279	32.757	62.7	1.51582	-1.61779	-2.62335	N1LPD2	N1LPD2	>tr|N1LPD2|N1LPD2_9BACI Tryptophan 2,3-dioxygenase OS=Bacillus sp. GeD10 GN=kynA PE=3 SV=1	N1LPD2		Tryptophan 2,3-dioxygenase	>tr|N1LPD2|N1LPD2_9BACI Tryptophan 2,3-dioxygenase OS=Bacillus sp. GeD10	kynA
	N1LW19		bged02583	Thioredoxin reductase	EBGED10_38830	K00384		1.60636	2.78674	0.00163404		+	-1.80028	-1.61754	-1.33574	-1.07787	-0.969078	-0.0968045	-0.711435	0.615674	0.335479	1.08839	-1.3601	0.24626	1.60636	+	0	122.55	1007500000	56	12	12	12	326	326	36.447	62.6	2.78674	-1.60636	-4.65499	N1LW19	N1LW19	>tr|N1LW19|N1LW19_9BACI Thioredoxin reductase OS=Bacillus sp. GeD10 GN=EBGED10_38830 PE=4 SV=1	N1LW19		Thioredoxin reductase	>tr|N1LW19|N1LW19_9BACI Thioredoxin reductase OS=Bacillus sp. GeD10	EBGED10_38830
	N1LX56		bged01950	Excinuclease ABC subunit A domain protein	EBGED10_60210	K03701		1.59654	1.84831	0.0141803		+	-2.54305	-2.14191	-1.35498	-0.952516	-1.22925	-1.29546	-0.253537	-0.421256	0.738325	0.992915	-1.64434	-0.0478017	1.59654	+	0	184.49	535440000	48	18	18	18	1056	1056	120.44	24.1	1.84831	-1.59654	-3.12225	N1LX56	N1LX56	>tr|N1LX56|N1LX56_9BACI Excinuclease ABC subunit A domain protein OS=Bacillus sp. GeD10 GN=EBGED10_60210 PE=4 SV=1	N1LX56		Excinuclease ABC subunit A domain protein	>tr|N1LX56|N1LX56_9BACI Excinuclease ABC subunit A domain protein OS=Bacillus sp. GeD10	EBGED10_60210
	N1LTM3		bged02533	Long-chain-fatty-acid--CoA ligase	EBGED10_30230	K16093		1.57832	2.63304	0.00232788		+	2.54797	3.19531	3.34177	3.31153	3.5834	4.25676	4.75449	3.92741	5.32346	5.60944	3.196	4.77431	1.57832	+	0	323.31	13616000000	733	101	101	101	2533	2533	291.99	52.6	2.63304	-1.57832	-4.38668	N1LTM3	N1LTM3	>tr|N1LTM3|N1LTM3_9BACI Long-chain-fatty-acid--CoA ligase OS=Bacillus sp. GeD10 GN=EBGED10_30230 PE=4 SV=1	N1LTM3		Long-chain-fatty-acid--CoA ligase	>tr|N1LTM3|N1LTM3_9BACI Long-chain-fatty-acid--CoA ligase OS=Bacillus sp. GeD10	EBGED10_30230
	N1LL63		bged02534	Long-chain-fatty-acid--CoA ligase	EBGED10_3730	K01897		1.57628	2.91623	0.00121275		+	-2.03571	-1.65017	-1.34776	-1.3862	-1.40391	-1.15589	0.390532	0.413917	0.163308	0.245797	-1.56475	0.0115335	1.57628	+	0	76.053	719320000	54	9	9	9	510	510	56.386	34.3	2.91623	-1.57628	-4.88753	N1LL63	N1LL63	>tr|N1LL63|N1LL63_9BACI Long-chain-fatty-acid--CoA ligase OS=Bacillus sp. GeD10 GN=EBGED10_3730 PE=4 SV=1	N1LL63		Long-chain-fatty-acid--CoA ligase	>tr|N1LL63|N1LL63_9BACI Long-chain-fatty-acid--CoA ligase OS=Bacillus sp. GeD10	EBGED10_3730
	N1LG57		bged01188	Fumarate hydratase class I, aerobic	EBGED10_4560	K01676		1.57133	3.76078	0.000173467		+	2.47892	2.63582	2.48409	2.61901	2.74914	3.28312	4.65695	4.31885	4.37934	4.18537	2.5934	4.16473	1.57133	+	0	323.31	13506000000	397	25	25	25	506	506	55.951	66.6	3.76078	-1.57133	-6.57719	N1LG57	N1LG57	>tr|N1LG57|N1LG57_9BACI Fumarate hydratase class I, aerobic OS=Bacillus sp. GeD10 GN=EBGED10_4560 PE=4 SV=1	N1LG57		Fumarate hydratase class I, aerobic	>tr|N1LG57|N1LG57_9BACI Fumarate hydratase class I, aerobic OS=Bacillus sp. GeD10	EBGED10_4560
	N1LE13		bged00607	Glutamate synthase [NADPH] large chain	EBGED10_4100	K00265		1.55974	2.86907	0.00135184		+	2.81752	3.12142	3.37981	3.43389	3.60785	4.06217	4.83268	4.30616	5.37069	5.58747	3.2721	4.83183	1.55974	+	0	323.31	15749000000	818	79	79	79	1478	1478	162.68	69.8	2.86907	-1.55974	-4.80214	N1LE13	N1LE13	>tr|N1LE13|N1LE13_9BACI Glutamate synthase [NADPH] large chain OS=Bacillus sp. GeD10 GN=EBGED10_4100 PE=4 SV=1	N1LE13		Glutamate synthase [NADPH] large chain	>tr|N1LE13|N1LE13_9BACI Glutamate synthase [NADPH] large chain OS=Bacillus sp. GeD10	EBGED10_4100
	N1LLL5		bged00686	2-oxoglutarate dehydrogenase E1 component	odhA	K00164		1.55928	3.20574	0.00062268		+	4.71919	4.38988	4.29822	4.65674	4.66617	5.1375	6.15395	5.99263	6.51618	6.72634	4.54604	6.10532	1.55928	+	0	323.31	53451000000	1201	51	51	51	955	955	106.44	73.3	3.20574	-1.55928	-5.43089	N1LLL5	N1LLL5	>tr|N1LLL5|N1LLL5_9BACI 2-oxoglutarate dehydrogenase E1 component OS=Bacillus sp. GeD10 GN=odhA PE=3 SV=1	N1LLL5		2-oxoglutarate dehydrogenase E1 component	>tr|N1LLL5|N1LLL5_9BACI 2-oxoglutarate dehydrogenase E1 component OS=Bacillus sp. GeD10	odhA
	N1LQH3		bged03355	Transcriptional regulator/TPR domain protein	EBGED10_42100	K06359		1.55852	1.84728	0.014214		+	-0.286774	1.55862	1.82641	2.25238	2.19558	2.74262	2.64364	3.03891	3.61031	3.30332	1.50924	3.06776	1.55852	+	0	316.14	4400600000	150	22	22	22	423	423	50.674	44.9	1.84728	-1.55852	-3.12068	N1LQH3	N1LQH3	>tr|N1LQH3|N1LQH3_9BACI Transcriptional regulator/TPR domain protein OS=Bacillus sp. GeD10 GN=EBGED10_42100 PE=4 SV=1	N1LQH3		Transcriptional regulator/TPR domain protein	>tr|N1LQH3|N1LQH3_9BACI Transcriptional regulator/TPR domain protein OS=Bacillus sp. GeD10	EBGED10_42100
	N1LW70		bged02612	Predicted ATPase related to phosphate starvation-inducible protein PhoH	EBGED10_55640	K07175		1.54334	1.90338	0.0124917		+	-3.1712	-2.2091	-1.3327	-1.19797	-1.4995	NaN	-0.245249	0.161639	-0.95921	-0.312201	-1.88209	-0.338755	1.54334	+	0	133.14	765960000	32	5	5	5	442	442	49.971	14.9	1.90338	-1.54334	-3.33578	N1LW70	N1LW70	>tr|N1LW70|N1LW70_9BACI Predicted ATPase related to phosphate starvation-inducible protein PhoH OS=Bacillus sp. GeD10 GN=EBGED10_55640 PE=4 SV=1	N1LW70		Predicted ATPase related to phosphate starvation-inducible protein PhoH	>tr|N1LW70|N1LW70_9BACI Predicted ATPase related to phosphate starvation-inducible protein PhoH OS=Bacillus sp. GeD10	EBGED10_55640
	N1M053		#N/A	Protein YicC	EBGED10_56420	K02902		1.54311	2.47113	0.00337967		+	-3.48749	-2.21388	-2.18967	-1.90335	-2.25445	-0.453703	-1.63716	-0.554761	-0.38303	-1.30463	-2.40977	-0.866657	1.54311	+	0	25.64	384450000	41	7	7	7	291	291	34.14	26.8	2.47113	-1.54311	-4.11235	N1M053	N1M053	>tr|N1M053|N1M053_9BACI Protein YicC OS=Bacillus sp. GeD10 GN=EBGED10_56420 PE=4 SV=1	N1M053		Protein YicC	>tr|N1M053|N1M053_9BACI Protein YicC OS=Bacillus sp. GeD10	EBGED10_56420
	N1LX07		bged00544	Bis(5-nucleosyl)-tetraphosphatase PrpE [asymmetrical]	prpE	K01090		1.54167	3.95128	0.000111872		+	NaN	-0.702566	-0.548852	-0.563523	NaN	0.823139	NaN	1.19555	1.04562	0.682443	-0.60498	0.936689	1.54167	+	0	18.322	526650000	19	3	3	3	246	246	28.192	19.1	3.95128	-1.54167	-10.9211	N1LX07	N1LX07	>tr|N1LX07|N1LX07_9BACI Bis(5-nucleosyl)-tetraphosphatase PrpE [asymmetrical] OS=Bacillus sp. GeD10 GN=prpE PE=3 SV=1	N1LX07		Bis(5-nucleosyl)-tetraphosphatase PrpE [asymmetrical]	>tr|N1LX07|N1LX07_9BACI Bis(5-nucleosyl)-tetraphosphatase PrpE [asymmetrical] OS=Bacillus sp. GeD10	prpE
	N1LW37		bged01367	Polyphosphate kinase	ppk	K00937		1.53109	2.7764	0.0016734		+	-1.1262	-0.174386	-0.35068	0.216349	0.295501	0.631837	1.19701	1.20824	1.61119	1.86775	-0.227883	1.3032	1.53109	+	0	176.57	1283300000	113	24	24	24	702	702	80.778	45.6	2.7764	-1.53109	-4.63669	N1LW37	N1LW37	>tr|N1LW37|N1LW37_9BACI Polyphosphate kinase OS=Bacillus sp. GeD10 GN=ppk PE=3 SV=1	N1LW37		Polyphosphate kinase	>tr|N1LW37|N1LW37_9BACI Polyphosphate kinase OS=Bacillus sp. GeD10	ppk
	N1LMV7		bged03227	DNTP triphosphohydrolase, putative	EBGED10_28100	K06885		1.51787	2.12758	0.00745456		+	NaN	-3.16927	-2.70422	-2.43983	-2.69606	-2.25605	-1.74726	-0.545239	-1.10678	-0.517054	-2.75235	-1.23448	1.51787	+	0	35.504	372670000	35	10	10	10	434	434	51.583	23.7	2.12758	-1.51787	-3.72016	N1LMV7	N1LMV7	>tr|N1LMV7|N1LMV7_9BACI DNTP triphosphohydrolase, putative OS=Bacillus sp. GeD10 GN=EBGED10_28100 PE=4 SV=1	N1LMV7		DNTP triphosphohydrolase, putative	>tr|N1LMV7|N1LMV7_9BACI DNTP triphosphohydrolase, putative OS=Bacillus sp. GeD10	EBGED10_28100
	N1LWS2		bged00168	ATP-dependent helicase/deoxyribonuclease subunit B	addB	K16899		1.51431	2.63196	0.00233367		+	-1.44843	-1.88895	-1.15137	-1.41974	-1.25449	-1.03802	-0.0426383	0.181091	0.397568	0.910551	-1.4326	0.0817103	1.51431	+	0	152.56	507950000	57	16	16	16	1171	1171	134.14	17.9	2.63196	-1.51431	-4.38482	N1LWS2	N1LWS2	>tr|N1LWS2|N1LWS2_9BACI ATP-dependent helicase/deoxyribonuclease subunit B OS=Bacillus sp. GeD10 GN=addB PE=3 SV=1	N1LWS2		ATP-dependent helicase/deoxyribonuclease subunit B	>tr|N1LWS2|N1LWS2_9BACI ATP-dependent helicase/deoxyribonuclease subunit B OS=Bacillus sp. GeD10	addB
	N1M091		bged02247	DNA topoisomerase 1	topA	K03168		1.50401	3.75468	0.00017592		+	1.70819	1.55065	1.44161	1.47517	1.95316	2.73778	2.71392	2.99328	3.39848	3.80539	1.62576	3.12977	1.50401	+	0	323.31	5537500000	272	34	34	34	692	692	79.108	57.2	3.75468	-1.50401	-6.56376	N1M091	N1M091	>tr|N1M091|N1M091_9BACI DNA topoisomerase 1 OS=Bacillus sp. GeD10 GN=topA PE=3 SV=1	N1M091		DNA topoisomerase 1	>tr|N1M091|N1M091_9BACI DNA topoisomerase 1 OS=Bacillus sp. GeD10	topA
	N1LMF2		bged01997	2-methylcitrate dehydratase	EBGED10_11700	K01720		1.50254	4.08459	8.23021e-05		+	0.633633	0.751091	1.09285	1.15489	1.09985	1.79958	2.54255	2.53076	2.50068	2.87142	0.946463	2.449	1.50254	+	0	323.31	4448900000	325	30	30	30	478	478	53.396	73.4	4.08459	-1.50254	-7.31976	N1LMF2	N1LMF2	>tr|N1LMF2|N1LMF2_9BACI 2-methylcitrate dehydratase OS=Bacillus sp. GeD10 GN=EBGED10_11700 PE=4 SV=1	N1LMF2		2-methylcitrate dehydratase	>tr|N1LMF2|N1LMF2_9BACI 2-methylcitrate dehydratase OS=Bacillus sp. GeD10	EBGED10_11700
	N1LUD3		bged00005	Alanine--tRNA ligase	alaS	K01872		1.49237	3.27805	0.000527166		+	4.29118	4.4327	4.23558	4.30068	4.36677	4.79087	5.99296	5.8685	6.2575	6.17895	4.32538	5.81776	1.49237	+	0	323.31	38007000000	823	53	53	53	880	880	97.458	73.6	3.27805	-1.49237	-5.57207	N1LUD3	N1LUD3	>tr|N1LUD3|N1LUD3_9BACI Alanine--tRNA ligase OS=Bacillus sp. GeD10 GN=alaS PE=3 SV=1	N1LUD3		Alanine--tRNA ligase	>tr|N1LUD3|N1LUD3_9BACI Alanine--tRNA ligase OS=Bacillus sp. GeD10	alaS
	N1LV93		bged01327	L-asparaginase	EBGED10_38820	K01424		1.48371	3.36352	0.000432992		+	-2.1888	-1.67522	-2.08257	-1.02703	-1.45561	-0.0341908	-0.68985	0.166661	-0.358199	-0.0950759	-1.68584	-0.202131	1.48371	+	0	90.708	544740000	45	7	7	7	310	310	33.943	39.4	3.36352	-1.48371	-5.74192	N1LV93	N1LV93	>tr|N1LV93|N1LV93_9BACI L-asparaginase OS=Bacillus sp. GeD10 GN=EBGED10_38820 PE=4 SV=1	N1LV93		L-asparaginase	>tr|N1LV93|N1LV93_9BACI L-asparaginase OS=Bacillus sp. GeD10	EBGED10_38820
	N1LKU2		bged02481	tRNA N6-adenosine threonylcarbamoyltransferase	tsaD	K01409		1.48014	3.56869	0.000269969		+	-4.03234	-3.87289	-3.89039	-3.69757	-3.17497	NaN	-2.57398	-2.46226	-2.08767	-1.89004	-3.73363	-2.25349	1.48014	+	0	37.939	230480000	24	9	9	9	338	338	36.028	42.6	3.56869	-1.48014	-6.72974	N1LKU2	N1LKU2	>tr|N1LKU2|N1LKU2_9BACI tRNA N6-adenosine threonylcarbamoyltransferase OS=Bacillus sp. GeD10 GN=tsaD PE=3 SV=1	N1LKU2		tRNA N6-adenosine threonylcarbamoyltransferase	>tr|N1LKU2|N1LKU2_9BACI tRNA N6-adenosine threonylcarbamoyltransferase OS=Bacillus sp. GeD10	tsaD
	N1LIN3		bged00244	UvrABC system protein B	uvrB	K03702		1.47961	3.12889	0.000743202		+	-0.247053	0.478306	0.338647	0.571043	0.894086	1.40817	1.6935	1.98026	1.71463	2.6365	0.407006	1.88661	1.47961	+	0	157.54	2205900000	91	21	21	21	658	658	75.08	38.4	3.12889	-1.47961	-5.28334	N1LIN3	N1LIN3	>tr|N1LIN3|N1LIN3_9BACI UvrABC system protein B OS=Bacillus sp. GeD10 GN=uvrB PE=3 SV=1	N1LIN3		UvrABC system protein B	>tr|N1LIN3|N1LIN3_9BACI UvrABC system protein B OS=Bacillus sp. GeD10	uvrB
	N1LK63		bged00167	Transcription-repair-coupling factor	mfd	K03723		1.47867	2.8367	0.00145645		+	2.53522	2.93466	3.28777	3.19389	3.21294	3.58071	4.51254	4.31415	5.17905	4.97138	3.0329	4.51157	1.47867	+	0	323.31	12202000000	571	70	70	70	1176	1176	133.97	64.5	2.8367	-1.47867	-4.744	N1LK63	N1LK63	>tr|N1LK63|N1LK63_9BACI Transcription-repair-coupling factor OS=Bacillus sp. GeD10 GN=mfd PE=3 SV=1	N1LK63		Transcription-repair-coupling factor	>tr|N1LK63|N1LK63_9BACI Transcription-repair-coupling factor OS=Bacillus sp. GeD10	mfd
	N1LW95		bged01417	ACT domain protein	EBGED10_57310	#N/A		1.47794	2.33917	0.00457961		+	-3.60547	-3.04471	-2.61802	-2.34303	-2.21832	NaN	-1.58431	-0.567064	-1.64452	-1.356	-2.76591	-1.28797	1.47794	+	0	44.218	416050000	21	9	9	9	261	261	30.416	47.1	2.33917	-1.47794	-4.09886	N1LW95	N1LW95	>tr|N1LW95|N1LW95_9BACI ACT domain protein OS=Bacillus sp. GeD10 GN=EBGED10_57310 PE=4 SV=1	N1LW95		ACT domain protein	>tr|N1LW95|N1LW95_9BACI ACT domain protein OS=Bacillus sp. GeD10	EBGED10_57310
	N1LMN1		bged03123	NAD(P)H-flavin oxidoreductase	EBGED10_32150	K00540		1.46864	2.23996	0.00575489		+	NaN	-2.36759	-2.30811	NaN	NaN	-1.11772	-1.26564	-0.439573	-0.377803	-1.1453	-2.33785	-0.869207	1.46864	+	0	58.822	579600000	20	6	6	6	244	244	27.756	46.7	2.23996	-1.46864	-4.61625	N1LMN1	N1LMN1	>tr|N1LMN1|N1LMN1_9BACI NAD(P)H-flavin oxidoreductase OS=Bacillus sp. GeD10 GN=EBGED10_32150 PE=4 SV=1	N1LMN1		NAD(P)H-flavin oxidoreductase	>tr|N1LMN1|N1LMN1_9BACI NAD(P)H-flavin oxidoreductase OS=Bacillus sp. GeD10	EBGED10_32150
	N1LJG0		bged01142	PTS system, trehalose-specific IIB component / PTS system, trehalose-specific IIC component	EBGED10_16140	K02818		1.46795	1.81657	0.0152555		+	1.14801	-1.33624	-0.0804649	-0.792178	-0.987626	0.590848	0.7313	1.10467	1.23214	1.6323	-0.409701	1.05825	1.46795	+	0	158.76	1128200000	94	8	8	8	475	475	51.019	22.3	1.81657	-1.46795	-3.07398	N1LJG0	N1LJG0	>tr|N1LJG0|N1LJG0_9BACI PTS system, trehalose-specific IIB component / PTS system, trehalose-specific IIC component OS=Bacillus sp. GeD10 GN=EBGED10_16140 PE=4 SV=1	N1LJG0		PTS system, trehalose-specific IIB component / PTS system, trehalose-specific IIC component	>tr|N1LJG0|N1LJG0_9BACI PTS system, trehalose-specific IIB component / PTS system, trehalose-specific IIC component OS=Bacillus sp. GeD10	EBGED10_16140
	N1LZL6		bged02415	Acetyl-coenzyme A synthetase	EBGED10_54220	K01895		1.4668	2.53963	0.00288649		+	0.277547	0.709527	1.00935	0.755581	1.05422	1.08549	2.95728	2.51492	2.07192	2.51062	0.761246	2.22805	1.4668	+	0	159.73	3690600000	201	17	17	17	572	572	64.323	39.3	2.53963	-1.4668	-4.22742	N1LZL6	N1LZL6	>tr|N1LZL6|N1LZL6_9BACI Acetyl-coenzyme A synthetase OS=Bacillus sp. GeD10 GN=EBGED10_54220 PE=4 SV=1	N1LZL6		Acetyl-coenzyme A synthetase	>tr|N1LZL6|N1LZL6_9BACI Acetyl-coenzyme A synthetase OS=Bacillus sp. GeD10	EBGED10_54220
	N1LRA0		bged03226	Alpha/beta hydrolase	EBGED10_39860	#N/A		1.46553	2.10335	0.0078823		+	-2.27415	-1.58022	-1.12583	-1.44948	-0.68217	-1.24239	0.246276	0.3799	0.396362	0.43563	-1.42237	0.0431567	1.46553	+	0	256.3	1380500000	65	10	10	10	314	314	36.783	52.9	2.10335	-1.46553	-3.51684	N1LRA0	N1LRA0	>tr|N1LRA0|N1LRA0_9BACI Alpha/beta hydrolase OS=Bacillus sp. GeD10 GN=EBGED10_39860 PE=4 SV=1	N1LRA0		Alpha/beta hydrolase	>tr|N1LRA0|N1LRA0_9BACI Alpha/beta hydrolase OS=Bacillus sp. GeD10	EBGED10_39860
	N1LRJ3		bged00693	Phosphoenolpyruvate carboxykinase [ATP]	pckA	K01610		1.45207	3.49753	0.000318034		+	2.07951	2.06531	2.66983	2.31502	2.33571	2.93402	4.15634	3.97885	3.70915	3.94737	2.29308	3.74514	1.45207	+	0	323.31	10800000000	311	24	24	24	528	528	57.879	70.5	3.49753	-1.45207	-6.01501	N1LRJ3	N1LRJ3	>tr|N1LRJ3|N1LRJ3_9BACI Phosphoenolpyruvate carboxykinase [ATP] OS=Bacillus sp. GeD10 GN=pckA PE=3 SV=1	N1LRJ3		Phosphoenolpyruvate carboxykinase [ATP]	>tr|N1LRJ3|N1LRJ3_9BACI Phosphoenolpyruvate carboxykinase [ATP] OS=Bacillus sp. GeD10	pckA
	N1LH35		bged00936	Pyridine nucleotide-disulfide oxidoreductase NADH dehydrogenase	EBGED10_5590	K18367		1.45061	2.70283	0.00198232		+	-0.393141	-1.37519	-1.2616	-0.42864	-0.949795	0.00300071	-0.00789473	1.23178	0.691887	0.925913	-0.881675	0.568936	1.45061	+	0	211.32	1727000000	87	13	13	13	444	444	49.554	36.7	2.70283	-1.45061	-4.50751	N1LH35	N1LH35	>tr|N1LH35|N1LH35_9BACI Pyridine nucleotide-disulfide oxidoreductase NADH dehydrogenase OS=Bacillus sp. GeD10 GN=EBGED10_5590 PE=4 SV=1	N1LH35		Pyridine nucleotide-disulfide oxidoreductase NADH dehydrogenase	>tr|N1LH35|N1LH35_9BACI Pyridine nucleotide-disulfide oxidoreductase NADH dehydrogenase OS=Bacillus sp. GeD10	EBGED10_5590
	N1LUJ7		#N/A	Fibronectin/fibrinogen-binding protein	EBGED10_56400	#N/A		1.45004	3.68791	0.000205158		+	-0.603336	-0.515923	0.0205588	-0.295461	0.226923	0.749725	1.06493	1.31333	1.21527	1.73973	-0.233448	1.2166	1.45004	+	0	232.22	1672000000	119	23	23	23	569	569	64.887	56.4	3.68791	-1.45004	-6.41803	N1LUJ7	N1LUJ7	>tr|N1LUJ7|N1LUJ7_9BACI Fibronectin/fibrinogen-binding protein OS=Bacillus sp. GeD10 GN=EBGED10_56400 PE=4 SV=1	N1LUJ7		Fibronectin/fibrinogen-binding protein	>tr|N1LUJ7|N1LUJ7_9BACI Fibronectin/fibrinogen-binding protein OS=Bacillus sp. GeD10	EBGED10_56400
	N1LQ64		bged00247	DNA gyrase subunit A	gyrA	K02469		1.44429	3.98461	0.000103607		+	2.74756	2.94939	3.00061	3.22415	3.18251	3.99502	4.28071	4.31776	4.6595	5.0727	3.02084	4.46514	1.44429	+	0	323.31	14256000000	635	51	51	51	823	823	92.445	62.6	3.98461	-1.44429	-7.08412	N1LQ64	N1LQ64	>tr|N1LQ64|N1LQ64_9BACI DNA gyrase subunit A OS=Bacillus sp. GeD10 GN=gyrA PE=3 SV=1	N1LQ64		DNA gyrase subunit A	>tr|N1LQ64|N1LQ64_9BACI DNA gyrase subunit A OS=Bacillus sp. GeD10	gyrA
	N1LPY5		bged03150	Glycosyl transferase domain protein	EBGED10_17260	K00786		1.43625	2.16712	0.00680575		+	-1.9708	-2.24444	-2.63575	NaN	-1.93429	NaN	-0.625373	-1.67802	-0.23718	-0.499699	-2.19632	-0.760068	1.43625	+	0	61.416	561930000	30	7	7	7	242	242	27.416	38	2.16712	-1.43625	-4.03961	N1LPY5	N1LPY5	>tr|N1LPY5|N1LPY5_9BACI Glycosyl transferase domain protein OS=Bacillus sp. GeD10 GN=EBGED10_17260 PE=4 SV=1	N1LPY5		Glycosyl transferase domain protein	>tr|N1LPY5|N1LPY5_9BACI Glycosyl transferase domain protein OS=Bacillus sp. GeD10	EBGED10_17260
N1LM80	N1LM80		#N/A	Uncharacterized protein	EBGED10_7740	#N/A		1.43613	1.90727	0.0123804		+	NaN	-2.72908	-1.96037	NaN	-2.69615	-1.36396	-1.71838	-1.2309	-0.201516	-0.613944	-2.46187	-1.02574	1.43613	+	0	32.684	318650000	22	6	6	6	124	124	14.774	66.9	1.90727	-1.43613	-3.52915	N1LM80	N1LM80	>tr|N1LM80|N1LM80_9BACI Uncharacterized protein OS=Bacillus sp. GeD10 GN=EBGED10_7740 PE=4 SV=1	N1LM80		Uncharacterized protein	>tr|N1LM80|N1LM80_9BACI Uncharacterized protein OS=Bacillus sp. GeD10	EBGED10_7740
	N1LVN1		bged02393	D-beta-hydroxybutyrate dehydrogenase	EBGED10_54810	K00019		1.42848	2.41901	0.00381053		+	-2.4648	-2.23186	-1.90676	-2.43859	-2.47023	-2.14345	-0.76793	-0.115364	-0.712279	-0.630821	-2.30245	-0.873969	1.42848	+	0	114.23	755610000	73	10	10	10	258	258	27.849	55.4	2.41901	-1.42848	-4.02575	N1LVN1	N1LVN1	>tr|N1LVN1|N1LVN1_9BACI D-beta-hydroxybutyrate dehydrogenase OS=Bacillus sp. GeD10 GN=EBGED10_54810 PE=3 SV=1	N1LVN1		D-beta-hydroxybutyrate dehydrogenase	>tr|N1LVN1|N1LVN1_9BACI D-beta-hydroxybutyrate dehydrogenase OS=Bacillus sp. GeD10	EBGED10_54810
	N1M0X9		bged02338	DNA polymerase III PolC-type	polC	K03763		1.42813	2.34436	0.0045252		+	0.740859	0.888923	1.24389	1.29517	1.84558	1.82369	2.58876	2.08117	3.27018	3.39126	1.20288	2.63101	1.42813	+	0	323.31	3087700000	249	46	46	46	1433	1433	161.68	47.9	2.34436	-1.42813	-3.90304	N1M0X9	N1M0X9	>tr|N1M0X9|N1M0X9_9BACI DNA polymerase III PolC-type OS=Bacillus sp. GeD10 GN=polC PE=3 SV=1	N1M0X9		DNA polymerase III PolC-type	>tr|N1M0X9|N1M0X9_9BACI DNA polymerase III PolC-type OS=Bacillus sp. GeD10	polC
	N1LGY3		bged00158	DNA topoisomerase 4 subunit B	parE	K02622		1.41892	2.17851	0.00662957		+	0.591841	-0.151435	0.305359	0.62364	0.44684	0.648592	1.34336	2.07764	2.05267	2.78858	0.363249	1.78217	1.41892	+	0	323.31	3319900000	175	26	26	26	654	654	72.936	49.8	2.17851	-1.41892	-3.63575	N1LGY3	N1LGY3	>tr|N1LGY3|N1LGY3_9BACI DNA topoisomerase 4 subunit B OS=Bacillus sp. GeD10 GN=parE PE=3 SV=1	N1LGY3		DNA topoisomerase 4 subunit B	>tr|N1LGY3|N1LGY3_9BACI DNA topoisomerase 4 subunit B OS=Bacillus sp. GeD10	parE
	N1LUR9		bged00953	Ribonuclease R	rnr	K12573		1.40831	4.51154	3.07935e-05		+	2.63287	2.56651	2.3339	2.74932	2.77732	4.00173	3.73647	3.69102	4.18143	4.49083	2.61198	4.0203	1.40831	+	0	323.31	10237000000	460	42	42	42	812	812	92.379	55.9	4.51154	-1.40831	-8.3959	N1LUR9	N1LUR9	>tr|N1LUR9|N1LUR9_9BACI Ribonuclease R OS=Bacillus sp. GeD10 GN=rnr PE=3 SV=1	N1LUR9		Ribonuclease R	>tr|N1LUR9|N1LUR9_9BACI Ribonuclease R OS=Bacillus sp. GeD10	rnr
	N1LZK8		bged01686	2,4-dienoyl-CoA reductase [NADPH]	EBGED10_52280	K10680		1.40244	2.292	0.00510502		+	-1.38413	0.131832	0.243992	0.0343194	0.144211	0.490969	1.20122	1.69856	1.40877	1.38289	-0.165956	1.23648	1.40244	+	0	323.31	3299600000	142	20	20	20	375	375	41.496	70.9	2.292	-1.40244	-3.81789	N1LZK8	N1LZK8	>tr|N1LZK8|N1LZK8_9BACI 2,4-dienoyl-CoA reductase [NADPH] OS=Bacillus sp. GeD10 GN=EBGED10_52280 PE=4 SV=1	N1LZK8		2,4-dienoyl-CoA reductase [NADPH]	>tr|N1LZK8|N1LZK8_9BACI 2,4-dienoyl-CoA reductase [NADPH] OS=Bacillus sp. GeD10	EBGED10_52280
	N1LVL8		bged01144	PTS system, N-acetylglucosamine-specific IIA component / PTS system,N-acetylglucosamine-specific IIB component / PTS system, N-acetylglucosamine-specific IIC component	EBGED10_54610	K02763		1.40098	2.36784	0.00428711		+	3.2499	3.03981	3.27937	2.8326	3.7353	3.85689	4.61423	3.96917	5.32945	5.37214	3.2274	4.62838	1.40098	+	0	323.31	12770000000	472	32	32	32	687	687	74.107	49.9	2.36784	-1.40098	-3.94146	N1LVL8	N1LVL8	>tr|N1LVL8|N1LVL8_9BACI PTS system, N-acetylglucosamine-specific IIA component / PTS system,N-acetylglucosamine-specific IIB component / PTS system, N-acetylglucosamine-specific IIC component OS=Bacillus sp. GeD10 GN=EBGED10_54610 PE=4 SV=1	N1LVL8		PTS system, N-acetylglucosamine-specific IIA component / PTS system,N-acetylglucosamine-specific IIB component / PTS system, N-acetylglucosamine-specific IIC component	>tr|N1LVL8|N1LVL8_9BACI PTS system, N-acetylglucosamine-specific IIA component / PTS system,N-acetylglucosamine-specific IIB component / PTS system, N-acetylglucosamine-specific IIC component OS=Bacillus sp. GeD10	EBGED10_54610
	N1LRG5		bged00185	Nucleoside permease	EBGED10_45350	K03317		1.39921	1.56264	0.0273754		+	-1.40272	NaN	-1.47334	-1.57793	-1.45734	-0.665189	-0.962965	-0.714334	0.673929	1.27543	-1.47783	-0.0786256	1.39921	+	0	145.43	448000000	31	7	7	7	403	403	42.628	18.6	1.56264	-1.39921	-2.77804	N1LRG5	N1LRG5	>tr|N1LRG5|N1LRG5_9BACI Nucleoside permease OS=Bacillus sp. GeD10 GN=EBGED10_45350 PE=3 SV=1	N1LRG5		Nucleoside permease	>tr|N1LRG5|N1LRG5_9BACI Nucleoside permease OS=Bacillus sp. GeD10	EBGED10_45350
	N1LUZ5		bged02936	Similarity with glutathionylspermidine synthase, group 2	EBGED10_37920	K01917		1.39745	2.91569	0.00121426		+	-3.80975	-3.58201	-3.48115	NaN	-3.78418	-3.14569	-2.16826	-1.95845	-1.87798	-2.18375	-3.66427	-2.26683	1.39745	+	0	4.8748	159140000	20	2	2	2	412	412	47.217	6.1	2.91569	-1.39745	-5.22864	N1LUZ5	N1LUZ5	>tr|N1LUZ5|N1LUZ5_9BACI Similarity with glutathionylspermidine synthase, group 2 OS=Bacillus sp. GeD10 GN=EBGED10_37920 PE=4 SV=1	N1LUZ5		Similarity with glutathionylspermidine synthase, group 2	>tr|N1LUZ5|N1LUZ5_9BACI Similarity with glutathionylspermidine synthase, group 2 OS=Bacillus sp. GeD10	EBGED10_37920
	N1LVY9		bged00187	Isoleucine--tRNA ligase	ileS	K01870		1.39422	3.82603	0.000149268		+	5.28244	5.30412	5.15243	5.2085	5.24702	6.10873	6.35311	6.4775	7.05256	7.17368	5.2389	6.63312	1.39422	+	0	323.31	63233000000	1342	71	71	71	921	921	104.56	73.4	3.82603	-1.39422	-6.72211	N1LVY9	N1LVY9	>tr|N1LVY9|N1LVY9_9BACI Isoleucine--tRNA ligase OS=Bacillus sp. GeD10 GN=ileS PE=3 SV=1	N1LVY9		Isoleucine--tRNA ligase	>tr|N1LVY9|N1LVY9_9BACI Isoleucine--tRNA ligase OS=Bacillus sp. GeD10	ileS
	N1LRU7		bged03308	Amidase family protein	EBGED10_40640	K01426		1.38739	3.65618	0.000220709		+	-2.05918	-1.88059	-1.73518	-1.05275	-1.7526	NaN	-0.18105	-0.432453	-0.269639	-0.351557	-1.69606	-0.308675	1.38739	+	0	115.13	640440000	47	8	8	8	491	491	54.121	22	3.65618	-1.38739	-6.95245	N1LRU7	N1LRU7	>tr|N1LRU7|N1LRU7_9BACI Amidase family protein OS=Bacillus sp. GeD10 GN=EBGED10_40640 PE=4 SV=1	N1LRU7		Amidase family protein	>tr|N1LRU7|N1LRU7_9BACI Amidase family protein OS=Bacillus sp. GeD10	EBGED10_40640
	N1LHI3		bged00614	Dihydroxyacetone kinase, ATP-dependent	EBGED10_9280	K00863		1.38319	2.24911	0.00563496		+	1.09877	1.35986	1.23646	1.02924	1.25022	1.18915	2.68787	2.74899	2.94555	3.31891	1.19491	2.57809	1.38319	+	0	257.43	4639700000	155	15	15	15	583	583	62.514	49.7	2.24911	-1.38319	-3.74867	N1LHI3	N1LHI3	>tr|N1LHI3|N1LHI3_9BACI Dihydroxyacetone kinase, ATP-dependent OS=Bacillus sp. GeD10 GN=EBGED10_9280 PE=4 SV=1	N1LHI3		Dihydroxyacetone kinase, ATP-dependent	>tr|N1LHI3|N1LHI3_9BACI Dihydroxyacetone kinase, ATP-dependent OS=Bacillus sp. GeD10	EBGED10_9280
	N1LQN3		bged01503	Aminotransferase, classes I and II	EBGED10_19400	K00837		1.37621	1.72556	0.0188123		+	-2.7601	-2.03199	-1.80806	-1.44816	-1.26196	-2.00746	-0.251665	0.0328292	-0.311976	0.109065	-1.86205	-0.485841	1.37621	+	0	79.561	733480000	44	10	10	10	399	399	44.425	31.3	1.72556	-1.37621	-2.93642	N1LQN3	N1LQN3	>tr|N1LQN3|N1LQN3_9BACI Aminotransferase, classes I and II OS=Bacillus sp. GeD10 GN=EBGED10_19400 PE=3 SV=1	N1LQN3		Aminotransferase, classes I and II	>tr|N1LQN3|N1LQN3_9BACI Aminotransferase, classes I and II OS=Bacillus sp. GeD10	EBGED10_19400
	N1LJ42		bged01013	UDP-N-acetylenolpyruvoylglucosamine reductase	murB	K00075		1.3717	1.87063	0.01347		+	-0.61319	0.310268	0.122565	0.343367	1.01077	1.34269	0.515491	1.48022	2.5109	2.183	0.234756	1.60646	1.3717	+	0	103.21	1628600000	101	12	12	12	305	305	33.506	44.6	1.87063	-1.3717	-3.1563	N1LJ42	N1LJ42	>tr|N1LJ42|N1LJ42_9BACI UDP-N-acetylenolpyruvoylglucosamine reductase OS=Bacillus sp. GeD10 GN=murB PE=3 SV=1	N1LJ42		UDP-N-acetylenolpyruvoylglucosamine reductase	>tr|N1LJ42|N1LJ42_9BACI UDP-N-acetylenolpyruvoylglucosamine reductase OS=Bacillus sp. GeD10	murB
	N1LQ59		#N/A	Response regulator, putative	EBGED10_34340	K01175		1.36471	2.7773	0.00166994		+	-0.846814	-0.847244	-0.507924	-0.234782	-0.108443	0.369233	0.220393	0.858896	1.44257	1.38723	-0.509042	0.855664	1.36471	+	0	238.04	868180000	106	14	14	14	364	364	43.093	48.4	2.7773	-1.36471	-4.63828	N1LQ59	N1LQ59	>tr|N1LQ59|N1LQ59_9BACI Response regulator, putative OS=Bacillus sp. GeD10 GN=EBGED10_34340 PE=4 SV=1	N1LQ59		Response regulator, putative	>tr|N1LQ59|N1LQ59_9BACI Response regulator, putative OS=Bacillus sp. GeD10	EBGED10_34340
	N1LTK9		#N/A	TPR-repeat-containing protein	EBGED10_32970	K12600		1.35102	2.18231	0.00657187		+	0.302178	-0.738431	0.111166	0.160997	0.582656	0.464413	1.37159	1.22696	1.97124	2.13944	0.0837132	1.43473	1.35102	+	0	323.31	1234600000	95	30	30	30	1400	1400	164	29.7	2.18231	-1.35102	-3.6418	N1LTK9	N1LTK9	>tr|N1LTK9|N1LTK9_9BACI TPR-repeat-containing protein OS=Bacillus sp. GeD10 GN=EBGED10_32970 PE=4 SV=1	N1LTK9		TPR-repeat-containing protein	>tr|N1LTK9|N1LTK9_9BACI TPR-repeat-containing protein OS=Bacillus sp. GeD10	EBGED10_32970
	N1LQS7		bged02173	Methionine aminopeptidase	map	K01265		1.33986	2.7936	0.00160841		+	0.714726	0.370691	-0.525728	0.28001	-0.0688963	1.27383	1.25181	2.11158	1.77614	1.05672	0.154161	1.49402	1.33986	+	0	281.43	7450100000	142	13	13	13	251	251	27.455	64.9	2.7936	-1.33986	-4.66717	N1LQS7	N1LQS7	>tr|N1LQS7|N1LQS7_9BACI Methionine aminopeptidase OS=Bacillus sp. GeD10 GN=map PE=3 SV=1	N1LQS7		Methionine aminopeptidase	>tr|N1LQS7|N1LQS7_9BACI Methionine aminopeptidase OS=Bacillus sp. GeD10	map
	N1LM26		bged02443	Dihydrolipoyl dehydrogenase	EBGED10_25250	K00382		1.33869	4.26362	5.44983e-05		+	1.45292	1.68106	2.09785	2.40114	1.91803	3.09578	3.35866	3.2561	3.37087	3.16304	1.9102	3.24889	1.33869	+	0	323.31	7388400000	407	23	23	23	473	473	50.774	74.6	4.26362	-1.33869	-7.75679	N1LM26	N1LM26	>tr|N1LM26|N1LM26_9BACI Dihydrolipoyl dehydrogenase OS=Bacillus sp. GeD10 GN=EBGED10_25250 PE=4 SV=1	N1LM26		Dihydrolipoyl dehydrogenase	>tr|N1LM26|N1LM26_9BACI Dihydrolipoyl dehydrogenase OS=Bacillus sp. GeD10	EBGED10_25250
	N1LS58		bged02067	Penicillin-binding protein 3	EBGED10_42810	K18149		1.33721	2.08123	0.00829406		+	-0.790261	-0.868641	-0.499201	-1.04466	-0.242941	-0.216121	-0.129821	0.865704	1.10371	1.61686	-0.689141	0.648068	1.33721	+	0	115.33	1094200000	92	16	16	18	661	661	72.887	30.9	2.08123	-1.33721	-3.4821	N1LS58	N1LS58	>tr|N1LS58|N1LS58_9BACI Penicillin-binding protein 3 OS=Bacillus sp. GeD10 GN=EBGED10_42810 PE=4 SV=1	N1LS58		Penicillin-binding protein 3	>tr|N1LS58|N1LS58_9BACI Penicillin-binding protein 3 OS=Bacillus sp. GeD10	EBGED10_42810
	N1LP42		#N/A	Metallo-beta-lactamase family protein	EBGED10_37400	#N/A		1.33559	2.78619	0.00163611		+	NaN	-2.13154	-2.11374	-1.29531	-1.58764	-0.0979152	-1.0893	-0.219255	-0.539527	-0.286318	-1.78206	-0.446463	1.33559	+	0	257.21	943810000	31	7	7	7	275	275	31.477	42.5	2.78619	-1.33559	-4.9608	N1LP42	N1LP42	>tr|N1LP42|N1LP42_9BACI Metallo-beta-lactamase family protein OS=Bacillus sp. GeD10 GN=EBGED10_37400 PE=4 SV=1	N1LP42		Metallo-beta-lactamase family protein	>tr|N1LP42|N1LP42_9BACI Metallo-beta-lactamase family protein OS=Bacillus sp. GeD10	EBGED10_37400
	N1LU96		bged03247	Lipase	EBGED10_32730	K01066		1.33237	2.49468	0.00320123		+	NaN	-1.60284	-1.30433	-1.53402	-0.755963	-0.792614	0.326958	0.503515	0.0584426	0.0691322	-1.29929	0.0330867	1.33237	+	0	125.58	1000000000	44	10	10	10	318	318	35.411	43.7	2.49468	-1.33237	-4.3885	N1LU96	N1LU96	>tr|N1LU96|N1LU96_9BACI Lipase OS=Bacillus sp. GeD10 GN=EBGED10_32730 PE=4 SV=1	N1LU96		Lipase	>tr|N1LU96|N1LU96_9BACI Lipase OS=Bacillus sp. GeD10	EBGED10_32730
	N1LVU8		bged02474	Oligoendopeptidase F	EBGED10_61060	K08602		1.33053	2.31124	0.00488381		+	-1.52992	-1.14111	-0.759362	-0.879614	-0.483731	-0.733491	0.500695	0.374761	0.705728	1.01122	-0.958746	0.371783	1.33053	+	0	148.48	996650000	98	20	20	20	563	563	66.583	41.9	2.31124	-1.33053	-3.84909	N1LVU8	N1LVU8	>tr|N1LVU8|N1LVU8_9BACI Oligoendopeptidase F OS=Bacillus sp. GeD10 GN=EBGED10_61060 PE=4 SV=1	N1LVU8		Oligoendopeptidase F	>tr|N1LVU8|N1LVU8_9BACI Oligoendopeptidase F OS=Bacillus sp. GeD10	EBGED10_61060
	N1LP99		bged02416	3-ketoacyl-CoA thiolase [isoleucine degradation]	EBGED10_14560	K00626		1.32764	1.94327	0.0113953		+	NaN	NaN	-3.17752	-3.66671	-2.82981	NaN	NaN	-1.87648	-2.21063	-1.60401	-3.22468	-1.89704	1.32764	+	0	24.127	273920000	19	10	10	10	427	427	44.865	34.2	1.94327	-1.32764	-4.43302	N1LP99	N1LP99	>tr|N1LP99|N1LP99_9BACI 3-ketoacyl-CoA thiolase [isoleucine degradation] OS=Bacillus sp. GeD10 GN=EBGED10_14560 PE=3 SV=1	N1LP99		3-ketoacyl-CoA thiolase [isoleucine degradation]	>tr|N1LP99|N1LP99_9BACI 3-ketoacyl-CoA thiolase [isoleucine degradation] OS=Bacillus sp. GeD10	EBGED10_14560
	N1LSF9		bged00623	Helicase loader DnaI	EBGED10_48800	K11144		1.32745	1.70455	0.0197447		+	NaN	-3.55099	-3.20972	NaN	NaN	NaN	NaN	-1.65752	-2.32813	-2.17308	-3.38036	-2.05291	1.32745	+	0	35.393	242610000	20	4	4	4	312	312	35.78	16.3	1.70455	-1.32745	-4.56241	N1LSF9	N1LSF9	>tr|N1LSF9|N1LSF9_9BACI Helicase loader DnaI OS=Bacillus sp. GeD10 GN=EBGED10_48800 PE=4 SV=1	N1LSF9		Helicase loader DnaI	>tr|N1LSF9|N1LSF9_9BACI Helicase loader DnaI OS=Bacillus sp. GeD10	EBGED10_48800
	N1LRW5		bged02273	Valine--tRNA ligase	valS	K01873		1.32333	2.78012	0.00165912		+	3.98572	4.23863	4.13319	4.4228	4.29263	4.51785	5.52655	5.6745	5.81843	6.15228	4.21459	5.53792	1.32333	+	0	323.31	33771000000	1113	66	66	66	881	881	101.72	76.4	2.78012	-1.32333	-4.64328	N1LRW5	N1LRW5	>tr|N1LRW5|N1LRW5_9BACI Valine--tRNA ligase OS=Bacillus sp. GeD10 GN=valS PE=3 SV=1	N1LRW5		Valine--tRNA ligase	>tr|N1LRW5|N1LRW5_9BACI Valine--tRNA ligase OS=Bacillus sp. GeD10	valS
	N1LG99		bged01874	Glycogen biosynthesis protein GlgD,glucose-1-phosphate adenylyltransferase family	EBGED10_2320	K00975		1.32207	3.54782	0.000283257		+	0.0983672	0.173813	0.357082	0.580382	0.351301	1.00564	1.48228	1.58502	2.16765	1.93072	0.312189	1.63426	1.32207	+	0	323.31	3267400000	195	17	17	17	344	344	38.606	67.2	3.54782	-1.32207	-6.11972	N1LG99	N1LG99	>tr|N1LG99|N1LG99_9BACI Glycogen biosynthesis protein GlgD,glucose-1-phosphate adenylyltransferase family OS=Bacillus sp. GeD10 GN=EBGED10_2320 PE=4 SV=1	N1LG99		Glycogen biosynthesis protein GlgD,glucose-1-phosphate adenylyltransferase family	>tr|N1LG99|N1LG99_9BACI Glycogen biosynthesis protein GlgD,glucose-1-phosphate adenylyltransferase family OS=Bacillus sp. GeD10	EBGED10_2320
	N1LTU9		bged02347	Cytosolic protein containing multiple CBS domains	EBGED10_48460	K00088		1.32063	2.91956	0.00120348		+	-1.20981	-0.927581	-0.697166	-0.281627	-0.420187	-0.142626	0.606048	1.08391	0.592421	0.927032	-0.707273	0.613358	1.32063	+	0	298.64	1444300000	78	10	10	10	437	437	48.68	37.3	2.91956	-1.32063	-4.89359	N1LTU9	N1LTU9	>tr|N1LTU9|N1LTU9_9BACI Cytosolic protein containing multiple CBS domains OS=Bacillus sp. GeD10 GN=EBGED10_48460 PE=4 SV=1	N1LTU9		Cytosolic protein containing multiple CBS domains	>tr|N1LTU9|N1LTU9_9BACI Cytosolic protein containing multiple CBS domains OS=Bacillus sp. GeD10	EBGED10_48460
	N1LM14		bged02773	Ribosomal-protein-S5p-alanine acetyltransferase	EBGED10_25100	K03790		1.3139	1.8316	0.0147367		+	-0.208179	0.108801	-0.326371	-0.0283471	0.280265	2.01686	0.205284	0.351523	1.97739	1.84463	-0.0347663	1.27914	1.3139	+	0	142.45	1779600000	101	12	12	12	181	181	21.746	65.2	1.8316	-1.3139	-3.09681	N1LM14	N1LM14	>tr|N1LM14|N1LM14_9BACI Ribosomal-protein-S5p-alanine acetyltransferase OS=Bacillus sp. GeD10 GN=EBGED10_25100 PE=4 SV=1	N1LM14		Ribosomal-protein-S5p-alanine acetyltransferase	>tr|N1LM14|N1LM14_9BACI Ribosomal-protein-S5p-alanine acetyltransferase OS=Bacillus sp. GeD10	EBGED10_25100
	N1LIR9		bged02091	Acyl-CoA dehydrogenase	EBGED10_13640	K00257		1.31028	4.38867	4.08629e-05		+	4.95259	5.06971	4.70161	4.99503	4.61381	6.19997	6.08252	6.07015	5.8572	6.67429	4.86655	6.17683	1.31028	+	0	323.31	55994000000	1099	43	43	44	594	594	65.6	76.9	4.38867	-1.31028	-8.07407	N1LIR9	N1LIR9	>tr|N1LIR9|N1LIR9_9BACI Acyl-CoA dehydrogenase OS=Bacillus sp. GeD10 GN=EBGED10_13640 PE=3 SV=1	N1LIR9		Acyl-CoA dehydrogenase	>tr|N1LIR9|N1LIR9_9BACI Acyl-CoA dehydrogenase OS=Bacillus sp. GeD10	EBGED10_13640
	N1LJI1		bged01347	3-oxoacyl-(Acyl carrier protein) synthase	EBGED10_16390	K00648		1.30607	4.22395	5.97104e-05		+	1.54437	1.78383	1.9172	1.99151	2.19621	3.17657	3.50844	3.08078	3.42758	2.77011	1.88662	3.1927	1.30607	+	0	303.35	9483600000	274	18	18	18	329	329	35.981	57.1	4.22395	-1.30607	-7.65824	N1LJI1	N1LJI1	>tr|N1LJI1|N1LJI1_9BACI 3-oxoacyl-(Acyl carrier protein) synthase OS=Bacillus sp. GeD10 GN=EBGED10_16390 PE=4 SV=1	N1LJI1		3-oxoacyl-(Acyl carrier protein) synthase	>tr|N1LJI1|N1LJI1_9BACI 3-oxoacyl-(Acyl carrier protein) synthase OS=Bacillus sp. GeD10	EBGED10_16390
	N1LZ53		bged00787	Proline--tRNA ligase	proS	K01881		1.29187	5.09885	7.96435e-06		+	1.02784	1.11636	1.19764	1.41413	1.19027	2.10636	2.41677	2.71159	2.46995	2.70091	1.18925	2.48112	1.29187	+	0	145.11	4668200000	230	20	20	20	476	476	54.745	53.6	5.09885	-1.29187	-10.0856	N1LZ53	N1LZ53	>tr|N1LZ53|N1LZ53_9BACI Proline--tRNA ligase OS=Bacillus sp. GeD10 GN=proS PE=3 SV=1	N1LZ53		Proline--tRNA ligase	>tr|N1LZ53|N1LZ53_9BACI Proline--tRNA ligase OS=Bacillus sp. GeD10	proS
	N1LLW0		bged00492	DNA-directed RNA polymerase subunit beta	rpoC	K03046		1.28875	3.28366	0.000520408		+	6.94501	7.17661	7.00467	6.99929	7.10679	7.67743	8.53913	7.91786	8.73336	8.80832	7.04647	8.33522	1.28875	+	0	323.31	197760000000	3581	121	121	121	1203	1203	134.35	85	3.28366	-1.28875	-5.58311	N1LLW0	N1LLW0	>tr|N1LLW0|N1LLW0_9BACI DNA-directed RNA polymerase subunit beta OS=Bacillus sp. GeD10 GN=rpoC PE=3 SV=1	N1LLW0		DNA-directed RNA polymerase subunit beta	>tr|N1LLW0|N1LLW0_9BACI DNA-directed RNA polymerase subunit beta OS=Bacillus sp. GeD10	rpoC
	N1LS54		bged02248	3-isopropylmalate dehydrogenase	leuB	K00052		1.28317	2.83812	0.00145172		+	-0.0473299	-0.0977392	0.0976971	0.220052	0.128595	0.352428	1.56012	1.86854	1.29817	1.63785	0.0602548	1.34342	1.28317	+	0	323.31	3091900000	188	17	17	17	354	354	38.474	70.1	2.83812	-1.28317	-4.74652	N1LS54	N1LS54	>tr|N1LS54|N1LS54_9BACI 3-isopropylmalate dehydrogenase OS=Bacillus sp. GeD10 GN=leuB PE=3 SV=1	N1LS54		3-isopropylmalate dehydrogenase	>tr|N1LS54|N1LS54_9BACI 3-isopropylmalate dehydrogenase OS=Bacillus sp. GeD10	leuB
	N1LYE3		bged01510	S-adenosylmethionine:tRNA ribosyltransferase-isomerase	queA	K07568		1.27987	2.66211	0.00217718		+	0.205196	-0.181163	0.480577	0.621916	0.767377	0.869813	1.48448	2.26013	1.94036	1.73848	0.378781	1.65865	1.27987	+	0	323.31	4399200000	187	15	15	15	350	350	39.47	59.7	2.66211	-1.27987	-4.43681	N1LYE3	N1LYE3	>tr|N1LYE3|N1LYE3_9BACI S-adenosylmethionine:tRNA ribosyltransferase-isomerase OS=Bacillus sp. GeD10 GN=queA PE=3 SV=1	N1LYE3		S-adenosylmethionine:tRNA ribosyltransferase-isomerase	>tr|N1LYE3|N1LYE3_9BACI S-adenosylmethionine:tRNA ribosyltransferase-isomerase OS=Bacillus sp. GeD10	queA
	N1M0N9		bged02751	Acetyltransferase, GNAT family	EBGED10_58120	K00680		1.27784	2.2251	0.00595521		+	-1.57963	-1.7759	-1.38073	-1.14765	-1.43523	-0.595524	-1.17964	-0.0710089	0.737377	0.178855	-1.46383	-0.185989	1.27784	+	0	56.327	703480000	66	12	12	12	385	385	45.631	40.5	2.2251	-1.27784	-3.71013	N1M0N9	N1M0N9	>tr|N1M0N9|N1M0N9_9BACI Acetyltransferase, GNAT family OS=Bacillus sp. GeD10 GN=EBGED10_58120 PE=4 SV=1	N1M0N9		Acetyltransferase, GNAT family	>tr|N1M0N9|N1M0N9_9BACI Acetyltransferase, GNAT family OS=Bacillus sp. GeD10	EBGED10_58120
	N1LWV7		bged02436	Catalase	EBGED10_59160	K03781		1.27701	2.98155	0.00104341		+	1.82087	2.22588	1.80132	2.28083	2.40565	3.92823	2.73621	3.09143	3.34494	3.81881	2.10691	3.38392	1.27701	+	0	323.31	8842900000	280	19	19	19	488	488	55.934	54.3	2.98155	-1.27701	-5.0072	N1LWV7	N1LWV7	>tr|N1LWV7|N1LWV7_9BACI Catalase OS=Bacillus sp. GeD10 GN=EBGED10_59160 PE=3 SV=1	N1LWV7		Catalase	>tr|N1LWV7|N1LWV7_9BACI Catalase OS=Bacillus sp. GeD10	EBGED10_59160
	N1LSS9		bged00223	ATP-dependent RecD-like DNA helicase	recD2	K03581		1.27412	1.60092	0.0250659		+	NaN	-2.53066	-2.02091	-1.77986	-1.73762	-2.10718	-0.915634	-0.406088	-0.216635	-0.0701703	-2.01726	-0.743142	1.27412	+	0	44.218	324000000	33	6	6	6	778	778	87.464	14	1.60092	-1.27412	-2.83941	N1LSS9	N1LSS9	>tr|N1LSS9|N1LSS9_9BACI ATP-dependent RecD-like DNA helicase OS=Bacillus sp. GeD10 GN=recD2 PE=3 SV=1	N1LSS9		ATP-dependent RecD-like DNA helicase	>tr|N1LSS9|N1LSS9_9BACI ATP-dependent RecD-like DNA helicase OS=Bacillus sp. GeD10	recD2
	N1LXC0		bged02471	Oligoendopeptidase F	EBGED10_43780	K08602		1.27106	2.90624	0.00124097		+	1.06168	1.08473	1.02171	1.28991	1.12136	1.37546	2.59231	2.53848	2.62143	2.80698	1.11588	2.38693	1.27106	+	0	292.47	3941700000	302	29	29	29	595	595	68.533	51.9	2.90624	-1.27106	-4.86937	N1LXC0	N1LXC0	>tr|N1LXC0|N1LXC0_9BACI Oligoendopeptidase F OS=Bacillus sp. GeD10 GN=EBGED10_43780 PE=4 SV=1	N1LXC0		Oligoendopeptidase F	>tr|N1LXC0|N1LXC0_9BACI Oligoendopeptidase F OS=Bacillus sp. GeD10	EBGED10_43780
	N1M135		bged01743	GTP pyrophosphokinase	EBGED10_59520	K07816		1.26425	1.68177	0.0208078		+	-2.66649	-2.72216	-3.6661	-2.16282	-2.27906	-0.70216	-2.75462	-1.01994	-1.26869	-1.42996	-2.69933	-1.43507	1.26425	+	0	61.871	501880000	58	8	8	8	212	212	24.926	47.6	1.68177	-1.26425	-2.87066	N1M135	N1M135	>tr|N1M135|N1M135_9BACI GTP pyrophosphokinase OS=Bacillus sp. GeD10 GN=EBGED10_59520 PE=4 SV=1	N1M135		GTP pyrophosphokinase	>tr|N1M135|N1M135_9BACI GTP pyrophosphokinase OS=Bacillus sp. GeD10	EBGED10_59520
N1LTU2	N1LTU2		#N/A	Uncharacterized protein	EBGED10_33670	#N/A		1.26044	2.41993	0.00380254		+	0.00202886	0.28543	0.553162	0.539353	0.890796	0.749857	1.68979	2.2495	1.62751	2.2563	0.454154	1.71459	1.26044	+	0	244.76	4151400000	135	13	13	13	415	415	47.935	57.1	2.41993	-1.26044	-4.02726	N1LTU2	N1LTU2	>tr|N1LTU2|N1LTU2_9BACI Uncharacterized protein OS=Bacillus sp. GeD10 GN=EBGED10_33670 PE=4 SV=1	N1LTU2		Uncharacterized protein	>tr|N1LTU2|N1LTU2_9BACI Uncharacterized protein OS=Bacillus sp. GeD10	EBGED10_33670
	N1LP44		bged03229	Cytosolic long-chain acyl-CoA thioester hydrolase family protein	EBGED10_17250	K01076		1.25968	2.70453	0.00197456		+	-1.85484	-2.07088	-1.18425	-2.10093	-1.39166	-0.0728372	-1.17569	-0.67683	-0.296932	-0.0818919	-1.72051	-0.460836	1.25968	+	0	97.959	730060000	46	7	7	7	170	170	19.062	57.1	2.70453	-1.25968	-4.51048	N1LP44	N1LP44	>tr|N1LP44|N1LP44_9BACI Cytosolic long-chain acyl-CoA thioester hydrolase family protein OS=Bacillus sp. GeD10 GN=EBGED10_17250 PE=4 SV=1	N1LP44		Cytosolic long-chain acyl-CoA thioester hydrolase family protein	>tr|N1LP44|N1LP44_9BACI Cytosolic long-chain acyl-CoA thioester hydrolase family protein OS=Bacillus sp. GeD10	EBGED10_17250
	N1M077		bged00246	Chromosome partition protein Smc	smc	K03529		1.25577	2.38373	0.00413307		+	1.91293	1.69544	2.26727	2.29946	2.36108	2.38512	3.27449	3.29276	3.76668	4.09598	2.10724	3.36301	1.25577	+	0	323.31	5570600000	319	50	50	50	1189	1189	136.15	56.2	2.38373	-1.25577	-3.96755	N1M077	N1M077	>tr|N1M077|N1M077_9BACI Chromosome partition protein Smc OS=Bacillus sp. GeD10 GN=smc PE=3 SV=1	N1M077		Chromosome partition protein Smc	>tr|N1M077|N1M077_9BACI Chromosome partition protein Smc OS=Bacillus sp. GeD10	smc
	N1LZU4		bged03444	Glucose 1-dehydrogenase	EBGED10_55220	K00219		1.25392	2.14599	0.0071452		+	-2.11411	-1.6712	-0.954806	-1.62381	-1.57244	-1.41088	-0.537728	0.174047	0.0260877	0.0817379	-1.58727	-0.333348	1.25392	+	0	125.5	1103300000	81	9	9	9	256	256	27.902	44.5	2.14599	-1.25392	-3.58413	N1LZU4	N1LZU4	>tr|N1LZU4|N1LZU4_9BACI Glucose 1-dehydrogenase OS=Bacillus sp. GeD10 GN=EBGED10_55220 PE=4 SV=1	N1LZU4		Glucose 1-dehydrogenase	>tr|N1LZU4|N1LZU4_9BACI Glucose 1-dehydrogenase OS=Bacillus sp. GeD10	EBGED10_55220
	N1LWE0		bged02016	D-alanine aminotransferase	EBGED10_42970	K00824		1.24655	4.04192	9.07982e-05		+	-0.217084	-0.649047	-0.774673	-0.178061	0.0532629	0.65928	0.829125	1.06017	1.06277	0.855815	-0.35312	0.893431	1.24655	+	0	204.32	1944900000	113	16	16	16	291	291	33.831	65.6	4.04192	-1.24655	-7.21848	N1LWE0	N1LWE0	>tr|N1LWE0|N1LWE0_9BACI D-alanine aminotransferase OS=Bacillus sp. GeD10 GN=EBGED10_42970 PE=3 SV=1	N1LWE0		D-alanine aminotransferase	>tr|N1LWE0|N1LWE0_9BACI D-alanine aminotransferase OS=Bacillus sp. GeD10	EBGED10_42970
	N1LV22		bged01419	Predicted N6-adenine-specific DNA methylase	EBGED10_38170	K07444		1.24447	2.18359	0.00655251		+	-0.232603	0.227774	0.730656	0.41491	0.885129	0.684012	1.45551	1.81853	1.95982	2.33032	0.405173	1.64964	1.24447	+	0	323.31	3646800000	217	23	23	23	379	379	43.198	77	2.18359	-1.24447	-3.64384	N1LV22	N1LV22	>tr|N1LV22|N1LV22_9BACI Predicted N6-adenine-specific DNA methylase OS=Bacillus sp. GeD10 GN=EBGED10_38170 PE=4 SV=1	N1LV22		Predicted N6-adenine-specific DNA methylase	>tr|N1LV22|N1LV22_9BACI Predicted N6-adenine-specific DNA methylase OS=Bacillus sp. GeD10	EBGED10_38170
	N1LQV9		bged00044	Histidine kinase	EBGED10_43300	K00936		1.22839	2.35289	0.00443721		+	-2.58292	-2.33046	-2.08605	-1.95862	-1.62104	-1.91314	-0.679007	-0.783279	-0.720141	-0.341588	-2.11582	-0.887432	1.22839	+	0	228.25	586100000	44	12	12	12	377	377	43.976	38.2	2.35289	-1.22839	-3.91698	N1LQV9	N1LQV9	>tr|N1LQV9|N1LQV9_9BACI Histidine kinase OS=Bacillus sp. GeD10 GN=EBGED10_43300 PE=4 SV=1	N1LQV9		Histidine kinase	>tr|N1LQV9|N1LQV9_9BACI Histidine kinase OS=Bacillus sp. GeD10	EBGED10_43300
	N1LE55		#N/A	Tetratricopeptide repeat family protein	EBGED10_4650	#N/A		1.22661	2.16819	0.00678902		+	1.89292	2.15018	2.49675	2.59333	2.55488	2.51571	3.34272	3.6007	4.09238	4.26962	2.33761	3.56423	1.22661	+	0	323.31	8045900000	382	46	46	46	920	920	106.51	64.1	2.16819	-1.22661	-3.61935	N1LE55	N1LE55	>tr|N1LE55|N1LE55_9BACI Tetratricopeptide repeat family protein OS=Bacillus sp. GeD10 GN=EBGED10_4650 PE=4 SV=1	N1LE55		Tetratricopeptide repeat family protein	>tr|N1LE55|N1LE55_9BACI Tetratricopeptide repeat family protein OS=Bacillus sp. GeD10	EBGED10_4650
	N1LKL9		bged00143	1-deoxy-D-xylulose-5-phosphate synthase	dxs	K01662		1.22408	3.44076	0.000362443		+	-0.845893	-0.883794	-0.712487	-0.619498	-0.323918	-0.069319	0.375633	0.637499	0.878721	0.912259	-0.677118	0.546959	1.22408	+	0	175.96	1170200000	71	16	16	16	630	630	69.384	40	3.44076	-1.22408	-5.89829	N1LKL9	N1LKL9	>tr|N1LKL9|N1LKL9_9BACI 1-deoxy-D-xylulose-5-phosphate synthase OS=Bacillus sp. GeD10 GN=dxs PE=3 SV=1	N1LKL9		1-deoxy-D-xylulose-5-phosphate synthase	>tr|N1LKL9|N1LKL9_9BACI 1-deoxy-D-xylulose-5-phosphate synthase OS=Bacillus sp. GeD10	dxs
	N1LRG3		bged00495	DNA-directed RNA polymerase subunit beta	rpoB	K03043		1.22061	2.83291	0.00146924		+	6.19925	6.88221	6.62065	6.49291	6.83606	7.17035	8.20639	7.39152	8.21447	8.15143	6.60622	7.82683	1.22061	+	0	323.31	137930000000	2643	97	97	97	1130	1130	126.21	78.3	2.83291	-1.22061	-4.7372	N1LRG3	N1LRG3	>tr|N1LRG3|N1LRG3_9BACI DNA-directed RNA polymerase subunit beta OS=Bacillus sp. GeD10 GN=rpoB PE=3 SV=1	N1LRG3		DNA-directed RNA polymerase subunit beta	>tr|N1LRG3|N1LRG3_9BACI DNA-directed RNA polymerase subunit beta OS=Bacillus sp. GeD10	rpoB
	N1LLF7		bged01195	Transcription accessory protein (S1 RNA-binding domain)	EBGED10_20920	K06959		1.21888	2.73844	0.00182623		+	1.1756	0.873047	1.12543	1.01837	1.53966	1.4769	2.37711	2.42021	2.6249	2.92742	1.14642	2.36531	1.21888	+	0	323.31	3981500000	263	31	31	31	722	722	82.182	54	2.73844	-1.21888	-4.56981	N1LLF7	N1LLF7	>tr|N1LLF7|N1LLF7_9BACI Transcription accessory protein (S1 RNA-binding domain) OS=Bacillus sp. GeD10 GN=EBGED10_20920 PE=4 SV=1	N1LLF7		Transcription accessory protein (S1 RNA-binding domain)	>tr|N1LLF7|N1LLF7_9BACI Transcription accessory protein (S1 RNA-binding domain) OS=Bacillus sp. GeD10	EBGED10_20920
	N1LZV4		bged00413	Ribonuclease J	rnj	K12574		1.20765	5.40799	3.90848e-06		+	3.32052	3.34442	3.28049	3.51014	3.54531	4.85225	4.32937	4.46317	4.64162	4.75274	3.40018	4.60783	1.20765	+	0	323.31	18095000000	740	36	36	36	555	555	61.813	76.4	5.40799	-1.20765	-11.0872	N1LZV4	N1LZV4	>tr|N1LZV4|N1LZV4_9BACI Ribonuclease J OS=Bacillus sp. GeD10 GN=rnj PE=3 SV=1	N1LZV4		Ribonuclease J	>tr|N1LZV4|N1LZV4_9BACI Ribonuclease J OS=Bacillus sp. GeD10	rnj
	N1LKI7		bged03293	Amidohydrolase YlmB, involved in salvage of thiamin pyrimidine moiety	EBGED10_4470	K01438		1.20621	2.82005	0.0015134		+	-1.48185	-1.52573	NaN	-1.77537	-1.86807	-1.17306	-0.596097	-0.0938894	-0.242102	-0.177564	-1.66275	-0.456542	1.20621	+	0	68.318	745690000	43	14	14	14	424	424	47.24	45.8	2.82005	-1.20621	-5.02998	N1LKI7	N1LKI7	>tr|N1LKI7|N1LKI7_9BACI Amidohydrolase YlmB, involved in salvage of thiamin pyrimidine moiety OS=Bacillus sp. GeD10 GN=EBGED10_4470 PE=4 SV=1	N1LKI7		Amidohydrolase YlmB, involved in salvage of thiamin pyrimidine moiety	>tr|N1LKI7|N1LKI7_9BACI Amidohydrolase YlmB, involved in salvage of thiamin pyrimidine moiety OS=Bacillus sp. GeD10	EBGED10_4470
	N1LTX2		bged00224	DNA polymerase	EBGED10_48710	K02335		1.20391	2.40547	0.00393122		+	1.89784	2.13465	2.37229	2.36653	2.52472	2.4115	3.4881	3.57923	3.78945	4.04733	2.25921	3.46312	1.20391	+	0	323.31	7334000000	353	43	43	43	877	877	99.41	60.1	2.40547	-1.20391	-4.00337	N1LTX2	N1LTX2	>tr|N1LTX2|N1LTX2_9BACI DNA polymerase OS=Bacillus sp. GeD10 GN=EBGED10_48710 PE=3 SV=1	N1LTX2		DNA polymerase	>tr|N1LTX2|N1LTX2_9BACI DNA polymerase OS=Bacillus sp. GeD10	EBGED10_48710
	N1M057		bged00249	Primosomal protein N	priA	K04066		1.20383	2.2122	0.00613473		+	NaN	-2.58089	-2.4702	-2.06205	-1.71181	NaN	-1.52861	-1.15254	-0.751541	-0.576943	-2.20624	-1.00241	1.20383	+	0	58.484	277440000	21	11	11	11	801	801	92.659	23.1	2.2122	-1.20383	-4.13179	N1M057	N1M057	>tr|N1M057|N1M057_9BACI Primosomal protein N OS=Bacillus sp. GeD10 GN=priA PE=3 SV=1	N1M057		Primosomal protein N	>tr|N1M057|N1M057_9BACI Primosomal protein N OS=Bacillus sp. GeD10	priA
	N1LTG0		bged02629	GTP-binding protein YqeH, required for biogenesis of 30S ribosome subunit	EBGED10_46540	K06948		1.20257	5.24687	5.66414e-06		+	-0.165958	-0.0156061	-0.0495345	0.453509	0.18098	1.25268	1.36604	1.16654	1.31874	1.31224	0.0806781	1.28325	1.20257	+	0	279.12	2580600000	111	12	12	12	368	368	41.242	50.5	5.24687	-1.20257	-10.5548	N1LTG0	N1LTG0	>tr|N1LTG0|N1LTG0_9BACI GTP-binding protein YqeH, required for biogenesis of 30S ribosome subunit OS=Bacillus sp. GeD10 GN=EBGED10_46540 PE=4 SV=1	N1LTG0		GTP-binding protein YqeH, required for biogenesis of 30S ribosome subunit	>tr|N1LTG0|N1LTG0_9BACI GTP-binding protein YqeH, required for biogenesis of 30S ribosome subunit OS=Bacillus sp. GeD10	EBGED10_46540
	N1LU79		bged01475	5-methyltetrahydropteroyltriglutamate--homocysteine methyltransferase	metE	K00549		1.19936	2.91262	0.00122286		+	8.18034	8.11444	7.87165	7.83694	7.96811	8.33263	9.4265	9.05274	9.51963	9.63676	7.9943	9.19365	1.19936	+	0	323.31	383770000000	3093	57	57	57	762	762	87.184	76.5	2.91262	-1.19936	-4.88097	N1LU79	N1LU79	>tr|N1LU79|N1LU79_9BACI 5-methyltetrahydropteroyltriglutamate--homocysteine methyltransferase OS=Bacillus sp. GeD10 GN=metE PE=3 SV=1	N1LU79		5-methyltetrahydropteroyltriglutamate--homocysteine methyltransferase	>tr|N1LU79|N1LU79_9BACI 5-methyltetrahydropteroyltriglutamate--homocysteine methyltransferase OS=Bacillus sp. GeD10	metE
	N1LSH5		bged00007	Phenylalanine--tRNA ligase alpha subunit	pheS	K01889		1.19549	1.81208	0.0154142		+	-0.105526	-0.143862	-0.140654	-0.214318	-0.149306	-0.346794	1.85488	1.65491	1.21313	0.847664	-0.150733	1.04476	1.19549	+	0	263.18	2904100000	116	14	14	14	344	344	38.989	50	1.81208	-1.19549	-3.06716	N1LSH5	N1LSH5	>tr|N1LSH5|N1LSH5_9BACI Phenylalanine--tRNA ligase alpha subunit OS=Bacillus sp. GeD10 GN=pheS PE=3 SV=1	N1LSH5		Phenylalanine--tRNA ligase alpha subunit	>tr|N1LSH5|N1LSH5_9BACI Phenylalanine--tRNA ligase alpha subunit OS=Bacillus sp. GeD10	pheS
	N1LTZ7		bged00008	Phenylalanine--tRNA ligase beta subunit	pheT	K01890		1.19496	2.91322	0.00122117		+	5.21454	5.17198	5.14664	5.15169	5.20128	5.471	6.41058	6.36327	6.78573	6.83037	5.17723	6.37219	1.19496	+	0	323.31	57063000000	1299	58	58	58	806	806	88.438	82.8	2.91322	-1.19496	-4.88206	N1LTZ7	N1LTZ7	>tr|N1LTZ7|N1LTZ7_9BACI Phenylalanine--tRNA ligase beta subunit OS=Bacillus sp. GeD10 GN=pheT PE=3 SV=1	N1LTZ7		Phenylalanine--tRNA ligase beta subunit	>tr|N1LTZ7|N1LTZ7_9BACI Phenylalanine--tRNA ligase beta subunit OS=Bacillus sp. GeD10	pheT
	N1LLH2		bged01740	ABC transporter, periplasmic spermidine putrescine-binding protein PotD (TC 3.A.1.11.1)	EBGED10_8280	K11069		1.19362	1.99689	0.0100718		+	-2.79886	-2.51725	-1.80161	-2.04725	-1.75123	-1.9621	-1.24407	-0.863344	-0.619235	-0.259363	-2.18324	-0.989622	1.19362	+	0	92.193	692050000	56	12	12	12	349	349	39.846	35.8	1.99689	-1.19362	-3.35056	N1LLH2	N1LLH2	>tr|N1LLH2|N1LLH2_9BACI ABC transporter, periplasmic spermidine putrescine-binding protein PotD (TC 3.A.1.11.1) OS=Bacillus sp. GeD10 GN=EBGED10_8280 PE=4 SV=1	N1LLH2		ABC transporter, periplasmic spermidine putrescine-binding protein PotD (TC 3.A.1.11.1)	>tr|N1LLH2|N1LLH2_9BACI ABC transporter, periplasmic spermidine putrescine-binding protein PotD (TC 3.A.1.11.1) OS=Bacillus sp. GeD10	EBGED10_8280
	N1LLJ3		bged00141	DNA topoisomerase 3	topB	K03169		1.19307	2.14218	0.00720816		+	1.56927	1.91421	1.8709	1.70298	2.38367	2.04541	3.074	3.03615	3.33059	3.92024	1.88821	3.08128	1.19307	+	0	323.31	6728600000	246	27	27	27	729	729	82.897	44.9	2.14218	-1.19307	-3.5781	N1LLJ3	N1LLJ3	>tr|N1LLJ3|N1LLJ3_9BACI DNA topoisomerase 3 OS=Bacillus sp. GeD10 GN=topB PE=3 SV=1	N1LLJ3		DNA topoisomerase 3	>tr|N1LLJ3|N1LLJ3_9BACI DNA topoisomerase 3 OS=Bacillus sp. GeD10	topB
	N1LNA0		bged01844	NADH-dependent butanol dehydrogenase A	EBGED10_29310	K00100		1.18591	1.75561	0.0175544		+	0.235189	0.455995	0.827913	0.972872	1.18946	0.650849	1.61372	2.35336	2.55676	2.43632	0.736285	1.9222	1.18591	+	0	323.31	5285300000	164	27	27	27	387	387	42.79	86.6	1.75561	-1.18592	-2.98172	N1LNA0	N1LNA0	>tr|N1LNA0|N1LNA0_9BACI NADH-dependent butanol dehydrogenase A OS=Bacillus sp. GeD10 GN=EBGED10_29310 PE=4 SV=1	N1LNA0		NADH-dependent butanol dehydrogenase A	>tr|N1LNA0|N1LNA0_9BACI NADH-dependent butanol dehydrogenase A OS=Bacillus sp. GeD10	EBGED10_29310
	N1LNQ1		bged02571	Possible serine/threonine specific protein phosphatase	EBGED10_35950	K01090		1.18292	2.4662	0.00341822		+	-3.18412	-3.89681	-3.90855	-3.68483	-4.06158	-3.4694	-2.61424	-2.2858	-2.40628	-2.0456	-3.74718	-2.56426	1.18292	+	0	12.77	176710000	24	4	4	4	375	375	42.804	12.3	2.4662	-1.18292	-4.10413	N1LNQ1	N1LNQ1	>tr|N1LNQ1|N1LNQ1_9BACI Possible serine/threonine specific protein phosphatase OS=Bacillus sp. GeD10 GN=EBGED10_35950 PE=4 SV=1	N1LNQ1		Possible serine/threonine specific protein phosphatase	>tr|N1LNQ1|N1LNQ1_9BACI Possible serine/threonine specific protein phosphatase OS=Bacillus sp. GeD10	EBGED10_35950
	N1LV16		bged00714	Prephenate dehydrogenase	EBGED10_58100	K04517		1.17982	2.13851	0.00726923		+	-2.84661	-2.00923	-1.86748	-1.50938	-2.08087	NaN	-0.788141	-0.807539	-1.4959	-0.439977	-2.06271	-0.882889	1.17982	+	0	99.675	613350000	47	8	8	8	366	366	41.019	34.2	2.13851	-1.17982	-3.73932	N1LV16	N1LV16	>tr|N1LV16|N1LV16_9BACI Prephenate dehydrogenase OS=Bacillus sp. GeD10 GN=EBGED10_58100 PE=4 SV=1	N1LV16		Prephenate dehydrogenase	>tr|N1LV16|N1LV16_9BACI Prephenate dehydrogenase OS=Bacillus sp. GeD10	EBGED10_58100
	N1LRX8		bged02546	Nicotinate phosphoribosyltransferase	EBGED10_42110	K00763		1.17662	3.77597	0.000167506		+	0.286251	0.0529848	0.80393	0.510682	0.786848	1.36499	1.53887	1.72815	1.70686	1.98494	0.488139	1.66476	1.17662	+	0	317.77	2868700000	218	28	28	28	487	487	56.097	69.8	3.77597	-1.17662	-6.61072	N1LRX8	N1LRX8	>tr|N1LRX8|N1LRX8_9BACI Nicotinate phosphoribosyltransferase OS=Bacillus sp. GeD10 GN=EBGED10_42110 PE=3 SV=1	N1LRX8		Nicotinate phosphoribosyltransferase	>tr|N1LRX8|N1LRX8_9BACI Nicotinate phosphoribosyltransferase OS=Bacillus sp. GeD10	EBGED10_42110
	N1LTP7		#N/A	UPF0061 protein EBGED10	EBGED10_47390	K08997		1.17215	2.38489	0.00412199		+	-1.67522	-1.79585	-0.970728	-1.53535	-1.06	-1.18434	-0.196499	0.16761	0.0311253	0.00572514	-1.40743	-0.235275	1.17215	+	0	95.87	699290000	92	10	10	10	488	488	55.146	28.1	2.38489	-1.17215	-3.96947	N1LTP7	N1LTP7	>tr|N1LTP7|N1LTP7_9BACI UPF0061 protein EBGED10_47390 OS=Bacillus sp. GeD10 GN=EBGED10_47390 PE=3 SV=1	N1LTP7		UPF0061 protein EBGED10	>tr|N1LTP7|N1LTP7_9BACI UPF0061 protein EBGED10_47390 OS=Bacillus sp. GeD10	EBGED10_47390
	N1LLI2		bged00014	Succinate dehydrogenase iron-sulfur protein	EBGED10_23380	K00240		1.17187	1.55933	0.027585		+	-1.40222	-0.177712	0.729588	-0.293286	0.246472	NaN	0.585924	1.11531	0.989102	1.27943	-0.179432	0.992442	1.17187	+	0	288.05	2628800000	62	9	9	9	253	253	28.25	50.6	1.55933	-1.17187	-2.77274	N1LLI2	N1LLI2	>tr|N1LLI2|N1LLI2_9BACI Succinate dehydrogenase iron-sulfur protein OS=Bacillus sp. GeD10 GN=EBGED10_23380 PE=4 SV=1	N1LLI2		Succinate dehydrogenase iron-sulfur protein	>tr|N1LLI2|N1LLI2_9BACI Succinate dehydrogenase iron-sulfur protein OS=Bacillus sp. GeD10	EBGED10_23380
	N1LPF1		bged00236	Bifunctional ligase/repressor BirA	birA	K03524		1.17152	2.24621	0.0056727		+	-3.73082	-2.86128	-2.57044	-2.45064	-2.51998	-2.22508	-1.87398	-0.995766	-1.69646	-1.48427	-2.82663	-1.65511	1.17152	+	0	32.991	377150000	23	8	8	8	326	326	36.243	38	2.24621	-1.17152	-3.74401	N1LPF1	N1LPF1	>tr|N1LPF1|N1LPF1_9BACI Bifunctional ligase/repressor BirA OS=Bacillus sp. GeD10 GN=birA PE=3 SV=1	N1LPF1		Bifunctional ligase/repressor BirA	>tr|N1LPF1|N1LPF1_9BACI Bifunctional ligase/repressor BirA OS=Bacillus sp. GeD10	birA
N1LR22	N1LR22		bged02402	Uncharacterized protein Bsub YpbR	EBGED10_37990	#N/A		1.17111	2.35111	0.00445547		+	2.55129	2.43052	2.82065	2.92383	3.08463	3.11853	3.95006	3.55356	4.50418	4.54013	2.76218	3.93329	1.17111	+	0	323.31	9085100000	459	53	53	53	1219	1219	140.71	51	2.35111	-1.17111	-3.91406	N1LR22	N1LR22	>tr|N1LR22|N1LR22_9BACI Uncharacterized protein Bsub YpbR OS=Bacillus sp. GeD10 GN=EBGED10_37990 PE=4 SV=1	N1LR22		Uncharacterized protein Bsub YpbR	>tr|N1LR22|N1LR22_9BACI Uncharacterized protein Bsub YpbR OS=Bacillus sp. GeD10	EBGED10_37990
N1LPJ6	N1LPJ6		#N/A	Uncharacterized protein	EBGED10_15860	#N/A		1.16918	2.20193	0.00628163		+	-2.87629	-3.05684	-2.16818	-2.64087	-2.11851	NaN	-1.91937	-1.61632	-1.31552	-0.760598	-2.57214	-1.40295	1.16918	+	0	43.152	391260000	30	6	6	6	236	236	28.246	27.1	2.20193	-1.16918	-3.85133	N1LPJ6	N1LPJ6	>tr|N1LPJ6|N1LPJ6_9BACI Uncharacterized protein OS=Bacillus sp. GeD10 GN=EBGED10_15860 PE=4 SV=1	N1LPJ6		Uncharacterized protein	>tr|N1LPJ6|N1LPJ6_9BACI Uncharacterized protein OS=Bacillus sp. GeD10	EBGED10_15860
	N1LPA9		bged02464	Thermostable carboxypeptidase 1	EBGED10_38050	K01299		1.16831	2.72452	0.00188571		+	3.88856	4.02397	4.23526	3.91118	4.04605	4.23743	5.18484	5.35799	5.56921	5.59707	4.021	5.18931	1.16831	+	0	323.31	34354000000	697	29	29	29	505	505	58.97	55.8	2.72452	-1.16831	-4.54541	N1LPA9	N1LPA9	>tr|N1LPA9|N1LPA9_9BACI Thermostable carboxypeptidase 1 OS=Bacillus sp. GeD10 GN=EBGED10_38050 PE=4 SV=1	N1LPA9		Thermostable carboxypeptidase 1	>tr|N1LPA9|N1LPA9_9BACI Thermostable carboxypeptidase 1 OS=Bacillus sp. GeD10	EBGED10_38050
	N1LVX5		#N/A	NAD(FAD)-utilizing dehydrogenases	EBGED10_41470	K07007		1.16296	3.78701	0.000163302		+	-1.23671	-1.45121	-1.19469	-0.829425	-1.06245	-0.478545	0.20584	0.0590186	-0.0932984	0.347287	-1.15489	0.00806039	1.16296	+	0	87.881	836490000	64	11	11	11	423	423	46.211	38.1	3.78701	-1.16296	-6.63516	N1LVX5	N1LVX5	>tr|N1LVX5|N1LVX5_9BACI NAD(FAD)-utilizing dehydrogenases OS=Bacillus sp. GeD10 GN=EBGED10_41470 PE=4 SV=1	N1LVX5		NAD(FAD)-utilizing dehydrogenases	>tr|N1LVX5|N1LVX5_9BACI NAD(FAD)-utilizing dehydrogenases OS=Bacillus sp. GeD10	EBGED10_41470
	N1LTN9		bged01592	2-isopropylmalate synthase	leuA	K01649		1.16232	2.3235	0.00474791		+	-0.476235	-0.678824	0.100445	-0.131903	0.104842	-0.069345	1.17206	1.13007	1.33202	1.16514	-0.216335	0.945989	1.16232	+	0	144.26	1375300000	104	15	15	15	500	500	54.565	47	2.3235	-1.16232	-3.86902	N1LTN9	N1LTN9	>tr|N1LTN9|N1LTN9_9BACI 2-isopropylmalate synthase OS=Bacillus sp. GeD10 GN=leuA PE=3 SV=1	N1LTN9		2-isopropylmalate synthase	>tr|N1LTN9|N1LTN9_9BACI 2-isopropylmalate synthase OS=Bacillus sp. GeD10	leuA
	N1LDS9		bged00920	4-diphosphocytidyl-2-C-methyl-D-erythritol kinase	ispE	K00919		1.14883	3.03633	0.000919743		+	-2.84949	-2.73285	-3.05907	-2.62887	-2.34026		-2.08333	-1.39864	-1.56492	-1.24623	-2.72211	-1.57328	1.14883	+	0	48.49	428390000	21	9	9	9	289	289	31.581	42.2	3.03633	-1.14883	-5.48636	N1LDS9	N1LDS9	>tr|N1LDS9|N1LDS9_9BACI 4-diphosphocytidyl-2-C-methyl-D-erythritol kinase OS=Bacillus sp. GeD10 GN=ispE PE=3 SV=1	N1LDS9		4-diphosphocytidyl-2-C-methyl-D-erythritol kinase	>tr|N1LDS9|N1LDS9_9BACI 4-diphosphocytidyl-2-C-methyl-D-erythritol kinase OS=Bacillus sp. GeD10	ispE
	N1LHI0		bged00744	Ribonucleoside-diphosphate reductase	EBGED10_15130	K00525		1.14699	2.34471	0.00452153		+	3.02439	2.84097	2.92725	2.97671	3.23632	3.09632	4.12712	4.2151	4.54592	4.75614	3.00113	4.14812	1.14699	+	0	323.31	12518000000	450	42	42	42	682	682	78.232	75.1	2.34471	-1.14699	-3.90362	N1LHI0	N1LHI0	>tr|N1LHI0|N1LHI0_9BACI Ribonucleoside-diphosphate reductase OS=Bacillus sp. GeD10 GN=EBGED10_15130 PE=3 SV=1	N1LHI0		Ribonucleoside-diphosphate reductase	>tr|N1LHI0|N1LHI0_9BACI Ribonucleoside-diphosphate reductase OS=Bacillus sp. GeD10	EBGED10_15130
	N1LLA5		bged02550	Putative toxin component near putative ESAT-related proteins, repetitive	EBGED10_20210	K15125		1.1411	2.19113	0.00643982		+	-0.683989	-0.880432	0.19451	-1.02758	-0.332739	0.0819753	0.0718019	0.833902	0.794042	1.19353	-0.546045	0.595051	1.1411	+	0	137.65	2011300000	98	NaN	21	22	NaN	608	67.492	38.8	2.19113	-1.1411	-3.65584	N1LLA5;N1LMD1;N1LKH2	N1LLA5	>tr|N1LLA5|N1LLA5_9BACI Putative toxin component near putative ESAT-related proteins, repetitive OS=Bacillus sp. GeD10 GN=EBGED10_20210 PE=4 SV=1	N1LLA5		Putative toxin component near putative ESAT-related proteins, repetitive	>tr|N1LLA5|N1LLA5_9BACI Putative toxin component near putative ESAT-related proteins, repetitive OS=Bacillus sp. GeD10	EBGED10_20210
	N1LL03		bged02065	Dihydropteroate synthase	EBGED10_3160	K00796		1.13874	1.64515	0.0226387		+	0.92763	-1.20427	-0.82658	-0.494177	-0.848392	0.482777	0.116783	0.934713	0.980047	0.733569	-0.489158	0.649578	1.13874	+	0	323.31	3101200000	76	12	12	12	277	277	30.537	59.2	1.64515	-1.13874	-2.81583	N1LL03	N1LL03	>tr|N1LL03|N1LL03_9BACI Dihydropteroate synthase OS=Bacillus sp. GeD10 GN=EBGED10_3160 PE=3 SV=1	N1LL03		Dihydropteroate synthase	>tr|N1LL03|N1LL03_9BACI Dihydropteroate synthase OS=Bacillus sp. GeD10	EBGED10_3160
	N1LX31		bged02014	Adenosylmethionine-8-amino-7-oxononanoate aminotransferase	EBGED10_58690	K00833		1.13868	2.02214	0.00950306		+	-2.74	-2.477	-2.46964	-2.01269	-1.6796	-1.96434	-1.52754	-0.915878	-0.35921	-0.918573	-2.27579	-1.13711	1.13868	+	0	92.215	450600000	55	9	9	9	450	450	50.169	30	2.02214	-1.13868	-3.38978	N1LX31	N1LX31	>tr|N1LX31|N1LX31_9BACI Adenosylmethionine-8-amino-7-oxononanoate aminotransferase OS=Bacillus sp. GeD10 GN=EBGED10_58690 PE=3 SV=1	N1LX31		Adenosylmethionine-8-amino-7-oxononanoate aminotransferase	>tr|N1LX31|N1LX31_9BACI Adenosylmethionine-8-amino-7-oxononanoate aminotransferase OS=Bacillus sp. GeD10	EBGED10_58690
	N1LP45		bged00475	Flagellar motor switch protein FliG	EBGED10_32460	K02410		1.13837	1.52613	0.0297764		+	NaN	NaN	-2.01836	-1.44195	NaN	NaN	NaN	-0.305928	-0.8266	-0.642828	-1.73016	-0.591785	1.13837	+	0	28.834	646320000	23	2	2	2	334	334	38.23	12.3	1.52613	-1.13837	-3.90727	N1LP45	N1LP45	>tr|N1LP45|N1LP45_9BACI Flagellar motor switch protein FliG OS=Bacillus sp. GeD10 GN=EBGED10_32460 PE=4 SV=1	N1LP45		Flagellar motor switch protein FliG	>tr|N1LP45|N1LP45_9BACI Flagellar motor switch protein FliG OS=Bacillus sp. GeD10	EBGED10_32460
	N1M0Z6		bged00412	Ribonuclease J	rnj	K12574		1.13539	3.72326	0.00018912		+	3.47418	3.64653	3.57995	4.04928	3.79675	5.30856	4.40765	4.79285	4.8948	4.81978	3.70934	4.84473	1.13539	+	0	323.31	19855000000	845	43	43	43	556	556	60.963	78.4	3.72326	-1.13539	-6.49489	N1M0Z6	N1M0Z6	>tr|N1M0Z6|N1M0Z6_9BACI Ribonuclease J OS=Bacillus sp. GeD10 GN=rnj PE=3 SV=1	N1M0Z6		Ribonuclease J	>tr|N1M0Z6|N1M0Z6_9BACI Ribonuclease J OS=Bacillus sp. GeD10	rnj
	N1LMS6		bged00631	Homoserine dehydrogenase	EBGED10_27850	K00003		1.13338	1.76051	0.0173577		+	-1.16269	-1.29762	-1.16964	-1.08721	-1.42946	-1.45949	0.214344	0.423227	-0.295144	0.637361	-1.22932	-0.0959413	1.13338	+	0	119.34	926210000	82	14	14	14	431	431	46.769	47.3	1.76051	-1.13338	-2.9891	N1LMS6	N1LMS6	>tr|N1LMS6|N1LMS6_9BACI Homoserine dehydrogenase OS=Bacillus sp. GeD10 GN=EBGED10_27850 PE=3 SV=1	N1LMS6		Homoserine dehydrogenase	>tr|N1LMS6|N1LMS6_9BACI Homoserine dehydrogenase OS=Bacillus sp. GeD10	EBGED10_27850
	N1LWF6		bged00615	Dihydroxyacetone kinase family protein	EBGED10_56590	K07030		1.13119	2.48776	0.00325264		+	1.74004	1.96555	2.16104	1.97885	2.18501	2.26106	3.3316	3.77026	2.88206	3.44147	2.0061	3.13729	1.13119	+	0	323.31	7305700000	291	26	26	26	558	558	60.602	62	2.48776	-1.13119	-4.14017	N1LWF6	N1LWF6	>tr|N1LWF6|N1LWF6_9BACI Dihydroxyacetone kinase family protein OS=Bacillus sp. GeD10 GN=EBGED10_56590 PE=4 SV=1	N1LWF6		Dihydroxyacetone kinase family protein	>tr|N1LWF6|N1LWF6_9BACI Dihydroxyacetone kinase family protein OS=Bacillus sp. GeD10	EBGED10_56590
	N1LRE0		bged00964	Probable butyrate kinase	buk	K00929		1.12876	1.52837	0.029623		+	-0.222386	-0.189406	0.405162	1.13495	1.03922	0.627547	1.24492	2.47497	1.49983	1.96406	0.43351	1.56227	1.12876	+	0	309.77	4417800000	118	14	14	14	367	367	39.952	64.9	1.52837	-1.12876	-2.64196	N1LRE0	N1LRE0	>tr|N1LRE0|N1LRE0_9BACI Probable butyrate kinase OS=Bacillus sp. GeD10 GN=buk PE=3 SV=1	N1LRE0		Probable butyrate kinase	>tr|N1LRE0|N1LRE0_9BACI Probable butyrate kinase OS=Bacillus sp. GeD10	buk
N1LUE5	N1LUE5		#N/A	Uncharacterized protein	EBGED10_50260	#N/A		1.12571	1.64628	0.02258		+	-3.13427	-4.22558	-4.01294	-3.54957	-2.97579	NaN	-2.61961	-1.91852	-3.26028	-2.01727	-3.57963	-2.45392	1.12571	+	0	28.221	357200000	28	6	6	6	226	226	25.751	32.3	1.64628	-1.12571	-2.9125	N1LUE5	N1LUE5	>tr|N1LUE5|N1LUE5_9BACI Uncharacterized protein OS=Bacillus sp. GeD10 GN=EBGED10_50260 PE=4 SV=1	N1LUE5		Uncharacterized protein	>tr|N1LUE5|N1LUE5_9BACI Uncharacterized protein OS=Bacillus sp. GeD10	EBGED10_50260
	N1LRK7		bged00606	Gamma-glutamyl phosphate reductase	proA	K00147		1.12425	2.10321	0.00788478		+	-1.36162	-1.97888	-2.06659	-1.28988	-1.94616	-0.52011	-1.34826	0.157821	-1.07164	-0.239684	-1.72863	-0.604375	1.12425	+	0	313.82	832870000	49	12	12	12	415	415	45.619	41	2.10321	-1.12425	-3.51662	N1LRK7	N1LRK7	>tr|N1LRK7|N1LRK7_9BACI Gamma-glutamyl phosphate reductase OS=Bacillus sp. GeD10 GN=proA PE=3 SV=1	N1LRK7		Gamma-glutamyl phosphate reductase	>tr|N1LRK7|N1LRK7_9BACI Gamma-glutamyl phosphate reductase OS=Bacillus sp. GeD10	proA
	N1LGA8		bged01540	Menaquinone-specific isochorismate synthase	EBGED10_2420	K02552		1.12023	2.32166	0.00476799		+	-2.50496	-2.19348	-2.11804	-1.62538	-1.84708	-1.88096	-0.894391	-0.496383	-0.838405	-0.577672	-2.05779	-0.937562	1.12023	+	0	40.87	445560000	57	12	12	12	464	464	52.046	31	2.32166	-1.12023	-3.86604	N1LGA8	N1LGA8	>tr|N1LGA8|N1LGA8_9BACI Menaquinone-specific isochorismate synthase OS=Bacillus sp. GeD10 GN=EBGED10_2420 PE=4 SV=1	N1LGA8		Menaquinone-specific isochorismate synthase	>tr|N1LGA8|N1LGA8_9BACI Menaquinone-specific isochorismate synthase OS=Bacillus sp. GeD10	EBGED10_2420
	N1LVM8		bged01186	Glycerol-3-phosphate dehydrogenase	EBGED10_40370	K00111		1.1151	3.34386	0.000453042		+	1.5082	1.78974	1.64861	1.58533	1.96064	2.20486	2.66162	3.2283	3.0597	2.9135	1.6985	2.8136	1.1151	+	0	323.31	6052500000	286	30	30	30	560	560	62.518	64.1	3.34386	-1.1151	-5.70256	N1LVM8	N1LVM8	>tr|N1LVM8|N1LVM8_9BACI Glycerol-3-phosphate dehydrogenase OS=Bacillus sp. GeD10 GN=EBGED10_40370 PE=3 SV=1	N1LVM8		Glycerol-3-phosphate dehydrogenase	>tr|N1LVM8|N1LVM8_9BACI Glycerol-3-phosphate dehydrogenase OS=Bacillus sp. GeD10	EBGED10_40370
	N1LRZ0		bged02325	DNA ligase	ligA	K01972		1.11442	3.14195	0.000721198		+	2.44923	2.38841	2.48597	2.37077	2.86178	3.3573	3.13693	3.52672	3.92652	4.18077	2.51123	3.62565	1.11442	+	0	323.31	8906100000	405	38	38	38	669	669	75.169	66.1	3.14195	-1.11442	-5.30822	N1LRZ0	N1LRZ0	>tr|N1LRZ0|N1LRZ0_9BACI DNA ligase OS=Bacillus sp. GeD10 GN=ligA PE=3 SV=1	N1LRZ0		DNA ligase	>tr|N1LRZ0|N1LRZ0_9BACI DNA ligase OS=Bacillus sp. GeD10	ligA
	N1LL98		bged00245	DNA topoisomerase 4 subunit A	parC	K02621		1.10754	3.11321	0.000770528		+	1.88139	2.06912	2.17368	2.41892	2.43857	3.30182	2.89954	2.89777	3.65409	3.76617	2.19633	3.30388	1.10754	+	0	323.31	5600800000	278	32	32	32	807	807	91.498	51.1	3.11321	-1.10754	-5.25353	N1LL98	N1LL98	>tr|N1LL98|N1LL98_9BACI DNA topoisomerase 4 subunit A OS=Bacillus sp. GeD10 GN=parC PE=3 SV=1	N1LL98		DNA topoisomerase 4 subunit A	>tr|N1LL98|N1LL98_9BACI DNA topoisomerase 4 subunit A OS=Bacillus sp. GeD10	parC
	N1M013		bged03302	Putative cysteine ligase BshC	bshC	#N/A		1.10554	2.62995	0.00234447		+	0.505427	0.364611	0.967278	1.01181	0.80522	0.969775	2.0645	2.03324	1.99133	2.12319	0.730869	1.83641	1.10554	+	0	323.31	3332600000	255	20	20	20	538	538	62.699	52.6	2.62995	-1.10554	-4.38137	N1M013	N1M013	>tr|N1M013|N1M013_9BACI Putative cysteine ligase BshC OS=Bacillus sp. GeD10 GN=bshC PE=3 SV=1	N1M013		Putative cysteine ligase BshC	>tr|N1M013|N1M013_9BACI Putative cysteine ligase BshC OS=Bacillus sp. GeD10	bshC
	N1LPX5		bged00930	Collagen adhesion protein	EBGED10_20040	K00058		1.09321	1.65509	0.0221264		+	0.0889135	-0.138179	-0.088881	-0.202366	-0.165987	0.461812	0.595179	0.276388	1.25101	2.37516	-0.1013	0.991911	1.09321	+	0	35.857	1951100000	36	19	19	19	3117	3117	345.58	9.1	1.65509	-1.09321	-2.8307	N1LPX5	N1LPX5	>tr|N1LPX5|N1LPX5_9BACI Collagen adhesion protein OS=Bacillus sp. GeD10 GN=EBGED10_20040 PE=4 SV=1	N1LPX5		Collagen adhesion protein	>tr|N1LPX5|N1LPX5_9BACI Collagen adhesion protein OS=Bacillus sp. GeD10	EBGED10_20040
	N1LYU4		bged02000	COG0076: Glutamate decarboxylase and related PLP-dependent proteins	EBGED10_51730	K01580		1.09203	3.00907	0.000979338		+	1.52575	1.69165	1.54411	1.28334	1.85731	1.95624	2.69092	2.69271	2.95037	3.07204	1.58043	2.67246	1.09203	+	0	323.31	5354500000	297	28	28	28	545	545	62.609	61.7	3.00907	-1.09203	-5.05811	N1LYU4	N1LYU4	>tr|N1LYU4|N1LYU4_9BACI COG0076: Glutamate decarboxylase and related PLP-dependent proteins OS=Bacillus sp. GeD10 GN=EBGED10_51730 PE=3 SV=1	N1LYU4		COG0076: Glutamate decarboxylase and related PLP-dependent proteins	>tr|N1LYU4|N1LYU4_9BACI COG0076: Glutamate decarboxylase and related PLP-dependent proteins OS=Bacillus sp. GeD10	EBGED10_51730
	N1LV47		bged01866	Glycosyl transferase, group 1 family protein	EBGED10_38420	K00754		1.09035	2.00274	0.00993702		+	-0.391647	-0.283322	-0.774042	0.273528	-0.59287	-0.341407	1.00106	0.926812	0.977303	1.11963	-0.353671	0.736678	1.09035	+	0	155.12	2872300000	76	8	8	8	381	381	42.85	43.6	2.00274	-1.09035	-3.35964	N1LV47	N1LV47	>tr|N1LV47|N1LV47_9BACI Glycosyl transferase, group 1 family protein OS=Bacillus sp. GeD10 GN=EBGED10_38420 PE=4 SV=1	N1LV47		Glycosyl transferase, group 1 family protein	>tr|N1LV47|N1LV47_9BACI Glycosyl transferase, group 1 family protein OS=Bacillus sp. GeD10	EBGED10_38420
	N1LZC0		bged00510	Putative GTP cyclohydrolase 1 type 2	EBGED10_51130	K11022		1.07172	1.51765	0.0303636		+	-0.290018	-1.2035	-1.82677	-0.665729	-1.53051	-0.0650819	-1.16811	0.279608	0.441231	0.354438	-1.10331	-0.0315838	1.07172	+	0	108.01	1195200000	71	9	9	9	373	373	40.806	39.1	1.51765	-1.07172	-2.62606	N1LZC0	N1LZC0	>tr|N1LZC0|N1LZC0_9BACI Putative GTP cyclohydrolase 1 type 2 OS=Bacillus sp. GeD10 GN=EBGED10_51130 PE=3 SV=1	N1LZC0		Putative GTP cyclohydrolase 1 type 2	>tr|N1LZC0|N1LZC0_9BACI Putative GTP cyclohydrolase 1 type 2 OS=Bacillus sp. GeD10	EBGED10_51130
	N1M0L1		bged00250	Pyruvate carboxylase	EBGED10_55680	K01958		1.07009	2.30903	0.0049087		+	5.46215	5.90199	5.74897	5.72686	5.77925	5.88296	7.02884	6.4989	7.30334	7.25562	5.72384	6.79393	1.07009	+	0	323.31	71640000000	2058	75	75	75	1148	1148	128.43	79.4	2.30903	-1.07009	-3.84551	N1M0L1	N1M0L1	>tr|N1M0L1|N1M0L1_9BACI Pyruvate carboxylase OS=Bacillus sp. GeD10 GN=EBGED10_55680 PE=4 SV=1	N1M0L1		Pyruvate carboxylase	>tr|N1M0L1|N1M0L1_9BACI Pyruvate carboxylase OS=Bacillus sp. GeD10	EBGED10_55680
	N1LR07		bged01364	Porphobilinogen deaminase	hemC	K01749		1.06897	2.07509	0.00841217		+	0.589142	1.03654	0.939279	1.27871	1.46271	2.02742	1.13507	2.32175	2.58168	2.58531	1.06128	2.13024	1.06897	+	0	317.69	5169900000	216	16	16	16	309	309	33.791	65	2.07509	-1.06897	-3.47247	N1LR07	N1LR07	>tr|N1LR07|N1LR07_9BACI Porphobilinogen deaminase OS=Bacillus sp. GeD10 GN=hemC PE=3 SV=1	N1LR07		Porphobilinogen deaminase	>tr|N1LR07|N1LR07_9BACI Porphobilinogen deaminase OS=Bacillus sp. GeD10	hemC
	N1LJM2		bged00968	Chaperone protein ClpB	clpB	K03695		1.06748	2.29263	0.00509763		+	2.48006	2.70508	2.8767	2.75512	2.78146	2.89469	3.51744	3.87924	4.21039	4.43406	2.71968	3.78716	1.06748	+	0	323.31	10325000000	501	39	39	39	866	866	97.381	58.8	2.29263	-1.06748	-3.81891	N1LJM2	N1LJM2	>tr|N1LJM2|N1LJM2_9BACI Chaperone protein ClpB OS=Bacillus sp. GeD10 GN=clpB PE=3 SV=1	N1LJM2		Chaperone protein ClpB	>tr|N1LJM2|N1LJM2_9BACI Chaperone protein ClpB OS=Bacillus sp. GeD10	clpB
	N1LJR9		bged03160	Beta-1,3-glucosyltransferase	EBGED10_17290	K16698		1.06421	2.0564	0.0087822		+	-2.42594	-2.66713	-2.18015	-2.09082	-1.46874	-2.01889	-0.875501	-0.748162	-0.819308	-1.04986	-2.16655	-1.10234	1.06421	+	0	109.07	528770000	32	9	9	9	326	326	38.363	36.8	2.0564	-1.06421	-3.44321	N1LJR9	N1LJR9	>tr|N1LJR9|N1LJR9_9BACI Beta-1,3-glucosyltransferase OS=Bacillus sp. GeD10 GN=EBGED10_17290 PE=4 SV=1	N1LJR9		Beta-1,3-glucosyltransferase	>tr|N1LJR9|N1LJR9_9BACI Beta-1,3-glucosyltransferase OS=Bacillus sp. GeD10	EBGED10_17290
	N1LU72		bged00662	Endonuclease MutS2	mutS2	K07456		1.06095	2.82472	0.00149719		+	-0.815551	-0.803217	-0.333998	-0.459134	-0.204524	-0.134453	0.470278	0.993026	0.67446	0.685009	-0.523285	0.537664	1.06095	+	0	144.42	869610000	60	17	17	17	786	786	88.201	37.8	2.82472	-1.06095	-4.72257	N1LU72	N1LU72	>tr|N1LU72|N1LU72_9BACI Endonuclease MutS2 OS=Bacillus sp. GeD10 GN=mutS2 PE=3 SV=1	N1LU72		Endonuclease MutS2	>tr|N1LU72|N1LU72_9BACI Endonuclease MutS2 OS=Bacillus sp. GeD10	mutS2
	N1LX98		bged00647	Putative cytochrome P450 hydroxylase	EBGED10_46120	K00517		1.05623	3.53622	0.000290922		+	-0.780003	-0.199021	-0.493629	0.0102316	-0.0758463	0.653384	0.784032	0.726247	0.504961	1.07428	-0.307653	0.74858	1.05623	+	0	271.73	1931500000	110	20	20	20	411	411	47.12	60.6	3.53622	-1.05623	-6.09546	N1LX98	N1LX98	>tr|N1LX98|N1LX98_9BACI Putative cytochrome P450 hydroxylase OS=Bacillus sp. GeD10 GN=EBGED10_46120 PE=3 SV=1	N1LX98		Putative cytochrome P450 hydroxylase	>tr|N1LX98|N1LX98_9BACI Putative cytochrome P450 hydroxylase OS=Bacillus sp. GeD10	EBGED10_46120
	N1LI96		bged00172	Nucleoid occlusion protein	noc	K03497		1.05528	1.92463	0.0118952		+	-1.40592	-0.839029	-0.666298	-0.533076	-0.244336	-0.302828	-0.231255	1.05784	0.374308	0.689664	-0.737732	0.317546	1.05528	+	0	149.86	1773100000	80	13	13	13	290	290	33.617	46.2	1.92463	-1.05528	-3.23901	N1LI96	N1LI96	>tr|N1LI96|N1LI96_9BACI Nucleoid occlusion protein OS=Bacillus sp. GeD10 GN=noc PE=3 SV=1	N1LI96		Nucleoid occlusion protein	>tr|N1LI96|N1LI96_9BACI Nucleoid occlusion protein OS=Bacillus sp. GeD10	noc
	N1LVG2		bged03224	Arginine utilization protein RocB	EBGED10_39520	K01438		1.0475	1.68281	0.020758		+	-1.29747	NaN	-1.09396	-1.34072	-0.918049	-1.20452	-0.127023	-0.136347	0.429816	0.46285	-1.16255	-0.115044	1.0475	+	0	53.508	700470000	51	8	8	8	546	546	62.215	18.3	1.68281	-1.0475	-2.97169	N1LVG2	N1LVG2	>tr|N1LVG2|N1LVG2_9BACI Arginine utilization protein RocB OS=Bacillus sp. GeD10 GN=EBGED10_39520 PE=4 SV=1	N1LVG2		Arginine utilization protein RocB	>tr|N1LVG2|N1LVG2_9BACI Arginine utilization protein RocB OS=Bacillus sp. GeD10	EBGED10_39520
	N1LKT8		bged01178	Glucose-1-phosphate adenylyltransferase	glgC	K00975		1.04471	1.67795	0.020992		+	0.926518	1.04464	1.56843	1.28297	1.45293	0.962519	2.91428	2.67295	2.43709	2.51218	1.2551	2.2998	1.04471	+	0	323.31	6159500000	253	22	22	22	367	367	41.089	75.2	1.67795	-1.04471	-2.86492	N1LKT8	N1LKT8	>tr|N1LKT8|N1LKT8_9BACI Glucose-1-phosphate adenylyltransferase OS=Bacillus sp. GeD10 GN=glgC PE=3 SV=1	N1LKT8		Glucose-1-phosphate adenylyltransferase	>tr|N1LKT8|N1LKT8_9BACI Glucose-1-phosphate adenylyltransferase OS=Bacillus sp. GeD10	glgC
N1LEA2	N1LEA2		bged00025	Uncharacterized protein	EBGED10_5150	K14060		1.04359	2.08194	0.00828054		+	-3.48706	-4.27772	-3.70171	-3.22267	NaN	NaN	-3.01581	-2.60482	-2.60991	-2.28425	-3.67229	-2.6287	1.04359	+	0	52.893	280220000	21	NaN	4	8	NaN	225	26.465	24.4	2.08194	-1.04359	-3.86847	N1LEA2;N1LJM5	N1LEA2	>tr|N1LEA2|N1LEA2_9BACI Uncharacterized protein OS=Bacillus sp. GeD10 GN=EBGED10_5150 PE=4 SV=1	N1LEA2		Uncharacterized protein	>tr|N1LEA2|N1LEA2_9BACI Uncharacterized protein OS=Bacillus sp. GeD10	EBGED10_5150
	N1LRE1		bged02350	Transcriptional regulator LytR	lytR	K06994		1.04297	1.5156	0.0305073		+	-2.73245	-2.50033	-2.6468	-2.12587	-1.9534	-2.57394	-1.627	-0.350333	-1.13854	-1.0542	-2.39177	-1.3488	1.04297	+	0	99.134	615210000	28	11	11	11	304	304	33.83	47.7	1.5156	-1.04297	-2.62302	N1LRE1	N1LRE1	>tr|N1LRE1|N1LRE1_9BACI Transcriptional regulator LytR OS=Bacillus sp. GeD10 GN=lytR PE=3 SV=1	N1LRE1		Transcriptional regulator LytR	>tr|N1LRE1|N1LRE1_9BACI Transcriptional regulator LytR OS=Bacillus sp. GeD10	lytR
	N1LEK6		bged00541	Aspartokinase	EBGED10_6160	K00928		1.03873	2.60929	0.00245873		+	-2.03813	-1.60957	-1.30439	-1.28751	-0.961195	-0.333771	-1.00624	-0.195184	-0.329444	-0.142528	-1.44016	-0.401433	1.03873	+	0	80.498	412260000	57	10	10	10	409	409	44.426	34.7	2.60929	-1.03873	-4.34592	N1LEK6	N1LEK6	>tr|N1LEK6|N1LEK6_9BACI Aspartokinase OS=Bacillus sp. GeD10 GN=EBGED10_6160 PE=3 SV=1	N1LEK6		Aspartokinase	>tr|N1LEK6|N1LEK6_9BACI Aspartokinase OS=Bacillus sp. GeD10	EBGED10_6160
	N1M122		bged02138	Oligopeptide ABC transporter, periplasmic oligopeptide-binding protein OppA (TC 3.A.1.5.1)	EBGED10_57530	K15580		1.03565	3.57276	0.000267451		+	1.22257	1.19473	1.43156	1.61709	1.75926	2.18078	2.28209	2.62256	2.42519	2.89282	1.44504	2.48069	1.03565	+	0	323.31	5746800000	261	25	25	25	564	564	63.495	45	3.57276	-1.03565	-6.17209	N1M122	N1M122	>tr|N1M122|N1M122_9BACI Oligopeptide ABC transporter, periplasmic oligopeptide-binding protein OppA (TC 3.A.1.5.1) OS=Bacillus sp. GeD10 GN=EBGED10_57530 PE=4 SV=1	N1M122		Oligopeptide ABC transporter, periplasmic oligopeptide-binding protein OppA (TC 3.A.1.5.1)	>tr|N1M122|N1M122_9BACI Oligopeptide ABC transporter, periplasmic oligopeptide-binding protein OppA (TC 3.A.1.5.1) OS=Bacillus sp. GeD10	EBGED10_57530
	N1LVY6		#N/A	TPR-repeat-containing protein	EBGED10_38580	K12600		1.03362	2.79456	0.00160488		+	0.0476579	-0.165046	0.162458	0.309332	0.157737	0.486239	1.39215	1.72598	1.06143	1.01443	0.102428	1.13605	1.03362	+	0	266.42	2612500000	160	17	17	17	420	420	48.453	53.6	2.79456	-1.03362	-4.66886	N1LVY6	N1LVY6	>tr|N1LVY6|N1LVY6_9BACI TPR-repeat-containing protein OS=Bacillus sp. GeD10 GN=EBGED10_38580 PE=4 SV=1	N1LVY6		TPR-repeat-containing protein	>tr|N1LVY6|N1LVY6_9BACI TPR-repeat-containing protein OS=Bacillus sp. GeD10	EBGED10_38580
	N1LM61		bged03109	Oxidoreductase, Gfo/Idh/MocA family	EBGED10_7590	K16044		1.02536	2.79874	0.0015895		+	-2.00115	-1.11765	-1.79008	-1.16932	-1.17198	-0.64246	-0.596388	-0.0535938	-0.58986	-0.241101	-1.45004	-0.424681	1.02536	+	0	119.69	781470000	63	11	11	11	343	343	38.537	52.5	2.79874	-1.02536	-4.67629	N1LM61	N1LM61	>tr|N1LM61|N1LM61_9BACI Oxidoreductase, Gfo/Idh/MocA family OS=Bacillus sp. GeD10 GN=EBGED10_7590 PE=4 SV=1	N1LM61		Oxidoreductase, Gfo/Idh/MocA family	>tr|N1LM61|N1LM61_9BACI Oxidoreductase, Gfo/Idh/MocA family OS=Bacillus sp. GeD10	EBGED10_7590
	N1LNF5		#N/A	Fic family protein	EBGED10_14900	#N/A		1.01871	1.64408	0.0226945		+	0.442465	0.224718	0.822373	0.457939	1.47038	0.712521	2.30161	1.49524	1.77459	2.22747	0.683575	1.70229	1.01871	+	0	128.36	3415500000	121	11	11	11	347	347	40.543	43.8	1.64408	-1.01871	-2.81424	N1LNF5	N1LNF5	>tr|N1LNF5|N1LNF5_9BACI Fic family protein OS=Bacillus sp. GeD10 GN=EBGED10_14900 PE=4 SV=1	N1LNF5		Fic family protein	>tr|N1LNF5|N1LNF5_9BACI Fic family protein OS=Bacillus sp. GeD10	EBGED10_14900
	N1LWD4		bged00536	Asparagine synthetase [glutamine-hydrolyzing]	EBGED10_42920	K01953		1.01599	2.35751	0.00439024		+	3.57022	2.89983	3.07649	3.50937	3.57494	3.54093	4.50096	4.27151	4.61253	4.78487	3.32617	4.34216	1.01599	+	0	323.31	17629000000	603	41	41	41	633	633	73.411	69.2	2.35751	-1.01599	-3.92454	N1LWD4	N1LWD4	>tr|N1LWD4|N1LWD4_9BACI Asparagine synthetase [glutamine-hydrolyzing] OS=Bacillus sp. GeD10 GN=EBGED10_42920 PE=4 SV=1	N1LWD4		Asparagine synthetase [glutamine-hydrolyzing]	>tr|N1LWD4|N1LWD4_9BACI Asparagine synthetase [glutamine-hydrolyzing] OS=Bacillus sp. GeD10	EBGED10_42920
	N1LQG7		bged00999	Site-specific recombinase, phage integrase family	EBGED10_18800	K04763		1.01593	1.68151	0.0208205		+	NaN	-2.78667	-2.84992	-2.01434	-2.76783	-2.35612	NaN	-1.25664	-1.27786	-1.46442	-2.60469	-1.58876	1.01593	+	0	22.696	356780000	30	7	7	7	321	321	37.791	21.5	1.68151	-1.01593	-3.11107	N1LQG7	N1LQG7	>tr|N1LQG7|N1LQG7_9BACI Site-specific recombinase, phage integrase family OS=Bacillus sp. GeD10 GN=EBGED10_18800 PE=4 SV=1	N1LQG7		Site-specific recombinase, phage integrase family	>tr|N1LQG7|N1LQG7_9BACI Site-specific recombinase, phage integrase family OS=Bacillus sp. GeD10	EBGED10_18800
	N1LYQ0		bged02596	Threonine--tRNA ligase	thrS	K01868		1.01046	1.98838	0.0102712		+	4.68071	4.69451	4.87824	4.77233	4.99625	4.67392	5.92653	5.90581	6.28492	6.28315	4.80441	5.81487	1.01046	+	0	323.31	46011000000	889	40	40	40	645	645	73.997	65	1.98838	-1.01046	-3.33738	N1LYQ0	N1LYQ0	>tr|N1LYQ0|N1LYQ0_9BACI Threonine--tRNA ligase OS=Bacillus sp. GeD10 GN=thrS PE=3 SV=1	N1LYQ0		Threonine--tRNA ligase	>tr|N1LYQ0|N1LYQ0_9BACI Threonine--tRNA ligase OS=Bacillus sp. GeD10	thrS
	N1LTY1		bged03458	Carboxylesterase	EBGED10_34020	K03928		1.00446	1.50011	0.0316149		+	-0.511105	-0.499049	-0.0869348	-0.0612483	-0.272822	-0.650051	0.807238	1.64317	0.903641	0.887164	-0.286232	0.718232	1.00446	+	0	190.49	2730400000	132	12	12	12	247	247	28.259	67.6	1.50011	-1.00446	-2.60006	N1LTY1	N1LTY1	>tr|N1LTY1|N1LTY1_9BACI Carboxylesterase OS=Bacillus sp. GeD10 GN=EBGED10_34020 PE=4 SV=1	N1LTY1		Carboxylesterase	>tr|N1LTY1|N1LTY1_9BACI Carboxylesterase OS=Bacillus sp. GeD10	EBGED10_34020
	N1LRJ4		bged01193	Probable malate:quinone oxidoreductase	mqo	K00116		1.00244	1.79334	0.0160937		+	1.84155	1.08589	1.09341	0.830231	1.04263	1.11975	2.59881	2.63263	2.10718	2.44752	1.17874	2.18118	1.00244	+	0	322.16	5158700000	252	28	28	28	500	500	55.203	74.8	1.79334	-1.00244	-3.03875	N1LRJ4	N1LRJ4	>tr|N1LRJ4|N1LRJ4_9BACI Probable malate:quinone oxidoreductase OS=Bacillus sp. GeD10 GN=mqo PE=3 SV=1	N1LRJ4		Probable malate:quinone oxidoreductase	>tr|N1LRJ4|N1LRJ4_9BACI Probable malate:quinone oxidoreductase OS=Bacillus sp. GeD10	mqo
	N1LFP2		bged00094	Para-aminobenzoate synthase, aminase component	EBGED10_3190	K01665		1.0024	1.90691	0.0123904		+	-0.941299	-0.111554	-0.412332	-0.23753	-0.00606755	0.0131238	0.772349	1.55921	0.705254	0.253277	-0.341757	0.660642	1.0024	+	0	196.95	1421600000	71	15	15	15	465	465	53.153	46.2	1.90691	-1.0024	-3.21182	N1LFP2	N1LFP2	>tr|N1LFP2|N1LFP2_9BACI Para-aminobenzoate synthase, aminase component OS=Bacillus sp. GeD10 GN=EBGED10_3190 PE=4 SV=1	N1LFP2		Para-aminobenzoate synthase, aminase component	>tr|N1LFP2|N1LFP2_9BACI Para-aminobenzoate synthase, aminase component OS=Bacillus sp. GeD10	EBGED10_3190
	N1LQ17		bged02182	ATP-dependent RNA helicase DbpA	dbpA	K05592		1.00146	1.72297	0.0189247		+	-1.1978	-1.85884	-1.82163	-1.19587	-1.60395	-0.872852	-1.0847	-1.11354	0.000154862	0.400173	-1.53562	-0.534154	1.00146	+	0	30.589	614870000	43	10	10	10	481	481	54.231	36.2	1.72297	-1.00146	-2.93253	N1LQ17	N1LQ17	>tr|N1LQ17|N1LQ17_9BACI ATP-dependent RNA helicase DbpA OS=Bacillus sp. GeD10 GN=dbpA PE=3 SV=1	N1LQ17		ATP-dependent RNA helicase DbpA	>tr|N1LQ17|N1LQ17_9BACI ATP-dependent RNA helicase DbpA OS=Bacillus sp. GeD10	dbpA
	N1LK01		bged02194	Succinate dehydrogenase flavoprotein subunit	EBGED10_23370	K00239		1.0006	3.32439	0.000473814		+	4.82744	4.65632	4.62308	4.68968	4.87536	5.07381	5.81254	5.82891	5.939	6.02064	4.73438	5.73498	1.0006	+	0	323.31	43254000000	1127	44	44	44	597	597	65.938	84.3	3.32439	-1.0006	-5.66375	N1LK01	N1LK01	>tr|N1LK01|N1LK01_9BACI Succinate dehydrogenase flavoprotein subunit OS=Bacillus sp. GeD10 GN=EBGED10_23370 PE=4 SV=1	N1LK01		Succinate dehydrogenase flavoprotein subunit	>tr|N1LK01|N1LK01_9BACI Succinate dehydrogenase flavoprotein subunit OS=Bacillus sp. GeD10	EBGED10_23370
	N1LUM4		bged02266	RNA polymerase sigma factor SigA	sigA	K03086		0.993979	3.25629	0.000554256		+	2.76444	2.19999	2.66489	2.41809	2.55263	3.09632	3.62597	3.92399	3.67534	3.24831	2.52001	3.51399	0.993979	+	0	323.31	11891000000	283	18	18	18	375	375	43.285	54.7	3.25629	-0.993979	-5.52934	N1LUM4	N1LUM4	>tr|N1LUM4|N1LUM4_9BACI RNA polymerase sigma factor SigA OS=Bacillus sp. GeD10 GN=sigA PE=3 SV=1	N1LUM4		RNA polymerase sigma factor SigA	>tr|N1LUM4|N1LUM4_9BACI RNA polymerase sigma factor SigA OS=Bacillus sp. GeD10	sigA
	N1LMQ2		bged02184	Adenine deaminase	EBGED10_9200	K01486		0.989011	3.70348	0.000197936		+	-1.66226	-1.70086	-1.64626	-1.62204	-1.68868	NaN	-0.888425	-0.968667	-0.562128	-0.280817	-1.66402	-0.675009	0.989011	+	0	51.387	353300000	29	6	6	6	584	584	66.784	15.1	3.70348	-0.989011	-7.0752	N1LMQ2	N1LMQ2	>tr|N1LMQ2|N1LMQ2_9BACI Adenine deaminase OS=Bacillus sp. GeD10 GN=EBGED10_9200 PE=4 SV=1	N1LMQ2		Adenine deaminase	>tr|N1LMQ2|N1LMQ2_9BACI Adenine deaminase OS=Bacillus sp. GeD10	EBGED10_9200
	N1LSC7		bged02291	FIG146085: 3-to-5 oligoribonuclease A, Bacillus type	EBGED10_48500	K06881		0.986981	2.78578	0.00163765		+	1.43067	1.28183	1.44082	1.97683	1.69582	1.86428	2.76984	2.68998	2.6706	2.76618	1.56519	2.55217	0.986981	+	0	323.31	5955700000	103	15	15	15	356	356	40.447	66.3	2.78578	-0.986981	-4.65329	N1LSC7	N1LSC7	>tr|N1LSC7|N1LSC7_9BACI FIG146085: 3-to-5 oligoribonuclease A, Bacillus type OS=Bacillus sp. GeD10 GN=EBGED10_48500 PE=4 SV=1	N1LSC7		FIG146085: 3-to-5 oligoribonuclease A, Bacillus type	>tr|N1LSC7|N1LSC7_9BACI FIG146085: 3-to-5 oligoribonuclease A, Bacillus type OS=Bacillus sp. GeD10	EBGED10_48500
	N1LUU2		bged00253	DNA mismatch repair protein MutS	mutS	K03555		0.985104	1.79839	0.0159077		+	1.66995	2.05145	2.17106	2.22738	2.3031	1.99623	3.11081	2.95078	3.56846	3.72218	2.08459	3.06969	0.985104	+	0	323.31	6506900000	281	35	35	35	890	890	100.87	49.2	1.79839	-0.985104	-3.04641	N1LUU2	N1LUU2	>tr|N1LUU2|N1LUU2_9BACI DNA mismatch repair protein MutS OS=Bacillus sp. GeD10 GN=mutS PE=3 SV=1	N1LUU2		DNA mismatch repair protein MutS	>tr|N1LUU2|N1LUU2_9BACI DNA mismatch repair protein MutS OS=Bacillus sp. GeD10	mutS
	N1LL15		bged00609	Glutamine--fructose-6-phosphate aminotransferase [isomerizing]	glmS	K00820		0.984358	3.36312	0.000433393		+	4.53656	4.2968	4.18555	4.49091	4.56888	4.8141	5.42499	5.56748	5.47955	5.71438	4.41574	5.4001	0.984358	+	0	323.31	32650000000	830	36	36	36	600	600	65.792	64.3	3.36312	-0.984358	-5.74111	N1LL15	N1LL15	>tr|N1LL15|N1LL15_9BACI Glutamine--fructose-6-phosphate aminotransferase [isomerizing] OS=Bacillus sp. GeD10 GN=glmS PE=3 SV=1	N1LL15		Glutamine--fructose-6-phosphate aminotransferase [isomerizing]	>tr|N1LL15|N1LL15_9BACI Glutamine--fructose-6-phosphate aminotransferase [isomerizing] OS=Bacillus sp. GeD10	glmS
	N1LFL4		bged02978	D-alanyl-D-alanine carboxypeptidase	EBGED10_9010	K07258		0.983818	1.59981	0.0251299		+	-2.4158	-2.01197	-1.94342	-1.73455	-1.72446	-2.21039	-1.17093	-0.475011	-0.652447	-0.402337	-1.96604	-0.982223	0.983818	+	0	36.188	611320000	58	NaN	9	9	NaN	438	48.13	25.6	1.59981	-0.983817	-2.74817	N1LFL4;N1LQQ9	N1LFL4	>tr|N1LFL4|N1LFL4_9BACI D-alanyl-D-alanine carboxypeptidase OS=Bacillus sp. GeD10 GN=EBGED10_9010 PE=3 SV=1	N1LFL4		D-alanyl-D-alanine carboxypeptidase	>tr|N1LFL4|N1LFL4_9BACI D-alanyl-D-alanine carboxypeptidase OS=Bacillus sp. GeD10	EBGED10_9010
	N1LMF5		bged02678	Lactate utilization protein C	lutC	K00782		0.981964	1.49659	0.0318718		+	-0.160754	-0.415876	-0.611524	-0.442836	-0.674361	-0.896191	0.814654	1.24497	0.770751	0.670286	-0.46107	0.520893	0.981964	+	0	172.21	2693800000	107	12	12	12	236	236	26.369	50	1.49659	-0.981964	-2.59485	N1LMF5	N1LMF5	>tr|N1LMF5|N1LMF5_9BACI Lactate utilization protein C OS=Bacillus sp. GeD10 GN=lutC PE=3 SV=1	N1LMF5		Lactate utilization protein C	>tr|N1LMF5|N1LMF5_9BACI Lactate utilization protein C OS=Bacillus sp. GeD10	lutC
	N1LN68		bged00759	Thioredoxin reductase	EBGED10_11350	K00384		0.97932	2.74938	0.00178082		+	5.48797	5.19539	5.18835	5.0019	4.86784	6.62753	5.56368	6.25069	6.32906	5.86709	5.14829	6.12761	0.97932	+	0	323.31	35296000000	573	22	22	22	318	318	34.656	79.2	2.74938	-0.97932	-4.58903	N1LN68	N1LN68	>tr|N1LN68|N1LN68_9BACI Thioredoxin reductase OS=Bacillus sp. GeD10 GN=EBGED10_11350 PE=3 SV=1	N1LN68		Thioredoxin reductase	>tr|N1LN68|N1LN68_9BACI Thioredoxin reductase OS=Bacillus sp. GeD10	EBGED10_11350
	N1LPH5		bged00766	Transketolase	EBGED10_18490	K00615		0.979062	2.00935	0.00978702		+	6.53112	6.20427	6.16425	6.10039	6.27905	6.20214	7.44853	7.31668	7.29859	7.90845	6.25582	7.23488	0.979062	+	0	323.31	118570000000	1867	49	49	49	666	666	72.413	84.8	2.00935	-0.979062	-3.3699	N1LPH5	N1LPH5	>tr|N1LPH5|N1LPH5_9BACI Transketolase OS=Bacillus sp. GeD10 GN=EBGED10_18490 PE=3 SV=1	N1LPH5		Transketolase	>tr|N1LPH5|N1LPH5_9BACI Transketolase OS=Bacillus sp. GeD10	EBGED10_18490
	N1LQG2		bged02013	Aluminum resistance protein	EBGED10_18750	K01758		0.975086	2.01867	0.00957912		+	-0.239083	-0.0856158	0.618537	0.666672	0.353709	0.468078	1.37593	1.55743	1.05766	1.73055	0.262844	1.23793	0.975086	+	0	152.77	1773000000	122	10	10	10	423	423	46.128	33.1	2.01867	-0.975086	-3.38439	N1LQG2	N1LQG2	>tr|N1LQG2|N1LQG2_9BACI Aluminum resistance protein OS=Bacillus sp. GeD10 GN=EBGED10_18750 PE=4 SV=1	N1LQG2		Aluminum resistance protein	>tr|N1LQG2|N1LQG2_9BACI Aluminum resistance protein OS=Bacillus sp. GeD10	EBGED10_18750
	N1LIQ6		#N/A	Transcriptional regulator, TrmB family	EBGED10_13540	K01534		0.973388	4.45567	3.50209e-05		+	-3.40727	NaN	-3.45785	-3.46061	-3.3178	NaN	NaN	-2.47445	-2.53482	-2.30321	-3.41088	-2.43749	0.973388	+	0	13.723	193330000	30	5	5	5	252	252	29.164	23.8	4.45567	-0.973388	-13.8681	N1LIQ6	N1LIQ6	>tr|N1LIQ6|N1LIQ6_9BACI Transcriptional regulator, TrmB family OS=Bacillus sp. GeD10 GN=EBGED10_13540 PE=4 SV=1	N1LIQ6		Transcriptional regulator, TrmB family	>tr|N1LIQ6|N1LIQ6_9BACI Transcriptional regulator, TrmB family OS=Bacillus sp. GeD10	EBGED10_13540
	N1LWK3		bged00157	Polyribonucleotide nucleotidyltransferase	pnp	K00962		0.972806	4.56882	2.69887e-05		+	5.92507	5.83237	5.63977	5.66789	5.73804	6.65188	6.50039	6.7381	6.67158	7.10523	5.76063	6.73343	0.972806	+	0	323.31	80619000000	1597	53	53	53	712	712	78.198	78.4	4.56882	-0.972806	-8.54945	N1LWK3	N1LWK3	>tr|N1LWK3|N1LWK3_9BACI Polyribonucleotide nucleotidyltransferase OS=Bacillus sp. GeD10 GN=pnp PE=3 SV=1	N1LWK3		Polyribonucleotide nucleotidyltransferase	>tr|N1LWK3|N1LWK3_9BACI Polyribonucleotide nucleotidyltransferase OS=Bacillus sp. GeD10	pnp
	N1LYF7		bged03348	Cysteine desulfurase	EBGED10_50070	K04487		0.972577	4.39018	4.07213e-05		+	-0.658911	-0.863475	-0.77449	-0.415554	-0.568063	0.0364396	0.324069	0.56024	0.451168	0.210477	-0.656098	0.316479	0.972577	+	0	289.77	1316600000	94	10	10	10	381	381	42.138	43.8	4.39018	-0.972577	-8.07795	N1LYF7	N1LYF7	>tr|N1LYF7|N1LYF7_9BACI Cysteine desulfurase OS=Bacillus sp. GeD10 GN=EBGED10_50070 PE=4 SV=1	N1LYF7		Cysteine desulfurase	>tr|N1LYF7|N1LYF7_9BACI Cysteine desulfurase OS=Bacillus sp. GeD10	EBGED10_50070
	N1LR98		bged01605	6,7-dimethyl-8-ribityllumazine synthase	ribH	K00794		0.966124	2.27139	0.00535317		+	-0.485239	-0.790656	-0.518849	-0.656478	-0.808	-0.0185698	-0.33227	0.218561	1.07356	0.630111	-0.651844	0.314279	0.966124	+	0	133.77	3040300000	85	8	8	8	153	153	16.249	64.7	2.27139	-0.966124	-3.78456	N1LR98	N1LR98	>tr|N1LR98|N1LR98_9BACI 6,7-dimethyl-8-ribityllumazine synthase OS=Bacillus sp. GeD10 GN=ribH PE=3 SV=1	N1LR98		6,7-dimethyl-8-ribityllumazine synthase	>tr|N1LR98|N1LR98_9BACI 6,7-dimethyl-8-ribityllumazine synthase OS=Bacillus sp. GeD10	ribH
	N1LTF3		bged02457	Aminopeptidase S (Leu, Val, Phe, Tyr preference)	EBGED10_47010	K01269		0.962472	1.79251	0.0161247		+	2.28485	2.2982	2.73699	2.18328	2.42699	2.26792	3.12111	3.63321	3.86101	3.85942	2.38606	3.34853	0.962472	+	0	323.31	12470000000	332	22	22	22	409	409	45.25	69.2	1.79251	-0.962471	-3.03749	N1LTF3	N1LTF3	>tr|N1LTF3|N1LTF3_9BACI Aminopeptidase S (Leu, Val, Phe, Tyr preference) OS=Bacillus sp. GeD10 GN=EBGED10_47010 PE=4 SV=1	N1LTF3		Aminopeptidase S (Leu, Val, Phe, Tyr preference)	>tr|N1LTF3|N1LTF3_9BACI Aminopeptidase S (Leu, Val, Phe, Tyr preference) OS=Bacillus sp. GeD10	EBGED10_47010
	N1LKZ9		bged00148	Lysine--tRNA ligase	lysS	K04567		0.959682	2.71292	0.00193678		+	3.77683	3.51676	3.83964	3.76457	4.18859	4.11852	4.94799	5.17532	4.96466	4.67831	3.81728	4.77696	0.959682	+	0	323.31	27544000000	1177	42	42	42	499	499	57.639	83	2.71292	-0.959682	-4.52512	N1LKZ9	N1LKZ9	>tr|N1LKZ9|N1LKZ9_9BACI Lysine--tRNA ligase OS=Bacillus sp. GeD10 GN=lysS PE=3 SV=1	N1LKZ9		Lysine--tRNA ligase	>tr|N1LKZ9|N1LKZ9_9BACI Lysine--tRNA ligase OS=Bacillus sp. GeD10	lysS
	N1LPC2		bged02421	Aldehyde dehydrogenase	EBGED10_31790	K00128		0.957536	1.79321	0.0160987		+	0.493981	1.07519	1.27431	0.998017	0.990099	0.801452	2.06121	2.40945	2.0854	2.26177	0.966321	1.92386	0.957536	+	0	323.31	3460000000	195	NaN	24	24	NaN	494	53.764	72.1	1.79321	-0.957536	-3.03855	N1LPC2;N1LQ21	N1LPC2	>tr|N1LPC2|N1LPC2_9BACI Aldehyde dehydrogenase OS=Bacillus sp. GeD10 GN=EBGED10_31790 PE=3 SV=1	N1LPC2		Aldehyde dehydrogenase	>tr|N1LPC2|N1LPC2_9BACI Aldehyde dehydrogenase OS=Bacillus sp. GeD10	EBGED10_31790
	N1LWZ8		bged02476	Oligoendopeptidase F	EBGED10_59460	K08602		0.952749	3.08154	0.000828811		+	4.30515	4.87865	4.78108	4.52437	4.66204	5.08661	5.52326	5.67324	5.5879	6.04402	4.63026	5.58301	0.952749	+	0	323.31	35379000000	800	42	42	42	608	608	70.199	77	3.08154	-0.952749	-5.19364	N1LWZ8	N1LWZ8	>tr|N1LWZ8|N1LWZ8_9BACI Oligoendopeptidase F OS=Bacillus sp. GeD10 GN=EBGED10_59460 PE=4 SV=1	N1LWZ8		Oligoendopeptidase F	>tr|N1LWZ8|N1LWZ8_9BACI Oligoendopeptidase F OS=Bacillus sp. GeD10	EBGED10_59460
	N1LZ35		bged02193	tRNA-specific 2-thiouridylase MnmA	mnmA	K00566		0.951856	2.43635	0.00366143		+	-0.640832	0.0748211	-0.0502941	0.319921	0.170775	0.392748	0.675039	1.19288	1.20744	1.16556	-0.0251218	0.926734	0.951856	+	0	283.45	2245200000	98	15	15	15	372	372	41.879	63.2	2.43635	-0.951856	-4.05447	N1LZ35	N1LZ35	>tr|N1LZ35|N1LZ35_9BACI tRNA-specific 2-thiouridylase MnmA OS=Bacillus sp. GeD10 GN=mnmA PE=3 SV=1	N1LZ35		tRNA-specific 2-thiouridylase MnmA	>tr|N1LZ35|N1LZ35_9BACI tRNA-specific 2-thiouridylase MnmA OS=Bacillus sp. GeD10	mnmA
	N1LYN8		bged01832	4-hydroxy-3-methylbut-2-enyl diphosphate reductase	ispH	K03527		0.94858	2.02934	0.00934666		+	-1.90476	-1.51701	-1.817	-1.30938	-1.44875	-1.51878	-0.912937	-0.131485	-0.453391	-0.23741	-1.59938	-0.6508	0.94858	+	0	180.42	886280000	76	15	15	15	316	316	35.007	64.6	2.02934	-0.94858	-3.401	N1LYN8	N1LYN8	>tr|N1LYN8|N1LYN8_9BACI 4-hydroxy-3-methylbut-2-enyl diphosphate reductase OS=Bacillus sp. GeD10 GN=ispH PE=3 SV=1	N1LYN8		4-hydroxy-3-methylbut-2-enyl diphosphate reductase	>tr|N1LYN8|N1LYN8_9BACI 4-hydroxy-3-methylbut-2-enyl diphosphate reductase OS=Bacillus sp. GeD10	ispH
	N1LW69		bged01684	tRNA pseudouridine synthase B	truB	K03177		0.946763	4.99389	1.01416e-05		+	-1.41915	-1.20232	-1.12954	-1.18601	-1.20802	-0.301477	-0.556138	-0.179182	-0.0550747	-0.319348	-1.22901	-0.282244	0.946763	+	0	91.109	938500000	55	10	10	10	307	307	34.627	33.2	4.99389	-0.946763	-9.76406	N1LW69	N1LW69	>tr|N1LW69|N1LW69_9BACI tRNA pseudouridine synthase B OS=Bacillus sp. GeD10 GN=truB PE=3 SV=1	N1LW69		tRNA pseudouridine synthase B	>tr|N1LW69|N1LW69_9BACI tRNA pseudouridine synthase B OS=Bacillus sp. GeD10	truB
	N1LUI4		bged00404	Transcriptional regulator, GntR family domain / Aspartate aminotransferase	EBGED10_36370	K18907		0.943134	1.72727	0.0187382		+	-2.37585	NaN	NaN	-1.54405	-2.18109	NaN	-1.21676	-1.00035	-0.721277	-1.42372	-2.03366	-1.09053	0.943134	+	0	110.31	413430000	25	4	4	4	473	473	54.132	12.9	1.72727	-0.943134	-3.42492	N1LUI4	N1LUI4	>tr|N1LUI4|N1LUI4_9BACI Transcriptional regulator, GntR family domain / Aspartate aminotransferase OS=Bacillus sp. GeD10 GN=EBGED10_36370 PE=4 SV=1	N1LUI4		Transcriptional regulator, GntR family domain / Aspartate aminotransferase	>tr|N1LUI4|N1LUI4_9BACI Transcriptional regulator, GntR family domain / Aspartate aminotransferase OS=Bacillus sp. GeD10	EBGED10_36370
	N1LUK0		bged02420	Aldehyde-alcohol dehydrogenase	EBGED10_50340	K04072		0.939696	2.81933	0.0015159		+	4.82319	5.26722	5.20293	5.12735	5.00692	5.41791	6.0986	5.85462	6.47764	6.27732	5.08552	6.02522	0.939696	+	0	323.31	45261000000	1222	53	53	53	867	867	95.221	72.7	2.81933	-0.939696	-4.71294	N1LUK0	N1LUK0	>tr|N1LUK0|N1LUK0_9BACI Aldehyde-alcohol dehydrogenase OS=Bacillus sp. GeD10 GN=EBGED10_50340 PE=3 SV=1	N1LUK0		Aldehyde-alcohol dehydrogenase	>tr|N1LUK0|N1LUK0_9BACI Aldehyde-alcohol dehydrogenase OS=Bacillus sp. GeD10	EBGED10_50340
	N1LH82		bged00136	Acetolactate synthase, catabolic	EBGED10_6200	K01652		0.936953	1.63097	0.0233902		+	-1.41821	-0.875584	-0.501602	-1.20982	-0.653187	NaN	-0.623398	0.801601	-0.163336	0.00622032	-0.931681	0.00527185	0.936953	+	0	186.6	955190000	71	19	19	19	562	562	60.875	45.2	1.63097	-0.936953	-2.88778	N1LH82	N1LH82	>tr|N1LH82|N1LH82_9BACI Acetolactate synthase, catabolic OS=Bacillus sp. GeD10 GN=EBGED10_6200 PE=3 SV=1	N1LH82		Acetolactate synthase, catabolic	>tr|N1LH82|N1LH82_9BACI Acetolactate synthase, catabolic OS=Bacillus sp. GeD10	EBGED10_6200
	N1LQZ6		#N/A	TPR repeat protein	EBGED10_23690	#N/A		0.936359	2.51167	0.00307845		+	-2.2958	-1.99468	-2.36088	NaN	-1.91148	NaN	-1.01711	-0.847868	-1.42577	-1.52664	-2.14071	-1.20435	0.936359	+	0	52.281	479020000	38	11	11	11	332	332	38.756	39.5	2.51167	-0.936359	-4.77504	N1LQZ6	N1LQZ6	>tr|N1LQZ6|N1LQZ6_9BACI TPR repeat protein OS=Bacillus sp. GeD10 GN=EBGED10_23690 PE=4 SV=1	N1LQZ6		TPR repeat protein	>tr|N1LQZ6|N1LQZ6_9BACI TPR repeat protein OS=Bacillus sp. GeD10	EBGED10_23690
	N1LSN6		bged00783	Glycine--tRNA ligase	glyQS	K01880		0.933794	3.22467	0.000596108		+	3.97921	4.04011	4.12906	4.16015	4.07289	4.38028	5.30098	5.15939	5.24848	4.96126	4.07628	5.01008	0.933794	+	0	323.31	35516000000	647	43	43	43	458	458	52.977	88.9	3.22467	-0.933794	-5.46764	N1LSN6	N1LSN6	>tr|N1LSN6|N1LSN6_9BACI Glycine--tRNA ligase OS=Bacillus sp. GeD10 GN=glyQS PE=3 SV=1	N1LSN6		Glycine--tRNA ligase	>tr|N1LSN6|N1LSN6_9BACI Glycine--tRNA ligase OS=Bacillus sp. GeD10	glyQS
	N1LKJ7		bged03187	N-acyl homoserine lactone hydrolase	EBGED10_1410	K13075		0.931877	2.01902	0.00957159		+	-1.62198	-1.23376	-2.32408	-1.16115	-1.63598	-0.490083	NaN	-0.387635	-0.780926	-0.995408	-1.59539	-0.663513	0.931877	+	0	137.51	858910000	36	7	7	7	250	250	28.101	49.6	2.01902	-0.931877	-3.53204	N1LKJ7	N1LKJ7	>tr|N1LKJ7|N1LKJ7_9BACI N-acyl homoserine lactone hydrolase OS=Bacillus sp. GeD10 GN=EBGED10_1410 PE=4 SV=1	N1LKJ7		N-acyl homoserine lactone hydrolase	>tr|N1LKJ7|N1LKJ7_9BACI N-acyl homoserine lactone hydrolase OS=Bacillus sp. GeD10	EBGED10_1410
N1LRT9	N1LRT9		#N/A	Uncharacterized protein	EBGED10_23650	#N/A		0.93054	1.63997	0.0229101		+	-1.56221	-0.855655	-0.981918	-0.795935	-0.687063	-1.02841	-0.0279374	0.251962	-0.18505	0.759344	-0.976557	-0.0460176	0.93054	+	0	127.06	1705800000	113	10	10	10	204	204	23.663	59.3	1.63997	-0.93054	-2.8081	N1LRT9	N1LRT9	>tr|N1LRT9|N1LRT9_9BACI Uncharacterized protein OS=Bacillus sp. GeD10 GN=EBGED10_23650 PE=4 SV=1	N1LRT9		Uncharacterized protein	>tr|N1LRT9|N1LRT9_9BACI Uncharacterized protein OS=Bacillus sp. GeD10	EBGED10_23650
	N1LPA1		bged00186	tRNA uridine 5-carboxymethylaminomethyl modification enzyme MnmG	mnmG	K03495		0.919707	3.75181	0.00017709		+	3.15259	3.18317	3.18661	3.34808	3.35947	3.86329	3.95625	4.04237	4.51246	4.45407	3.24598	4.16569	0.919707	+	0	323.31	11839000000	538	31	31	31	629	629	70.293	66	3.75181	-0.919707	-6.55743	N1LPA1	N1LPA1	>tr|N1LPA1|N1LPA1_9BACI tRNA uridine 5-carboxymethylaminomethyl modification enzyme MnmG OS=Bacillus sp. GeD10 GN=mnmG PE=3 SV=1	N1LPA1		tRNA uridine 5-carboxymethylaminomethyl modification enzyme MnmG	>tr|N1LPA1|N1LPA1_9BACI tRNA uridine 5-carboxymethylaminomethyl modification enzyme MnmG OS=Bacillus sp. GeD10	mnmG
	N1LK80		bged02186	Methionine--tRNA ligase	metG	K01874		0.916869	1.78118	0.0165509		+	4.18957	4.20545	4.14499	4.00974	4.16521	3.95837	4.90748	5.35206	5.40957	5.67184	4.14299	5.05986	0.916869	+	0	323.31	24885000000	817	50	50	50	660	660	75.23	75.9	1.78118	-0.916869	-3.02034	N1LK80	N1LK80	>tr|N1LK80|N1LK80_9BACI Methionine--tRNA ligase OS=Bacillus sp. GeD10 GN=metG PE=3 SV=1	N1LK80		Methionine--tRNA ligase	>tr|N1LK80|N1LK80_9BACI Methionine--tRNA ligase OS=Bacillus sp. GeD10	metG
	N1LGA7		bged02540	NAD-dependent malic enzyme	EBGED10_11580	K00027		0.903041	2.75579	0.00175471		+	0.946794	1.17817	1.59684	1.2183	1.4807	1.70309	2.08753	2.07073	2.50702	2.56765	1.28416	2.1872	0.903041	+	0	323.31	3414800000	199	28	28	28	570	570	62.301	67.4	2.75579	-0.903041	-4.60032	N1LGA7	N1LGA7	>tr|N1LGA7|N1LGA7_9BACI NAD-dependent malic enzyme OS=Bacillus sp. GeD10 GN=EBGED10_11580 PE=3 SV=1	N1LGA7		NAD-dependent malic enzyme	>tr|N1LGA7|N1LGA7_9BACI NAD-dependent malic enzyme OS=Bacillus sp. GeD10	EBGED10_11580
	N1M105		bged02072	Peptidase, M16 family	EBGED10_57280	K01408		0.900438	2.50706	0.00311127		+	0.827643	1.31576	1.48328	1.14835	1.36058	1.74854	1.73171	2.11176	2.34803	2.69776	1.22712	2.12756	0.900438	+	0	202.88	4966100000	172	19	19	19	428	428	49.118	55.6	2.50706	-0.900438	-4.17254	N1M105	N1M105	>tr|N1M105|N1M105_9BACI Peptidase, M16 family OS=Bacillus sp. GeD10 GN=EBGED10_57280 PE=3 SV=1	N1M105		Peptidase, M16 family	>tr|N1M105|N1M105_9BACI Peptidase, M16 family OS=Bacillus sp. GeD10	EBGED10_57280
	N1LDQ4		bged00582	ATP-dependent zinc metalloprotease FtsH	ftsH	K03798		0.892493	1.59264	0.0255484		+	2.96378	3.17834	3.54386	2.90693	3.02759	2.81235	4.16301	4.46447	4.37757	4.26558	3.1241	4.01659	0.892493	+	0	323.31	11731000000	293	27	27	27	633	633	70.198	55.8	1.59264	-0.892493	-2.73749	N1LDQ4	N1LDQ4	>tr|N1LDQ4|N1LDQ4_9BACI ATP-dependent zinc metalloprotease FtsH OS=Bacillus sp. GeD10 GN=ftsH PE=3 SV=1	N1LDQ4		ATP-dependent zinc metalloprotease FtsH	>tr|N1LDQ4|N1LDQ4_9BACI ATP-dependent zinc metalloprotease FtsH OS=Bacillus sp. GeD10	ftsH
	N1LYY0		bged00982	3-hydroxyacyl-[acyl-carrier-protein] dehydratase FabZ	fabZ	K02372		0.888162	2.10276	0.00789305		+	3.04027	3.27641	3.66854	3.25536	3.49757	4.07431	3.67042	4.26595	4.10801	5.06028	3.34763	4.23579	0.888162	+	0	199.13	13832000000	233	13	13	13	144	144	15.965	83.3	2.10276	-0.888162	-3.51591	N1LYY0	N1LYY0	>tr|N1LYY0|N1LYY0_9BACI 3-hydroxyacyl-[acyl-carrier-protein] dehydratase FabZ OS=Bacillus sp. GeD10 GN=fabZ PE=3 SV=1	N1LYY0		3-hydroxyacyl-[acyl-carrier-protein] dehydratase FabZ	>tr|N1LYY0|N1LYY0_9BACI 3-hydroxyacyl-[acyl-carrier-protein] dehydratase FabZ OS=Bacillus sp. GeD10	fabZ
	N1LW47		bged01589	N-acetyldiaminopimelate deacetylase	EBGED10_55340	K05823		0.881881	1.98867	0.0102644		+	-0.37408	-0.248534	-0.27545	0.180133	-0.0897111	-0.176765	0.72003	1.27177	0.75236	1.03437	-0.161529	0.720353	0.881881	+	0	170.59	2052500000	89	8	8	8	376	376	42.172	38.3	1.98867	-0.881881	-3.33782	N1LW47	N1LW47	>tr|N1LW47|N1LW47_9BACI N-acetyldiaminopimelate deacetylase OS=Bacillus sp. GeD10 GN=EBGED10_55340 PE=3 SV=1	N1LW47		N-acetyldiaminopimelate deacetylase	>tr|N1LW47|N1LW47_9BACI N-acetyldiaminopimelate deacetylase OS=Bacillus sp. GeD10	EBGED10_55340
	N1LJQ6		bged00229	DNA integrity scanning protein DisA	disA	K07067		0.880879	1.94386	0.0113798		+	-0.833437	-1.19536	-0.862055	-0.656036	-0.841819	-0.933577	-0.0516925	0.511023	0.0971823	0.392752	-0.877741	0.00313751	0.880879	+	0	190.63	950650000	71	15	15	15	357	357	40.023	57.1	1.94386	-0.880879	-3.26861	N1LJQ6	N1LJQ6	>tr|N1LJQ6|N1LJQ6_9BACI DNA integrity scanning protein DisA OS=Bacillus sp. GeD10 GN=disA PE=3 SV=1	N1LJQ6		DNA integrity scanning protein DisA	>tr|N1LJQ6|N1LJQ6_9BACI DNA integrity scanning protein DisA OS=Bacillus sp. GeD10	disA
	N1LLP8		bged00788	Serine--tRNA ligase	serS	K01875		0.876837	1.83057	0.0147716		+	3.70724	3.25854	3.87065	3.68099	3.75747	3.48805	4.72349	4.91604	4.72017	4.81133	3.65498	4.53182	0.876837	+	0	323.31	28555000000	712	37	37	37	424	424	48.79	81.4	1.83057	-0.876837	-3.09525	N1LLP8	N1LLP8	>tr|N1LLP8|N1LLP8_9BACI Serine--tRNA ligase OS=Bacillus sp. GeD10 GN=serS PE=3 SV=1	N1LLP8		Serine--tRNA ligase	>tr|N1LLP8|N1LLP8_9BACI Serine--tRNA ligase OS=Bacillus sp. GeD10	serS
	N1LRP7		bged02497	Enoyl-CoA hydratase	EBGED10_23300	K13767		0.864017	2.43811	0.00364664		+	3.31699	4.05887	3.52548	3.8362	3.82493	4.84501	4.05046	4.62412	4.36964	4.99333	3.71249	4.57651	0.864017	+	0	323.31	29154000000	347	14	14	14	258	258	27.929	70.5	2.43811	-0.864017	-4.05739	N1LRP7	N1LRP7	>tr|N1LRP7|N1LRP7_9BACI Enoyl-CoA hydratase OS=Bacillus sp. GeD10 GN=EBGED10_23300 PE=3 SV=1	N1LRP7		Enoyl-CoA hydratase	>tr|N1LRP7|N1LRP7_9BACI Enoyl-CoA hydratase OS=Bacillus sp. GeD10	EBGED10_23300
	N1LS26		bged02460	Glutamyl aminopeptidase Deblocking aminopeptidase	EBGED10_41590	K01269		0.861326	2.13936	0.00725497		+	2.16334	2.77279	2.6395	2.85724	2.64832	2.83897	3.54433	3.19539	3.81512	3.99401	2.61624	3.47756	0.861326	+	0	323.31	13460000000	477	18	18	18	357	357	39.154	69.2	2.13936	-0.861327	-3.57365	N1LS26	N1LS26	>tr|N1LS26|N1LS26_9BACI Glutamyl aminopeptidase Deblocking aminopeptidase OS=Bacillus sp. GeD10 GN=EBGED10_41590 PE=4 SV=1	N1LS26		Glutamyl aminopeptidase Deblocking aminopeptidase	>tr|N1LS26|N1LS26_9BACI Glutamyl aminopeptidase Deblocking aminopeptidase OS=Bacillus sp. GeD10	EBGED10_41590
	N1LT68		bged02017	D-alanine aminotransferase	EBGED10_45390	K00824		0.8556	2.26836	0.00539059		+	-0.266891	-0.552275	-0.874758	-0.334587	-0.304542	0.0336152	-0.193918	0.720396	0.752815	0.63204	-0.466611	0.38899	0.8556	+	0	119.26	1895900000	79	11	11	11	290	290	33.338	49	2.26836	-0.8556	-3.77968	N1LT68	N1LT68	>tr|N1LT68|N1LT68_9BACI D-alanine aminotransferase OS=Bacillus sp. GeD10 GN=EBGED10_45390 PE=3 SV=1	N1LT68		D-alanine aminotransferase	>tr|N1LT68|N1LT68_9BACI D-alanine aminotransferase OS=Bacillus sp. GeD10	EBGED10_45390
	N1LU19		bged02258	Isocitrate dehydrogenase [NADP]	EBGED10_48640	K00031		0.853229	1.51173	0.0307802		+	5.49962	6.0181	6.28667	5.98543	6.03826	5.63902	7.02714	7.03508	7.31791	7.07507	5.96562	6.81885	0.853229	+	0	323.31	144570000000	1449	39	39	39	430	430	46.972	75.1	1.51173	-0.853229	-2.61728	N1LU19	N1LU19	>tr|N1LU19|N1LU19_9BACI Isocitrate dehydrogenase [NADP] OS=Bacillus sp. GeD10 GN=EBGED10_48640 PE=3 SV=1	N1LU19		Isocitrate dehydrogenase [NADP]	>tr|N1LU19|N1LU19_9BACI Isocitrate dehydrogenase [NADP] OS=Bacillus sp. GeD10	EBGED10_48640
	N1LV21		bged01955	ABC transporter, ATP-binding protein	EBGED10_58150	K01552		0.850438	2.28623	0.0051733		+	4.29475	4.18444	4.46678	4.21136	4.48803	4.371	5.4705	5.17961	5.28854	5.58791	4.32907	5.17951	0.850438	+	0	323.31	30870000000	655	37	37	37	541	541	61.131	78.9	2.28623	-0.850437	-3.80855	N1LV21	N1LV21	>tr|N1LV21|N1LV21_9BACI ABC transporter, ATP-binding protein OS=Bacillus sp. GeD10 GN=EBGED10_58150 PE=4 SV=1	N1LV21		ABC transporter, ATP-binding protein	>tr|N1LV21|N1LV21_9BACI ABC transporter, ATP-binding protein OS=Bacillus sp. GeD10	EBGED10_58150
	N1LKR8		bged01502	Aminomethyltransferase	gcvT	K00605		0.849755	2.46702	0.00341177		+	4.18669	5.07298	4.63323	4.93752	5.14264	5.86932	5.26854	5.5766	5.85813	5.64925	4.79461	5.64437	0.849755	+	0	323.31	41710000000	1033	31	31	31	366	366	40.254	82	2.46702	-0.849754	-4.1055	N1LKR8	N1LKR8	>tr|N1LKR8|N1LKR8_9BACI Aminomethyltransferase OS=Bacillus sp. GeD10 GN=gcvT PE=3 SV=1	N1LKR8		Aminomethyltransferase	>tr|N1LKR8|N1LKR8_9BACI Aminomethyltransferase OS=Bacillus sp. GeD10	gcvT
	N1LMC1		bged01487	Gluconeogenesis factor	EBGED10_11390	K01689		0.84535	1.55021	0.02817		+	-0.36452	-1.08059	-0.988368	-0.124513	-0.521621	NaN	-0.383757	0.874735	0.219389	0.207341	-0.615923	0.229427	0.84535	+	0	154.42	1556700000	83	7	7	7	317	317	34.672	38.5	1.55021	-0.84535	-2.75817	N1LMC1	N1LMC1	>tr|N1LMC1|N1LMC1_9BACI Gluconeogenesis factor OS=Bacillus sp. GeD10 GN=EBGED10_11390 PE=3 SV=1	N1LMC1		Gluconeogenesis factor	>tr|N1LMC1|N1LMC1_9BACI Gluconeogenesis factor OS=Bacillus sp. GeD10	EBGED10_11390
	N1LXD6		bged02155	Oligopeptide ABC transporter, periplasmic oligopeptide-binding protein OppA (TC 3.A.1.5.1)	EBGED10_59390	K02035		0.841924	2.62854	0.00235212		+	0.545968	0.0974578	0.753485	0.877719	0.930745	1.17734	1.22377	1.74514	1.57504	1.69371	0.641075	1.483	0.841924	+	0	323.31	2660200000	179	21	21	22	548	548	61.993	41.4	2.62854	-0.841924	-4.37894	N1LXD6	N1LXD6	>tr|N1LXD6|N1LXD6_9BACI Oligopeptide ABC transporter, periplasmic oligopeptide-binding protein OppA (TC 3.A.1.5.1) OS=Bacillus sp. GeD10 GN=EBGED10_59390 PE=4 SV=1	N1LXD6		Oligopeptide ABC transporter, periplasmic oligopeptide-binding protein OppA (TC 3.A.1.5.1)	>tr|N1LXD6|N1LXD6_9BACI Oligopeptide ABC transporter, periplasmic oligopeptide-binding protein OppA (TC 3.A.1.5.1) OS=Bacillus sp. GeD10	EBGED10_59390
	N1LLN4		#N/A	Cell envelope-associated transcriptional attenuator LytR-CpsA-Psr, subfamily F2 (As in PMID19099556)	EBGED10_8830	K06994		0.840663	1.83167	0.0147344		+	-1.78277	-1.99181	-1.80568	-1.84257	-1.52318	-1.87444	-1.12942	-0.378997	-0.675606	-0.684229	-1.7892	-0.948539	0.840663	+	0	124.15	595550000	47	10	10	10	399	399	44.226	36.6	1.83167	-0.840663	-3.09692	N1LLN4	N1LLN4	>tr|N1LLN4|N1LLN4_9BACI Cell envelope-associated transcriptional attenuator LytR-CpsA-Psr, subfamily F2 (As in PMID19099556) OS=Bacillus sp. GeD10 GN=EBGED10_8830 PE=4 SV=1	N1LLN4		Cell envelope-associated transcriptional attenuator LytR-CpsA-Psr, subfamily F2 (As in PMID19099556)	>tr|N1LLN4|N1LLN4_9BACI Cell envelope-associated transcriptional attenuator LytR-CpsA-Psr, subfamily F2 (As in PMID19099556) OS=Bacillus sp. GeD10	EBGED10_8830
	N1LLU6		bged02187	Glutamate--tRNA ligase	gltX	K09698		0.835822	2.6122	0.00244229		+	3.33632	3.29432	3.45282	3.58673	3.66713	3.70596	4.45417	4.73737	4.49456	4.12437	3.46746	4.30329	0.835822	+	0	323.31	20507000000	720	26	26	26	491	491	56.257	56.4	2.6122	-0.835822	-4.35091	N1LLU6	N1LLU6	>tr|N1LLU6|N1LLU6_9BACI Glutamate--tRNA ligase OS=Bacillus sp. GeD10 GN=gltX PE=3 SV=1	N1LLU6		Glutamate--tRNA ligase	>tr|N1LLU6|N1LLU6_9BACI Glutamate--tRNA ligase OS=Bacillus sp. GeD10	gltX
	N1LRD9		bged01433	ATP-dependent Clp protease, ATP-binding subunit ClpC / Negative regulator of genetic competence clcC/mecB	EBGED10_22450	K03696		0.833613	1.97342	0.0106312		+	5.08035	4.70004	4.59536	4.89926	4.93833	4.92028	5.39973	5.809	5.97707	6.27533	4.84267	5.67628	0.833613	+	0	323.31	47382000000	1595	59	59	62	811	811	90.562	70	1.97342	-0.833613	-3.31422	N1LRD9	N1LRD9	>tr|N1LRD9|N1LRD9_9BACI ATP-dependent Clp protease, ATP-binding subunit ClpC / Negative regulator of genetic competence clcC/mecB OS=Bacillus sp. GeD10 GN=EBGED10_22450 PE=3 SV=1	N1LRD9		ATP-dependent Clp protease, ATP-binding subunit ClpC / Negative regulator of genetic competence clcC/mecB	>tr|N1LRD9|N1LRD9_9BACI ATP-dependent Clp protease, ATP-binding subunit ClpC / Negative regulator of genetic competence clcC/mecB OS=Bacillus sp. GeD10	EBGED10_22450
	N1LSP2		bged00626	Protein translocase subunit SecA	secA	K03070		0.827535	1.83826	0.0145124		+	3.88783	3.96899	4.02061	4.08039	4.21007	3.91073	4.94172	4.8321	5.15977	5.46125	4.03358	4.86111	0.827535	+	0	323.31	20820000000	921	50	50	50	835	835	95.02	67.3	1.83826	-0.827535	-3.10695	N1LSP2	N1LSP2	>tr|N1LSP2|N1LSP2_9BACI Protein translocase subunit SecA OS=Bacillus sp. GeD10 GN=secA PE=3 SV=1	N1LSP2		Protein translocase subunit SecA	>tr|N1LSP2|N1LSP2_9BACI Protein translocase subunit SecA OS=Bacillus sp. GeD10	secA
	N1M0A9		bged02274	Proline--tRNA ligase	proS	K01881		0.819023	1.64716	0.0225341		+	2.97383	2.91232	2.79646	3.17609	3.01397	2.71146	3.80719	4.04916	4.05196	4.34803	2.97454	3.79356	0.819023	+	0	323.31	10433000000	476	31	31	31	566	566	63.034	70.3	1.64716	-0.819023	-2.81884	N1M0A9	N1M0A9	>tr|N1M0A9|N1M0A9_9BACI Proline--tRNA ligase OS=Bacillus sp. GeD10 GN=proS PE=3 SV=1	N1M0A9		Proline--tRNA ligase	>tr|N1M0A9|N1M0A9_9BACI Proline--tRNA ligase OS=Bacillus sp. GeD10	proS
	N1LHR9		bged00989	Trehalose-6-phosphate hydrolase	EBGED10_16130	K01226		0.818326	1.55621	0.0277835		+	1.83299	1.418	1.46863	1.93994	2.07959	1.6477	2.24036	2.84568	2.93459	3.16247	1.74783	2.56616	0.818326	+	0	323.31	4693900000	329	33	33	33	553	553	65.505	63.3	1.55621	-0.818327	-2.6833	N1LHR9	N1LHR9	>tr|N1LHR9|N1LHR9_9BACI Trehalose-6-phosphate hydrolase OS=Bacillus sp. GeD10 GN=EBGED10_16130 PE=4 SV=1	N1LHR9		Trehalose-6-phosphate hydrolase	>tr|N1LHR9|N1LHR9_9BACI Trehalose-6-phosphate hydrolase OS=Bacillus sp. GeD10	EBGED10_16130
N1LRP4	N1LRP4		#N/A	Uncharacterized protein	EBGED10_26410	#N/A		0.811705	2.41266	0.00386667		+	-0.648742	-0.767691	-0.922737	-0.177629	-0.330554	0.555051	-0.235755	0.172043	0.163204	0.55663	-0.569471	0.242234	0.811705	+	0	153.53	1375000000	107	10	10	10	221	221	25.836	42.5	2.41266	-0.811705	-4.01525	N1LRP4	N1LRP4	>tr|N1LRP4|N1LRP4_9BACI Uncharacterized protein OS=Bacillus sp. GeD10 GN=EBGED10_26410 PE=4 SV=1	N1LRP4		Uncharacterized protein	>tr|N1LRP4|N1LRP4_9BACI Uncharacterized protein OS=Bacillus sp. GeD10	EBGED10_26410
	N1LTC0		bged02647	Peptidase T	pepT	K01258		0.807857	2.57826	0.00264085		+	1.03361	1.70449	1.58009	1.52363	1.51344	1.75731	2.16246	2.50169	2.37593	2.59715	1.47105	2.27891	0.807857	+	0	323.31	6361700000	364	17	17	17	412	412	46.082	64.8	2.57826	-0.807858	-4.29294	N1LTC0	N1LTC0	>tr|N1LTC0|N1LTC0_9BACI Peptidase T OS=Bacillus sp. GeD10 GN=pepT PE=3 SV=1	N1LTC0		Peptidase T	>tr|N1LTC0|N1LTC0_9BACI Peptidase T OS=Bacillus sp. GeD10	pepT
	N1LJT6		bged00745	Ribonucleoside-diphosphate reductase subunit beta	EBGED10_15120	K00526		0.799838	2.27794	0.00527306		+	1.43312	1.53377	1.99019	1.89705	2.29035	2.49958	2.44125	2.62779	3.17401	2.40105	1.8289	2.62873	0.799838	+	0	323.31	5535700000	165	14	14	14	322	322	37.003	58.4	2.27794	-0.799838	-3.79514	N1LJT6	N1LJT6	>tr|N1LJT6|N1LJT6_9BACI Ribonucleoside-diphosphate reductase subunit beta OS=Bacillus sp. GeD10 GN=EBGED10_15120 PE=3 SV=1	N1LJT6		Ribonucleoside-diphosphate reductase subunit beta	>tr|N1LJT6|N1LJT6_9BACI Ribonucleoside-diphosphate reductase subunit beta OS=Bacillus sp. GeD10	EBGED10_15120
N1LN30	N1LN30		#N/A	Uncharacterized protein	EBGED10_10950	#N/A		0.79895	1.96282	0.0108937		+	-1.27327	-0.783864	-0.61799	-0.661833	-0.64629	-0.789622	0.0306539	0.436028	0.126365	0.208077	-0.79665	0.00230045	0.79895	+	0	74.038	1094400000	90	14	14	14	346	346	41.919	45.1	1.96282	-0.79895	-3.29785	N1LN30	N1LN30	>tr|N1LN30|N1LN30_9BACI Uncharacterized protein OS=Bacillus sp. GeD10 GN=EBGED10_10950 PE=4 SV=1	N1LN30		Uncharacterized protein	>tr|N1LN30|N1LN30_9BACI Uncharacterized protein OS=Bacillus sp. GeD10	EBGED10_10950
	N1LPB3		bged00162	DNA gyrase subunit B	gyrB	K02470		0.798159	1.54768	0.0283347		+	3.18413	3.03244	3.00767	3.10652	3.29852	2.83032	3.9938	4.12871	4.05827	4.60897	3.12585	3.92401	0.798159	+	0	323.31	12671000000	602	37	37	37	640	640	71.832	60.2	1.54768	-0.798159	-2.67063	N1LPB3	N1LPB3	>tr|N1LPB3|N1LPB3_9BACI DNA gyrase subunit B OS=Bacillus sp. GeD10 GN=gyrB PE=3 SV=1	N1LPB3		DNA gyrase subunit B	>tr|N1LPB3|N1LPB3_9BACI DNA gyrase subunit B OS=Bacillus sp. GeD10	gyrB
	N1LX66		bged00994	D-alanine--poly(phosphoribitol) ligase subunit 1	dltA	K03367		0.797299	2.24074	0.00574466		+	1.96281	2.13404	2.37708	2.53233	2.44013	2.39577	3.37694	3.42008	3.20963	3.03046	2.28928	3.08658	0.797299	+	0	323.31	8041900000	384	21	21	21	504	504	56.493	56.3	2.24074	-0.797299	-3.73521	N1LX66	N1LX66	>tr|N1LX66|N1LX66_9BACI D-alanine--poly(phosphoribitol) ligase subunit 1 OS=Bacillus sp. GeD10 GN=dltA PE=3 SV=1	N1LX66		D-alanine--poly(phosphoribitol) ligase subunit 1	>tr|N1LX66|N1LX66_9BACI D-alanine--poly(phosphoribitol) ligase subunit 1 OS=Bacillus sp. GeD10	dltA
	N1LNW9		bged02008	Zinc ABC transporter, periplasmic-binding protein ZnuA	EBGED10_29940	K09815		0.787822	1.50284	0.0314165		+	NaN	NaN	-2.45139	-2.18435	NaN	NaN	-1.47877	NaN	-1.58133	NaN	-2.31787	-1.53005	0.787822	+	0	18.961	436940000	35	4	4	4	316	316	35.606	20.6	1.50284	-0.787822	-5.50803	N1LNW9	N1LNW9	>tr|N1LNW9|N1LNW9_9BACI Zinc ABC transporter, periplasmic-binding protein ZnuA OS=Bacillus sp. GeD10 GN=EBGED10_29940 PE=3 SV=1	N1LNW9		Zinc ABC transporter, periplasmic-binding protein ZnuA	>tr|N1LNW9|N1LNW9_9BACI Zinc ABC transporter, periplasmic-binding protein ZnuA OS=Bacillus sp. GeD10	EBGED10_29940
	N1LPW3		bged02461	Deblocking aminopeptidase	EBGED10_17060	K01269		0.784478	1.58373	0.0260775		+	2.86774	3.23685	2.84136	3.43633	3.14651	4.34512	2.88782	3.92545	3.97384	4.31895	3.10576	3.89024	0.784478	+	0	323.31	16881000000	679	21	21	21	349	349	38.907	67.3	1.58373	-0.784478	-2.72423	N1LPW3	N1LPW3	>tr|N1LPW3|N1LPW3_9BACI Deblocking aminopeptidase OS=Bacillus sp. GeD10 GN=EBGED10_17060 PE=4 SV=1	N1LPW3		Deblocking aminopeptidase	>tr|N1LPW3|N1LPW3_9BACI Deblocking aminopeptidase OS=Bacillus sp. GeD10	EBGED10_17060
	N1LDI7		#N/A	DUF124 domain-containing protein	EBGED10_2380	#N/A		0.774496	1.59119	0.0256335		+	0.425314	-0.184979	0.102748	0.0393849	0.472085	0.501038	0.722769	1.47695	1.62984	0.396434	0.17091	0.945407	0.774496	+	0	237.19	3159900000	142	16	16	16	260	260	27.899	64.6	1.59119	-0.774496	-2.73533	N1LDI7	N1LDI7	>tr|N1LDI7|N1LDI7_9BACI DUF124 domain-containing protein OS=Bacillus sp. GeD10 GN=EBGED10_2380 PE=4 SV=1	N1LDI7		DUF124 domain-containing protein	>tr|N1LDI7|N1LDI7_9BACI DUF124 domain-containing protein OS=Bacillus sp. GeD10	EBGED10_2380
	N1LPA6		bged01016	UDP-N-acetylglucosamine 1-carboxyvinyltransferase	murA	K00790		0.772515	2.94257	0.00114138		+	0.824794	0.852525	1.16333	1.01087	1.28076	1.33515	1.77286	1.79992	2.04812	2.03879	1.02645	1.79897	0.772515	+	0	323.31	2798700000	175	17	17	17	429	429	45.809	62.5	2.94257	-0.772515	-4.93559	N1LPA6	N1LPA6	>tr|N1LPA6|N1LPA6_9BACI UDP-N-acetylglucosamine 1-carboxyvinyltransferase OS=Bacillus sp. GeD10 GN=murA PE=3 SV=1	N1LPA6		UDP-N-acetylglucosamine 1-carboxyvinyltransferase	>tr|N1LPA6|N1LPA6_9BACI UDP-N-acetylglucosamine 1-carboxyvinyltransferase OS=Bacillus sp. GeD10	murA
	N1LU12		bged00135	Pyruvate kinase	EBGED10_48590	K00873		0.770868	2.22311	0.00598257		+	6.85541	6.80362	6.91753	6.53409	7.11702	7.11043	7.35471	7.54394	7.98912	8.08382	6.84553	7.6164	0.770868	+	0	323.31	161320000000	2404	47	47	47	585	585	62.17	85	2.22311	-0.770867	-3.70694	N1LU12	N1LU12	>tr|N1LU12|N1LU12_9BACI Pyruvate kinase OS=Bacillus sp. GeD10 GN=EBGED10_48590 PE=3 SV=1	N1LU12		Pyruvate kinase	>tr|N1LU12|N1LU12_9BACI Pyruvate kinase OS=Bacillus sp. GeD10	EBGED10_48590
	N1LU00		bged03198	UPF0173 metal-dependent hydrolase EBGED10	EBGED10_48440	K03476		0.769936	2.73412	0.00184449		+	0.893806	0.832969	0.390032	1.17376	0.695927	1.52225	1.65492	1.41609	1.30308	1.93983	0.797299	1.56724	0.769936	+	0	258.44	3632100000	129	12	12	12	227	227	24.889	79.3	2.73412	-0.769936	-4.56223	N1LU00	N1LU00	>tr|N1LU00|N1LU00_9BACI UPF0173 metal-dependent hydrolase EBGED10_48440 OS=Bacillus sp. GeD10 GN=EBGED10_48440 PE=3 SV=1	N1LU00		UPF0173 metal-dependent hydrolase EBGED10	>tr|N1LU00|N1LU00_9BACI UPF0173 metal-dependent hydrolase EBGED10_48440 OS=Bacillus sp. GeD10	EBGED10_48440
	N1LUT4		bged00190	Phosphate starvation-inducible protein PhoH,predicted ATPase	EBGED10_51290	K06217		0.769244	2.85563	0.00139435		+	1.46061	1.06152	1.00198	1.31666	1.31251	1.68546	1.73809	2.25663	2.36723	1.95211	1.23066	1.9999	0.769244	+	0	315.04	4131400000	266	18	18	18	319	319	35.359	69.9	2.85563	-0.769244	-4.77794	N1LUT4	N1LUT4	>tr|N1LUT4|N1LUT4_9BACI Phosphate starvation-inducible protein PhoH,predicted ATPase OS=Bacillus sp. GeD10 GN=EBGED10_51290 PE=4 SV=1	N1LUT4		Phosphate starvation-inducible protein PhoH,predicted ATPase	>tr|N1LUT4|N1LUT4_9BACI Phosphate starvation-inducible protein PhoH,predicted ATPase OS=Bacillus sp. GeD10	EBGED10_51290
	N1LYS4		bged00490	DNA polymerase X family	EBGED10_49030	K02347		0.768509	2.56877	0.00269914		+	2.46566	2.55583	2.70193	2.58684	2.93975	3.94164	3.15536	3.35185	3.05144	3.59228	2.65	3.41851	0.768509	+	0	323.31	7873700000	228	23	23	23	573	573	64.69	53.4	2.56877	-0.76851	-4.27681	N1LYS4	N1LYS4	>tr|N1LYS4|N1LYS4_9BACI DNA polymerase X family OS=Bacillus sp. GeD10 GN=EBGED10_49030 PE=4 SV=1	N1LYS4		DNA polymerase X family	>tr|N1LYS4|N1LYS4_9BACI DNA polymerase X family OS=Bacillus sp. GeD10	EBGED10_49030
	N1LJY9		bged01688	2-hydroxychromene-2-carboxylate isomerase/DsbA-like thioredoxin domain	EBGED10_15770	K01829		0.767703	2.46126	0.00345733		+	-1.79611	-0.822914	-1.20734	-1.48372	-1.19251	-0.596063	-0.788308	-0.275158	-0.365426	-0.639138	-1.30052	-0.532819	0.767703	+	0	247.79	1362900000	62	12	12	12	243	243	27.14	68.3	2.46126	-0.767703	-4.09589	N1LJY9	N1LJY9	>tr|N1LJY9|N1LJY9_9BACI 2-hydroxychromene-2-carboxylate isomerase/DsbA-like thioredoxin domain OS=Bacillus sp. GeD10 GN=EBGED10_15770 PE=4 SV=1	N1LJY9		2-hydroxychromene-2-carboxylate isomerase/DsbA-like thioredoxin domain	>tr|N1LJY9|N1LJY9_9BACI 2-hydroxychromene-2-carboxylate isomerase/DsbA-like thioredoxin domain OS=Bacillus sp. GeD10	EBGED10_15770
	N1LVM0		#N/A	Response regulator aspartate phosphatase	EBGED10_40270	K06361		0.765671	1.74066	0.0181695		+	-0.858455	NaN	-1.04287	-0.896168	-0.0894875	-0.457031	0.285648	0.194441	0.298516	-0.101947	-0.721745	0.0439253	0.765671	+	0	70.678	960690000	40	5	5	5	362	362	42.94	20.4	1.74066	-0.765671	-3.066	N1LVM0	N1LVM0	>tr|N1LVM0|N1LVM0_9BACI Response regulator aspartate phosphatase OS=Bacillus sp. GeD10 GN=EBGED10_40270 PE=4 SV=1	N1LVM0		Response regulator aspartate phosphatase	>tr|N1LVM0|N1LVM0_9BACI Response regulator aspartate phosphatase OS=Bacillus sp. GeD10	EBGED10_40270
	N1LZM2		bged02365	Tyrosine--tRNA ligase	tyrS	K01866		0.762332	3.07011	0.00085093		+	3.29048	3.0149	3.38293	3.36302	3.16134	3.50105	4.2346	4.16712	4.07432	4.04724	3.24253	4.00487	0.762332	+	0	323.31	15263000000	541	19	19	19	418	418	46.987	63.2	3.07011	-0.762333	-5.17211	N1LZM2	N1LZM2	>tr|N1LZM2|N1LZM2_9BACI Tyrosine--tRNA ligase OS=Bacillus sp. GeD10 GN=tyrS PE=3 SV=1	N1LZM2		Tyrosine--tRNA ligase	>tr|N1LZM2|N1LZM2_9BACI Tyrosine--tRNA ligase OS=Bacillus sp. GeD10	tyrS
	N1LW66		bged00506	GTP-binding protein TypA/BipA	EBGED10_55590	K06207		0.760369	2.31712	0.0048182		+	5.30213	5.28808	5.00938	5.20008	5.50437	5.41153	6.0559	5.98771	6.11455	6.53619	5.26081	6.02118	0.760369	+	0	323.31	48073000000	1127	35	35	35	614	614	68.991	69.2	2.31712	-0.760369	-3.85864	N1LW66	N1LW66	>tr|N1LW66|N1LW66_9BACI GTP-binding protein TypA/BipA OS=Bacillus sp. GeD10 GN=EBGED10_55590 PE=4 SV=1	N1LW66		GTP-binding protein TypA/BipA	>tr|N1LW66|N1LW66_9BACI GTP-binding protein TypA/BipA OS=Bacillus sp. GeD10	EBGED10_55590
	N1M0Y4		bged00462	Translation initiation factor IF-2	infB	K02519		0.756343	3.53114	0.000294348		+	5.5063	5.47548	5.32468	5.72469	5.63842	6.03881	6.13938	6.23625	6.41666	6.62018	5.53391	6.29026	0.756343	+	0	323.31	56605000000	1536	51	51	51	686	686	75.751	61.8	3.53114	-0.756343	-6.08485	N1M0Y4	N1M0Y4	>tr|N1M0Y4|N1M0Y4_9BACI Translation initiation factor IF-2 OS=Bacillus sp. GeD10 GN=infB PE=3 SV=1	N1M0Y4		Translation initiation factor IF-2	>tr|N1M0Y4|N1M0Y4_9BACI Translation initiation factor IF-2 OS=Bacillus sp. GeD10	infB
	N1LTJ6		bged02094	NADH dehydrogenase	EBGED10_29880	K03885		0.748364	1.53883	0.0289179		+	1.77471	1.27447	1.74168	1.94185	1.98754	1.88854	1.97518	3.11989	2.98255	2.49591	1.74405	2.49241	0.748364	+	0	63.187	4296400000	128	11	11	11	403	403	44.377	42.7	1.53883	-0.748364	-2.65749	N1LTJ6	N1LTJ6	>tr|N1LTJ6|N1LTJ6_9BACI NADH dehydrogenase OS=Bacillus sp. GeD10 GN=EBGED10_29880 PE=4 SV=1	N1LTJ6		NADH dehydrogenase	>tr|N1LTJ6|N1LTJ6_9BACI NADH dehydrogenase OS=Bacillus sp. GeD10	EBGED10_29880
	N1LW73		bged00578	Peptidase, M16 family	EBGED10_57110	K01422		0.740227	1.69963	0.0199695		+	2.71515	2.62056	2.77396	2.65957	2.69872	2.53116	3.83563	3.96304	3.28701	3.55226	2.69359	3.43382	0.740227	+	0	323.31	13411000000	326	21	21	21	413	413	46.949	68.8	1.69963	-0.740227	-2.89745	N1LW73	N1LW73	>tr|N1LW73|N1LW73_9BACI Peptidase, M16 family OS=Bacillus sp. GeD10 GN=EBGED10_57110 PE=3 SV=1	N1LW73		Peptidase, M16 family	>tr|N1LW73|N1LW73_9BACI Peptidase, M16 family OS=Bacillus sp. GeD10	EBGED10_57110
	N1LWM4		#N/A	Putative competence-damage inducible protein	cinA	K03742		0.738729	1.61301	0.0243777		+	0.212992	0.211963	0.4089	0.62208	0.487972	0.175323	1.2455	1.67785	1.40001	1.13887	0.388781	1.12751	0.738729	+	0	244.97	2561700000	181	13	13	13	412	412	45.535	44.7	1.61301	-0.738729	-2.76784	N1LWM4	N1LWM4	>tr|N1LWM4|N1LWM4_9BACI Putative competence-damage inducible protein OS=Bacillus sp. GeD10 GN=cinA PE=3 SV=1	N1LWM4		Putative competence-damage inducible protein	>tr|N1LWM4|N1LWM4_9BACI Putative competence-damage inducible protein OS=Bacillus sp. GeD10	cinA
	N1M0E5		bged01432	Zinc protease	EBGED10_57270	K01422		0.736529	3.3681	0.000428447		+	0.899022	1.25432	1.0969	1.31519	1.37214	1.67208	1.73593	1.98854	2.17576	2.04791	1.18751	1.92404	0.736529	+	0	323.31	4399800000	189	23	23	23	424	424	48.945	69.6	3.3681	-0.736529	-5.75112	N1M0E5	N1M0E5	>tr|N1M0E5|N1M0E5_9BACI Zinc protease OS=Bacillus sp. GeD10 GN=EBGED10_57270 PE=3 SV=1	N1M0E5		Zinc protease	>tr|N1M0E5|N1M0E5_9BACI Zinc protease OS=Bacillus sp. GeD10	EBGED10_57270
	N1LH96		bged02938	Non-phosphorylating glyceraldehyde-3-phosphate dehydrogenase (NADP)	EBGED10_6350	K00131		0.73501	1.58649	0.0259125		+	4.07531	4.00045	4.18329	4.06297	4.02581	3.73854	5.01941	5.0634	5.15896	5.04258	4.06957	4.80458	0.73501	+	0	323.31	29183000000	562	30	30	30	479	479	51.815	73.5	1.58649	-0.73501	-2.72833	N1LH96	N1LH96	>tr|N1LH96|N1LH96_9BACI Non-phosphorylating glyceraldehyde-3-phosphate dehydrogenase (NADP) OS=Bacillus sp. GeD10 GN=EBGED10_6350 PE=3 SV=1	N1LH96		Non-phosphorylating glyceraldehyde-3-phosphate dehydrogenase (NADP)	>tr|N1LH96|N1LH96_9BACI Non-phosphorylating glyceraldehyde-3-phosphate dehydrogenase (NADP) OS=Bacillus sp. GeD10	EBGED10_6350
	N1LYQ7		#N/A	Peptidase, M42 family	EBGED10_48880	K01269		0.734873	2.34095	0.00456093		+	2.56435	2.7441	2.46642	3.03341	2.39147	3.45282	2.83182	3.55544	3.70912	3.32492	2.63995	3.37482	0.734873	+	0	323.31	13059000000	460	NaN	21	21	NaN	361	39.51	59.6	2.34095	-0.734873	-3.89746	N1LYQ7;REV__N1LYQ7	N1LYQ7	>tr|N1LYQ7|N1LYQ7_9BACI Peptidase, M42 family OS=Bacillus sp. GeD10 GN=EBGED10_48880 PE=4 SV=1	N1LYQ7		Peptidase, M42 family	>tr|N1LYQ7|N1LYQ7_9BACI Peptidase, M42 family OS=Bacillus sp. GeD10	EBGED10_48880
N1LZ70	N1LZ70		#N/A	Uncharacterized protein	EBGED10_50530	K02204		0.73281	2.0353	0.00921942		+	NaN	-0.72209	-0.75926	-0.529483	-0.516065	NaN	-0.277872	0.595988	0.107724	-0.0214963	-0.631724	0.101086	0.73281	+	0	153.69	871840000	29	8	8	8	323	323	37.649	37.2	2.0353	-0.73281	-3.77638	N1LZ70	N1LZ70	>tr|N1LZ70|N1LZ70_9BACI Uncharacterized protein OS=Bacillus sp. GeD10 GN=EBGED10_50530 PE=4 SV=1	N1LZ70		Uncharacterized protein	>tr|N1LZ70|N1LZ70_9BACI Uncharacterized protein OS=Bacillus sp. GeD10	EBGED10_50530
	N1LLX0		bged03100	Oxidoreductase of aldo/keto reductase family,subgroup 1	EBGED10_24600	K00100		0.732158	1.9739	0.0106195		+	-1.40673	-0.991514	-0.89827	-0.670937	-0.394314	-0.516105	-0.448861	0.0997568	0.163064	0.00117337	-0.872352	-0.140194	0.732158	+	0	251.97	1629700000	77	12	12	12	275	275	31.694	49.8	1.9739	-0.732158	-3.31496	N1LLX0	N1LLX0	>tr|N1LLX0|N1LLX0_9BACI Oxidoreductase of aldo/keto reductase family,subgroup 1 OS=Bacillus sp. GeD10 GN=EBGED10_24600 PE=4 SV=1	N1LLX0		Oxidoreductase of aldo/keto reductase family,subgroup 1	>tr|N1LLX0|N1LLX0_9BACI Oxidoreductase of aldo/keto reductase family,subgroup 1 OS=Bacillus sp. GeD10	EBGED10_24600
	N1LHE6		bged00417	Transcription termination factor Rho	rho	K03628		0.731853	3.81799	0.000152057		+	1.88076	1.84097	2.14756	2.22682	2.02628	2.56741	2.77948	3.04487	2.71611	2.67379	2.02448	2.75633	0.731853	+	0	323.31	8222600000	394	28	28	28	423	423	48.083	65.5	3.81799	-0.731853	-6.70413	N1LHE6	N1LHE6	>tr|N1LHE6|N1LHE6_9BACI Transcription termination factor Rho OS=Bacillus sp. GeD10 GN=rho PE=3 SV=1	N1LHE6		Transcription termination factor Rho	>tr|N1LHE6|N1LHE6_9BACI Transcription termination factor Rho OS=Bacillus sp. GeD10	rho
	N1LV97		bged01853	Glutamate dehydrogenase	EBGED10_38870	K00260		0.725335	2.15371	0.00701931		+	3.51535	3.80728	4.06999	4.22894	3.95117	4.02789	4.78421	4.61505	4.863	4.90926	3.91455	4.63988	0.725335	+	0	323.31	23608000000	611	23	23	23	428	428	47.492	61.2	2.15371	-0.725336	-3.59636	N1LV97	N1LV97	>tr|N1LV97|N1LV97_9BACI Glutamate dehydrogenase OS=Bacillus sp. GeD10 GN=EBGED10_38870 PE=3 SV=1	N1LV97		Glutamate dehydrogenase	>tr|N1LV97|N1LV97_9BACI Glutamate dehydrogenase OS=Bacillus sp. GeD10	EBGED10_38870
	N1LYJ8		bged03285	Proline dipeptidase	EBGED10_48430	K01271		0.722392	1.81679	0.0152479		+	3.75924	4.05176	3.86246	3.87213	3.73328	3.67502	4.77412	4.86666	4.69732	4.87773	3.85578	4.57817	0.722392	+	0	323.31	28712000000	818	27	27	27	365	365	40.739	86.6	1.81679	-0.722392	-3.07431	N1LYJ8	N1LYJ8	>tr|N1LYJ8|N1LYJ8_9BACI Proline dipeptidase OS=Bacillus sp. GeD10 GN=EBGED10_48430 PE=4 SV=1	N1LYJ8		Proline dipeptidase	>tr|N1LYJ8|N1LYJ8_9BACI Proline dipeptidase OS=Bacillus sp. GeD10	EBGED10_48430
	N1LUT1		bged00509	GTPase Era	era	K03595		0.717585	2.06932	0.00852463		+	2.57064	2.707	2.70773	3.12463	3.21086	4.11142	3.22376	3.29531	3.77669	3.50161	2.86417	3.58176	0.717585	+	0	323.31	11385000000	482	24	24	24	301	301	34.348	71.4	2.06932	-0.717585	-3.46343	N1LUT1	N1LUT1	>tr|N1LUT1|N1LUT1_9BACI GTPase Era OS=Bacillus sp. GeD10 GN=era PE=3 SV=1	N1LUT1		GTPase Era	>tr|N1LUT1|N1LUT1_9BACI GTPase Era OS=Bacillus sp. GeD10	era
	N1LM39		bged00526	Aconitate hydratase	EBGED10_7390	K01681		0.715957	1.70338	0.019798		+	7.27382	7.41557	7.1981	7.2397	7.26728	7.12832	8.49338	7.86294	8.09029	8.39932	7.27889	7.99485	0.715957	+	0	323.31	177730000000	2528	59	59	59	907	907	98.981	74.6	1.70338	-0.715957	-2.90308	N1LM39	N1LM39	>tr|N1LM39|N1LM39_9BACI Aconitate hydratase OS=Bacillus sp. GeD10 GN=EBGED10_7390 PE=3 SV=1	N1LM39		Aconitate hydratase	>tr|N1LM39|N1LM39_9BACI Aconitate hydratase OS=Bacillus sp. GeD10	EBGED10_7390
	N1LXL9		bged00144	Phosphoribosylamine--glycine ligase	purD	K01945		0.714647	3.90244	0.000125188		+	4.97991	4.54986	4.56961	4.62191	4.39707	5.2977	5.4231	5.40158	5.21521	5.354	4.62367	5.33832	0.714647	+	0	323.31	38508000000	747	27	27	27	423	423	45.978	77.3	3.90244	-0.714647	-6.89477	N1LXL9	N1LXL9	>tr|N1LXL9|N1LXL9_9BACI Phosphoribosylamine--glycine ligase OS=Bacillus sp. GeD10 GN=purD PE=3 SV=1	N1LXL9		Phosphoribosylamine--glycine ligase	>tr|N1LXL9|N1LXL9_9BACI Phosphoribosylamine--glycine ligase OS=Bacillus sp. GeD10	purD
	N1LW17		bged00010	Probable dual-specificity RNA methyltransferase RlmN	rlmN	K06941		0.712909	2.80637	0.00156183		+	2.19516	1.9718	1.97575	2.10692	2.46574	2.38495	2.91653	3.02399	3.05944	2.89501	2.14307	2.85598	0.712909	+	0	270.69	6244700000	207	15	15	15	362	362	41.596	48.3	2.80637	-0.71291	-4.68985	N1LW17	N1LW17	>tr|N1LW17|N1LW17_9BACI Probable dual-specificity RNA methyltransferase RlmN OS=Bacillus sp. GeD10 GN=rlmN PE=3 SV=1	N1LW17		Probable dual-specificity RNA methyltransferase RlmN	>tr|N1LW17|N1LW17_9BACI Probable dual-specificity RNA methyltransferase RlmN OS=Bacillus sp. GeD10	rlmN
	N1LRF7		bged00543	Biotin carboxylase of acetyl-CoA carboxylase	EBGED10_25460	K01961		0.696521	2.89982	0.00125944		+	2.7523	2.98577	2.82163	2.97494	3.21695	3.39876	3.40164	4.0001	3.83128	3.60242	2.95032	3.64684	0.696521	+	0	323.31	9813400000	359	19	19	19	450	450	49.854	68.2	2.89982	-0.696521	-4.85772	N1LRF7	N1LRF7	>tr|N1LRF7|N1LRF7_9BACI Biotin carboxylase of acetyl-CoA carboxylase OS=Bacillus sp. GeD10 GN=EBGED10_25460 PE=4 SV=1	N1LRF7		Biotin carboxylase of acetyl-CoA carboxylase	>tr|N1LRF7|N1LRF7_9BACI Biotin carboxylase of acetyl-CoA carboxylase OS=Bacillus sp. GeD10	EBGED10_25460
	N1LRH5		bged00465	Elongation factor G	fusA	K02355		0.690252	1.70696	0.0196354		+	8.83072	8.51006	8.17394	8.42731	8.36862	8.42851	9.24639	8.99518	9.42754	9.66429	8.46213	9.15238	0.690252	+	0	323.31	480440000000	5034	63	63	63	692	692	76.324	84.4	1.70696	-0.690252	-2.90846	N1LRH5	N1LRH5	>tr|N1LRH5|N1LRH5_9BACI Elongation factor G OS=Bacillus sp. GeD10 GN=fusA PE=3 SV=1	N1LRH5		Elongation factor G	>tr|N1LRH5|N1LRH5_9BACI Elongation factor G OS=Bacillus sp. GeD10	fusA
	N1LXK8		bged01335	1-pyrroline-5-carboxylate dehydrogenase	rocA	K00294		0.689368	3.26662	0.000541225		+	7.02247	6.7128	6.7497	7.00566	6.63053	7.37854	7.2771	7.44394	7.78184	7.68659	6.82423	7.5136	0.689368	+	0	323.31	204180000000	3155	56	56	56	515	515	56.224	81	3.26662	-0.689368	-5.5496	N1LXK8	N1LXK8	>tr|N1LXK8|N1LXK8_9BACI 1-pyrroline-5-carboxylate dehydrogenase OS=Bacillus sp. GeD10 GN=rocA PE=3 SV=1	N1LXK8		1-pyrroline-5-carboxylate dehydrogenase	>tr|N1LXK8|N1LXK8_9BACI 1-pyrroline-5-carboxylate dehydrogenase OS=Bacillus sp. GeD10	rocA
	N1LXT6		bged00638	Ketol-acid reductoisomerase	ilvC	K00053		0.673322	1.70985	0.0195054		+	0.896983	0.766455	1.07097	1.6266	1.28168	1.12281	1.94877	2.08692	2.01105	1.83974	1.12854	1.80186	0.673322	+	0	282.98	3454300000	163	16	16	16	336	336	36.648	58.6	1.70985	-0.673322	-2.91279	N1LXT6	N1LXT6	>tr|N1LXT6|N1LXT6_9BACI Ketol-acid reductoisomerase OS=Bacillus sp. GeD10 GN=ilvC PE=3 SV=1	N1LXT6		Ketol-acid reductoisomerase	>tr|N1LXT6|N1LXT6_9BACI Ketol-acid reductoisomerase OS=Bacillus sp. GeD10	ilvC
	N1LKL7		bged00228	DNA polymerase III subunit beta	EBGED10_17870	K02338		0.660119	1.55936	0.027583		+	2.8739	2.04738	2.18745	2.7117	2.42888	3.17712	2.74792	2.61455	3.37637	3.63395	2.44986	3.10998	0.660119	+	0	323.31	9008500000	361	23	23	23	381	381	42.787	76.6	1.55936	-0.660119	-2.68798	N1LKL7	N1LKL7	>tr|N1LKL7|N1LKL7_9BACI DNA polymerase III subunit beta OS=Bacillus sp. GeD10 GN=EBGED10_17870 PE=4 SV=1	N1LKL7		DNA polymerase III subunit beta	>tr|N1LKL7|N1LKL7_9BACI DNA polymerase III subunit beta OS=Bacillus sp. GeD10	EBGED10_17870
	N1LPN1		bged00782	Arginine--tRNA ligase	argS	K01887		0.658318	1.747	0.0179059		+	1.51986	1.34572	1.369	1.30348	1.87195	1.37195	2.31217	2.20317	2.3914	2.42289	1.482	2.14032	0.658318	+	0	294.49	4164100000	164	27	27	27	562	562	64.587	53.4	1.747	-0.658317	-2.96873	N1LPN1	N1LPN1	>tr|N1LPN1|N1LPN1_9BACI Arginine--tRNA ligase OS=Bacillus sp. GeD10 GN=argS PE=3 SV=1	N1LPN1		Arginine--tRNA ligase	>tr|N1LPN1|N1LPN1_9BACI Arginine--tRNA ligase OS=Bacillus sp. GeD10	argS
	N1LYF3		bged02295	Aspartyl-tRNA synthetase	EBGED10_50020	K01876		0.652863	3.06905	0.000853003		+	4.05967	3.99401	4.11315	3.9547	4.26909	4.35489	4.69019	4.96503	4.67414	4.97068	4.07812	4.73099	0.652863	+	0	323.31	21552000000	917	38	38	38	591	591	66.307	72.8	3.06905	-0.652863	-5.17013	N1LYF3	N1LYF3	>tr|N1LYF3|N1LYF3_9BACI Aspartyl-tRNA synthetase OS=Bacillus sp. GeD10 GN=EBGED10_50020 PE=3 SV=1	N1LYF3		Aspartyl-tRNA synthetase	>tr|N1LYF3|N1LYF3_9BACI Aspartyl-tRNA synthetase OS=Bacillus sp. GeD10	EBGED10_50020
	N1LMT0		bged00619	Probable glycine dehydrogenase (decarboxylating) subunit 1	gcvPA	K00282		0.65122	3.07133	0.000848542		+	5.47301	5.56951	5.3967	5.98559	5.39515	6.04441	6.15933	6.28689	6.18138	6.40404	5.56399	6.21521	0.65122	+	0	323.31	76930000000	1067	27	27	27	447	447	49.398	71.1	3.07133	-0.65122	-5.17441	N1LMT0	N1LMT0	>tr|N1LMT0|N1LMT0_9BACI Probable glycine dehydrogenase (decarboxylating) subunit 1 OS=Bacillus sp. GeD10 GN=gcvPA PE=3 SV=1	N1LMT0		Probable glycine dehydrogenase (decarboxylating) subunit 1	>tr|N1LMT0|N1LMT0_9BACI Probable glycine dehydrogenase (decarboxylating) subunit 1 OS=Bacillus sp. GeD10	gcvPA
	N1LSQ1		bged00519	NADPH dehydrogenase	namA	K00354		0.629533	1.50765	0.0310705		+	-0.605384	0.366641	0.00704163	0.398197	0.238093	0.497767	0.350928	0.772509	0.673542	1.2575	0.0809175	0.71045	0.629533	+	0	323.31	1694500000	91	15	15	15	345	345	38.493	70.1	1.50765	-0.629533	-2.61124	N1LSQ1	N1LSQ1	>tr|N1LSQ1|N1LSQ1_9BACI NADPH dehydrogenase OS=Bacillus sp. GeD10 GN=namA PE=3 SV=1	N1LSQ1		NADPH dehydrogenase	>tr|N1LSQ1|N1LSQ1_9BACI NADPH dehydrogenase OS=Bacillus sp. GeD10	namA
	N1LNW5		bged00594	Ferredoxin--NADP reductase	EBGED10_29890	K00384		0.625696	1.97688	0.0105467		+	2.36395	2.80874	2.82163	2.90275	2.92015	3.07544	2.97669	3.43581	3.72803	3.72973	2.76344	3.38914	0.625696	+	0	323.31	11341000000	337	19	19	19	329	329	36.493	79.6	1.97688	-0.625696	-3.31958	N1LNW5	N1LNW5	>tr|N1LNW5|N1LNW5_9BACI Ferredoxin--NADP reductase OS=Bacillus sp. GeD10 GN=EBGED10_29890 PE=3 SV=1	N1LNW5		Ferredoxin--NADP reductase	>tr|N1LNW5|N1LNW5_9BACI Ferredoxin--NADP reductase OS=Bacillus sp. GeD10	EBGED10_29890
	N1LTD9		bged00165	Alkyl hydroperoxide reductase protein F	EBGED10_46860	K03387		0.622012	1.60879	0.0246156		+	5.04666	4.47078	4.65567	4.48054	4.48329	4.55473	5.57558	5.6743	5.22936	5.21303	4.62739	5.2494	0.622012	+	0	323.31	42295000000	1084	29	29	29	508	508	54.808	77.2	1.60879	-0.622011	-2.76155	N1LTD9	N1LTD9	>tr|N1LTD9|N1LTD9_9BACI Alkyl hydroperoxide reductase protein F OS=Bacillus sp. GeD10 GN=EBGED10_46860 PE=3 SV=1	N1LTD9		Alkyl hydroperoxide reductase protein F	>tr|N1LTD9|N1LTD9_9BACI Alkyl hydroperoxide reductase protein F OS=Bacillus sp. GeD10	EBGED10_46860
	N1LQ83		bged02009	Xaa-Pro aminopeptidase	EBGED10_18100	K01262		0.618036	1.90488	0.0124487		+	4.02097	4.01412	3.81979	4.091	3.78171	4.60459	4.01615	4.32221	4.8177	5.05713	3.94552	4.56355	0.618036	+	0	323.31	26091000000	760	35	35	35	427	427	48.453	81.5	1.90488	-0.618036	-3.20869	N1LQ83	N1LQ83	>tr|N1LQ83|N1LQ83_9BACI Xaa-Pro aminopeptidase OS=Bacillus sp. GeD10 GN=EBGED10_18100 PE=4 SV=1	N1LQ83		Xaa-Pro aminopeptidase	>tr|N1LQ83|N1LQ83_9BACI Xaa-Pro aminopeptidase OS=Bacillus sp. GeD10	EBGED10_18100
	N1LK31		bged01330	Arginase	EBGED10_3000	K01476		0.610215	1.74533	0.0179752		+	1.62802	1.18966	1.45145	1.69642	1.83361	2.04934	1.65774	2.02958	2.59864	2.51494	1.55983	2.17005	0.610215	+	0	323.31	7035000000	239	17	17	17	297	297	32.296	63	1.74533	-0.610216	-2.9662	N1LK31	N1LK31	>tr|N1LK31|N1LK31_9BACI Arginase OS=Bacillus sp. GeD10 GN=EBGED10_3000 PE=3 SV=1	N1LK31		Arginase	>tr|N1LK31|N1LK31_9BACI Arginase OS=Bacillus sp. GeD10	EBGED10_3000
	N1LSP0		bged00126	D-Ribose 1,5-phosphomutase	EBGED10_29820	K01835		0.610101	1.55807	0.0276652		+	5.88199	5.71441	5.64327	5.54271	5.68184	5.49472	6.42116	6.32985	6.43116	6.83782	5.69284	6.30294	0.610101	+	0	323.31	58902000000	1022	45	45	45	574	574	64.155	81.5	1.55807	-0.610101	-2.68605	N1LSP0	N1LSP0	>tr|N1LSP0|N1LSP0_9BACI D-Ribose 1,5-phosphomutase OS=Bacillus sp. GeD10 GN=EBGED10_29820 PE=3 SV=1	N1LSP0		D-Ribose 1,5-phosphomutase	>tr|N1LSP0|N1LSP0_9BACI D-Ribose 1,5-phosphomutase OS=Bacillus sp. GeD10	EBGED10_29820
	N1LJV2		bged02250	Adenylosuccinate synthetase	purA	K01939		0.602777	1.56909	0.0269715		+	5.50176	5.05714	5.04255	5.36277	4.98425	5.40333	5.35778	5.69789	6.1646	6.33876	5.18969	5.79247	0.602777	+	0	323.31	66622000000	1338	32	32	32	429	429	47.568	75.3	1.56909	-0.602777	-2.70245	N1LJV2	N1LJV2	>tr|N1LJV2|N1LJV2_9BACI Adenylosuccinate synthetase OS=Bacillus sp. GeD10 GN=purA PE=3 SV=1	N1LJV2		Adenylosuccinate synthetase	>tr|N1LJV2|N1LJV2_9BACI Adenylosuccinate synthetase OS=Bacillus sp. GeD10	purA
	N1LL72		bged02593	Cysteine--tRNA ligase	cysS	K01883		0.600715	1.95573	0.0110732		+	1.99052	1.86215	2.05082	2.12389	2.17906	1.98426	2.8081	2.91111	2.59505	2.9115	2.04129	2.642	0.600715	+	0	323.31	7290800000	519	33	33	33	465	465	54.035	77.4	1.95573	-0.600716	-3.2869	N1LL72	N1LL72	>tr|N1LL72|N1LL72_9BACI Cysteine--tRNA ligase OS=Bacillus sp. GeD10 GN=cysS PE=3 SV=1	N1LL72		Cysteine--tRNA ligase	>tr|N1LL72|N1LL72_9BACI Cysteine--tRNA ligase OS=Bacillus sp. GeD10	cysS
	N1LII8		bged00602	Glucokinase	EBGED10_10760	K00845		0.593685	1.7279	0.018711		+	2.11059	2.13601	2.54673	2.31347	2.3786	2.24923	2.70913	3.06474	3.21012	3.22061	2.29708	2.89077	0.593685	+	0	323.31	10279000000	386	20	20	20	327	327	34.401	72.8	1.7279	-0.593685	-2.93995	N1LII8	N1LII8	>tr|N1LII8|N1LII8_9BACI Glucokinase OS=Bacillus sp. GeD10 GN=EBGED10_10760 PE=4 SV=1	N1LII8		Glucokinase	>tr|N1LII8|N1LII8_9BACI Glucokinase OS=Bacillus sp. GeD10	EBGED10_10760
	N1LWQ0		#N/A	Bacillus cereus group-specific protein,uncharacterized	EBGED10_43970	#N/A		0.592832	1.66453	0.0216506		+	NaN	-1.12991	-0.99936	-1.32257	-1.0461	-1.1608	-0.541575	-0.158871	-0.408782	-0.388252	-1.12449	-0.531655	0.592832	+	0	81.877	457640000	45	6	6	6	450	450	52.17	14.7	1.66453	-0.592832	-2.94203	N1LWQ0	N1LWQ0	>tr|N1LWQ0|N1LWQ0_9BACI Bacillus cereus group-specific protein,uncharacterized OS=Bacillus sp. GeD10 GN=EBGED10_43970 PE=4 SV=1	N1LWQ0		Bacillus cereus group-specific protein,uncharacterized	>tr|N1LWQ0|N1LWQ0_9BACI Bacillus cereus group-specific protein,uncharacterized OS=Bacillus sp. GeD10	EBGED10_43970
	N1LJL7		bged00995	3-oxoacyl-[acyl-carrier-protein] synthase 3	fabH	K00648		0.592684	1.79398	0.0160703		+	0.114559	0.21691	0.290596	0.42626	0.87655	0.555126	0.871474	0.870782	1.25366	1.33725	0.384975	0.977659	0.592684	+	0	323.31	2179200000	143	25	25	25	310	310	33.423	78.4	1.79398	-0.592684	-3.03971	N1LJL7	N1LJL7	>tr|N1LJL7|N1LJL7_9BACI 3-oxoacyl-[acyl-carrier-protein] synthase 3 OS=Bacillus sp. GeD10 GN=fabH PE=3 SV=1	N1LJL7		3-oxoacyl-[acyl-carrier-protein] synthase 3	>tr|N1LJL7|N1LJL7_9BACI 3-oxoacyl-[acyl-carrier-protein] synthase 3 OS=Bacillus sp. GeD10	fabH
	N1LUH9		bged00208	ATP-dependent RNA helicase YfmL	EBGED10_36320	K05592		0.585126	1.80717	0.0155895		+	0.306926	0.263262	0.482268	0.903491	0.769562	0.712387	1.14077	1.10952	1.07427	1.6142	0.545102	1.13023	0.585126	+	0	149.4	2193800000	192	16	16	16	389	389	44.066	53.2	1.80717	-0.585126	-3.05971	N1LUH9	N1LUH9	>tr|N1LUH9|N1LUH9_9BACI ATP-dependent RNA helicase YfmL OS=Bacillus sp. GeD10 GN=EBGED10_36320 PE=4 SV=1	N1LUH9		ATP-dependent RNA helicase YfmL	>tr|N1LUH9|N1LUH9_9BACI ATP-dependent RNA helicase YfmL OS=Bacillus sp. GeD10	EBGED10_36320
	N1LSF7		bged00503	GMP synthase [glutamine-hydrolyzing]	guaA	K01951		0.571417	1.59429	0.0254514		+	5.35618	4.82771	4.98652	5.19461	5.18389	4.94511	5.98279	5.77351	5.82184	5.88275	5.10978	5.6812	0.571417	+	0	323.31	52236000000	1206	32	32	32	512	512	57.303	74.2	1.59429	-0.571417	-2.73994	N1LSF7	N1LSF7	>tr|N1LSF7|N1LSF7_9BACI GMP synthase [glutamine-hydrolyzing] OS=Bacillus sp. GeD10 GN=guaA PE=3 SV=1	N1LSF7		GMP synthase [glutamine-hydrolyzing]	>tr|N1LSF7|N1LSF7_9BACI GMP synthase [glutamine-hydrolyzing] OS=Bacillus sp. GeD10	guaA
	N1LUR6		bged00515	Aspartate-semialdehyde dehydrogenase	asd	K00133		0.568721	2.21643	0.00607533		+	3.24756	3.2644	3.34366	3.39568	3.2222	3.56213	3.72898	4.35046	3.6085	4.06703	3.2947	3.86342	0.568721	+	0	323.31	18513000000	633	25	25	25	348	348	37.973	87.1	2.21643	-0.568721	-3.69625	N1LUR6	N1LUR6	>tr|N1LUR6|N1LUR6_9BACI Aspartate-semialdehyde dehydrogenase OS=Bacillus sp. GeD10 GN=asd PE=3 SV=1	N1LUR6		Aspartate-semialdehyde dehydrogenase	>tr|N1LUR6|N1LUR6_9BACI Aspartate-semialdehyde dehydrogenase OS=Bacillus sp. GeD10	asd
	N1LT16		bged00781	Arginine--tRNA ligase	argS	K01887		0.563572	2.08931	0.00814115		+	3.50265	3.30857	3.4717	3.71401	3.88226	3.64814	4.1601	4.25494	4.29112	4.34276	3.57584	4.13941	0.563572	+	0	323.31	17474000000	730	37	37	37	556	556	62.46	79.9	2.08931	-0.563572	-3.49478	N1LT16	N1LT16	>tr|N1LT16|N1LT16_9BACI Arginine--tRNA ligase OS=Bacillus sp. GeD10 GN=argS PE=3 SV=1	N1LT16		Arginine--tRNA ligase	>tr|N1LT16|N1LT16_9BACI Arginine--tRNA ligase OS=Bacillus sp. GeD10	argS
	N1LXN3		bged00703	N5-carboxyaminoimidazole ribonucleotide synthase	purK	K01589		0.56321	1.55737	0.0277098		+	3.02908	3.11988	3.20458	3.58412	3.31009	3.23861	3.63755	3.75209	4.16855	4.267	3.24955	3.81276	0.56321	+	0	323.31	15694000000	427	20	20	20	383	383	42.518	70.2	1.55737	-0.563209	-2.68501	N1LXN3	N1LXN3	>tr|N1LXN3|N1LXN3_9BACI N5-carboxyaminoimidazole ribonucleotide synthase OS=Bacillus sp. GeD10 GN=purK PE=3 SV=1	N1LXN3		N5-carboxyaminoimidazole ribonucleotide synthase	>tr|N1LXN3|N1LXN3_9BACI N5-carboxyaminoimidazole ribonucleotide synthase OS=Bacillus sp. GeD10	purK
	N1LPM2		bged01005	2,3-bisphosphoglycerate-independent phosphoglycerate mutase	gpmI	K15633		0.560712	2.29588	0.00505961		+	5.14969	5.14048	4.80316	5.29763	5.22774	5.42739	5.46795	5.67238	5.76271	6.09184	5.12374	5.68445	0.560712	+	0	323.31	48465000000	1056	29	29	29	509	509	56.162	64.4	2.29588	-0.560712	-3.82418	N1LPM2	N1LPM2	>tr|N1LPM2|N1LPM2_9BACI 2,3-bisphosphoglycerate-independent phosphoglycerate mutase OS=Bacillus sp. GeD10 GN=gpmI PE=3 SV=1	N1LPM2		2,3-bisphosphoglycerate-independent phosphoglycerate mutase	>tr|N1LPM2|N1LPM2_9BACI 2,3-bisphosphoglycerate-independent phosphoglycerate mutase OS=Bacillus sp. GeD10	gpmI
	N1LN64		bged00082	HPr kinase/phosphorylase	hprK	K06023		0.557757	1.65411	0.0221765		+	0.988757	1.633	1.5487	1.5958	2.09236	2.14749	1.87948	2.42461	2.02864	2.16717	1.57172	2.12948	0.557757	+	0	323.31	4325900000	230	17	17	17	309	309	34.6	67	1.65411	-0.557757	-2.82923	N1LN64	N1LN64	>tr|N1LN64|N1LN64_9BACI HPr kinase/phosphorylase OS=Bacillus sp. GeD10 GN=hprK PE=3 SV=1	N1LN64		HPr kinase/phosphorylase	>tr|N1LN64|N1LN64_9BACI HPr kinase/phosphorylase OS=Bacillus sp. GeD10	hprK
	N1LQX9		bged00555	Chorismate synthase	aroC	K01736		0.555271	2.53117	0.00294324		+	0.846093	1.07439	1.14297	1.24107	0.949618	1.54175	1.52315	2.04636	1.49309	1.42616	1.05083	1.6061	0.555271	+	0	315.72	3155900000	132	13	13	13	390	390	42.413	47.7	2.53117	-0.555271	-4.21314	N1LQX9	N1LQX9	>tr|N1LQX9|N1LQX9_9BACI Chorismate synthase OS=Bacillus sp. GeD10 GN=aroC PE=3 SV=1	N1LQX9		Chorismate synthase	>tr|N1LQX9|N1LQX9_9BACI Chorismate synthase OS=Bacillus sp. GeD10	aroC
	N1LRR5		bged01449	Acetylornithine deacetylase/Succinyl-diaminopimelate desuccinylase and related deacylases	EBGED10_41510	K01439		0.553928	2.14831	0.00710708		+	3.2247	3.66472	3.20341	3.58297	3.1393	4.26761	3.60107	3.84009	3.85691	4.01904	3.36302	3.91695	0.553928	+	0	323.31	16738000000	651	33	33	33	468	468	51.27	68.6	2.14831	-0.553928	-3.58781	N1LRR5	N1LRR5	>tr|N1LRR5|N1LRR5_9BACI Acetylornithine deacetylase/Succinyl-diaminopimelate desuccinylase and related deacylases OS=Bacillus sp. GeD10 GN=EBGED10_41510 PE=4 SV=1	N1LRR5		Acetylornithine deacetylase/Succinyl-diaminopimelate desuccinylase and related deacylases	>tr|N1LRR5|N1LRR5_9BACI Acetylornithine deacetylase/Succinyl-diaminopimelate desuccinylase and related deacylases OS=Bacillus sp. GeD10	EBGED10_41510
	N1LKS2		bged02003	Ferredoxin--sulfite reductase, bacillial type	EBGED10_2160	K00366		0.546579	2.79711	0.00159546		+	5.77602	5.80412	5.34133	5.67	5.31877	6.05941	6.00933	6.07862	6.21907	6.2767	5.58205	6.12863	0.546579	+	0	323.31	85073000000	1376	39	39	39	540	540	60.408	85.9	2.79711	-0.546579	-4.6734	N1LKS2	N1LKS2	>tr|N1LKS2|N1LKS2_9BACI Ferredoxin--sulfite reductase, bacillial type OS=Bacillus sp. GeD10 GN=EBGED10_2160 PE=4 SV=1	N1LKS2		Ferredoxin--sulfite reductase, bacillial type	>tr|N1LKS2|N1LKS2_9BACI Ferredoxin--sulfite reductase, bacillial type OS=Bacillus sp. GeD10	EBGED10_2160
	N1LY86		bged00512	Bifunctional purine biosynthesis protein PurH	purH	K00602		0.541858	3.164	0.000685481		+	7.51372	7.4499	7.07789	7.22206	7.16038	8.03938	7.82303	7.7163	7.79866	7.75587	7.28479	7.82665	0.541858	+	0	323.31	223620000000	2117	39	39	39	511	511	55.573	85.3	3.164	-0.541858	-5.35045	N1LY86	N1LY86	>tr|N1LY86|N1LY86_9BACI Bifunctional purine biosynthesis protein PurH OS=Bacillus sp. GeD10 GN=purH PE=3 SV=1	N1LY86		Bifunctional purine biosynthesis protein PurH	>tr|N1LY86|N1LY86_9BACI Bifunctional purine biosynthesis protein PurH OS=Bacillus sp. GeD10	purH
	N1LXC2		bged00468	Elongation factor 4	lepA	K03596		0.534354	2.28237	0.0052195		+	3.35322	3.22959	3.54634	3.45873	3.85318	3.74172	4.10429	4.28695	3.90375	4.07614	3.48821	4.02257	0.534354	+	0	323.31	12981000000	503	31	31	31	607	607	67.917	64.4	2.28237	-0.534354	-3.8023	N1LXC2	N1LXC2	>tr|N1LXC2|N1LXC2_9BACI Elongation factor 4 OS=Bacillus sp. GeD10 GN=lepA PE=3 SV=1	N1LXC2		Elongation factor 4	>tr|N1LXC2|N1LXC2_9BACI Elongation factor 4 OS=Bacillus sp. GeD10	lepA
	N1LUA4		bged02444	Dihydrolipoyl dehydrogenase	EBGED10_55450	K00382		0.524417	2.37134	0.00425262		+	7.83064	8.30778	7.93862	8.0489	8.07161	8.76226	8.37717	8.54703	8.84192	8.29126	8.03951	8.56393	0.524417	+	0	323.31	280430000000	2128	33	33	33	470	470	49.439	66	2.37134	-0.524418	-3.94721	N1LUA4	N1LUA4	>tr|N1LUA4|N1LUA4_9BACI Dihydrolipoyl dehydrogenase OS=Bacillus sp. GeD10 GN=EBGED10_55450 PE=4 SV=1	N1LUA4		Dihydrolipoyl dehydrogenase	>tr|N1LUA4|N1LUA4_9BACI Dihydrolipoyl dehydrogenase OS=Bacillus sp. GeD10	EBGED10_55450
	N1LYK0		bged02453	Aminopeptidase	EBGED10_50670	K01269		0.50561	1.97444	0.0106061		+	4.22214	4.75116	4.26412	4.51942	4.26144	4.67708	4.70721	4.795	5.18539	5.18164	4.40365	4.90926	0.50561	+	0	323.31	37518000000	587	19	19	19	371	371	41.779	70.1	1.97444	-0.50561	-3.3158	N1LYK0	N1LYK0	>tr|N1LYK0|N1LYK0_9BACI Aminopeptidase OS=Bacillus sp. GeD10 GN=EBGED10_50670 PE=4 SV=1	N1LYK0		Aminopeptidase	>tr|N1LYK0|N1LYK0_9BACI Aminopeptidase OS=Bacillus sp. GeD10	EBGED10_50670
	N1LM58		bged02456	Aminopeptidase YpdF (MP-, MA-, MS-, AP-,NP-specific)	EBGED10_25600	K01271		0.479108	2.16719	0.00680476		+	2.78385	2.80383	2.87686	2.98635	2.86391	2.91165	3.59665	3.59097	3.37935	3.23171	2.86296	3.34207	0.479108	+	0	323.31	13083000000	526	21	21	21	353	353	38.626	75.1	2.16719	-0.479108	-3.61775	N1LM58	N1LM58	>tr|N1LM58|N1LM58_9BACI Aminopeptidase YpdF (MP-, MA-, MS-, AP-,NP-specific) OS=Bacillus sp. GeD10 GN=EBGED10_25600 PE=4 SV=1	N1LM58		Aminopeptidase YpdF (MP-, MA-, MS-, AP-,NP-specific)	>tr|N1LM58|N1LM58_9BACI Aminopeptidase YpdF (MP-, MA-, MS-, AP-,NP-specific) OS=Bacillus sp. GeD10	EBGED10_25600
	N1LQQ1		bged03287	Aminoacyl-histidine dipeptidase (Peptidase D)	EBGED10_36690	K01270		0.47866	2.17273	0.00671854		+	3.47525	3.38766	2.88861	3.40435	3.16884	3.63066	3.54594	3.98836	3.72687	3.82618	3.26494	3.7436	0.47866	+	0	323.31	14030000000	497	23	23	23	489	489	54.579	71.6	2.17273	-0.47866	-3.62655	N1LQQ1	N1LQQ1	>tr|N1LQQ1|N1LQQ1_9BACI Aminoacyl-histidine dipeptidase (Peptidase D) OS=Bacillus sp. GeD10 GN=EBGED10_36690 PE=4 SV=1	N1LQQ1		Aminoacyl-histidine dipeptidase (Peptidase D)	>tr|N1LQQ1|N1LQQ1_9BACI Aminoacyl-histidine dipeptidase (Peptidase D) OS=Bacillus sp. GeD10	EBGED10_36690
	N1LIP1		bged00125	Phosphoglucosamine mutase	glmM	K03431		0.470517	1.54093	0.0287785		+	4.20766	4.36134	4.65003	4.56752	4.40921	4.2862	5.01333	5.17465	5.06757	5.0066	4.43915	4.90967	0.470517	+	0	323.31	30801000000	625	28	28	28	448	448	48.432	62.9	1.54093	-0.470517	-2.66061	N1LIP1	N1LIP1	>tr|N1LIP1|N1LIP1_9BACI Phosphoglucosamine mutase OS=Bacillus sp. GeD10 GN=glmM PE=3 SV=1	N1LIP1		Phosphoglucosamine mutase	>tr|N1LIP1|N1LIP1_9BACI Phosphoglucosamine mutase OS=Bacillus sp. GeD10	glmM
	N1LV42		bged00687	Pantothenate synthetase	panC	K01918		0.465711	1.79187	0.0161485		+	1.64154	1.84486	1.8191	2.26275	2.08147	2.04299	2.33886	2.607	2.63985	2.34957	1.92994	2.39565	0.465711	+	0	323.31	6503900000	279	20	20	20	282	282	31.885	90.1	1.79187	-0.465711	-3.03652	N1LV42	N1LV42	>tr|N1LV42|N1LV42_9BACI Pantothenate synthetase OS=Bacillus sp. GeD10 GN=panC PE=3 SV=1	N1LV42		Pantothenate synthetase	>tr|N1LV42|N1LV42_9BACI Pantothenate synthetase OS=Bacillus sp. GeD10	panC
	N1LPJ7		bged00454	SSU ribosomal protein S1p	EBGED10_38800	K02945		0.462374	2.39001	0.0040737		+	5.47565	5.91843	5.49679	5.64484	5.65854	6.27581	5.79659	6.23857	6.13391	6.06126	5.63885	6.10123	0.462374	+	0	323.31	72053000000	1473	33	33	33	382	382	42.154	88	2.39001	-0.462374	-3.97789	N1LPJ7	N1LPJ7	>tr|N1LPJ7|N1LPJ7_9BACI SSU ribosomal protein S1p OS=Bacillus sp. GeD10 GN=EBGED10_38800 PE=4 SV=1	N1LPJ7		SSU ribosomal protein S1p	>tr|N1LPJ7|N1LPJ7_9BACI SSU ribosomal protein S1p OS=Bacillus sp. GeD10	EBGED10_38800
	N1LYQ9		bged02151	Oligopeptide ABC transporter, periplasmic oligopeptide-binding protein OppA (TC 3.A.1.5.1)	EBGED10_51380	K02035		0.459532	1.80701	0.0155953		+	2.08979	2.24504	2.378	2.12617	2.2182	2.2312	2.59602	3.0044	2.56981	2.95345	2.21144	2.67097	0.459532	+	0	323.31	5992900000	287	30	30	30	575	575	63.992	75.1	1.80701	-0.459532	-3.05946	N1LYQ9	N1LYQ9	>tr|N1LYQ9|N1LYQ9_9BACI Oligopeptide ABC transporter, periplasmic oligopeptide-binding protein OppA (TC 3.A.1.5.1) OS=Bacillus sp. GeD10 GN=EBGED10_51380 PE=4 SV=1	N1LYQ9		Oligopeptide ABC transporter, periplasmic oligopeptide-binding protein OppA (TC 3.A.1.5.1)	>tr|N1LYQ9|N1LYQ9_9BACI Oligopeptide ABC transporter, periplasmic oligopeptide-binding protein OppA (TC 3.A.1.5.1) OS=Bacillus sp. GeD10	EBGED10_51380
	N1LTG9		bged01348	Enoyl-[acyl-carrier-protein] reductase [NADH]	EBGED10_29530	K00208		0.455209	2.03247	0.00927966		+	4.84341	4.98787	4.59591	4.86802	4.83234	5.17309	5.19468	5.00389	5.32927	5.70267	4.82551	5.28072	0.455209	+	0	323.31	48575000000	964	22	22	22	256	256	27.726	89.8	2.03247	-0.455209	-3.40587	N1LTG9	N1LTG9	>tr|N1LTG9|N1LTG9_9BACI Enoyl-[acyl-carrier-protein] reductase [NADH] OS=Bacillus sp. GeD10 GN=EBGED10_29530 PE=3 SV=1	N1LTG9		Enoyl-[acyl-carrier-protein] reductase [NADH]	>tr|N1LTG9|N1LTG9_9BACI Enoyl-[acyl-carrier-protein] reductase [NADH] OS=Bacillus sp. GeD10	EBGED10_29530
	N1LHF9		bged00101	Inosine-5-monophosphate dehydrogenase	guaB	K00088		0.448398	2.00889	0.00979743		+	5.36213	5.42388	5.59919	5.62996	5.44135	5.5275	5.83621	6.01884	6.25148	6.06447	5.4913	5.9397	0.448398	+	0	323.31	62543000000	1366	41	41	41	487	487	52.513	86.2	2.00889	-0.448398	-3.36918	N1LHF9	N1LHF9	>tr|N1LHF9|N1LHF9_9BACI Inosine-5-monophosphate dehydrogenase OS=Bacillus sp. GeD10 GN=guaB PE=3 SV=1	N1LHF9		Inosine-5-monophosphate dehydrogenase	>tr|N1LHF9|N1LHF9_9BACI Inosine-5-monophosphate dehydrogenase OS=Bacillus sp. GeD10	guaB
	N1LQ57		bged00416	DEAD-box ATP-dependent RNA helicase CshA	cshA	K05592		0.434333	1.9574	0.0110306		+	5.66814	5.2072	5.48677	5.42084	5.58638	5.56497	5.94447	6.03516	5.80748	6.18891	5.47386	5.9082	0.434333	+	0	323.31	60151000000	1183	34	34	34	533	533	59.471	60.6	1.9574	-0.434334	-3.28948	N1LQ57	N1LQ57	>tr|N1LQ57|N1LQ57_9BACI DEAD-box ATP-dependent RNA helicase CshA OS=Bacillus sp. GeD10 GN=cshA PE=3 SV=1	N1LQ57		DEAD-box ATP-dependent RNA helicase CshA	>tr|N1LQ57|N1LQ57_9BACI DEAD-box ATP-dependent RNA helicase CshA OS=Bacillus sp. GeD10	cshA
	N1LTW9		bged00516	NAD kinase	nadK	K00858		0.420744	1.59236	0.0255647		+	3.5512	3.88215	3.24087	4.09188	3.81255	4.19455	4.09635	4.19594	4.22016	3.97536	3.71573	4.13647	0.420744	+	0	323.31	22856000000	616	19	19	19	267	267	30.317	83.5	1.59236	-0.420744	-2.73707	N1LTW9	N1LTW9	>tr|N1LTW9|N1LTW9_9BACI NAD kinase OS=Bacillus sp. GeD10 GN=nadK PE=3 SV=1	N1LTW9		NAD kinase	>tr|N1LTW9|N1LTW9_9BACI NAD kinase OS=Bacillus sp. GeD10	nadK
	N1LUU8		bged02159	Oligopeptide ABC transporter, periplasmic oligopeptide-binding protein OppA (TC 3.A.1.5.1)	EBGED10_57500	K15580		0.413517	1.61638	0.0241892		+	5.69499	5.41205	5.30614	5.56105	5.3661	5.76541	5.47725	5.95836	5.92515	6.28174	5.46807	5.88158	0.413517	+	0	323.31	58064000000	1169	NaN	46	49	NaN	567	63.755	59.3	1.61638	-0.413516	-2.77287	N1LUU8;N1M0H4	N1LUU8	>tr|N1LUU8|N1LUU8_9BACI Oligopeptide ABC transporter, periplasmic oligopeptide-binding protein OppA (TC 3.A.1.5.1) OS=Bacillus sp. GeD10 GN=EBGED10_57500 PE=4 SV=1	N1LUU8		Oligopeptide ABC transporter, periplasmic oligopeptide-binding protein OppA (TC 3.A.1.5.1)	>tr|N1LUU8|N1LUU8_9BACI Oligopeptide ABC transporter, periplasmic oligopeptide-binding protein OppA (TC 3.A.1.5.1) OS=Bacillus sp. GeD10	EBGED10_57500
	N1LRR4		bged00207	ATP-dependent RNA helicase BA2475	EBGED10_26610	K05592		0.402859	2.44515	0.00358797		+	-0.0771351	0.0295678	-0.0298021	0.0328328	-0.030881	0.747485	0.258256	0.386055	0.186465	0.360617	-0.0150835	0.387776	0.402859	+	0	128.55	1391400000	130	16	16	16	454	454	51.16	52.9	2.44515	-0.402859	-4.06908	N1LRR4	N1LRR4	>tr|N1LRR4|N1LRR4_9BACI ATP-dependent RNA helicase BA2475 OS=Bacillus sp. GeD10 GN=EBGED10_26610 PE=4 SV=1	N1LRR4		ATP-dependent RNA helicase BA2475	>tr|N1LRR4|N1LRR4_9BACI ATP-dependent RNA helicase BA2475 OS=Bacillus sp. GeD10	EBGED10_26610
	N1LUH4		bged00305	Catabolite control protein A	EBGED10_50610	K02529		0.340266	2.55334	0.0027968		+	1.80507	1.79376	1.70449	2.00679	1.89569	2.02808	2.16675	2.40514	2.16362	2.14355	1.84116	2.18143	0.340266	+	0	323.31	5615300000	225	14	14	14	332	332	36.93	53.6	2.55334	-0.340266	-4.25062	N1LUH4	N1LUH4	>tr|N1LUH4|N1LUH4_9BACI Catabolite control protein A OS=Bacillus sp. GeD10 GN=EBGED10_50610 PE=4 SV=1	N1LUH4		Catabolite control protein A	>tr|N1LUH4|N1LUH4_9BACI Catabolite control protein A OS=Bacillus sp. GeD10	EBGED10_50610
	N1LTL3		bged00142	GTPase Obg	obg	K03979		0.286089	1.54325	0.0286254		+	2.90532	2.82878	2.88826	3.20387	2.96186	3.17877	3.26695	3.55397	3.17561	3.04323	2.95762	3.2437	0.286089	+	0	323.31	12115000000	395	25	25	25	428	428	47.21	68.5	1.54325	-0.286089	-2.66404	N1LTL3	N1LTL3	>tr|N1LTL3|N1LTL3_9BACI GTPase Obg OS=Bacillus sp. GeD10 GN=obg PE=3 SV=1	N1LTL3		GTPase Obg	>tr|N1LTL3|N1LTL3_9BACI GTPase Obg OS=Bacillus sp. GeD10	obg
	N1LRB9		bged00617	Serine hydroxymethyltransferase	glyA	K00600		-0.288988	1.96229	0.0109072		+	6.5301	6.43562	6.28181	6.37789	6.08247	6.07215	6.03107	6.20896	5.97204	5.97872	6.34158	6.05259	-0.288988	+	0	323.31	104020000000	1631	25	25	25	413	413	45.188	69.7	1.96229	0.288988	3.29702	N1LRB9	N1LRB9	>tr|N1LRB9|N1LRB9_9BACI Serine hydroxymethyltransferase OS=Bacillus sp. GeD10 GN=glyA PE=3 SV=1	N1LRB9		Serine hydroxymethyltransferase	>tr|N1LRB9|N1LRB9_9BACI Serine hydroxymethyltransferase OS=Bacillus sp. GeD10	glyA
	N1LLV5		bged00006	50S ribosomal protein L1	rplA	K02863		-0.45074	1.53113	0.0294351		+	5.32992	5.70302	4.99184	5.40787	5.55124	4.58221	4.8936	5.17942	4.82792	5.24702	5.39678	4.94604	-0.45074	+	0	323.31	74137000000	761	19	19	19	230	230	24.483	75.2	1.53113	0.45074	2.64606	N1LLV5	N1LLV5	>tr|N1LLV5|N1LLV5_9BACI 50S ribosomal protein L1 OS=Bacillus sp. GeD10 GN=rplA PE=3 SV=1	N1LLV5		50S ribosomal protein L1	>tr|N1LLV5|N1LLV5_9BACI 50S ribosomal protein L1 OS=Bacillus sp. GeD10	rplA
	N1LWH3		bged02385	Histidine triad (HIT) nucleotide-binding protein,similarity with At5g48545 and yeast YDL125C (HNT1)	EBGED10_40530	K02503		-0.514461	1.65037	0.0223679		+	2.20234	2.37126	2.27989	2.54591	2.46039	1.23017	1.82251	2.13339	2.19743	1.90399	2.37196	1.8575	-0.514461	+	0	255.14	9388300000	217	11	11	11	144	144	16.083	95.8	1.65037	0.514461	2.82365	N1LWH3	N1LWH3	>tr|N1LWH3|N1LWH3_9BACI Histidine triad (HIT) nucleotide-binding protein,similarity with At5g48545 and yeast YDL125C (HNT1) OS=Bacillus sp. GeD10 GN=EBGED10_40530 PE=4 SV=1	N1LWH3		Histidine triad (HIT) nucleotide-binding protein,similarity with At5g48545 and yeast YDL125C (HNT1)	>tr|N1LWH3|N1LWH3_9BACI Histidine triad (HIT) nucleotide-binding protein,similarity with At5g48545 and yeast YDL125C (HNT1) OS=Bacillus sp. GeD10	EBGED10_40530
	N1M1C5		bged02941	Isochorismatase	EBGED10_58530	K00663		-0.518781	1.88153	0.0131363		+	1.32273	0.907899	1.17109	0.9701	1.54625	0.503974	0.728721	0.477264	1.08675	0.527453	1.18361	0.664834	-0.518781	+	0	323.31	4131800000	155	13	13	13	186	186	20.739	90.9	1.88153	0.518781	3.17294	N1M1C5	N1M1C5	>tr|N1M1C5|N1M1C5_9BACI Isochorismatase OS=Bacillus sp. GeD10 GN=EBGED10_58530 PE=4 SV=1	N1M1C5		Isochorismatase	>tr|N1M1C5|N1M1C5_9BACI Isochorismatase OS=Bacillus sp. GeD10	EBGED10_58530
	N1LK37		bged01357	Dihydroneopterin aldolase	EBGED10_3150	K01633		-0.555992	2.22899	0.00590217		+	1.00776	0.699501	1.00806	0.714783	1.28412	0.569062	0.273641	0.0499036	0.431311	0.610347	0.942845	0.386853	-0.555992	+	0	160.5	3430100000	64	6	6	6	120	120	13.971	70	2.22899	0.555992	3.71636	N1LK37	N1LK37	>tr|N1LK37|N1LK37_9BACI Dihydroneopterin aldolase OS=Bacillus sp. GeD10 GN=EBGED10_3150 PE=4 SV=1	N1LK37		Dihydroneopterin aldolase	>tr|N1LK37|N1LK37_9BACI Dihydroneopterin aldolase OS=Bacillus sp. GeD10	EBGED10_3150
	N1LWG8		#N/A	LemA domain protein	EBGED10_43220	#N/A		-0.574046	1.55028	0.0281658		+	-1.64483	-0.94629	NaN	-1.37291	-0.779453	-1.63381	-1.91601	-1.6928	-1.49556	-2.06141	-1.18587	-1.75992	-0.574046	+	0	230.09	868900000	32	5	5	5	86	86	9.9382	61.6	1.55028	0.574046	2.75828	N1LWG8	N1LWG8	>tr|N1LWG8|N1LWG8_9BACI LemA domain protein OS=Bacillus sp. GeD10 GN=EBGED10_43220 PE=4 SV=1	N1LWG8		LemA domain protein	>tr|N1LWG8|N1LWG8_9BACI LemA domain protein OS=Bacillus sp. GeD10	EBGED10_43220
	N1LKE0		bged00347	Ferric uptake regulation protein FUR	EBGED10_24540	K03711		-0.635793	1.77617	0.0167427		+	2.05692	2.19294	2.248	2.2373	2.54899	1.35783	0.983308	1.8441	1.90828	2.01167	2.25683	1.62104	-0.635793	+	0	230.04	8099500000	167	11	11	11	151	151	17.661	70.9	1.77617	0.635794	3.01277	N1LKE0	N1LKE0	>tr|N1LKE0|N1LKE0_9BACI Ferric uptake regulation protein FUR OS=Bacillus sp. GeD10 GN=EBGED10_24540 PE=4 SV=1	N1LKE0		Ferric uptake regulation protein FUR	>tr|N1LKE0|N1LKE0_9BACI Ferric uptake regulation protein FUR OS=Bacillus sp. GeD10	EBGED10_24540
	N1LTE8		bged02019	DNA-binding protein HBsu	EBGED10_29230	K03530		-0.645822	2.14023	0.0072405		+	5.98094	5.55902	5.11859	5.60195	5.16439	4.99837	4.88507	4.89134	4.91934	4.50167	5.48498	4.83916	-0.645822	+	0	323.31	69185000000	541	5	5	7	90	90	9.729	55.6	2.14023	0.645822	3.57503	N1LTE8	N1LTE8	>tr|N1LTE8|N1LTE8_9BACI DNA-binding protein HBsu OS=Bacillus sp. GeD10 GN=EBGED10_29230 PE=3 SV=1	N1LTE8		DNA-binding protein HBsu	>tr|N1LTE8|N1LTE8_9BACI DNA-binding protein HBsu OS=Bacillus sp. GeD10	EBGED10_29230
	N1LMZ1		bged03294	Lactoylglutathione lyase and related lyases	EBGED10_10450	K01759		-0.654958	1.75832	0.0174452		+	2.01285	2.05297	2.15574	1.47748	2.28513	1.48477	1.66001	1.10509	1.66451	0.795011	1.99684	1.34188	-0.654958	+	0	248.92	4325400000	49	6	6	6	130	130	14.845	59.2	1.75832	0.654958	2.98581	N1LMZ1	N1LMZ1	>tr|N1LMZ1|N1LMZ1_9BACI Lactoylglutathione lyase and related lyases OS=Bacillus sp. GeD10 GN=EBGED10_10450 PE=4 SV=1	N1LMZ1		Lactoylglutathione lyase and related lyases	>tr|N1LMZ1|N1LMZ1_9BACI Lactoylglutathione lyase and related lyases OS=Bacillus sp. GeD10	EBGED10_10450
	N1LT20		bged01568	PTS system, glucose-specific IIA component	EBGED10_44840	K02777		-0.658031	2.37461	0.00422071		+	4.41717	3.8722	3.81028	3.98173	4.34513	3.28227	3.19522	3.74961	3.63439	3.27486	4.0853	3.42727	-0.658031	+	0	323.31	25408000000	460	12	12	12	165	165	17.445	83	2.37461	0.658031	3.95258	N1LT20	N1LT20	>tr|N1LT20|N1LT20_9BACI PTS system, glucose-specific IIA component OS=Bacillus sp. GeD10 GN=EBGED10_44840 PE=4 SV=1	N1LT20		PTS system, glucose-specific IIA component	>tr|N1LT20|N1LT20_9BACI PTS system, glucose-specific IIA component OS=Bacillus sp. GeD10	EBGED10_44840
	N1LYB6		bged03397	Predicted transcriptional regulator	EBGED10_47630	K07729		-0.660544	2.02508	0.0094389		+	-1.04683	-0.833411	-0.622414	-1.36239	-0.446634	-1.62921	-1.78134	-1.12081	-1.56992	-1.51312	-0.862337	-1.52288	-0.660544	+	0	79.039	1001100000	52	5	5	5	115	115	12.97	29.6	2.02508	0.660544	3.39436	N1LYB6	N1LYB6	>tr|N1LYB6|N1LYB6_9BACI Predicted transcriptional regulator OS=Bacillus sp. GeD10 GN=EBGED10_47630 PE=4 SV=1	N1LYB6		Predicted transcriptional regulator	>tr|N1LYB6|N1LYB6_9BACI Predicted transcriptional regulator OS=Bacillus sp. GeD10	EBGED10_47630
	N1LXK5		bged00901	S-ribosylhomocysteine lyase	luxS	K07173		-0.668918	1.6443	0.022683		+	4.33197	4.33086	4.24492	4.30891	4.25846	2.83188	3.77632	4.3101	3.58398	3.62825	4.29502	3.62611	-0.668918	+	0	323.31	31116000000	545	13	13	13	157	157	17.855	92.4	1.6443	0.668918	2.81457	N1LXK5	N1LXK5	>tr|N1LXK5|N1LXK5_9BACI S-ribosylhomocysteine lyase OS=Bacillus sp. GeD10 GN=luxS PE=3 SV=1	N1LXK5		S-ribosylhomocysteine lyase	>tr|N1LXK5|N1LXK5_9BACI S-ribosylhomocysteine lyase OS=Bacillus sp. GeD10	luxS
	N1LSX9		#N/A	General stress protein	EBGED10_50650	K03671		-0.691653	2.10211	0.00790472		+	0.401806	0.838501	0.929867	0.36663	0.455436	-0.650164	-0.144722	0.1587	0.249734	-0.0795748	0.598448	-0.0932052	-0.691653	+	0	144.17	2905700000	92	8	8	8	108	108	12.733	76.9	2.10211	0.691653	3.5149	N1LSX9	N1LSX9	>tr|N1LSX9|N1LSX9_9BACI General stress protein OS=Bacillus sp. GeD10 GN=EBGED10_50650 PE=4 SV=1	N1LSX9		General stress protein	>tr|N1LSX9|N1LSX9_9BACI General stress protein OS=Bacillus sp. GeD10	EBGED10_50650
	N1LZZ8		bged02386	Predicted broad substrate specificity phosphatase	EBGED10_55820	K15640		-0.70254	1.96628	0.0108073		+	NaN	-2.08329	NaN	-2.16442	-1.89562	NaN	-2.98038	-2.75509	NaN	-2.51548	-2.04777	-2.75031	-0.70254	+	0	75.55	266750000	9	6	6	6	190	190	21.201	44.7	1.96628	0.702539	4.50185	N1LZZ8	N1LZZ8	>tr|N1LZZ8|N1LZZ8_9BACI Predicted broad substrate specificity phosphatase OS=Bacillus sp. GeD10 GN=EBGED10_55820 PE=4 SV=1	N1LZZ8		Predicted broad substrate specificity phosphatase	>tr|N1LZZ8|N1LZZ8_9BACI Predicted broad substrate specificity phosphatase OS=Bacillus sp. GeD10	EBGED10_55820
	N1LXX4		bged01493	Probable thiol peroxidase	tpx	K11065		-0.707632	1.86586	0.0136187		+	5.75913	5.82743	6.02094	5.76691	6.36469	4.79322	5.65632	5.40384	5.58575	4.76182	5.94782	5.24019	-0.707632	+	0	323.31	97594000000	731	14	14	14	166	166	17.952	89.8	1.86586	0.707632	3.14902	N1LXX4	N1LXX4	>tr|N1LXX4|N1LXX4_9BACI Probable thiol peroxidase OS=Bacillus sp. GeD10 GN=tpx PE=3 SV=1	N1LXX4		Probable thiol peroxidase	>tr|N1LXX4|N1LXX4_9BACI Probable thiol peroxidase OS=Bacillus sp. GeD10	tpx
	N1LLH4		bged01352	Thioredoxin	EBGED10_23330	K03671		-0.718839	1.84241	0.0143744		+	5.09681	4.92601	4.76005	4.78941	4.93287	4.34699	3.94832	4.06916	4.9376	3.60888	4.90103	4.18219	-0.718839	+	0	323.31	54827000000	393	12	12	12	104	104	11.478	97.1	1.84241	0.718839	3.11326	N1LLH4	N1LLH4	>tr|N1LLH4|N1LLH4_9BACI Thioredoxin OS=Bacillus sp. GeD10 GN=EBGED10_23330 PE=3 SV=1	N1LLH4		Thioredoxin	>tr|N1LLH4|N1LLH4_9BACI Thioredoxin OS=Bacillus sp. GeD10	EBGED10_23330
	N1LDV9		bged03188	Metal-dependent hydrolases of the beta-lactamase superfamily I PhnP protein	EBGED10_3700	K01567		-0.719374	1.51862	0.0302955		+	0.261788	1.15095	0.424452	1.25785	0.750956	-0.27544	-0.152097	-0.324958	0.352146	0.649479	0.7692	0.049826	-0.719374	+	0	183.64	2458300000	53	8	8	8	244	244	26.795	68.4	1.51862	0.719374	2.6275	N1LDV9	N1LDV9	>tr|N1LDV9|N1LDV9_9BACI Metal-dependent hydrolases of the beta-lactamase superfamily I PhnP protein OS=Bacillus sp. GeD10 GN=EBGED10_3700 PE=4 SV=1	N1LDV9		Metal-dependent hydrolases of the beta-lactamase superfamily I PhnP protein	>tr|N1LDV9|N1LDV9_9BACI Metal-dependent hydrolases of the beta-lactamase superfamily I PhnP protein OS=Bacillus sp. GeD10	EBGED10_3700
	N1LXS4		bged02300	Transcription state regulatory protein abrB	EBGED10_61150	K06284		-0.724549	1.83316	0.0146839		+	1.80538	1.46148	1.19744	0.655793	1.75386	0.430238	0.872105	0.646336	0.886266	0.416257	1.37479	0.65024	-0.724549	+	0	71.361	3741500000	109	4	4	4	95	95	10.587	28.4	1.83316	0.724549	3.09918	N1LXS4	N1LXS4	>tr|N1LXS4|N1LXS4_9BACI Transcription state regulatory protein abrB OS=Bacillus sp. GeD10 GN=EBGED10_61150 PE=4 SV=1	N1LXS4		Transcription state regulatory protein abrB	>tr|N1LXS4|N1LXS4_9BACI Transcription state regulatory protein abrB OS=Bacillus sp. GeD10	EBGED10_61150
	N1LN18		bged00331	Uncharacterized protein	EBGED10_10800	K03892		-0.732267	2.02248	0.00949563		+	2.5211	3.14302	3.23731	3.0801	3.35596	2.65748	2.41973	2.6165	1.77934	2.2031	3.0675	2.33523	-0.732267	+	0	145.38	12689000000	160	7	7	7	96	96	10.845	66.7	2.02248	0.732267	3.39031	N1LN18	N1LN18	>tr|N1LN18|N1LN18_9BACI Uncharacterized protein OS=Bacillus sp. GeD10 GN=EBGED10_10800 PE=4 SV=1	N1LN18		Uncharacterized protein	>tr|N1LN18|N1LN18_9BACI Uncharacterized protein OS=Bacillus sp. GeD10	EBGED10_10800
	N1LV37		bged02369	Hut operon positive regulatory protein	hutP	K09683		-0.743801	1.64982	0.0223966		+	-1.89972	-2.10892	-1.75336	-1.62695	-1.34438	-3.2723	-2.46872	-2.01958	-2.04383	-2.64789	-1.74666	-2.49046	-0.743801	+	0	55.182	504010000	40	4	4	4	146	146	15.822	37.7	1.64982	0.7438	2.82282	N1LV37	N1LV37	>tr|N1LV37|N1LV37_9BACI Hut operon positive regulatory protein OS=Bacillus sp. GeD10 GN=hutP PE=3 SV=1	N1LV37		Hut operon positive regulatory protein	>tr|N1LV37|N1LV37_9BACI Hut operon positive regulatory protein OS=Bacillus sp. GeD10	hutP
	N1M0V8		bged01024	Ribosome maturation factor RimM	rimM	K02860		-0.749155	1.99518	0.0101116		+	2.02236	1.28433	2.04667	2.14448	2.33704	0.80855	1.14262	1.3661	1.61603	1.15582	1.96698	1.21782	-0.749155	+	0	220.18	4939000000	118	10	10	10	171	171	19.451	76	1.99518	0.749155	3.34791	N1M0V8	N1M0V8	>tr|N1M0V8|N1M0V8_9BACI Ribosome maturation factor RimM OS=Bacillus sp. GeD10 GN=rimM PE=3 SV=1	N1M0V8		Ribosome maturation factor RimM	>tr|N1M0V8|N1M0V8_9BACI Ribosome maturation factor RimM OS=Bacillus sp. GeD10	rimM
	N1LMM9		bged02397	Branched-chain alpha-keto acid dehydrogenase, E1 component, beta subunit	EBGED10_25230	K00167		-0.752028	2.07351	0.00844277		+	3.36503	3.37708	3.31302	3.36874	3.40476	1.92305	2.44378	2.61787	2.86533	3.21846	3.36573	2.6137	-0.752028	+	0	323.31	12929000000	347	24	24	24	327	327	35.761	84.4	2.07351	0.752028	3.47	N1LMM9	N1LMM9	>tr|N1LMM9|N1LMM9_9BACI Branched-chain alpha-keto acid dehydrogenase, E1 component, beta subunit OS=Bacillus sp. GeD10 GN=EBGED10_25230 PE=4 SV=1	N1LMM9		Branched-chain alpha-keto acid dehydrogenase, E1 component, beta subunit	>tr|N1LMM9|N1LMM9_9BACI Branched-chain alpha-keto acid dehydrogenase, E1 component, beta subunit OS=Bacillus sp. GeD10	EBGED10_25230
	N1LLG4		#N/A	Fe-bacillibactin uptake system FeuA,Fe-bacillibactin binding	EBGED10_28090	K02016		-0.765814	1.83128	0.0147477		+	-0.702375	-1.03418	-1.13694	-0.555781	-0.540843	-2.13819	-1.70726	-0.829169	-1.44228	-1.68229	-0.794025	-1.55984	-0.765814	+	0	107.19	832020000	44	9	9	9	312	312	35.17	38.8	1.83128	0.765814	3.09632	N1LLG4	N1LLG4	>tr|N1LLG4|N1LLG4_9BACI Fe-bacillibactin uptake system FeuA,Fe-bacillibactin binding OS=Bacillus sp. GeD10 GN=EBGED10_28090 PE=4 SV=1	N1LLG4		Fe-bacillibactin uptake system FeuA,Fe-bacillibactin binding	>tr|N1LLG4|N1LLG4_9BACI Fe-bacillibactin uptake system FeuA,Fe-bacillibactin binding OS=Bacillus sp. GeD10	EBGED10_28090
	N1LWC3		bged00179	Pseudouridine synthase	EBGED10_56240	K06180		-0.769289	2.21668	0.00607185		+	1.75138	1.91556	1.63963	2.02309	1.57991	1.13537	0.338724	1.30352	1.40775	0.877758	1.78191	1.01262	-0.769289	+	0	262.16	4382700000	111	10	10	10	302	302	33.958	44	2.21668	0.769289	3.69664	N1LWC3	N1LWC3	>tr|N1LWC3|N1LWC3_9BACI Pseudouridine synthase OS=Bacillus sp. GeD10 GN=EBGED10_56240 PE=3 SV=1	N1LWC3		Pseudouridine synthase	>tr|N1LWC3|N1LWC3_9BACI Pseudouridine synthase OS=Bacillus sp. GeD10	EBGED10_56240
	N1LYE9		bged00528	Adenine phosphoribosyltransferase	apt	K00759		-0.772103	1.7154	0.0192574		+	3.54938	2.79813	3.20027	2.7893	3.64748	1.83444	2.72179	2.57605	2.86677	2.12499	3.19691	2.42481	-0.772103	+	0	323.31	13825000000	352	16	16	16	170	170	18.629	70	1.7154	0.772103	2.92115	N1LYE9	N1LYE9	>tr|N1LYE9|N1LYE9_9BACI Adenine phosphoribosyltransferase OS=Bacillus sp. GeD10 GN=apt PE=3 SV=1	N1LYE9		Adenine phosphoribosyltransferase	>tr|N1LYE9|N1LYE9_9BACI Adenine phosphoribosyltransferase OS=Bacillus sp. GeD10	apt
	N1LI14		bged00298	Transcriptional regulator, MarR family	EBGED10_8750	K15973		-0.772821	2.02172	0.0095121		+	-0.0590392	-0.389645	0.22426	-0.580904	0.134227	-1.08434	-0.549957	-1.15693	-0.456596	-1.28739	-0.13422	-0.907041	-0.772821	+	0	124.11	1459100000	42	7	7	7	148	148	16.8	63.5	2.02172	0.772821	3.38914	N1LI14	N1LI14	>tr|N1LI14|N1LI14_9BACI Transcriptional regulator, MarR family OS=Bacillus sp. GeD10 GN=EBGED10_8750 PE=4 SV=1	N1LI14		Transcriptional regulator, MarR family	>tr|N1LI14|N1LI14_9BACI Transcriptional regulator, MarR family OS=Bacillus sp. GeD10	EBGED10_8750
	N1LUC2		#N/A	Iron-sulfur cluster regulator IscR	EBGED10_50060	K17472		-0.776459	2.33995	0.00457137		+	1.43663	1.865	2.06596	2.2456	2.3569	1.01147	1.4993	1.04975	1.50104	1.02623	1.99402	1.21756	-0.776459	+	0	323.31	6665200000	171	11	11	11	138	138	15.571	85.5	2.33995	0.776459	3.89584	N1LUC2	N1LUC2	>tr|N1LUC2|N1LUC2_9BACI Iron-sulfur cluster regulator IscR OS=Bacillus sp. GeD10 GN=EBGED10_50060 PE=4 SV=1	N1LUC2		Iron-sulfur cluster regulator IscR	>tr|N1LUC2|N1LUC2_9BACI Iron-sulfur cluster regulator IscR OS=Bacillus sp. GeD10	EBGED10_50060
	N1LRG1		bged00396	HTH-type transcriptional regulator Hpr	hpr	K09682		-0.795735	2.60675	0.00247314		+	2.98863	2.65692	2.9118	3.18564	3.20626	1.9317	2.52727	2.32462	2.44888	1.7381	2.98985	2.19412	-0.795735	+	0	323.31	11096000000	317	12	12	12	185	185	21.73	78.4	2.60675	0.795735	4.34157	N1LRG1	N1LRG1	>tr|N1LRG1|N1LRG1_9BACI HTH-type transcriptional regulator Hpr OS=Bacillus sp. GeD10 GN=hpr PE=3 SV=1	N1LRG1		HTH-type transcriptional regulator Hpr	>tr|N1LRG1|N1LRG1_9BACI HTH-type transcriptional regulator Hpr OS=Bacillus sp. GeD10	hpr
	N1LZ43		bged00214	Putative Holliday junction resolvase	EBGED10_50180	K07447		-0.810015	1.66443	0.0216557		+	-0.463749	-0.646739	-0.288133	-0.854739	0.176006	-2.07701	-1.23267	-0.979664	-1.04827	-0.789811	-0.415471	-1.22549	-0.810015	+	0	117.44	1264900000	55	7	7	7	137	137	15.373	51.1	1.66443	0.810015	2.84467	N1LZ43	N1LZ43	>tr|N1LZ43|N1LZ43_9BACI Putative Holliday junction resolvase OS=Bacillus sp. GeD10 GN=EBGED10_50180 PE=3 SV=1	N1LZ43		Putative Holliday junction resolvase	>tr|N1LZ43|N1LZ43_9BACI Putative Holliday junction resolvase OS=Bacillus sp. GeD10	EBGED10_50180
	N1LTF4		bged00917	1-phosphofructokinase	EBGED10_29330	K00882		-0.810857	2.03452	0.00923599		+	1.3214	0.846301	0.860656	1.05063	1.33314	-0.106015	0.717432	0.836039	-0.195466	0.105851	1.08243	0.271568	-0.810857	+	0	263.29	2199900000	136	12	12	12	303	303	32.673	71.6	2.03452	0.810857	3.40906	N1LTF4	N1LTF4	>tr|N1LTF4|N1LTF4_9BACI 1-phosphofructokinase OS=Bacillus sp. GeD10 GN=EBGED10_29330 PE=4 SV=1	N1LTF4		1-phosphofructokinase	>tr|N1LTF4|N1LTF4_9BACI 1-phosphofructokinase OS=Bacillus sp. GeD10	EBGED10_29330
	N1LT29		bged02567	Putative pyruvate, phosphate dikinase regulatory protein	EBGED10_51200	K09773		-0.812184	1.81483	0.0153168		+	1.92865	0.660469	0.900435	0.93662	1.25885	0.122537	0.165279	0.802386	0.00939433	0.524511	1.13701	0.324821	-0.812184	+	0	273.02	1898300000	96	12	12	12	270	270	30.335	55.2	1.81483	0.812184	3.07134	N1LT29	N1LT29	>tr|N1LT29|N1LT29_9BACI Putative pyruvate, phosphate dikinase regulatory protein OS=Bacillus sp. GeD10 GN=EBGED10_51200 PE=3 SV=1	N1LT29		Putative pyruvate, phosphate dikinase regulatory protein	>tr|N1LT29|N1LT29_9BACI Putative pyruvate, phosphate dikinase regulatory protein OS=Bacillus sp. GeD10	EBGED10_51200
	N1LJ85		bged00660	mRNA interferase	EBGED10_20930	K07171		-0.830139	2.08044	0.00830931		+	-0.0226513	0.511407	0.881935	-0.0249683	0.670061	-0.344605	-0.715394	-0.634461	0.127789	-0.568239	0.403157	-0.426982	-0.830139	+	0	323.31	2178100000	74	7	7	7	116	116	12.948	73.3	2.08044	0.830139	3.48085	N1LJ85	N1LJ85	>tr|N1LJ85|N1LJ85_9BACI mRNA interferase OS=Bacillus sp. GeD10 GN=EBGED10_20930 PE=3 SV=1	N1LJ85		mRNA interferase	>tr|N1LJ85|N1LJ85_9BACI mRNA interferase OS=Bacillus sp. GeD10	EBGED10_20930
	N1LVH5		#N/A	Glyoxalase family protein	EBGED10_39670	K01759		-0.834948	2.41276	0.0038658		+	-0.58919	-0.208574	-0.166945	0.0344428	-0.551527	-1.789	-0.998189	-1.11364	-0.899493	-0.856215	-0.296359	-1.13131	-0.834948	+	0	206.3	1211900000	22	6	6	6	127	127	14.695	59.8	2.41276	0.834949	4.01541	N1LVH5	N1LVH5	>tr|N1LVH5|N1LVH5_9BACI Glyoxalase family protein OS=Bacillus sp. GeD10 GN=EBGED10_39670 PE=4 SV=1	N1LVH5		Glyoxalase family protein	>tr|N1LVH5|N1LVH5_9BACI Glyoxalase family protein OS=Bacillus sp. GeD10	EBGED10_39670
	N1LI46		bged02687	Pyridoxal 5-phosphate synthase subunit PdxS	pdxS	K06215		-0.838412	2.43098	0.00370702		+	8.1287	7.70277	7.02855	7.40934	7.45247	6.65044	6.4279	6.88847	6.97461	6.58835	7.54437	6.70595	-0.838412	+	0	323.31	200750000000	1396	22	22	22	295	295	31.819	79.7	2.43098	0.838412	4.04556	N1LI46	N1LI46	>tr|N1LI46|N1LI46_9BACI Pyridoxal 5-phosphate synthase subunit PdxS OS=Bacillus sp. GeD10 GN=pdxS PE=3 SV=1	N1LI46		Pyridoxal 5-phosphate synthase subunit PdxS	>tr|N1LI46|N1LI46_9BACI Pyridoxal 5-phosphate synthase subunit PdxS OS=Bacillus sp. GeD10	pdxS
	N1LXD1		#N/A	SpoVS-related protein, type 1	EBGED10_61270	K06416		-0.841327	2.28967	0.00513252		+	1.25558	1.54574	1.1542	1.1983	1.77965	1.02056	0.424075	0.696583	-0.0917249	0.677324	1.38669	0.545364	-0.841327	+	0	196.38	3725500000	47	3	3	3	91	91	9.4138	67	2.28967	0.841327	3.81411	N1LXD1	N1LXD1	>tr|N1LXD1|N1LXD1_9BACI SpoVS-related protein, type 1 OS=Bacillus sp. GeD10 GN=EBGED10_61270 PE=4 SV=1	N1LXD1		SpoVS-related protein, type 1	>tr|N1LXD1|N1LXD1_9BACI SpoVS-related protein, type 1 OS=Bacillus sp. GeD10	EBGED10_61270
	N1LKU9		bged00947	10 kDa chaperonin	groS	K04078		-0.841974	2.64059	0.00228774		+	6.52937	6.44129	6.58667	5.74229	6.53174	5.74961	5.63636	5.24489	5.70961	5.28102	6.36627	5.5243	-0.841974	+	0	277.5	112280000000	1314	10	10	10	94	94	10.055	76.6	2.64059	0.841974	4.39968	N1LKU9	N1LKU9	>tr|N1LKU9|N1LKU9_9BACI 10 kDa chaperonin OS=Bacillus sp. GeD10 GN=groS PE=3 SV=1	N1LKU9		10 kDa chaperonin	>tr|N1LKU9|N1LKU9_9BACI 10 kDa chaperonin OS=Bacillus sp. GeD10	groS
	N1LLB1		bged00450	50S ribosomal protein L6	rplF	K02933		-0.846795	2.60719	0.00247062		+	5.51764	4.96308	5.10023	5.65308	5.15497	4.16529	4.37929	4.82446	4.69759	4.08838	5.2778	4.431	-0.846795	+	0	323.31	73498000000	1433	16	16	16	179	179	19.515	72.6	2.60719	0.846795	4.34233	N1LLB1	N1LLB1	>tr|N1LLB1|N1LLB1_9BACI 50S ribosomal protein L6 OS=Bacillus sp. GeD10 GN=rplF PE=3 SV=1	N1LLB1		50S ribosomal protein L6	>tr|N1LLB1|N1LLB1_9BACI 50S ribosomal protein L6 OS=Bacillus sp. GeD10	rplF
	N1LU03		bged00956	Cell division protein ZapA	zapA	K09888		-0.849479	2.04488	0.00901827		+	-0.96183	-0.745905	-0.911347	-1.3355	-0.469572	-2.43553	-1.50117	-1.83527	-1.21472	-1.68485	-0.884831	-1.73431	-0.849479	+	0	37.169	807210000	30	3	3	3	89	89	10.12	51.7	2.04488	0.849479	3.42521	N1LU03	N1LU03	>tr|N1LU03|N1LU03_9BACI Cell division protein ZapA OS=Bacillus sp. GeD10 GN=zapA PE=3 SV=1	N1LU03		Cell division protein ZapA	>tr|N1LU03|N1LU03_9BACI Cell division protein ZapA OS=Bacillus sp. GeD10	zapA
	N1LUK2		bged00491	DNA-directed RNA polymerase subunit omega	rpoZ	K03060		-0.856157	2.51843	0.00303087		+	-1.65398	-1.7447	-1.36993	-1.94263	-1.15011	-2.52657	-2.32244	-1.90199	-2.71687	-2.67428	-1.57227	-2.42843	-0.856157	+	0	15.712	526960000	35	2	2	2	70	70	7.6888	42.9	2.51843	0.856157	4.19166	N1LUK2	N1LUK2	>tr|N1LUK2|N1LUK2_9BACI DNA-directed RNA polymerase subunit omega OS=Bacillus sp. GeD10 GN=rpoZ PE=3 SV=1	N1LUK2		DNA-directed RNA polymerase subunit omega	>tr|N1LUK2|N1LUK2_9BACI DNA-directed RNA polymerase subunit omega OS=Bacillus sp. GeD10	rpoZ
	N1LWD3		bged00129	Orotate phosphoribosyltransferase	pyrE	K00762		-0.862333	1.66849	0.021454		+	4.02701	3.00123	3.1812	3.35459	3.83587	1.92387	2.91936	3.04884	2.20382	2.99235	3.47998	2.61765	-0.862333	+	0	323.31	14181000000	285	14	14	14	210	210	22.743	84.8	1.66849	0.862333	2.85076	N1LWD3	N1LWD3	>tr|N1LWD3|N1LWD3_9BACI Orotate phosphoribosyltransferase OS=Bacillus sp. GeD10 GN=pyrE PE=3 SV=1	N1LWD3		Orotate phosphoribosyltransferase	>tr|N1LWD3|N1LWD3_9BACI Orotate phosphoribosyltransferase OS=Bacillus sp. GeD10	pyrE
	N1LU37		bged00084	Chemotaxis regulator-transmits chemoreceptor signals to flagelllar motor components CheY	EBGED10_32280	K03413		-0.87573	2.59181	0.00255971		+	1.20619	0.697664	1.1172	1.50085	1.33288	-0.221712	0.405689	0.715305	0.242569	0.334284	1.17096	0.295227	-0.87573	+	0	204.75	3446700000	70	8	8	8	122	122	13.355	76.2	2.59181	0.87573	4.31604	N1LU37	N1LU37	>tr|N1LU37|N1LU37_9BACI Chemotaxis regulator-transmits chemoreceptor signals to flagelllar motor components CheY OS=Bacillus sp. GeD10 GN=EBGED10_32280 PE=4 SV=1	N1LU37		Chemotaxis regulator-transmits chemoreceptor signals to flagelllar motor components CheY	>tr|N1LU37|N1LU37_9BACI Chemotaxis regulator-transmits chemoreceptor signals to flagelllar motor components CheY OS=Bacillus sp. GeD10	EBGED10_32280
	N1LWW2		#N/A	UPF0234 protein EBGED10	EBGED10_59210	K09767		-0.879259	1.56798	0.0270409		+	3.29276	3.1281	3.11911	3.34709	3.39088	1.13406	2.53395	2.70227	2.97325	2.53811	3.25559	2.37633	-0.879259	+	0	323.31	16106000000	349	20	20	20	163	163	18.429	82.8	1.56798	0.879259	2.70079	N1LWW2	N1LWW2	>tr|N1LWW2|N1LWW2_9BACI UPF0234 protein EBGED10_59210 OS=Bacillus sp. GeD10 GN=EBGED10_59210 PE=3 SV=1	N1LWW2		UPF0234 protein EBGED10	>tr|N1LWW2|N1LWW2_9BACI UPF0234 protein EBGED10_59210 OS=Bacillus sp. GeD10	EBGED10_59210
	N1LRS5		bged03189	Hydrolase, HAD subfamily IIIA	EBGED10_46550	K07015		-0.890843	1.61515	0.0242578		+	-0.870832	-1.59467	-0.610041	-1.12197	-0.218883	-2.65345	-1.64432	-1.48716	-1.47827	-1.60742	-0.88328	-1.77412	-0.890843	+	0	186.71	815550000	51	6	6	6	170	170	19.713	64.7	1.61515	0.890843	2.77104	N1LRS5	N1LRS5	>tr|N1LRS5|N1LRS5_9BACI Hydrolase, HAD subfamily IIIA OS=Bacillus sp. GeD10 GN=EBGED10_46550 PE=4 SV=1	N1LRS5		Hydrolase, HAD subfamily IIIA	>tr|N1LRS5|N1LRS5_9BACI Hydrolase, HAD subfamily IIIA OS=Bacillus sp. GeD10	EBGED10_46550
	N1LJH8		bged00332	Transcriptional regulator, ArsR family	EBGED10_16340	K03892		-0.892552	2.83445	0.00146404		+	0.971839	1.52584	1.59319	1.87685	1.66587	1.04429	0.502992	0.37743	0.663891	0.582225	1.52672	0.634165	-0.892552	+	0	199.15	4476800000	156	8	8	8	95	95	11.157	73.7	2.83445	0.892552	4.73996	N1LJH8	N1LJH8	>tr|N1LJH8|N1LJH8_9BACI Transcriptional regulator, ArsR family OS=Bacillus sp. GeD10 GN=EBGED10_16340 PE=4 SV=1	N1LJH8		Transcriptional regulator, ArsR family	>tr|N1LJH8|N1LJH8_9BACI Transcriptional regulator, ArsR family OS=Bacillus sp. GeD10	EBGED10_16340
	N1M0Y8		bged00437	30S ribosomal protein S15	rpsO	K02956		-0.916685	2.78347	0.00164636		+	6.78368	7.00388	7.2645	6.70965	6.77227	6.25787	5.74923	6.01365	6.43206	5.49774	6.9068	5.99011	-0.916685	+	0	323.31	166890000000	391	7	7	7	89	89	10.56	65.2	2.78347	0.916685	4.64921	N1M0Y8	N1M0Y8	>tr|N1M0Y8|N1M0Y8_9BACI 30S ribosomal protein S15 OS=Bacillus sp. GeD10 GN=rpsO PE=3 SV=1	N1M0Y8		30S ribosomal protein S15	>tr|N1M0Y8|N1M0Y8_9BACI 30S ribosomal protein S15 OS=Bacillus sp. GeD10	rpsO
	N1LRX1		#N/A	Carbonic anhydrase, family 3	EBGED10_40940	K00680		-0.918478	3.00319	0.000992693		+	-0.521012	-0.573344	-0.721054	-0.43965	-0.895366	-1.7579	-1.92119	-0.958448	-1.57856	-1.52672	-0.630085	-1.54856	-0.918478	+	0	120.23	698950000	62	3	3	3	170	170	18.84	47.1	3.00319	0.918479	5.04721	N1LRX1	N1LRX1	>tr|N1LRX1|N1LRX1_9BACI Carbonic anhydrase, family 3 OS=Bacillus sp. GeD10 GN=EBGED10_40940 PE=4 SV=1	N1LRX1		Carbonic anhydrase, family 3	>tr|N1LRX1|N1LRX1_9BACI Carbonic anhydrase, family 3 OS=Bacillus sp. GeD10	EBGED10_40940
	N1LQ39		bged00459	30S ribosomal protein S6	rpsF	K02990		-0.925714	2.00332	0.00992374		+	5.65266	6.21535	5.77813	6.13793	6.13859	4.63872	4.81171	5.37152	5.89416	4.57796	5.98453	5.05882	-0.925714	+	0	323.31	128950000000	984	16	16	16	96	96	11.299	89.6	2.00332	0.925713	3.36055	N1LQ39	N1LQ39	>tr|N1LQ39|N1LQ39_9BACI 30S ribosomal protein S6 OS=Bacillus sp. GeD10 GN=rpsF PE=3 SV=1	N1LQ39		30S ribosomal protein S6	>tr|N1LQ39|N1LQ39_9BACI 30S ribosomal protein S6 OS=Bacillus sp. GeD10	rpsF
	N1LQR2		bged00440	30S ribosomal protein S11	rpsK	K02948		-0.926735	1.92895	0.0117773		+	6.55969	5.90267	6.25707	5.53241	6.15175	4.30671	5.1916	5.18521	5.47456	5.61182	6.08072	5.15398	-0.926735	+	0	323.31	93925000000	493	7	7	7	129	129	13.753	63.6	1.92895	0.926735	3.24566	N1LQR2	N1LQR2	>tr|N1LQR2|N1LQR2_9BACI 30S ribosomal protein S11 OS=Bacillus sp. GeD10 GN=rpsK PE=3 SV=1	N1LQR2		30S ribosomal protein S11	>tr|N1LQR2|N1LQR2_9BACI 30S ribosomal protein S11 OS=Bacillus sp. GeD10	rpsK
	N1LLA6		bged00453	50S ribosomal protein L14	rplN	K02874		-0.93177	1.71233	0.019394		+	6.30724	6.39	5.82488	5.08484	6.00869	5.82536	4.59508	4.68457	4.90544	4.94635	5.92313	4.99136	-0.93177	+	0	298.57	91443000000	734	11	11	11	122	122	13.12	64.8	1.71233	0.93177	2.91653	N1LLA6	N1LLA6	>tr|N1LLA6|N1LLA6_9BACI 50S ribosomal protein L14 OS=Bacillus sp. GeD10 GN=rplN PE=3 SV=1	N1LLA6		50S ribosomal protein L14	>tr|N1LLA6|N1LLA6_9BACI 50S ribosomal protein L14 OS=Bacillus sp. GeD10	rplN
	N1LYF5		#N/A	Free methionine-(R)-sulfoxide reductase, contains GAF domain	EBGED10_48030	K07170		-0.939127	2.41062	0.00388491		+	1.61441	1.93749	1.9388	2.4371	1.93106	0.539472	1.22231	1.6577	0.986317	0.757431	1.97177	1.03265	-0.939127	+	0	213.25	6442400000	145	10	10	10	159	159	17.462	86.2	2.41062	0.939128	4.01187	N1LYF5	N1LYF5	>tr|N1LYF5|N1LYF5_9BACI Free methionine-(R)-sulfoxide reductase, contains GAF domain OS=Bacillus sp. GeD10 GN=EBGED10_48030 PE=4 SV=1	N1LYF5		Free methionine-(R)-sulfoxide reductase, contains GAF domain	>tr|N1LYF5|N1LYF5_9BACI Free methionine-(R)-sulfoxide reductase, contains GAF domain OS=Bacillus sp. GeD10	EBGED10_48030
	N1M087		bged00943	Ribosome biogenesis GTPase A	EBGED10_56770	K14540		-0.94645	3.44452	0.000359321		+	1.56417	1.3067	0.911172	1.60711	1.80591	0.409143	0.370196	0.585815	0.517164	0.58049	1.43901	0.492561	-0.94645	+	0	231.13	3318000000	96	11	11	11	296	296	33.376	40.2	3.44452	0.94645	5.90597	N1M087	N1M087	>tr|N1M087|N1M087_9BACI Ribosome biogenesis GTPase A OS=Bacillus sp. GeD10 GN=EBGED10_56770 PE=3 SV=1	N1M087		Ribosome biogenesis GTPase A	>tr|N1M087|N1M087_9BACI Ribosome biogenesis GTPase A OS=Bacillus sp. GeD10	EBGED10_56770
	N1LKI4		#N/A	Uncharacterized protein	EBGED10_25040	#N/A		-0.948544	2.29863	0.00502771		+	-0.917054	-0.727099	-0.693873	-0.518282	-0.0483835	-2.30059	-1.25216	-1.22047	-1.50383	-1.37036	-0.580938	-1.52948	-0.948544	+	0	126.39	1046900000	30	5	5	5	83	83	9.5684	92.8	2.29863	0.948544	3.82863	N1LKI4	N1LKI4	>tr|N1LKI4|N1LKI4_9BACI Uncharacterized protein OS=Bacillus sp. GeD10 GN=EBGED10_25040 PE=4 SV=1	N1LKI4		Uncharacterized protein	>tr|N1LKI4|N1LKI4_9BACI Uncharacterized protein OS=Bacillus sp. GeD10	EBGED10_25040
	N1LGK6		bged00973	Cold shock protein CspG	EBGED10_12380	K03704		-0.950114	2.73225	0.00185248		+	2.46456	2.47916	2.08635	2.16237	2.47787	2.05934	1.38694	1.42765	1.03462	1.01118	2.33406	1.38395	-0.950114	+	0	323.31	6927400000	409	3	3	3	67	67	7.3391	71.6	2.73225	0.950114	4.55894	N1LGK6	N1LGK6	>tr|N1LGK6|N1LGK6_9BACI Cold shock protein CspG OS=Bacillus sp. GeD10 GN=EBGED10_12380 PE=4 SV=1	N1LGK6		Cold shock protein CspG	>tr|N1LGK6|N1LGK6_9BACI Cold shock protein CspG OS=Bacillus sp. GeD10	EBGED10_12380
	N1LZR3		bged00914	Acireductone dioxygenase	mtnD	K08967		-0.956462	2.76957	0.00169993		+	0.188047	0.604154	0.499315	0.669458	1.03308	-0.40582	-0.438461	-0.351933	0.187079	-0.779117	0.598811	-0.357651	-0.956462	+	0	188.52	2190800000	89	11	11	11	170	170	19.594	71.2	2.76957	0.956462	4.62462	N1LZR3	N1LZR3	>tr|N1LZR3|N1LZR3_9BACI Acireductone dioxygenase OS=Bacillus sp. GeD10 GN=mtnD PE=3 SV=1	N1LZR3		Acireductone dioxygenase	>tr|N1LZR3|N1LZR3_9BACI Acireductone dioxygenase OS=Bacillus sp. GeD10	mtnD
	N1LVM1		bged02740	GNAT family acetyltransferase YYaT	EBGED10_37580	K00680		-0.958588	2.39494	0.00402772		+	-0.431271	-0.424815	-0.0331773	-0.423278	0.172085	-1.80222	-0.879199	-1.08822	-0.672376	-1.49138	-0.228091	-1.18668	-0.958588	+	0	105.04	1233000000	43	4	4	4	144	144	16.464	29.2	2.39494	0.958588	3.98601	N1LVM1	N1LVM1	>tr|N1LVM1|N1LVM1_9BACI GNAT family acetyltransferase YYaT OS=Bacillus sp. GeD10 GN=EBGED10_37580 PE=4 SV=1	N1LVM1		GNAT family acetyltransferase YYaT	>tr|N1LVM1|N1LVM1_9BACI GNAT family acetyltransferase YYaT OS=Bacillus sp. GeD10	EBGED10_37580
	N1LKY8		bged00993	Putative tRNA (cytidine(34)-2-O)-methyltransferase	EBGED10_2810	K03216		-0.959614	1.80892	0.0155266		+	2.70987	2.81347	3.54757	2.79881	3.81255	1.45059	2.36146	2.57133	2.57402	1.92679	3.13645	2.17684	-0.959614	+	0	323.31	11595000000	308	12	12	12	162	162	18.827	83.3	1.80892	0.959614	3.06237	N1LKY8	N1LKY8	>tr|N1LKY8|N1LKY8_9BACI Putative tRNA (cytidine(34)-2-O)-methyltransferase OS=Bacillus sp. GeD10 GN=EBGED10_2810 PE=3 SV=1	N1LKY8		Putative tRNA (cytidine(34)-2-O)-methyltransferase	>tr|N1LKY8|N1LKY8_9BACI Putative tRNA (cytidine(34)-2-O)-methyltransferase OS=Bacillus sp. GeD10	EBGED10_2810
	N1LXZ3		bged02707	Universal stress protein	EBGED10_48320	K09936		-0.960905	2.1899	0.00645799		+	5.26689	5.52386	5.22565	5.42035	5.87238	3.76273	4.394	4.47481	5.23548	4.63757	5.46182	4.50092	-0.960905	+	0	323.31	60507000000	867	16	16	16	152	152	16.71	82.2	2.1899	0.960905	3.65389	N1LXZ3	N1LXZ3	>tr|N1LXZ3|N1LXZ3_9BACI Universal stress protein OS=Bacillus sp. GeD10 GN=EBGED10_48320 PE=3 SV=1	N1LXZ3		Universal stress protein	>tr|N1LXZ3|N1LXZ3_9BACI Universal stress protein OS=Bacillus sp. GeD10	EBGED10_48320
	N1LXU5		#N/A	Transcriptional regulator, AraC family	EBGED10_45530	K13653		-0.962331	1.96386	0.0108677		+	-2.31901	-2.84305	-2.49711	NaN	-1.91214	-3.88778	-2.96561	-3.5665	-2.84191	-3.51399	-2.39283	-3.35516	-0.962331	+	0	38.223	248430000	25	3	3	3	159	159	18.259	27.7	1.96386	0.962332	3.43792	N1LXU5	N1LXU5	>tr|N1LXU5|N1LXU5_9BACI Transcriptional regulator, AraC family OS=Bacillus sp. GeD10 GN=EBGED10_45530 PE=4 SV=1	N1LXU5		Transcriptional regulator, AraC family	>tr|N1LXU5|N1LXU5_9BACI Transcriptional regulator, AraC family OS=Bacillus sp. GeD10	EBGED10_45530
	N1LWE1		#N/A	UPF0145 protein EBGED10	EBGED10_40080	#N/A		-0.964074	2.31271	0.00486729		+	0.420842	0.275956	-0.00416896	0.571639	0.516704	-1.34128	-0.358413	0.0322415	-0.590032	-0.781919	0.356195	-0.60788	-0.964074	+	0	111.32	2025500000	107	NaN	8	8	NaN	103	11.035	82.5	2.31271	0.964074	3.85148	N1LWE1;N1LQB0;N1LSQ0	N1LWE1;N1LQB0	>tr|N1LWE1|N1LWE1_9BACI UPF0145 protein EBGED10_40080 OS=Bacillus sp. GeD10 GN=EBGED10_40080 PE=3 SV=1;>tr|N1LQB0|N1LQB0_9BACI UPF0145 protein EBGED10_18300 OS=Bacillus sp. GeD10 GN=EBGED10_18300 PE=3 SV=1	N1LWE1		UPF0145 protein EBGED10	>tr|N1LWE1|N1LWE1_9BACI UPF0145 protein EBGED10_40080 OS=Bacillus sp. GeD10	EBGED10_40080
	N1LS81		#N/A	Uncharacterized protein	EBGED10_25170	#N/A		-0.964578	1.51688	0.0304171		+	0.313812	0.371027	0.426033	0.666274	0.708768	-1.89654	-0.202146	-0.00569294	-0.106076	-0.126526	0.497183	-0.467395	-0.964578	+	0	204.42	2191600000	76	11	11	11	144	144	16.058	71.5	1.51688	0.964578	2.62492	N1LS81	N1LS81	>tr|N1LS81|N1LS81_9BACI Uncharacterized protein OS=Bacillus sp. GeD10 GN=EBGED10_25170 PE=4 SV=1	N1LS81		Uncharacterized protein	>tr|N1LS81|N1LS81_9BACI Uncharacterized protein OS=Bacillus sp. GeD10	EBGED10_25170
	N1LY40		bged02341	Formamidopyrimidine-DNA glycosylase	mutM	K10563		-0.966077	1.51407	0.0306144		+	-1.28471	-1.90214	-2.00066	-1.17087	-1.49486	-3.56999	-2.18428	-2.08464	-2.30799	NaN	-1.57065	-2.53673	-0.966077	+	0	53.79	455480000	36	8	8	8	276	276	31.717	28.3	1.51407	0.966077	2.70056	N1LY40	N1LY40	>tr|N1LY40|N1LY40_9BACI Formamidopyrimidine-DNA glycosylase OS=Bacillus sp. GeD10 GN=mutM PE=3 SV=1	N1LY40		Formamidopyrimidine-DNA glycosylase	>tr|N1LY40|N1LY40_9BACI Formamidopyrimidine-DNA glycosylase OS=Bacillus sp. GeD10	mutM
	N1LQM9		bged00456	50S ribosomal protein L4	rplD	K02926		-0.976375	2.78302	0.00164809		+	7.33409	6.43574	6.37277	6.62216	7.0349	5.57269	6.1555	5.67476	5.81711	5.69773	6.75993	5.78356	-0.976375	+	0	323.31	131310000000	1140	12	12	12	207	207	22.53	68.1	2.78302	0.976375	4.64841	N1LQM9	N1LQM9	>tr|N1LQM9|N1LQM9_9BACI 50S ribosomal protein L4 OS=Bacillus sp. GeD10 GN=rplD PE=3 SV=1	N1LQM9		50S ribosomal protein L4	>tr|N1LQM9|N1LQM9_9BACI 50S ribosomal protein L4 OS=Bacillus sp. GeD10	rplD
	N1LHE1		#N/A	Uncharacterized protein	EBGED10_14630	#N/A		-0.97709	2.97573	0.00105748		+	1.70608	1.42496	1.65497	1.49222	2.21624	0.222905	0.795466	1.05705	0.824641	0.708957	1.69889	0.721805	-0.97709	+	0	221.74	4450600000	82	10	10	10	174	174	19.424	56.9	2.97573	0.97709	4.99647	N1LHE1	N1LHE1	>tr|N1LHE1|N1LHE1_9BACI Uncharacterized protein OS=Bacillus sp. GeD10 GN=EBGED10_14630 PE=4 SV=1	N1LHE1		Uncharacterized protein	>tr|N1LHE1|N1LHE1_9BACI Uncharacterized protein OS=Bacillus sp. GeD10	EBGED10_14630
	N1M0B5		bged02657	Ribosomal protein L7Ae family protein	EBGED10_57020	K07742		-0.977986	2.69826	0.00200326		+	0.530297	0.546362	0.69438	0.246452	1.10804	-0.418434	-0.934602	-0.118251	-0.327331	0.0342145	0.625106	-0.352881	-0.977986	+	0	87.949	2347800000	84	8	8	8	103	103	11.682	57.3	2.69826	0.977986	4.49956	N1M0B5	N1M0B5	>tr|N1M0B5|N1M0B5_9BACI Ribosomal protein L7Ae family protein OS=Bacillus sp. GeD10 GN=EBGED10_57020 PE=4 SV=1	N1M0B5		Ribosomal protein L7Ae family protein	>tr|N1M0B5|N1M0B5_9BACI Ribosomal protein L7Ae family protein OS=Bacillus sp. GeD10	EBGED10_57020
	N1LM05		bged00435	50S ribosomal protein L17	rplQ	K02879		-0.978813	1.90571	0.0124247		+	6.94658	6.99981	6.37413	6.93842	6.30064	4.7332	6.06985	6.2373	5.75316	5.87199	6.71191	5.7331	-0.978813	+	0	271.02	170440000000	432	7	7	7	120	120	13.449	45.8	1.90571	0.978813	3.20998	N1LM05	N1LM05	>tr|N1LM05|N1LM05_9BACI 50S ribosomal protein L17 OS=Bacillus sp. GeD10 GN=rplQ PE=3 SV=1	N1LM05		50S ribosomal protein L17	>tr|N1LM05|N1LM05_9BACI 50S ribosomal protein L17 OS=Bacillus sp. GeD10	rplQ
	N1LL38		bged02299	Transition state regulatory protein AbrB	EBGED10_3510	K06284		-0.991578	5.23096	5.87538e-06		+	2.41761	2.49732	2.65347	2.41739	2.6997	1.77396	1.53298	1.63507	1.41583	1.36976	2.5371	1.54552	-0.991578	+	0	208.45	8271200000	157	10	10	11	94	94	10.49	84	5.23096	0.991578	10.5035	N1LL38	N1LL38	>tr|N1LL38|N1LL38_9BACI Transition state regulatory protein AbrB OS=Bacillus sp. GeD10 GN=EBGED10_3510 PE=4 SV=1	N1LL38		Transition state regulatory protein AbrB	>tr|N1LL38|N1LL38_9BACI Transition state regulatory protein AbrB OS=Bacillus sp. GeD10	EBGED10_3510
	N1LJS3		bged02372	50S ribosomal protein L10	rplJ	K02864		-0.998118	1.56809	0.027034		+	6.9839	5.56662	5.54868	5.90082	5.64099	4.39238	4.27841	5.39348	5.11052	5.47563	5.9282	4.93008	-0.998118	+	0	323.31	101400000000	903	14	14	14	166	166	18.037	67.5	1.56809	0.998117	2.70096	N1LJS3	N1LJS3	>tr|N1LJS3|N1LJS3_9BACI 50S ribosomal protein L10 OS=Bacillus sp. GeD10 GN=rplJ PE=3 SV=1	N1LJS3		50S ribosomal protein L10	>tr|N1LJS3|N1LJS3_9BACI 50S ribosomal protein L10 OS=Bacillus sp. GeD10	rplJ
	N1LW65		#N/A	COG2740: Predicted nucleic-acid-binding protein implicated in transcription termination	EBGED10_57010	K07742		-0.999658	3.04168	0.000908489		+	0.0378864	-0.493318	0.565023	-0.435178	-0.0473657	-1.05613	-0.934602	-1.11229	-1.07725	-1.19097	-0.0745905	-1.07425	-0.999658	+	0	96.494	1106700000	55	6	6	6	90	90	10.266	50	3.04168	0.999658	5.11884	N1LW65	N1LW65	>tr|N1LW65|N1LW65_9BACI COG2740: Predicted nucleic-acid-binding protein implicated in transcription termination OS=Bacillus sp. GeD10 GN=EBGED10_57010 PE=4 SV=1	N1LW65		COG2740: Predicted nucleic-acid-binding protein implicated in transcription termination	>tr|N1LW65|N1LW65_9BACI COG2740: Predicted nucleic-acid-binding protein implicated in transcription termination OS=Bacillus sp. GeD10	EBGED10_57010
	N1LXF9		bged00736	Phosphohydrolase (MutT/nudix family protein)	EBGED10_59740	K07006		-1.00127	3.01943	0.000956237		+	1.22875	1.43822	0.746879	1.74432	1.01405	0.0633886	0.288227	0.515732	0.328398	-0.0298568	1.23444	0.233178	-1.00127	+	0	70.188	3194700000	50	4	4	4	212	212	24.055	21.7	3.01943	1.00127	5.07737	N1LXF9	N1LXF9	>tr|N1LXF9|N1LXF9_9BACI Phosphohydrolase (MutT/nudix family protein) OS=Bacillus sp. GeD10 GN=EBGED10_59740 PE=4 SV=1	N1LXF9		Phosphohydrolase (MutT/nudix family protein)	>tr|N1LXF9|N1LXF9_9BACI Phosphohydrolase (MutT/nudix family protein) OS=Bacillus sp. GeD10	EBGED10_59740
	N1LP12		bged01399	Glutathione peroxidase	EBGED10_30490	K00432		-1.00621	2.03062	0.00931922		+	0.255525	0.17898	0.387421	0.596454	0.926076	-1.4184	-0.845182	-0.0539318	-0.0552663	-0.31381	0.468891	-0.537318	-1.00621	+	0	20.319	1935600000	66	7	7	7	160	160	17.782	37.5	2.03062	1.00621	3.40299	N1LP12	N1LP12	>tr|N1LP12|N1LP12_9BACI Glutathione peroxidase OS=Bacillus sp. GeD10 GN=EBGED10_30490 PE=3 SV=1	N1LP12		Glutathione peroxidase	>tr|N1LP12|N1LP12_9BACI Glutathione peroxidase OS=Bacillus sp. GeD10	EBGED10_30490
	N1LH40		#N/A	N-acetylmuramoyl-L-alanine amidase	EBGED10_8120	K19223		-1.01098	1.50462	0.0312884		+	-2.0942	-1.54869	-1.19798	-1.70118	-0.82876	-3.59955	-2.81295	-2.0817	-2.0712	-1.86028	-1.47416	-2.48514	-1.01098	+	0	37.283	626590000	37	6	6	6	441	441	48.322	15.6	1.50462	1.01098	2.60674	N1LH40	N1LH40	>tr|N1LH40|N1LH40_9BACI N-acetylmuramoyl-L-alanine amidase OS=Bacillus sp. GeD10 GN=EBGED10_8120 PE=4 SV=1	N1LH40		N-acetylmuramoyl-L-alanine amidase	>tr|N1LH40|N1LH40_9BACI N-acetylmuramoyl-L-alanine amidase OS=Bacillus sp. GeD10	EBGED10_8120
	N1LSB8		#N/A	Uncharacterized protein	EBGED10_28510	#N/A		-1.01421	1.90899	0.0123314		+	0.210605	0.293075	-0.0974755	0.139533	0.622064	-0.801547	-1.87298	-0.679787	-0.29249	-0.256438	0.23356	-0.780648	-1.01421	+	0	149.44	1814600000	45	3	3	3	106	106	12.009	29.2	1.90899	1.01421	3.215	N1LSB8	N1LSB8	>tr|N1LSB8|N1LSB8_9BACI Uncharacterized protein OS=Bacillus sp. GeD10 GN=EBGED10_28510 PE=4 SV=1	N1LSB8		Uncharacterized protein	>tr|N1LSB8|N1LSB8_9BACI Uncharacterized protein OS=Bacillus sp. GeD10	EBGED10_28510
	N1LJU7		bged00447	30S ribosomal protein S17	rpsQ	K02961		-1.01447	3.89324	0.000127867		+	6.35451	6.26299	6.48685	6.24453	5.90421	5.40699	5.21767	4.96703	5.55916	5.02988	6.25062	5.23614	-1.01447	+	0	118.34	91915000000	1226	10	10	10	87	87	10.189	70.1	3.89324	1.01447	6.87382	N1LJU7	N1LJU7	>tr|N1LJU7|N1LJU7_9BACI 30S ribosomal protein S17 OS=Bacillus sp. GeD10 GN=rpsQ PE=3 SV=1	N1LJU7		30S ribosomal protein S17	>tr|N1LJU7|N1LJU7_9BACI 30S ribosomal protein S17 OS=Bacillus sp. GeD10	rpsQ
	N1LJ27		bged00085	Sporulation initiation phosphotransferase (Spo0F)	EBGED10_14640	K02490		-1.01652	2.52523	0.00298377		+	1.10101	1.14304	1.15186	1.82832	1.55219	-0.38732	0.474331	0.6193	0.288931	0.698549	1.35528	0.338758	-1.01652	+	0	213.59	4258400000	125	14	14	14	122	122	13.801	94.3	2.52523	1.01652	4.20312	N1LJ27	N1LJ27	>tr|N1LJ27|N1LJ27_9BACI Sporulation initiation phosphotransferase (Spo0F) OS=Bacillus sp. GeD10 GN=EBGED10_14640 PE=4 SV=1	N1LJ27		Sporulation initiation phosphotransferase (Spo0F)	>tr|N1LJ27|N1LJ27_9BACI Sporulation initiation phosphotransferase (Spo0F) OS=Bacillus sp. GeD10	EBGED10_14640
	N1LMF8		bged01320	Peptidyl-prolyl cis-trans isomerase	EBGED10_24230	K03768		-1.02288	2.36345	0.00433062		+	3.73166	3.98682	3.68746	3.85371	4.03251	2.28796	2.17347	3.37108	3.23414	3.11111	3.85843	2.83555	-1.02288	+	0	323.31	24040000000	358	9	9	9	145	145	15.788	84.1	2.36345	1.02288	3.93427	N1LMF8	N1LMF8	>tr|N1LMF8|N1LMF8_9BACI Peptidyl-prolyl cis-trans isomerase OS=Bacillus sp. GeD10 GN=EBGED10_24230 PE=3 SV=1	N1LMF8		Peptidyl-prolyl cis-trans isomerase	>tr|N1LMF8|N1LMF8_9BACI Peptidyl-prolyl cis-trans isomerase OS=Bacillus sp. GeD10	EBGED10_24230
	N1LJC1		bged02414	3-ketoacyl-CoA thiolase @ Acetyl-CoA acetyltransferase	EBGED10_13620	K00632		-1.03404	2.47356	0.0033608		+	-1.46583	-1.12873	-0.941646	-0.596243	-0.736258	-2.11815	-2.72596	-1.58241	-1.85961	-1.75275	-0.973741	-2.00778	-1.03404	+	0	124.73	594590000	78	10	10	10	390	390	41.125	38.7	2.47356	1.03404	4.11641	N1LJC1	N1LJC1	>tr|N1LJC1|N1LJC1_9BACI 3-ketoacyl-CoA thiolase @ Acetyl-CoA acetyltransferase OS=Bacillus sp. GeD10 GN=EBGED10_13620 PE=3 SV=1	N1LJC1		3-ketoacyl-CoA thiolase @ Acetyl-CoA acetyltransferase	>tr|N1LJC1|N1LJC1_9BACI 3-ketoacyl-CoA thiolase @ Acetyl-CoA acetyltransferase OS=Bacillus sp. GeD10	EBGED10_13620
	N1LMV3		#N/A	Uncharacterized protein	EBGED10_13000	#N/A		-1.04273	2.43543	0.00366923		+	3.50067	4.59631	4.0617	4.34288	4.58617	3.08048	3.67053	3.33688	3.05269	2.73348	4.21754	3.17481	-1.04273	+	0	323.31	25616000000	349	9	9	9	146	146	16.196	63	2.43543	1.04273	4.05294	N1LMV3	N1LMV3	>tr|N1LMV3|N1LMV3_9BACI Uncharacterized protein OS=Bacillus sp. GeD10 GN=EBGED10_13000 PE=4 SV=1	N1LMV3		Uncharacterized protein	>tr|N1LMV3|N1LMV3_9BACI Uncharacterized protein OS=Bacillus sp. GeD10	EBGED10_13000
	N1LYX5		#N/A	Uncharacterized protein	EBGED10_52170	#N/A		-1.04965	1.6696	0.0213995		+	-2.64258	-1.52247	-1.89377	-2.30784	NaN	-3.81867	-3.47827	-2.3386	-3.12655	-2.94448	-2.09166	-3.14131	-1.04965	+	0	23.759	307950000	15	5	5	5	82	82	9.5899	80.5	1.6696	1.04965	2.95024	N1LYX5	N1LYX5	>tr|N1LYX5|N1LYX5_9BACI Uncharacterized protein OS=Bacillus sp. GeD10 GN=EBGED10_52170 PE=4 SV=1	N1LYX5		Uncharacterized protein	>tr|N1LYX5|N1LYX5_9BACI Uncharacterized protein OS=Bacillus sp. GeD10	EBGED10_52170
	N1LUQ6		bged01305	Ribosome-binding factor A	rbfA	K02834		-1.06222	2.45027	0.00354592		+	0.746493	0.852341	0.870461	0.985883	1.47569	-0.543311	-0.699423	0.157325	0.349747	0.355412	0.986174	-0.0760501	-1.06222	+	0	169.09	3321200000	79	7	7	7	118	118	13.482	47.5	2.45027	1.06222	4.0776	N1LUQ6	N1LUQ6	>tr|N1LUQ6|N1LUQ6_9BACI Ribosome-binding factor A OS=Bacillus sp. GeD10 GN=rbfA PE=3 SV=1	N1LUQ6		Ribosome-binding factor A	>tr|N1LUQ6|N1LUQ6_9BACI Ribosome-binding factor A OS=Bacillus sp. GeD10	rbfA
	N1LV73		#N/A	Uncharacterized protein	EBGED10_58650	#N/A		-1.07454	2.29739	0.00504204		+	-1.2036	-0.469172	-0.196625	-0.974782	-0.160421	-2.4008	-1.37107	-1.63973	-1.43309	-1.53262	-0.60092	-1.67546	-1.07454	+	0	18.815	986020000	34	6	6	6	97	97	11.079	88.7	2.29739	1.07454	3.82662	N1LV73	N1LV73	>tr|N1LV73|N1LV73_9BACI Uncharacterized protein OS=Bacillus sp. GeD10 GN=EBGED10_58650 PE=4 SV=1	N1LV73		Uncharacterized protein	>tr|N1LV73|N1LV73_9BACI Uncharacterized protein OS=Bacillus sp. GeD10	EBGED10_58650
	N1LQC7		bged00977	Cold shock protein CspA	EBGED10_41750	K03704		-1.08287	2.68629	0.00205927		+	6.97328	6.9914	6.65823	5.91373	6.25219	5.02997	5.59974	5.41397	5.6793	5.65149	6.55777	5.47489	-1.08287	+	0	323.31	116030000000	423	6	6	6	67	67	7.4612	71.6	2.68629	1.08287	4.47872	N1LQC7	N1LQC7	>tr|N1LQC7|N1LQC7_9BACI Cold shock protein CspA OS=Bacillus sp. GeD10 GN=EBGED10_41750 PE=4 SV=1	N1LQC7		Cold shock protein CspA	>tr|N1LQC7|N1LQC7_9BACI Cold shock protein CspA OS=Bacillus sp. GeD10	EBGED10_41750
	N1LRJ7		bged00443	30S ribosomal protein S5	rpsE	K02988		-1.08692	2.07396	0.00843412		+	5.65411	4.92486	5.80005	5.73968	5.67679	3.44503	5.03182	4.65064	4.57297	4.66045	5.5591	4.47218	-1.08692	+	0	323.31	56051000000	471	13	13	13	166	166	17.529	77.1	2.07396	1.08692	3.4707	N1LRJ7	N1LRJ7	>tr|N1LRJ7|N1LRJ7_9BACI 30S ribosomal protein S5 OS=Bacillus sp. GeD10 GN=rpsE PE=3 SV=1	N1LRJ7		30S ribosomal protein S5	>tr|N1LRJ7|N1LRJ7_9BACI 30S ribosomal protein S5 OS=Bacillus sp. GeD10	rpsE
	N1M184		bged01254	Transcriptional regulator, TetR family	EBGED10_58130	K18136		-1.09649	2.13909	0.00725949		+	NaN	NaN	NaN	-2.73051	-3.12296	NaN	-3.91456	-4.02098	-4.13414	NaN	-2.92673	-4.02323	-1.09649	+	0	33.042	142180000	11	6	6	6	188	188	21.633	42.6	2.13909	1.09649	6.5423	N1M184	N1M184	>tr|N1M184|N1M184_9BACI Transcriptional regulator, TetR family OS=Bacillus sp. GeD10 GN=EBGED10_58130 PE=4 SV=1	N1M184		Transcriptional regulator, TetR family	>tr|N1M184|N1M184_9BACI Transcriptional regulator, TetR family OS=Bacillus sp. GeD10	EBGED10_58130
	N1LHN4		#N/A	Conserved hypothetical conserved protein in Tn5401	EBGED10_15730	#N/A		-1.09994	2.00979	0.00977719		+	3.41892	4.60674	3.97986	3.95728	3.79262	3.02225	2.1492	2.85139	3.71979	2.5131	3.95108	2.85115	-1.09994	+	0	323.31	18510000000	161	10	10	10	85	85	9.991	78.8	2.00979	1.09994	3.37058	N1LHN4	N1LHN4	>tr|N1LHN4|N1LHN4_9BACI Conserved hypothetical conserved protein in Tn5401 OS=Bacillus sp. GeD10 GN=EBGED10_15730 PE=4 SV=1	N1LHN4		Conserved hypothetical conserved protein in Tn5401	>tr|N1LHN4|N1LHN4_9BACI Conserved hypothetical conserved protein in Tn5401 OS=Bacillus sp. GeD10	EBGED10_15730
	N1LL37		bged00362	Leucine-responsive regulatory protein, regulator for leucine (Or lrp) regulon and high-affinity branched-chain amino acid transport system	EBGED10_22230	K03719		-1.11383	1.69431	0.0202157		+	-2.66299	-2.88808	-2.83865	-3.00702	-2.68776	-5.1592	-3.50419	-3.70787	-3.35167	NaN	-2.8169	-3.93073	-1.11383	+	0	24.255	190210000	20	3	3	3	164	164	18.932	18.3	1.69431	1.11383	2.99037	N1LL37	N1LL37	>tr|N1LL37|N1LL37_9BACI Leucine-responsive regulatory protein, regulator for leucine (Or lrp) regulon and high-affinity branched-chain amino acid transport system OS=Bacillus sp. GeD10 GN=EBGED10_22230 PE=4 SV=1	N1LL37		Leucine-responsive regulatory protein, regulator for leucine (Or lrp) regulon and high-affinity branched-chain amino acid transport system	>tr|N1LL37|N1LL37_9BACI Leucine-responsive regulatory protein, regulator for leucine (Or lrp) regulon and high-affinity branched-chain amino acid transport system OS=Bacillus sp. GeD10	EBGED10_22230
	N1LXP6		bged02351	Uncharacterized protein	EBGED10_60850	#N/A		-1.11472	3.04399	0.000903662		+	-1.04565	-0.781055	-0.967479	-0.910973	-0.113603	-2.29774	-2.03651	-1.83326	-1.47671	-1.74813	-0.763753	-1.87847	-1.11472	+	0	89.015	961530000	29	3	3	3	113	113	13.191	31.9	3.04399	1.11472	5.12316	N1LXP6	N1LXP6	>tr|N1LXP6|N1LXP6_9BACI Uncharacterized protein OS=Bacillus sp. GeD10 GN=EBGED10_60850 PE=4 SV=1	N1LXP6		Uncharacterized protein	>tr|N1LXP6|N1LXP6_9BACI Uncharacterized protein OS=Bacillus sp. GeD10	EBGED10_60850
	N1LVX8		bged01156	UDP-N-acetylglucosamine--N-acetylmuramyl-(pentapeptide) pyrophosphoryl-undecaprenol N-acetylglucosamine transferase	murG	K02563		-1.11557	2.02949	0.00934361		+	-0.494433	-0.983165	-0.816685	0.0840688	-0.503573	-2.54111	-2.02069	-1.04669	-1.35611	-1.32704	-0.542758	-1.65833	-1.11557	+	0	59.332	837790000	46	12	12	12	389	389	42.731	48.1	2.02949	1.11557	3.40122	N1LVX8	N1LVX8	>tr|N1LVX8|N1LVX8_9BACI UDP-N-acetylglucosamine--N-acetylmuramyl-(pentapeptide) pyrophosphoryl-undecaprenol N-acetylglucosamine transferase OS=Bacillus sp. GeD10 GN=murG PE=3 SV=1	N1LVX8		UDP-N-acetylglucosamine--N-acetylmuramyl-(pentapeptide) pyrophosphoryl-undecaprenol N-acetylglucosamine transferase	>tr|N1LVX8|N1LVX8_9BACI UDP-N-acetylglucosamine--N-acetylmuramyl-(pentapeptide) pyrophosphoryl-undecaprenol N-acetylglucosamine transferase OS=Bacillus sp. GeD10	murG
	N1LQ46		bged02304	Chromosome (Plasmid) partitioning protein ParB / Stage 0 sporulation protein J	EBGED10_17760	K03497		-1.11665	1.68416	0.0206937		+	1.31082	2.53723	1.83681	2.37831	2.29349	-0.195776	0.762714	1.60797	1.29719	1.3013	2.07133	0.954681	-1.11665	+	0	323.31	5222300000	81	12	12	12	283	283	33.001	55.5	1.68416	1.11665	2.87424	N1LQ46	N1LQ46	>tr|N1LQ46|N1LQ46_9BACI Chromosome (Plasmid) partitioning protein ParB / Stage 0 sporulation protein J OS=Bacillus sp. GeD10 GN=EBGED10_17760 PE=4 SV=1	N1LQ46		Chromosome (Plasmid) partitioning protein ParB / Stage 0 sporulation protein J	>tr|N1LQ46|N1LQ46_9BACI Chromosome (Plasmid) partitioning protein ParB / Stage 0 sporulation protein J OS=Bacillus sp. GeD10	EBGED10_17760
	N1LUH0		bged00950	D-aminoacyl-tRNA deacylase	dtd	K07560		-1.11898	1.81868	0.0151818		+	-0.953162	-1.18936	-0.504691	-1.23428	-0.43675	-2.51366	-2.86233	-1.23439	-2.00269	-1.30004	-0.863649	-1.98262	-1.11898	+	0	27.552	667670000	23	4	4	4	146	146	16.34	28.1	1.81868	1.11897	3.07718	N1LUH0	N1LUH0	>tr|N1LUH0|N1LUH0_9BACI D-aminoacyl-tRNA deacylase OS=Bacillus sp. GeD10 GN=dtd PE=3 SV=1	N1LUH0		D-aminoacyl-tRNA deacylase	>tr|N1LUH0|N1LUH0_9BACI D-aminoacyl-tRNA deacylase OS=Bacillus sp. GeD10	dtd
	N1LRE3		bged01829	2-C-methyl-D-erythritol 2,4-cyclodiphosphate synthase	ispF	K01770		-1.12138	1.78681	0.0163377		+	1.36272	2.52613	2.72551	2.78833	2.66372	1.77701	0.328871	1.25497	1.66655	1.43212	2.41328	1.2919	-1.12138	+	0	323.31	7849900000	180	12	12	12	158	158	17.219	83.5	1.78681	1.12138	3.02886	N1LRE3	N1LRE3	>tr|N1LRE3|N1LRE3_9BACI 2-C-methyl-D-erythritol 2,4-cyclodiphosphate synthase OS=Bacillus sp. GeD10 GN=ispF PE=3 SV=1	N1LRE3		2-C-methyl-D-erythritol 2,4-cyclodiphosphate synthase	>tr|N1LRE3|N1LRE3_9BACI 2-C-methyl-D-erythritol 2,4-cyclodiphosphate synthase OS=Bacillus sp. GeD10	ispF
	N1LWX1		bged00634	Hypoxanthine-guanine phosphoribosyltransferase	EBGED10_58240	K00760		-1.12686	4.03944	9.13178e-05		+	2.69139	2.32423	2.65316	2.45829	3.01634	1.31086	1.81064	1.49594	1.63755	1.25412	2.62868	1.50182	-1.12686	+	0	231.07	7249300000	253	13	13	13	175	175	19.791	85.1	4.03944	1.12686	7.21263	N1LWX1	N1LWX1	>tr|N1LWX1|N1LWX1_9BACI Hypoxanthine-guanine phosphoribosyltransferase OS=Bacillus sp. GeD10 GN=EBGED10_58240 PE=4 SV=1	N1LWX1		Hypoxanthine-guanine phosphoribosyltransferase	>tr|N1LWX1|N1LWX1_9BACI Hypoxanthine-guanine phosphoribosyltransferase OS=Bacillus sp. GeD10	EBGED10_58240
	N1LXI4		#N/A	Endo/excinuclease amino terminal domain protein	EBGED10_61820	K03703		-1.12721	4.00426	9.90235e-05		+	3.62494	3.53496	3.66645	3.32648	3.80645	2.70221	2.23519	2.43518	2.83818	2.11247	3.59186	2.46465	-1.12721	+	0	323.31	15152000000	245	10	10	10	124	124	14.784	74.2	4.00426	1.12721	7.12997	N1LXI4	N1LXI4	>tr|N1LXI4|N1LXI4_9BACI Endo/excinuclease amino terminal domain protein OS=Bacillus sp. GeD10 GN=EBGED10_61820 PE=4 SV=1	N1LXI4		Endo/excinuclease amino terminal domain protein	>tr|N1LXI4|N1LXI4_9BACI Endo/excinuclease amino terminal domain protein OS=Bacillus sp. GeD10	EBGED10_61820
	N1LWZ4		bged01242	Regulatory protein Spx	spxA	K16509		-1.14847	2.19883	0.00632665		+	-0.120294	0.0903872	1.00316	-0.230465	0.869883	-1.45573	-0.722918	-0.814709	-0.342723	-0.793581	0.322535	-0.825931	-1.14847	+	0	194.41	1797500000	50	8	8	8	131	131	15.593	63.4	2.19883	1.14847	3.66812	N1LWZ4	N1LWZ4	>tr|N1LWZ4|N1LWZ4_9BACI Regulatory protein Spx OS=Bacillus sp. GeD10 GN=spxA PE=3 SV=1	N1LWZ4		Regulatory protein Spx	>tr|N1LWZ4|N1LWZ4_9BACI Regulatory protein Spx OS=Bacillus sp. GeD10	spxA
	N1LJT4		bged00004	30S ribosomal protein S10	rpsJ	K02946		-1.15222	2.47999	0.00331138		+	5.91183	5.74432	5.24083	4.80962	5.26781	3.52672	4.44234	4.39254	4.15658	4.69516	5.39488	4.24267	-1.15222	+	0	115.38	62303000000	481	9	9	9	102	102	11.684	65.7	2.47999	1.15222	4.12716	N1LJT4	N1LJT4	>tr|N1LJT4|N1LJT4_9BACI 30S ribosomal protein S10 OS=Bacillus sp. GeD10 GN=rpsJ PE=3 SV=1	N1LJT4		30S ribosomal protein S10	>tr|N1LJT4|N1LJT4_9BACI 30S ribosomal protein S10 OS=Bacillus sp. GeD10	rpsJ
	N1LUE0		bged03421	Ribosomal subunit interface protein	EBGED10_49640	K05808		-1.15562	1.87767	0.0132534		+	7.44604	6.80061	6.11542	6.02436	6.78133	4.83931	5.31919	5.17313	6.3291	5.72891	6.63355	5.47793	-1.15562	+	0	323.31	124640000000	569	16	16	16	180	180	21.096	81.7	1.87767	1.15562	3.16705	N1LUE0	N1LUE0	>tr|N1LUE0|N1LUE0_9BACI Ribosomal subunit interface protein OS=Bacillus sp. GeD10 GN=EBGED10_49640 PE=4 SV=1	N1LUE0		Ribosomal subunit interface protein	>tr|N1LUE0|N1LUE0_9BACI Ribosomal subunit interface protein OS=Bacillus sp. GeD10	EBGED10_49640
	N1LFN6		bged01650	2-amino-4-hydroxy-6-hydroxymethyldihydropteridine pyrophosphokinase	EBGED10_3140	K00950		-1.16304	1.8315	0.0147401		+	-1.16567	-1.20375	-0.327009	-0.796954	-0.139169	-2.56424	-1.57515	-2.10477	-0.851779	-2.35182	-0.726511	-1.88955	-1.16304	+	0	128.03	838100000	30	6	6	6	171	171	19.88	46.8	1.8315	1.16304	3.09666	N1LFN6	N1LFN6	>tr|N1LFN6|N1LFN6_9BACI 2-amino-4-hydroxy-6-hydroxymethyldihydropteridine pyrophosphokinase OS=Bacillus sp. GeD10 GN=EBGED10_3140 PE=4 SV=1	N1LFN6		2-amino-4-hydroxy-6-hydroxymethyldihydropteridine pyrophosphokinase	>tr|N1LFN6|N1LFN6_9BACI 2-amino-4-hydroxy-6-hydroxymethyldihydropteridine pyrophosphokinase OS=Bacillus sp. GeD10	EBGED10_3140
	N1LJJ8		bged01837	NifU-like domain protein	EBGED10_14170	K04567		-1.16748	2.92456	0.00118972		+	4.2447	5.11571	5.17652	4.06155	4.84544	3.73368	3.53037	3.30032	3.56995	3.4722	4.68879	3.5213	-1.16748	+	0	98.09	29982000000	160	6	6	6	78	78	8.6049	91	2.92456	1.16748	4.90269	N1LJJ8	N1LJJ8	>tr|N1LJJ8|N1LJJ8_9BACI NifU-like domain protein OS=Bacillus sp. GeD10 GN=EBGED10_14170 PE=4 SV=1	N1LJJ8		NifU-like domain protein	>tr|N1LJJ8|N1LJJ8_9BACI NifU-like domain protein OS=Bacillus sp. GeD10	EBGED10_14170
	N1LFQ2		bged02712	OsmC/Ohr family protein	EBGED10_9520	K07397		-1.16962	3.31634	0.000482684		+	-1.51713	-1.26041	-1.10065	-1.18882	-0.602882	-2.58576	-2.52806	-1.86748	-2.47585	-2.06085	-1.13398	-2.3036	-1.16962	+	0	66.508	530860000	28	8	8	8	125	125	13.976	80.8	3.31634	1.16962	5.64775	N1LFQ2	N1LFQ2	>tr|N1LFQ2|N1LFQ2_9BACI OsmC/Ohr family protein OS=Bacillus sp. GeD10 GN=EBGED10_9520 PE=4 SV=1	N1LFQ2		OsmC/Ohr family protein	>tr|N1LFQ2|N1LFQ2_9BACI OsmC/Ohr family protein OS=Bacillus sp. GeD10	EBGED10_9520
	N1LQQ8		#N/A	Uncharacterized protein YpbS	EBGED10_37960	#N/A		-1.19165	4.43489	3.67373e-05		+	-0.113302	-0.138179	-0.198298	-0.509777	0.305931	-1.30064	-1.46354	-1.08775	-1.35133	-1.40861	-0.130725	-1.32238	-1.19165	+	0	137	1180900000	49	5	5	5	90	90	10.032	55.6	4.43489	1.19165	8.19394	N1LQQ8	N1LQQ8	>tr|N1LQQ8|N1LQQ8_9BACI Uncharacterized protein YpbS OS=Bacillus sp. GeD10 GN=EBGED10_37960 PE=4 SV=1	N1LQQ8		Uncharacterized protein YpbS	>tr|N1LQQ8|N1LQQ8_9BACI Uncharacterized protein YpbS OS=Bacillus sp. GeD10	EBGED10_37960
	N1LRI0		bged02243	50S ribosomal protein L23	rplW	K02892		-1.19423	3.51002	0.000309014		+	5.44838	4.95549	5.10501	4.50776	5.25876	3.65213	3.64327	3.73207	4.21565	4.06115	5.05508	3.86085	-1.19423	+	0	157.04	40326000000	460	10	10	10	96	96	11.114	62.5	3.51002	1.19423	6.04091	N1LRI0	N1LRI0	>tr|N1LRI0|N1LRI0_9BACI 50S ribosomal protein L23 OS=Bacillus sp. GeD10 GN=rplW PE=3 SV=1	N1LRI0		50S ribosomal protein L23	>tr|N1LRI0|N1LRI0_9BACI 50S ribosomal protein L23 OS=Bacillus sp. GeD10	rplW
	N1LYC8		bged00946	Cold shock protein CspC	EBGED10_49620	K03704		-1.19698	2.60851	0.00246312		+	NaN	-0.987089	NaN	NaN	-1.11031	-2.73703	-2.18756	-2.05024	-2.0778	-2.17575	-1.0487	-2.24568	-1.19698	+	0	61.973	650850000	29	2	2	2	65	65	7.305	66.2	2.60851	1.19698	5.62308	N1LYC8	N1LYC8	>tr|N1LYC8|N1LYC8_9BACI Cold shock protein CspC OS=Bacillus sp. GeD10 GN=EBGED10_49620 PE=4 SV=1	N1LYC8		Cold shock protein CspC	>tr|N1LYC8|N1LYC8_9BACI Cold shock protein CspC OS=Bacillus sp. GeD10	EBGED10_49620
	N1LLA0		bged00439	50S ribosomal protein L22	rplV	K02890		-1.20352	2.26499	0.00543267		+	6.04066	5.71467	5.33038	4.91163	5.27704	3.86808	3.69697	4.55604	4.05145	5.08426	5.45488	4.25136	-1.20352	+	0	323.31	64778000000	788	11	11	11	113	113	12.536	69	2.26499	1.20352	3.77424	N1LLA0	N1LLA0	>tr|N1LLA0|N1LLA0_9BACI 50S ribosomal protein L22 OS=Bacillus sp. GeD10 GN=rplV PE=3 SV=1	N1LLA0		50S ribosomal protein L22	>tr|N1LLA0|N1LLA0_9BACI 50S ribosomal protein L22 OS=Bacillus sp. GeD10	rplV
	N1LRF8		bged00445	50S ribosomal protein L11	rplK	K02867		-1.22659	2.78614	0.0016363		+	7.32249	7.34355	7.18934	7.28202	7.13154	5.06572	6.41783	6.48385	6.26391	5.90465	7.25379	6.02719	-1.22659	+	0	305.43	186080000000	477	9	9	9	141	141	14.975	56	2.78614	1.22659	4.65393	N1LRF8	N1LRF8	>tr|N1LRF8|N1LRF8_9BACI 50S ribosomal protein L11 OS=Bacillus sp. GeD10 GN=rplK PE=3 SV=1	N1LRF8		50S ribosomal protein L11	>tr|N1LRF8|N1LRF8_9BACI 50S ribosomal protein L11 OS=Bacillus sp. GeD10	rplK
	N1LHG1		bged03389	Negative regulation of the defective prophage PBSX genes	EBGED10_6950	K01356		-1.23628	3.57299	0.000267306		+	1.69497	2.21111	2.47065	2.09586	2.62464	0.811328	0.90206	1.11446	1.37853	0.70944	2.21945	0.983165	-1.23628	+	0	127.29	5126900000	72	6	6	6	114	114	13.198	78.1	3.57299	1.23628	6.17259	N1LHG1	N1LHG1	>tr|N1LHG1|N1LHG1_9BACI Negative regulation of the defective prophage PBSX genes OS=Bacillus sp. GeD10 GN=EBGED10_6950 PE=4 SV=1	N1LHG1		Negative regulation of the defective prophage PBSX genes	>tr|N1LHG1|N1LHG1_9BACI Negative regulation of the defective prophage PBSX genes OS=Bacillus sp. GeD10	EBGED10_6950
	N1LV76		bged02020	DNA-binding protein HBsu	EBGED10_38670	K03530		-1.23668	2.78476	0.00164151		+	7.00017	7.80084	6.80595	6.99579	7.20211	6.28089	5.21293	5.95482	5.82498	6.34786	7.16097	5.9243	-1.23668	+	0	323.31	176200000000	727	14	14	14	90	90	9.6419	86.7	2.78476	1.23668	4.65149	N1LV76	N1LV76	>tr|N1LV76|N1LV76_9BACI DNA-binding protein HBsu OS=Bacillus sp. GeD10 GN=EBGED10_38670 PE=3 SV=1	N1LV76		DNA-binding protein HBsu	>tr|N1LV76|N1LV76_9BACI DNA-binding protein HBsu OS=Bacillus sp. GeD10	EBGED10_38670
	N1LN26		#N/A	Uncharacterized protein	EBGED10_10900	#N/A		-1.23788	1.55402	0.0279242		+	-3.24748	-2.97307	-2.63645	-3.00243	-2.33196	-5.63366	-4.19372	-3.42595	-3.99363	-3.13384	-2.83828	-4.07616	-1.23788	+	0	21.001	213730000	18	4	4	4	103	103	12.109	52.4	1.55402	1.23788	2.68004	N1LN26	N1LN26	>tr|N1LN26|N1LN26_9BACI Uncharacterized protein OS=Bacillus sp. GeD10 GN=EBGED10_10900 PE=4 SV=1	N1LN26		Uncharacterized protein	>tr|N1LN26|N1LN26_9BACI Uncharacterized protein OS=Bacillus sp. GeD10	EBGED10_10900
	N1LJV1		bged00452	30S ribosomal protein S8	rpsH	K02994		-1.25016	2.38255	0.00414427		+	6.08396	6.16383	6.11939	5.81575	6.30886	3.95477	4.58162	5.59291	4.63844	5.47323	6.09836	4.84819	-1.25016	+	0	323.31	89852000000	669	13	13	14	132	132	14.882	79.5	2.38255	1.25016	3.96562	N1LJV1	N1LJV1	>tr|N1LJV1|N1LJV1_9BACI 30S ribosomal protein S8 OS=Bacillus sp. GeD10 GN=rpsH PE=3 SV=1	N1LJV1		30S ribosomal protein S8	>tr|N1LJV1|N1LJV1_9BACI 30S ribosomal protein S8 OS=Bacillus sp. GeD10	rpsH
	N1LML2		#N/A	Uncharacterized protein	EBGED10_8890	#N/A		-1.26518	2.01025	0.00976678		+	-3.29539	-2.78015	-2.215	NaN	-2.13387	-4.78852	-3.58348	-3.46171	-3.67322	-3.84945	-2.6061	-3.87128	-1.26518	+	0.00048876	3.2579	197060000	17	2	2	2	73	73	8.9476	16.4	2.01025	1.26518	3.51701	N1LML2	N1LML2	>tr|N1LML2|N1LML2_9BACI Uncharacterized protein OS=Bacillus sp. GeD10 GN=EBGED10_8890 PE=4 SV=1	N1LML2		Uncharacterized protein	>tr|N1LML2|N1LML2_9BACI Uncharacterized protein OS=Bacillus sp. GeD10	EBGED10_8890
	N1LVS5		bged01391	Trk system potassium uptake protein TrkA	EBGED10_55360	K03499		-1.2691	4.23846	5.77486e-05		+	0.818842	1.0391	1.37711	1.32586	1.70949	-0.230422	-0.0125486	0.140355	0.0792911	-0.0517879	1.25408	-0.0150225	-1.2691	+	0	232.66	2452300000	81	9	9	9	221	221	24.386	48.9	4.23846	1.2691	7.69417	N1LVS5	N1LVS5	>tr|N1LVS5|N1LVS5_9BACI Trk system potassium uptake protein TrkA OS=Bacillus sp. GeD10 GN=EBGED10_55360 PE=4 SV=1	N1LVS5		Trk system potassium uptake protein TrkA	>tr|N1LVS5|N1LVS5_9BACI Trk system potassium uptake protein TrkA OS=Bacillus sp. GeD10	EBGED10_55360
	N1LJV7		bged00448	50S ribosomal protein L15	rplO	K02876		-1.26949	4.23054	5.88117e-05		+	6.42179	6.93491	7.09953	6.54861	6.92947	5.87086	5.42942	5.51291	5.5456	5.22808	6.78686	5.51737	-1.26949	+	0	323.31	131160000000	695	15	15	15	146	146	15.478	63.7	4.23054	1.26949	7.67453	N1LJV7	N1LJV7	>tr|N1LJV7|N1LJV7_9BACI 50S ribosomal protein L15 OS=Bacillus sp. GeD10 GN=rplO PE=3 SV=1	N1LJV7		50S ribosomal protein L15	>tr|N1LJV7|N1LJV7_9BACI 50S ribosomal protein L15 OS=Bacillus sp. GeD10	rplO
	N1LH85		#N/A	PhaP protein	EBGED10_8520	#N/A		-1.27767	3.69124	0.00020359		+	3.66307	3.58003	4.09084	3.43238	3.56859	2.31799	2.91799	2.53788	1.93037	2.24235	3.66698	2.38932	-1.27767	+	0	284.69	15510000000	84	12	12	12	174	174	20.339	75.3	3.69124	1.27767	6.42524	N1LH85	N1LH85	>tr|N1LH85|N1LH85_9BACI PhaP protein OS=Bacillus sp. GeD10 GN=EBGED10_8520 PE=4 SV=1	N1LH85		PhaP protein	>tr|N1LH85|N1LH85_9BACI PhaP protein OS=Bacillus sp. GeD10	EBGED10_8520
	N1LP36		#N/A	Uncharacterized protein	EBGED10_32360	#N/A		-1.3089	1.78312	0.0164771		+	-2.04424	-1.79805	-1.66205	-1.95275	-1.14815	-4.55637	-3.10781	-2.29964	-2.5634	-2.62253	-1.72105	-3.02995	-1.3089	+	0	68.994	400280000	26	7	7	7	150	150	17.656	58.7	1.78312	1.3089	3.02328	N1LP36	N1LP36	>tr|N1LP36|N1LP36_9BACI Uncharacterized protein OS=Bacillus sp. GeD10 GN=EBGED10_32360 PE=4 SV=1	N1LP36		Uncharacterized protein	>tr|N1LP36|N1LP36_9BACI Uncharacterized protein OS=Bacillus sp. GeD10	EBGED10_32360
	N1LMH1		#N/A	Polyhydroxyalkanoate synthesis repressor PhaR	EBGED10_8540	#N/A		-1.33137	1.63867	0.022979		+	NaN	-2.05344	NaN	-2.35437	NaN	NaN	-3.92592	-3.15405	NaN	-3.52585	-2.2039	-3.53527	-1.33137	+	0	44.705	205220000	17	6	6	6	160	160	18.495	47.5	1.63867	1.33137	4.31131	N1LMH1	N1LMH1	>tr|N1LMH1|N1LMH1_9BACI Polyhydroxyalkanoate synthesis repressor PhaR OS=Bacillus sp. GeD10 GN=EBGED10_8540 PE=4 SV=1	N1LMH1		Polyhydroxyalkanoate synthesis repressor PhaR	>tr|N1LMH1|N1LMH1_9BACI Polyhydroxyalkanoate synthesis repressor PhaR OS=Bacillus sp. GeD10	EBGED10_8540
	N1LKN2		#N/A	Uncharacterized protein	EBGED10_18010	#N/A		-1.36134	3.10178	0.000791079		+	0.137468	0.855227	0.675047	0.244208	1.02575	-1.33952	-0.385822	-0.765122	-0.316856	-1.06168	0.58754	-0.7738	-1.36134	+	0	237.4	2077900000	38	2	2	4	95	95	11.1	44.2	3.10178	1.36134	5.23186	N1LKN2	N1LKN2	>tr|N1LKN2|N1LKN2_9BACI Uncharacterized protein OS=Bacillus sp. GeD10 GN=EBGED10_18010 PE=4 SV=1	N1LKN2		Uncharacterized protein	>tr|N1LKN2|N1LKN2_9BACI Uncharacterized protein OS=Bacillus sp. GeD10	EBGED10_18010
	N1LHT0		bged00127	Orotate phosphoribosyltransferase	pyrE	K00762		-1.36627	3.40892	0.000390017		+	1.13033	1.09037	1.76788	1.19648	1.31882	-0.642129	0.334678	0.0285477	0.356177	-0.404759	1.30078	-0.0654971	-1.36627	+	0	146.86	2915000000	88	8	8	8	180	180	19.935	45	3.40892	1.36627	5.83348	N1LHT0	N1LHT0	>tr|N1LHT0|N1LHT0_9BACI Orotate phosphoribosyltransferase OS=Bacillus sp. GeD10 GN=pyrE PE=3 SV=1	N1LHT0		Orotate phosphoribosyltransferase	>tr|N1LHT0|N1LHT0_9BACI Orotate phosphoribosyltransferase OS=Bacillus sp. GeD10	pyrE
	N1LG39		bged02653	Pyruvate formate-lyase-activating enzyme	EBGED10_4310	K04069		-1.41637	2.39969	0.00398392		+	0.527993	0.718481	0.446347	0.962598	0.603243	-2.12975	-0.526344	-0.414853	-0.44639	-0.305839	0.651733	-0.764634	-1.41637	+	0	323.31	1697300000	128	12	12	12	243	243	27.37	56.8	2.39969	1.41637	3.99383	N1LG39	N1LG39	>tr|N1LG39|N1LG39_9BACI Pyruvate formate-lyase-activating enzyme OS=Bacillus sp. GeD10 GN=EBGED10_4310 PE=3 SV=1	N1LG39		Pyruvate formate-lyase-activating enzyme	>tr|N1LG39|N1LG39_9BACI Pyruvate formate-lyase-activating enzyme OS=Bacillus sp. GeD10	EBGED10_4310
	N1M0T9		bged00948	Cold shock protein CspB	EBGED10_58620	K03704		-1.43837	3.61322	0.000243659		+	4.83626	4.97818	4.0831	4.01664	4.23076	3.21689	2.79488	3.06785	2.65483	3.21862	4.42899	2.99062	-1.43837	+	0	323.31	28201000000	778	5	5	7	65	65	7.1819	93.8	3.61322	1.43837	6.25774	N1M0T9	N1M0T9	>tr|N1M0T9|N1M0T9_9BACI Cold shock protein CspB OS=Bacillus sp. GeD10 GN=EBGED10_58620 PE=4 SV=1	N1M0T9		Cold shock protein CspB	>tr|N1M0T9|N1M0T9_9BACI Cold shock protein CspB OS=Bacillus sp. GeD10	EBGED10_58620
	N1LHQ0		bged03390	Uncharacterized protein	EBGED10_15930	#N/A		-1.52209	2.06659	0.00857842		+	0.986779	1.24288	2.61977	2.21391	2.76105	1.44131	0.113197	0.123327	0.287567	0.248546	1.96488	0.442789	-1.52209	+	0	226.67	4363600000	58	8	8	8	165	165	18.874	60.6	2.06659	1.52209	3.45916	N1LHQ0	N1LHQ0	>tr|N1LHQ0|N1LHQ0_9BACI Uncharacterized protein OS=Bacillus sp. GeD10 GN=EBGED10_15930 PE=4 SV=1	N1LHQ0		Uncharacterized protein	>tr|N1LHQ0|N1LHQ0_9BACI Uncharacterized protein OS=Bacillus sp. GeD10	EBGED10_15930
	N1M0F1		bged03386	Transcriptional regulator in cluster with unspecified monosaccharide ABC transport system	EBGED10_57320	K15539		-1.62032	1.55601	0.0277968		+	NaN	-0.0443733	-0.68125	0.0528879	-0.816011	-3.26545	-2.97975	-1.30815	-1.67728	-0.731899	-0.372187	-1.99251	-1.62032	+	0	114.3	566090000	43	7	7	7	308	308	34.216	34.1	1.55601	1.62032	2.76743	N1M0F1	N1M0F1	>tr|N1M0F1|N1M0F1_9BACI Transcriptional regulator in cluster with unspecified monosaccharide ABC transport system OS=Bacillus sp. GeD10 GN=EBGED10_57320 PE=4 SV=1	N1M0F1		Transcriptional regulator in cluster with unspecified monosaccharide ABC transport system	>tr|N1M0F1|N1M0F1_9BACI Transcriptional regulator in cluster with unspecified monosaccharide ABC transport system OS=Bacillus sp. GeD10	EBGED10_57320
	N1LMT3		bged00294	MdtR transcriptional regulator, MarR family	EBGED10_9650	K15973		-1.66507	2.67938	0.0020923		+	-1.4818	-0.604928	-0.156454	-0.188563	-0.0267176	-2.64942	-2.01954	-1.22604	-2.63454	-2.25427	-0.491693	-2.15676	-1.66507	+	0	47.456	899090000	49	7	7	7	152	152	17.704	47.4	2.67938	1.66507	4.46673	N1LMT3	N1LMT3	>tr|N1LMT3|N1LMT3_9BACI MdtR transcriptional regulator, MarR family OS=Bacillus sp. GeD10 GN=EBGED10_9650 PE=4 SV=1	N1LMT3		MdtR transcriptional regulator, MarR family	>tr|N1LMT3|N1LMT3_9BACI MdtR transcriptional regulator, MarR family OS=Bacillus sp. GeD10	EBGED10_9650
	N1LVZ1		#N/A	UPF0354 protein EBGED10	EBGED10_41620	#N/A		-1.67206	3.12928	0.000742533		+	2.10133	1.70118	1.77669	2.30985	NaN	-0.351427	0.318354	0.968211	-0.0553437	0.621194	1.97226	0.300198	-1.67206	+	0	215.06	3445000000	23	10	10	10	277	277	31.914	44	3.12928	1.67206	5.6906	N1LVZ1	N1LVZ1	>tr|N1LVZ1|N1LVZ1_9BACI UPF0354 protein EBGED10_41620 OS=Bacillus sp. GeD10 GN=EBGED10_41620 PE=3 SV=1	N1LVZ1		UPF0354 protein EBGED10	>tr|N1LVZ1|N1LVZ1_9BACI UPF0354 protein EBGED10_41620 OS=Bacillus sp. GeD10	EBGED10_41620
	N1LV46		bged00169	Probable septum site-determining protein MinC	minC	K03610		-1.84481	1.67322	0.0212217		+	0.506961	NaN	-0.520972	NaN	NaN	-2.75813	-2.1732	-1.04798	-1.52008	-1.75967	-0.00700535	-1.85181	-1.84481	+	0	52.672	316500000	27	6	6	6	228	228	25.173	44.3	1.67322	1.84481	3.3108	N1LV46	N1LV46	>tr|N1LV46|N1LV46_9BACI Probable septum site-determining protein MinC OS=Bacillus sp. GeD10 GN=minC PE=3 SV=1	N1LV46		Probable septum site-determining protein MinC	>tr|N1LV46|N1LV46_9BACI Probable septum site-determining protein MinC OS=Bacillus sp. GeD10	minC
	N1LKJ4		#N/A	Uncharacterized protein	EBGED10_4570	#N/A		-1.96975	2.97312	0.00106385		+	-0.0163084	0.90285	0.54307	1.16427	0.479765	-1.37271	-1.49068	-0.897067	-2.51553	-0.49914	0.61473	-1.35502	-1.96975	+	0	114.2	1697700000	52	3	3	3	60	60	7.1441	78.3	2.97312	1.96975	4.99166	N1LKJ4	N1LKJ4	>tr|N1LKJ4|N1LKJ4_9BACI Uncharacterized protein OS=Bacillus sp. GeD10 GN=EBGED10_4570 PE=4 SV=1	N1LKJ4		Uncharacterized protein	>tr|N1LKJ4|N1LKJ4_9BACI Uncharacterized protein OS=Bacillus sp. GeD10	EBGED10_4570
	N1LH86		#N/A	Uncharacterized protein	EBGED10_14030	#N/A		-2.22042	4.67998	2.08942e-05		+	2.1601	2.42235	3.18635	2.44419	3.30047	0.406493	0.348112	0.694215	0.762379	0.200148	2.70269	0.482269	-2.22042	+	0	61.966	5063400000	78	5	5	5	88	88	10.403	75	4.67998	2.22042	8.85408	N1LH86	N1LH86	>tr|N1LH86|N1LH86_9BACI Uncharacterized protein OS=Bacillus sp. GeD10 GN=EBGED10_14030 PE=4 SV=1	N1LH86		Uncharacterized protein	>tr|N1LH86|N1LH86_9BACI Uncharacterized protein OS=Bacillus sp. GeD10	EBGED10_14030
	N1LPK1		bged01283	Transcriptional regulator, MerR family	EBGED10_18740	K03713		-2.44558	1.85232	0.0140501		+	-1.68852	-1.04928	0.545498	-1.75228	-0.488559	-1.47392	-3.60756	-2.24662	-5.07028	-4.26266	-0.886629	-3.33221	-2.44558	+	0	88.821	872080000	66	7	7	7	129	129	15.173	45.7	1.85232	2.44558	3.12836	N1LPK1	N1LPK1	>tr|N1LPK1|N1LPK1_9BACI Transcriptional regulator, MerR family OS=Bacillus sp. GeD10 GN=EBGED10_18740 PE=4 SV=1	N1LPK1		Transcriptional regulator, MerR family	>tr|N1LPK1|N1LPK1_9BACI Transcriptional regulator, MerR family OS=Bacillus sp. GeD10	EBGED10_18740
	N1LM18		bged00853	ABC transporter membrane-spanning permease-glutamine transport	EBGED10_25150	K02029		-2.56807	3.13852	0.000726911		+	NaN	-1.60269	-0.808586	-0.619617	-0.455835	NaN	-3.30827	-3.85381	-3.15719	NaN	-0.871681	-3.43976	-2.56807	+	0	15.844	410110000	16	3	3	3	219	219	23.773	25.1	3.13852	2.56807	7.36056	N1LM18	N1LM18	>tr|N1LM18|N1LM18_9BACI ABC transporter membrane-spanning permease-glutamine transport OS=Bacillus sp. GeD10 GN=EBGED10_25150 PE=3 SV=1	N1LM18		ABC transporter membrane-spanning permease-glutamine transport	>tr|N1LM18|N1LM18_9BACI ABC transporter membrane-spanning permease-glutamine transport OS=Bacillus sp. GeD10	EBGED10_25150
	N1LTN7		bged01544	Respiratory nitrate reductase delta chain	EBGED10_30430	K00373		-2.75766	3.51716	0.000303976		+	-0.818444	-1.18009	-0.513445	-0.52928	-0.0574338	NaN	NaN	-3.41132	NaN	-3.34349	-0.61974	-3.3774	-2.75766	+	0	39.002	490870000	33	9	9	9	177	177	20.398	64.4	3.51716	2.75766	8.86333	N1LTN7	N1LTN7	>tr|N1LTN7|N1LTN7_9BACI Respiratory nitrate reductase delta chain OS=Bacillus sp. GeD10 GN=EBGED10_30430 PE=4 SV=1	N1LTN7		Respiratory nitrate reductase delta chain	>tr|N1LTN7|N1LTN7_9BACI Respiratory nitrate reductase delta chain OS=Bacillus sp. GeD10	EBGED10_30430
#N/A	N1LQP1		bged00458	50S ribosomal protein L24	rplX	K02895		-0.918147	1.48898	0.0324353		0	6.38273	6.24962	6.30116	5.6108	5.91697	4.93671	4.02688	5.53653	5.47995	5.89048	6.09226	5.17411	-0.918147		0	323.31	109810000000	404	17	17	17	103	103	11.228	85.4	1.48898	0.918147	2.58358	N1LQP1	N1LQP1	>tr|N1LQP1|N1LQP1_9BACI 50S ribosomal protein L24 OS=Bacillus sp. GeD10 GN=rplX PE=3 SV=1	N1LQP1		50S ribosomal protein L24	>tr|N1LQP1|N1LQP1_9BACI 50S ribosomal protein L24 OS=Bacillus sp. GeD10	rplX
#N/A	N1LTW4		bged00009	Probable tRNA sulfurtransferase	thiI	K03151		0.275098	1.48325	0.0328659		0	1.68688	1.64762	2.06428	2.10657	1.85231	2.26408	2.03775	2.03112	2.2573	2.14289	1.87153	2.14663	0.275098		0	159.17	4566900000	171	18	18	18	404	404	45.852	70	1.48325	-0.275098	-2.5751	N1LTW4	N1LTW4	>tr|N1LTW4|N1LTW4_9BACI Probable tRNA sulfurtransferase OS=Bacillus sp. GeD10 GN=thiI PE=3 SV=1	N1LTW4		Probable tRNA sulfurtransferase	>tr|N1LTW4|N1LTW4_9BACI Probable tRNA sulfurtransferase OS=Bacillus sp. GeD10	thiI
#N/A	N1LF51		#N/A	Glyoxalase family protein	EBGED10_7860	K01759		-0.760226	1.48089	0.0330454		0	-1.85363	-1.77751	-2.26643	-2.3158	-1.56704	-3.4573	-3.20461	-2.15702	-2.33851	-2.42411	-1.95608	-2.71631	-0.760226		0	123.55	489490000	26	4	4	4	126	126	14.374	38.9	1.48089	0.760226	2.5716	N1LF51	N1LF51	>tr|N1LF51|N1LF51_9BACI Glyoxalase family protein OS=Bacillus sp. GeD10 GN=EBGED10_7860 PE=4 SV=1	N1LF51		Glyoxalase family protein	>tr|N1LF51|N1LF51_9BACI Glyoxalase family protein OS=Bacillus sp. GeD10	EBGED10_7860
#N/A	N1LMP0		bged03254	Hydrolase (HAD superfamily)	EBGED10_32250	K07023		0.972613	1.48003	0.0331109		0	-3.68205	-2.59085	-4.14392	-2.69443	-3.84224	NaN	-2.28077	-2.29027	-2.7088	-2.39249	-3.3907	-2.41809	0.972613		0	26.761	266350000	22	8	8	8	200	200	23.081	50	1.48003	-0.972613	-2.64647	N1LMP0	N1LMP0	>tr|N1LMP0|N1LMP0_9BACI Hydrolase (HAD superfamily) OS=Bacillus sp. GeD10 GN=EBGED10_32250 PE=4 SV=1	N1LMP0		Hydrolase (HAD superfamily)	>tr|N1LMP0|N1LMP0_9BACI Hydrolase (HAD superfamily) OS=Bacillus sp. GeD10	EBGED10_32250
#N/A	N1LH75		bged02679	Lactate utilization protein A	lutA	K18928		1.18806	1.47455	0.0335313		0	-0.841922	-1.48372	-1.1345	-1.46923	NaN	-1.38609	0.0246938	0.953344	-0.040808	0.22743	-1.23234	-0.044286	1.18806		0	97.684	2027100000	81	8	8	8	239	239	26.217	53.1	1.47455	-1.18806	-2.63778	N1LH75	N1LH75	>tr|N1LH75|N1LH75_9BACI Lactate utilization protein A OS=Bacillus sp. GeD10 GN=lutA PE=3 SV=1	N1LH75		Lactate utilization protein A	>tr|N1LH75|N1LH75_9BACI Lactate utilization protein A OS=Bacillus sp. GeD10	lutA
#N/A	N1LHD6		bged02339	DNA polymerase III subunits gamma and tau	EBGED10_8920	K02343		1.28327	1.46224	0.0344952		0	-1.57595	-0.777066	-0.672523	-0.709084	-0.309671	-1.27647	0.860995	1.43583	0.701255	0.650432	-0.808858	0.474408	1.28327		0	95.018	1127700000	79	14	14	14	562	562	63.717	31.1	1.46224	-1.28327	-2.544	N1LHD6	N1LHD6	>tr|N1LHD6|N1LHD6_9BACI DNA polymerase III subunits gamma and tau OS=Bacillus sp. GeD10 GN=EBGED10_8920 PE=4 SV=1	N1LHD6		DNA polymerase III subunits gamma and tau	>tr|N1LHD6|N1LHD6_9BACI DNA polymerase III subunits gamma and tau OS=Bacillus sp. GeD10	EBGED10_8920
#N/A	N1LLE7		bged01307	RNA methyltransferase, TrmA family	EBGED10_4530	K00557		0.976787	1.46144	0.0345587		0	-2.04895	-2.28146	-1.3996	NaN	-1.31531	-1.86553	-0.578948	-0.601455	-0.444082	-0.4327	-1.76133	-0.784542	0.976787		0	58.215	460320000	34	11	11	11	459	459	52.007	31.6	1.46144	-0.976787	-2.61702	N1LLE7	N1LLE7	>tr|N1LLE7|N1LLE7_9BACI RNA methyltransferase, TrmA family OS=Bacillus sp. GeD10 GN=EBGED10_4530 PE=4 SV=1	N1LLE7		RNA methyltransferase, TrmA family	>tr|N1LLE7|N1LLE7_9BACI RNA methyltransferase, TrmA family OS=Bacillus sp. GeD10	EBGED10_4530
#N/A	N1LUE8		bged02917	5-methylthioadenosine/S-adenosylhomocysteine nucleosidase	mtnN	K01243		-0.515014	1.45934	0.0347267		0	4.59314	4.2924	3.88599	4.34676	4.45215	3.31711	4.2838	4.01928	3.68068	3.6945	4.31409	3.79907	-0.515014		0	323.31	28149000000	625	13	13	13	231	231	25.226	88.7	1.45934	0.515014	2.53971	N1LUE8	N1LUE8	>tr|N1LUE8|N1LUE8_9BACI 5-methylthioadenosine/S-adenosylhomocysteine nucleosidase OS=Bacillus sp. GeD10 GN=mtnN PE=3 SV=1	N1LUE8		5-methylthioadenosine/S-adenosylhomocysteine nucleosidase	>tr|N1LUE8|N1LUE8_9BACI 5-methylthioadenosine/S-adenosylhomocysteine nucleosidase OS=Bacillus sp. GeD10	mtnN
#N/A	N1LZU7		#N/A	Uncharacterized protein	EBGED10_55270	#N/A		-0.644386	1.45928	0.0347315		0	2.29321	1.93976	2.14812	2.32771	2.48378	0.750384	1.54017	1.93923	1.61305	2.12782	2.23852	1.59413	-0.644386		0	216.94	9093000000	136	5	5	5	78	78	9.1192	44.9	1.45928	0.644386	2.53962	N1LZU7	N1LZU7	>tr|N1LZU7|N1LZU7_9BACI Uncharacterized protein OS=Bacillus sp. GeD10 GN=EBGED10_55270 PE=4 SV=1	N1LZU7		Uncharacterized protein	>tr|N1LZU7|N1LZU7_9BACI Uncharacterized protein OS=Bacillus sp. GeD10	EBGED10_55270
#N/A	N1LWL4		bged01940	Unspecified monosaccharide ABC transport system,ATP-binding protein	EBGED10_57240	K02056		0.802935	1.45453	0.0351128		0	0.138303	0.298563	0.97157	0.69234	0.878791	0.354419	1.4494	1.88173	1.54277	1.76593	0.595913	1.39885	0.802935		0	215.99	3047000000	200	21	21	21	510	510	56.253	54.5	1.45453	-0.802935	-2.5326	N1LWL4	N1LWL4	>tr|N1LWL4|N1LWL4_9BACI Unspecified monosaccharide ABC transport system,ATP-binding protein OS=Bacillus sp. GeD10 GN=EBGED10_57240 PE=3 SV=1	N1LWL4		Unspecified monosaccharide ABC transport system,ATP-binding protein	>tr|N1LWL4|N1LWL4_9BACI Unspecified monosaccharide ABC transport system,ATP-binding protein OS=Bacillus sp. GeD10	EBGED10_57240
#N/A	N1LPM1		#N/A	HD domain protein	EBGED10_32840	K06950		1.36035	1.45101	0.0353992		0	-4.07941	-4.14617	-4.45436	-3.92911	NaN	NaN	-3.44959	-2.13424	NaN	NaN	-4.15226	-2.79191	1.36035		0	25.753	133540000	14	8	8	8	215	215	24.83	47	1.45101	-1.36035	-3.12372	N1LPM1	N1LPM1	>tr|N1LPM1|N1LPM1_9BACI HD domain protein OS=Bacillus sp. GeD10 GN=EBGED10_32840 PE=4 SV=1	N1LPM1		HD domain protein	>tr|N1LPM1|N1LPM1_9BACI HD domain protein OS=Bacillus sp. GeD10	EBGED10_32840
#N/A	N1LM45		#N/A	Alkaline shock protein	EBGED10_25450	K07030		-0.49452	1.44716	0.0357137		0	1.82968	1.9951	1.84389	1.75403	2.28531	1.25603	1.55362	1.87136	0.886496	1.66792	1.9416	1.44708	-0.49452		0	323.31	7249200000	198	6	6	6	130	130	14.075	64.6	1.44716	0.49452	2.52171	N1LM45	N1LM45	>tr|N1LM45|N1LM45_9BACI Alkaline shock protein OS=Bacillus sp. GeD10 GN=EBGED10_25450 PE=4 SV=1	N1LM45		Alkaline shock protein	>tr|N1LM45|N1LM45_9BACI Alkaline shock protein OS=Bacillus sp. GeD10	EBGED10_25450
#N/A	N1M002		bged00689	Phosphopantetheine adenylyltransferase	coaD	K00954		-1.05138	1.44585	0.0358222		0	-0.16309	-0.785464	0.225569	-0.239577	0.664359	-2.41971	-0.954159	-0.90459	-0.438558	-0.83808	-0.0596405	-1.11102	-1.05138		0	73.278	1443600000	39	6	6	6	163	163	18.407	52.8	1.44585	1.05138	2.51976	N1M002	N1M002	>tr|N1M002|N1M002_9BACI Phosphopantetheine adenylyltransferase OS=Bacillus sp. GeD10 GN=coaD PE=3 SV=1	N1M002		Phosphopantetheine adenylyltransferase	>tr|N1M002|N1M002_9BACI Phosphopantetheine adenylyltransferase OS=Bacillus sp. GeD10	coaD
#N/A	N1LU07		bged00641	NADP-dependent malic enzyme	EBGED10_48540	K00027		0.418741	1.44524	0.035872		0	3.80027	3.76558	3.46627	3.4911	3.58607	3.58031	4.18648	4.46406	3.846	4.12614	3.62186	4.0406	0.418741		0	323.31	18549000000	473	24	24	24	412	412	44.109	86.7	1.44524	-0.41874	-2.51887	N1LU07	N1LU07	>tr|N1LU07|N1LU07_9BACI NADP-dependent malic enzyme OS=Bacillus sp. GeD10 GN=EBGED10_48540 PE=3 SV=1	N1LU07		NADP-dependent malic enzyme	>tr|N1LU07|N1LU07_9BACI NADP-dependent malic enzyme OS=Bacillus sp. GeD10	EBGED10_48540
#N/A	N1LQL8		bged02824	Ribosomal RNA small subunit methyltransferase C	EBGED10_22640	K00564		0.859282	1.44318	0.0360433		0	-0.472675	-1.04285	-0.402	-0.305341	-0.328058	-0.774456	0.357652	0.896246	0.287948	0.978099	-0.510184	0.349098	0.859282		0	134.32	2747400000	101	15	15	15	199	199	22.466	71.9	1.44318	-0.859282	-2.51581	N1LQL8	N1LQL8	>tr|N1LQL8|N1LQL8_9BACI Ribosomal RNA small subunit methyltransferase C OS=Bacillus sp. GeD10 GN=EBGED10_22640 PE=4 SV=1	N1LQL8		Ribosomal RNA small subunit methyltransferase C	>tr|N1LQL8|N1LQL8_9BACI Ribosomal RNA small subunit methyltransferase C OS=Bacillus sp. GeD10	EBGED10_22640
#N/A	N1LJC6		#N/A	Uncharacterized protein	EBGED10_15740	K06218		-0.550328	1.44176	0.0361608		0	2.35884	2.84975	2.81956	3.07905	3.20682	2.90957	1.90853	2.18994	2.26554	2.28881	2.86281	2.31248	-0.550328		0	105.56	10492000000	169	6	6	6	74	74	8.583	59.5	1.44176	0.550328	2.51372	N1LJC6	N1LJC6	>tr|N1LJC6|N1LJC6_9BACI Uncharacterized protein OS=Bacillus sp. GeD10 GN=EBGED10_15740 PE=4 SV=1	N1LJC6		Uncharacterized protein	>tr|N1LJC6|N1LJC6_9BACI Uncharacterized protein OS=Bacillus sp. GeD10	EBGED10_15740
#N/A	N1LPW1		bged00709	Phosphoserine aminotransferase	serC	K00831		0.629624	1.44174	0.0361625		0	0.828947	0.819707	0.900118	1.30838	1.02191	0.701267	1.69149	1.99706	1.92152	1.71583	0.975811	1.60543	0.629624		0	240.97	4013500000	219	17	17	17	360	360	40.375	61.9	1.44174	-0.629624	-2.51369	N1LPW1	N1LPW1	>tr|N1LPW1|N1LPW1_9BACI Phosphoserine aminotransferase OS=Bacillus sp. GeD10 GN=serC PE=3 SV=1	N1LPW1		Phosphoserine aminotransferase	>tr|N1LPW1|N1LPW1_9BACI Phosphoserine aminotransferase OS=Bacillus sp. GeD10	serC
#N/A	N1LRE9		bged01203	DNA repair protein RecN	EBGED10_25360	K03631		1.60742	1.43831	0.0364496		0	-0.593194	-3.2627	-1.33923	-3.24333	-1.22606	-0.903799	-0.801259	-0.0053261	-0.715607	0.798553	-1.9329	-0.325488	1.60742		0	100.74	624760000	47	12	12	12	600	600	68.219	28.7	1.43831	-1.60742	-2.50861	N1LRE9	N1LRE9	>tr|N1LRE9|N1LRE9_9BACI DNA repair protein RecN OS=Bacillus sp. GeD10 GN=EBGED10_25360 PE=3 SV=1	N1LRE9		DNA repair protein RecN	>tr|N1LRE9|N1LRE9_9BACI DNA repair protein RecN OS=Bacillus sp. GeD10	EBGED10_25360
#N/A	N1LPV2		#N/A	Uncharacterized protein	EBGED10_16960	#N/A		-0.723238	1.43645	0.0366054		0	0.108899	-0.348603	0.276751	0.231318	0.661332	-1.1322	-1.10787	-0.0868378	-0.176472	-0.183112	0.185939	-0.537299	-0.723238		0	70.809	2022000000	63	7	7	7	154	154	17.735	37.7	1.43645	0.723238	2.50588	N1LPV2	N1LPV2	>tr|N1LPV2|N1LPV2_9BACI Uncharacterized protein OS=Bacillus sp. GeD10 GN=EBGED10_16960 PE=4 SV=1	N1LPV2		Uncharacterized protein	>tr|N1LPV2|N1LPV2_9BACI Uncharacterized protein OS=Bacillus sp. GeD10	EBGED10_16960
#N/A	N1LNW0		#N/A	PhnB protein	EBGED10_36600	K04750		-0.84836	1.4339	0.0368214		0	-1.17596	-1.0182	-0.557971	-0.966616	-0.580718	-1.29716	NaN	NaN	-2.11934	NaN	-0.859892	-1.70825	-0.84836		0	75.417	685660000	25	4	4	4	135	135	15.357	42.2	1.4339	0.84836	2.82661	N1LNW0	N1LNW0	>tr|N1LNW0|N1LNW0_9BACI PhnB protein OS=Bacillus sp. GeD10 GN=EBGED10_36600 PE=4 SV=1	N1LNW0		PhnB protein	>tr|N1LNW0|N1LNW0_9BACI PhnB protein OS=Bacillus sp. GeD10	EBGED10_36600
#N/A	N1LG78		bged00123	Pyrophosphatase PpaX	ppaX	K06019		1.61976	1.43247	0.0369432		0	NaN	-3.16736	-2.62285	NaN	NaN	NaN	NaN	-1.44401	NaN	-1.10667	-2.89511	-1.27534	1.61976		0	23.249	395910000	21	6	6	6	216	216	24.825	39.4	1.43247	-1.61976	-5.05747	N1LG78	N1LG78	>tr|N1LG78|N1LG78_9BACI Pyrophosphatase PpaX OS=Bacillus sp. GeD10 GN=ppaX PE=3 SV=1	N1LG78		Pyrophosphatase PpaX	>tr|N1LG78|N1LG78_9BACI Pyrophosphatase PpaX OS=Bacillus sp. GeD10	ppaX
#N/A	N1LMP2		bged00024	Bifunctional protein FolD	folD	K01491		0.304999	1.42544	0.0375459		0	3.56942	3.45425	3.25491	3.61124	3.78319	3.62501	3.66124	3.99554	4.04849	3.86773	3.5346	3.8396	0.304999		0	323.31	21022000000	589	24	24	24	286	286	31.09	74.1	1.42544	-0.304999	-2.4896	N1LMP2	N1LMP2	>tr|N1LMP2|N1LMP2_9BACI Bifunctional protein FolD OS=Bacillus sp. GeD10 GN=folD PE=3 SV=1	N1LMP2		Bifunctional protein FolD	>tr|N1LMP2|N1LMP2_9BACI Bifunctional protein FolD OS=Bacillus sp. GeD10	folD
#N/A	N1LJI6		#N/A	Uncharacterized protein	EBGED10_16440	#N/A		0.84834	1.41133	0.0387852		0	-2.90082	-2.59993	-2.58829	-1.83247	-1.87968	-2.39562	-1.24234	-1.56808	-1.60627	-0.747189	-2.36024	-1.5119	0.84834		0	66.803	395780000	32	7	7	7	381	381	45.352	33.1	1.41133	-0.84834	-2.46876	N1LJI6	N1LJI6	>tr|N1LJI6|N1LJI6_9BACI Uncharacterized protein OS=Bacillus sp. GeD10 GN=EBGED10_16440 PE=4 SV=1	N1LJI6		Uncharacterized protein	>tr|N1LJI6|N1LJI6_9BACI Uncharacterized protein OS=Bacillus sp. GeD10	EBGED10_16440
#N/A	N1LQ81		bged01961	ABC transporter ATP-binding protein uup	EBGED10_21240	K06158		0.736777	1.41032	0.0388755		0	0.501913	0.531718	0.902145	0.987859	1.21365	0.738094	1.23988	1.74395	1.80635	2.2929	0.827458	1.56424	0.736777		0	235.38	2185400000	112	16	16	16	659	659	75.286	38.7	1.41032	-0.736777	-2.46727	N1LQ81	N1LQ81	>tr|N1LQ81|N1LQ81_9BACI ABC transporter ATP-binding protein uup OS=Bacillus sp. GeD10 GN=EBGED10_21240 PE=3 SV=1	N1LQ81		ABC transporter ATP-binding protein uup	>tr|N1LQ81|N1LQ81_9BACI ABC transporter ATP-binding protein uup OS=Bacillus sp. GeD10	EBGED10_21240
#N/A	N1M0X0		bged01492	D-alanine--poly(phosphoribitol) ligase subunit 2	dltC	K14188		-0.852	1.41005	0.0388999		0	-0.0692521	1.01341	0.462793	0.631094	1.22681	-0.73314	0.791037	-0.249732	-0.496667	-0.306639	0.652972	-0.199028	-0.852		0	246.75	2241100000	72	4	4	4	79	79	9.2614	55.7	1.41005	0.852	2.46687	N1M0X0	N1M0X0	>tr|N1M0X0|N1M0X0_9BACI D-alanine--poly(phosphoribitol) ligase subunit 2 OS=Bacillus sp. GeD10 GN=dltC PE=3 SV=1	N1M0X0		D-alanine--poly(phosphoribitol) ligase subunit 2	>tr|N1M0X0|N1M0X0_9BACI D-alanine--poly(phosphoribitol) ligase subunit 2 OS=Bacillus sp. GeD10	dltC
#N/A	N1LK68		bged00170	Putative septation protein SpoVG	spoVG	K06412		-0.466593	1.40499	0.0393555		0	4.42832	4.87179	4.61914	4.62221	4.26289	3.64143	3.78354	4.26761	4.3458	4.433	4.56087	4.09428	-0.466593		0	323.31	53324000000	649	12	12	12	97	97	10.934	88.7	1.40499	0.466593	2.4594	N1LK68	N1LK68	>tr|N1LK68|N1LK68_9BACI Putative septation protein SpoVG OS=Bacillus sp. GeD10 GN=spoVG PE=3 SV=1	N1LK68		Putative septation protein SpoVG	>tr|N1LK68|N1LK68_9BACI Putative septation protein SpoVG OS=Bacillus sp. GeD10	spoVG
#N/A	N1LUM1		bged00942	Acyl carrier protein	acpP	K02078		-0.786738	1.40306	0.0395314		0	4.35185	5.19557	5.29313	5.14761	5.48982	4.77269	4.75072	4.62333	3.8355	3.56205	5.0956	4.30886	-0.786738		0	102.49	45767000000	178	3	3	3	77	77	8.5124	48.1	1.40306	0.786738	2.45654	N1LUM1	N1LUM1	>tr|N1LUM1|N1LUM1_9BACI Acyl carrier protein OS=Bacillus sp. GeD10 GN=acpP PE=3 SV=1	N1LUM1		Acyl carrier protein	>tr|N1LUM1|N1LUM1_9BACI Acyl carrier protein OS=Bacillus sp. GeD10	acpP
#N/A	N1LLB6		bged00932	Protein translocase subunit SecY	secY	K03076		1.85727	1.39858	0.0399415		0	NaN	-2.77298	NaN	NaN	-2.25233	-1.66503	-0.910124	NaN	-0.134926	0.088527	-2.51266	-0.655388	1.85727		0	44.692	224200000	13	5	5	5	433	433	47.53	17.3	1.39858	-1.85727	-3.00001	N1LLB6	N1LLB6	>tr|N1LLB6|N1LLB6_9BACI Protein translocase subunit SecY OS=Bacillus sp. GeD10 GN=secY PE=3 SV=1	N1LLB6		Protein translocase subunit SecY	>tr|N1LLB6|N1LLB6_9BACI Protein translocase subunit SecY OS=Bacillus sp. GeD10	secY
#N/A	N1LW61		bged02482	Zinc metalloprotease	EBGED10_56960	K11749		1.16032	1.3975	0.0400406		0	-1.45345	-1.33173	-1.58875	-1.01097	-0.659457	-1.62969	-0.0711288	0.189221	0.164383	1.10446	-1.20887	-0.0485509	1.16032		0	124.02	682160000	73	14	14	14	418	418	46.892	43.3	1.3975	-1.16032	-2.44833	N1LW61	N1LW61	>tr|N1LW61|N1LW61_9BACI Zinc metalloprotease OS=Bacillus sp. GeD10 GN=EBGED10_56960 PE=3 SV=1	N1LW61		Zinc metalloprotease	>tr|N1LW61|N1LW61_9BACI Zinc metalloprotease OS=Bacillus sp. GeD10	EBGED10_56960
#N/A	N1LWE7		bged01420	Methionyl-tRNA formyltransferase	fmt	K00604		0.530746	1.39627	0.0401538		0	1.69426	1.34696	1.42167	1.74353	1.81645	1.48588	1.92766	2.27479	2.61106	2.3772	1.60457	2.13532	0.530746		0	323.31	6765400000	266	22	22	22	314	314	34.747	84.7	1.39627	-0.530746	-2.44653	N1LWE7	N1LWE7	>tr|N1LWE7|N1LWE7_9BACI Methionyl-tRNA formyltransferase OS=Bacillus sp. GeD10 GN=fmt PE=3 SV=1	N1LWE7		Methionyl-tRNA formyltransferase	>tr|N1LWE7|N1LWE7_9BACI Methionyl-tRNA formyltransferase OS=Bacillus sp. GeD10	fmt
#N/A	N1M0G0		bged01501	N-acetyl-L,L-diaminopimelate aminotransferase	EBGED10_55030	K00841		0.638411	1.39586	0.0401925		0	0.563946	1.06308	1.14747	1.29037	1.39091	1.11822	1.98924	1.38722	2.35215	1.801	1.09116	1.72957	0.638411		0	243.7	2567100000	151	13	13	13	387	387	43.443	64.9	1.39586	-0.638411	-2.44591	N1M0G0	N1M0G0	>tr|N1M0G0|N1M0G0_9BACI N-acetyl-L,L-diaminopimelate aminotransferase OS=Bacillus sp. GeD10 GN=EBGED10_55030 PE=3 SV=1	N1M0G0		N-acetyl-L,L-diaminopimelate aminotransferase	>tr|N1M0G0|N1M0G0_9BACI N-acetyl-L,L-diaminopimelate aminotransferase OS=Bacillus sp. GeD10	EBGED10_55030
#N/A	N1LM70		bged02439	Cytosine deaminase	EBGED10_23510	K01485		0.650556	1.39165	0.0405833		0	NaN	-0.397465	-0.277508	0.0827531	-0.933506	-0.0433382	-0.132007	0.485761	0.30863	0.726577	-0.381432	0.269125	0.650556		0	142.66	803260000	44	11	11	11	413	413	45.71	43.3	1.39165	-0.650556	-2.50685	N1LM70	N1LM70	>tr|N1LM70|N1LM70_9BACI Cytosine deaminase OS=Bacillus sp. GeD10 GN=EBGED10_23510 PE=4 SV=1	N1LM70		Cytosine deaminase	>tr|N1LM70|N1LM70_9BACI Cytosine deaminase OS=Bacillus sp. GeD10	EBGED10_23510
#N/A	N1LIA6		bged02354	Uncharacterized protein	EBGED10_17880	K14761		-0.550401	1.38453	0.0412543		0	1.60284	1.23763	1.50659	1.15182	1.65374	0.915262	0.280757	0.658133	1.50534	1.04112	1.43052	0.880123	-0.550401		0	243.77	5029400000	88	7	7	7	70	70	8.0391	92.9	1.38453	0.5504	2.42919	N1LIA6	N1LIA6	>tr|N1LIA6|N1LIA6_9BACI Uncharacterized protein OS=Bacillus sp. GeD10 GN=EBGED10_17880 PE=4 SV=1	N1LIA6		Uncharacterized protein	>tr|N1LIA6|N1LIA6_9BACI Uncharacterized protein OS=Bacillus sp. GeD10	EBGED10_17880
#N/A	N1LLC2		bged02188	30S ribosomal protein S13	rpsM	K02952		-0.56941	1.38452	0.0412554		0	6.40435	5.72412	5.51157	5.93581	5.58436	4.61386	5.50557	5.43328	5.22495	5.53549	5.83204	5.26263	-0.56941		0	323.31	118460000000	1324	16	16	16	121	121	13.819	71.9	1.38452	0.56941	2.42917	N1LLC2	N1LLC2	>tr|N1LLC2|N1LLC2_9BACI 30S ribosomal protein S13 OS=Bacillus sp. GeD10 GN=rpsM PE=3 SV=1	N1LLC2		30S ribosomal protein S13	>tr|N1LLC2|N1LLC2_9BACI 30S ribosomal protein S13 OS=Bacillus sp. GeD10	rpsM
#N/A	N1LNQ4		#N/A	Uncharacterized protein	EBGED10_15900	K18640		0.591101	1.38109	0.041582		0	0.350537	0.509329	0.593396	0.737719	0.983209	0.39	1.2277	1.45075	1.42123	1.64001	0.634838	1.22594	0.591101		0	274.16	2720400000	225	19	19	19	397	397	45.093	56.9	1.38109	-0.591101	-2.42412	N1LNQ4	N1LNQ4	>tr|N1LNQ4|N1LNQ4_9BACI Uncharacterized protein OS=Bacillus sp. GeD10 GN=EBGED10_15900 PE=4 SV=1	N1LNQ4		Uncharacterized protein	>tr|N1LNQ4|N1LNQ4_9BACI Uncharacterized protein OS=Bacillus sp. GeD10	EBGED10_15900
#N/A	N1LJV8		bged00562	AA3-600 quinol oxidase subunit II	EBGED10_15370	K02826		0.990901	1.37954	0.0417312		0	-0.201402	0.41365	1.01158	0.133539	0.800955	0.36039	1.18758	1.21867	2.04291	2.30328	0.431665	1.42257	0.990901		0	170.34	3236900000	133	10	10	10	291	291	33.293	42.6	1.37954	-0.990901	-2.42182	N1LJV8	N1LJV8	>tr|N1LJV8|N1LJV8_9BACI AA3-600 quinol oxidase subunit II OS=Bacillus sp. GeD10 GN=EBGED10_15370 PE=4 SV=1	N1LJV8		AA3-600 quinol oxidase subunit II	>tr|N1LJV8|N1LJV8_9BACI AA3-600 quinol oxidase subunit II OS=Bacillus sp. GeD10	EBGED10_15370
#N/A	N1LNA1		bged00521	O-acetylhomoserine sulfhydrylase / O-succinylhomoserine sulfhydrylase	EBGED10_27830	K01740		0.99314	1.37903	0.0417798		0	NaN	-1.2576	-1.93686	-1.71741	-1.60316	-1.84092	-0.888365	-0.23338	-0.150163	-0.0652739	-1.62876	-0.635621	0.99314		0	83.449	382480000	32	10	10	10	432	432	46.557	38.9	1.37903	-0.99314	-2.487	N1LNA1	N1LNA1	>tr|N1LNA1|N1LNA1_9BACI O-acetylhomoserine sulfhydrylase / O-succinylhomoserine sulfhydrylase OS=Bacillus sp. GeD10 GN=EBGED10_27830 PE=3 SV=1	N1LNA1		O-acetylhomoserine sulfhydrylase / O-succinylhomoserine sulfhydrylase	>tr|N1LNA1|N1LNA1_9BACI O-acetylhomoserine sulfhydrylase / O-succinylhomoserine sulfhydrylase OS=Bacillus sp. GeD10	EBGED10_27830
#N/A	N1LUD9		bged02835	O-methyltransferase family protein	EBGED10_50210	K00588		1.17985	1.37744	0.0419331		0	NaN	-2.32579	-3.09883	-3.0061	NaN	NaN	-1.82125	-1.43952	NaN	NaN	-2.81024	-1.63039	1.17985		0	45.728	468120000	18	5	5	5	213	213	24.631	31	1.37744	-1.17985	-3.41706	N1LUD9	N1LUD9	>tr|N1LUD9|N1LUD9_9BACI O-methyltransferase family protein OS=Bacillus sp. GeD10 GN=EBGED10_50210 PE=4 SV=1	N1LUD9		O-methyltransferase family protein	>tr|N1LUD9|N1LUD9_9BACI O-methyltransferase family protein OS=Bacillus sp. GeD10	EBGED10_50210
#N/A	N1LFK0		bged00566	Deoxyadenosine kinase / Deoxyguanosine kinase	EBGED10_8960	K15519		1.09017	1.37718	0.0419586		0	-4.70273	-2.97055	-3.07789	-3.56703	-2.57921	NaN	-2.41101	-2.67119	-2.14661	-1.92844	-3.37948	-2.28931	1.09017		0	78.892	300840000	33	6	6	6	222	222	26.089	33.8	1.37718	-1.09017	-2.48408	N1LFK0	N1LFK0	>tr|N1LFK0|N1LFK0_9BACI Deoxyadenosine kinase / Deoxyguanosine kinase OS=Bacillus sp. GeD10 GN=EBGED10_8960 PE=4 SV=1	N1LFK0		Deoxyadenosine kinase / Deoxyguanosine kinase	>tr|N1LFK0|N1LFK0_9BACI Deoxyadenosine kinase / Deoxyguanosine kinase OS=Bacillus sp. GeD10	EBGED10_8960
#N/A	N1LZ89		bged02655	FIG139598: Potential ribosomal protein	EBGED10_53070	K07584		0.768585	1.36528	0.0431245		0	-0.590618	-0.874902	-0.902305	-0.695665	-0.157286	0.0496037	-0.889629	0.479982	0.850352	0.131841	-0.644155	0.12443	0.768585		0	17.023	1002000000	64	3	3	3	114	114	12.354	28.9	1.36528	-0.768585	-2.40078	N1LZ89	N1LZ89	>tr|N1LZ89|N1LZ89_9BACI FIG139598: Potential ribosomal protein OS=Bacillus sp. GeD10 GN=EBGED10_53070 PE=4 SV=1	N1LZ89		FIG139598: Potential ribosomal protein	>tr|N1LZ89|N1LZ89_9BACI FIG139598: Potential ribosomal protein OS=Bacillus sp. GeD10	EBGED10_53070
#N/A	N1LI34		bged01205	Recombination protein RecR	recR	K06187		-0.995256	1.36293	0.0433584		0	-0.560914	-0.620452	-0.76507	-0.0976449	0.00630056	-2.63751	-1.11362	-0.574274	-1.92814	-0.760522	-0.407556	-1.40281	-0.995256		0	149.27	1037700000	75	6	6	6	198	198	21.976	52.5	1.36293	0.995257	2.39731	N1LI34	N1LI34	>tr|N1LI34|N1LI34_9BACI Recombination protein RecR OS=Bacillus sp. GeD10 GN=recR PE=3 SV=1	N1LI34		Recombination protein RecR	>tr|N1LI34|N1LI34_9BACI Recombination protein RecR OS=Bacillus sp. GeD10	recR
#N/A	N1LHA9		#N/A	Uncharacterized protein	EBGED10_14280	#N/A		0.866449	1.36195	0.0434563		0	-3.05023	-3.30434	-3.70086	-2.30024	-2.46518	NaN	-2.07193	-1.85423	-2.72107	-1.74365	-2.96417	-2.09772	0.866449		0	66.738	320770000	28	7	7	7	295	295	33.113	31.2	1.36195	-0.866448	-2.46014	N1LHA9	N1LHA9	>tr|N1LHA9|N1LHA9_9BACI Uncharacterized protein OS=Bacillus sp. GeD10 GN=EBGED10_14280 PE=4 SV=1	N1LHA9		Uncharacterized protein	>tr|N1LHA9|N1LHA9_9BACI Uncharacterized protein OS=Bacillus sp. GeD10	EBGED10_14280
#N/A	N1LUI7		bged02433	Carbamoyl-phosphate synthase (glutamine-hydrolyzing)	EBGED10_56300	K01955		0.596313	1.35551	0.0441049		0	6.6836	6.93295	7.18274	7.20688	7.05973	6.9007	7.82869	7.29971	8.23214	7.78622	7.01318	7.60949	0.596313		0	323.31	114870000000	1350	62	62	62	1072	1072	118.68	72.8	1.35551	-0.596313	-2.38637	N1LUI7	N1LUI7	>tr|N1LUI7|N1LUI7_9BACI Carbamoyl-phosphate synthase (glutamine-hydrolyzing) OS=Bacillus sp. GeD10 GN=EBGED10_56300 PE=3 SV=1	N1LUI7		Carbamoyl-phosphate synthase (glutamine-hydrolyzing)	>tr|N1LUI7|N1LUI7_9BACI Carbamoyl-phosphate synthase (glutamine-hydrolyzing) OS=Bacillus sp. GeD10	EBGED10_56300
#N/A	N1LSU3		bged00467	Transcription elongation factor GreA	greA	K03624		-0.842927	1.35244	0.0444186		0	3.47205	3.54122	3.50579	4.80726	3.73951	2.16048	3.02142	3.68903	2.83096	3.14931	3.81317	2.97024	-0.842927		0	323.31	23717000000	356	12	12	12	175	175	19.525	69.7	1.35244	0.842927	2.38183	N1LSU3	N1LSU3	>tr|N1LSU3|N1LSU3_9BACI Transcription elongation factor GreA OS=Bacillus sp. GeD10 GN=greA PE=3 SV=1	N1LSU3		Transcription elongation factor GreA	>tr|N1LSU3|N1LSU3_9BACI Transcription elongation factor GreA OS=Bacillus sp. GeD10	greA
#N/A	N1LVK8		bged03424	Choloylglycine hydrolase	EBGED10_40120	K01442		0.636952	1.35227	0.0444351		0	-1.62494	-0.924824	-1.0501	-0.318306	-1.03891	-0.835355	-0.593055	-0.110802	-0.345956	0.112854	-0.991415	-0.354463	0.636952		0	161.07	1015500000	69	8	8	8	309	309	34.62	35.6	1.35227	-0.636952	-2.38159	N1LVK8	N1LVK8	>tr|N1LVK8|N1LVK8_9BACI Choloylglycine hydrolase OS=Bacillus sp. GeD10 GN=EBGED10_40120 PE=4 SV=1	N1LVK8		Choloylglycine hydrolase	>tr|N1LVK8|N1LVK8_9BACI Choloylglycine hydrolase OS=Bacillus sp. GeD10	EBGED10_40120
#N/A	N1LNY1		bged03216	Lipase/acylhydrolase, putative	EBGED10_36800	K12583		-0.84842	1.35217	0.0444457		0	0.862008	0.618984	1.33257	1.18353	1.79397	-0.772336	0.635121	0.246566	0.951838	0.48777	1.15821	0.309792	-0.84842		0	246.02	3607200000	85	7	7	7	196	196	22.448	58.7	1.35217	0.84842	2.38144	N1LNY1	N1LNY1	>tr|N1LNY1|N1LNY1_9BACI Lipase/acylhydrolase, putative OS=Bacillus sp. GeD10 GN=EBGED10_36800 PE=4 SV=1	N1LNY1		Lipase/acylhydrolase, putative	>tr|N1LNY1|N1LNY1_9BACI Lipase/acylhydrolase, putative OS=Bacillus sp. GeD10	EBGED10_36800
#N/A	N1LWY9		bged01697	Oligopeptide transport ATP-binding protein OppD (TC 3.A.1.5.1)	EBGED10_59360	K15583		0.426544	1.34994	0.0446746		0	3.23032	2.72328	2.70755	3.20768	3.08873	2.99787	3.46609	3.84761	3.31007	3.46863	2.99151	3.41805	0.426544		0	323.31	14314000000	439	18	18	18	347	347	38.061	75.5	1.34994	-0.426544	-2.37815	N1LWY9	N1LWY9	>tr|N1LWY9|N1LWY9_9BACI Oligopeptide transport ATP-binding protein OppD (TC 3.A.1.5.1) OS=Bacillus sp. GeD10 GN=EBGED10_59360 PE=3 SV=1	N1LWY9		Oligopeptide transport ATP-binding protein OppD (TC 3.A.1.5.1)	>tr|N1LWY9|N1LWY9_9BACI Oligopeptide transport ATP-binding protein OppD (TC 3.A.1.5.1) OS=Bacillus sp. GeD10	EBGED10_59360
#N/A	N1LYD1		bged01833	Peptide chain release factor 2	prfB	K02836		0.737385	1.34991	0.0446777		0	0.242056	0.849386	0.780441	1.22063	1.46705	0.844138	1.46976	1.93809	2.14466	1.84984	0.911912	1.6493	0.737385		0	323.31	3613800000	163	14	14	14	326	326	37.2	67.5	1.34991	-0.737385	-2.3781	N1LYD1	N1LYD1	>tr|N1LYD1|N1LYD1_9BACI Peptide chain release factor 2 OS=Bacillus sp. GeD10 GN=prfB PE=3 SV=1	N1LYD1		Peptide chain release factor 2	>tr|N1LYD1|N1LYD1_9BACI Peptide chain release factor 2 OS=Bacillus sp. GeD10	prfB
#N/A	N1LII7		bged02090	NADH dehydrogenase	EBGED10_12990	K03885		0.373704	1.34922	0.0447482		0	4.85449	5.22283	5.20646	5.40464	5.57845	5.54199	5.35735	5.85242	5.87119	5.51244	5.25337	5.62708	0.373704		0	323.31	49556000000	1136	21	21	21	392	392	41.572	80.9	1.34922	-0.373704	-2.37709	N1LII7	N1LII7	>tr|N1LII7|N1LII7_9BACI NADH dehydrogenase OS=Bacillus sp. GeD10 GN=EBGED10_12990 PE=4 SV=1	N1LII7		NADH dehydrogenase	>tr|N1LII7|N1LII7_9BACI NADH dehydrogenase OS=Bacillus sp. GeD10	EBGED10_12990
#N/A	N1LSL1		#N/A	Uncharacterized protein	EBGED10_26920	#N/A		-1.1663	1.34829	0.0448451		0	-2.79714	-1.72515	-0.782818	-0.985742	-0.664871	NaN	-2.96378	-2.45409	-2.10104	-2.71085	-1.39114	-2.55744	-1.1663		0	39.423	483180000	35	7	7	7	158	158	17.551	67.7	1.34829	1.1663	2.43869	N1LSL1	N1LSL1	>tr|N1LSL1|N1LSL1_9BACI Uncharacterized protein OS=Bacillus sp. GeD10 GN=EBGED10_26920 PE=4 SV=1	N1LSL1		Uncharacterized protein	>tr|N1LSL1|N1LSL1_9BACI Uncharacterized protein OS=Bacillus sp. GeD10	EBGED10_26920
#N/A	N1LKP7		bged01274	cAMP-dependent protein kinase regulatory chain	EBGED10_1910	K01420		-0.88202	1.34586	0.0450959		0	NaN	-3.29884	NaN	-2.9768	-2.66093	NaN	-4.3033	-3.45746	NaN	-3.82187	-2.97885	-3.86087	-0.88202		0	26.163	133250000	11	3	3	3	170	170	19.766	28.8	1.34586	0.88202	2.87817	N1LKP7	N1LKP7	>tr|N1LKP7|N1LKP7_9BACI cAMP-dependent protein kinase regulatory chain OS=Bacillus sp. GeD10 GN=EBGED10_1910 PE=4 SV=1	N1LKP7		cAMP-dependent protein kinase regulatory chain	>tr|N1LKP7|N1LKP7_9BACI cAMP-dependent protein kinase regulatory chain OS=Bacillus sp. GeD10	EBGED10_1910
#N/A	N1LFU3		bged01302	Uncharacterized protein	EBGED10_660	K02761		-0.746171	1.34088	0.0456161		0	-2.84326	-2.38049	-2.26523	-2.78116	-2.16567	-4.05825	-3.77342	-2.70762	-2.73237	-2.895	-2.48716	-3.23333	-0.746171		0	85.384	348160000	20	3	3	3	87	87	9.9413	37.9	1.34088	0.746171	2.36479	N1LFU3	N1LFU3	>tr|N1LFU3|N1LFU3_9BACI Uncharacterized protein OS=Bacillus sp. GeD10 GN=EBGED10_660 PE=4 SV=1	N1LFU3		Uncharacterized protein	>tr|N1LFU3|N1LFU3_9BACI Uncharacterized protein OS=Bacillus sp. GeD10	EBGED10_660
#N/A	N1LSN5		bged00559	Cysteine synthase	EBGED10_27170	K01738		0.534227	1.33936	0.0457758		0	-1.13619	-1.18729	-1.20358	-0.942047	-1.16925	-1.32854	-0.568488	0.0452193	-0.670917	-0.444495	-1.12767	-0.593443	0.534227		0	160.72	897230000	62	8	8	8	305	305	32.752	36.4	1.33936	-0.534227	-2.36255	N1LSN5	N1LSN5	>tr|N1LSN5|N1LSN5_9BACI Cysteine synthase OS=Bacillus sp. GeD10 GN=EBGED10_27170 PE=3 SV=1	N1LSN5		Cysteine synthase	>tr|N1LSN5|N1LSN5_9BACI Cysteine synthase OS=Bacillus sp. GeD10	EBGED10_27170
#N/A	N1LL08		bged01318	33 kDa chaperonin	hslO	K04083		0.42058	1.33551	0.0461838		0	2.36029	2.4376	1.8317	2.54063	2.60004	2.5709	2.57315	3.17966	2.86288	2.68657	2.35405	2.77463	0.42058		0	323.31	12401000000	286	13	13	13	291	291	32.044	57	1.33551	-0.42058	-2.35686	N1LL08	N1LL08	>tr|N1LL08|N1LL08_9BACI 33 kDa chaperonin OS=Bacillus sp. GeD10 GN=hslO PE=3 SV=1	N1LL08		33 kDa chaperonin	>tr|N1LL08|N1LL08_9BACI 33 kDa chaperonin OS=Bacillus sp. GeD10	hslO
#N/A	N1LUH7		#N/A	General stress protein	EBGED10_50660	#N/A		1.11205	1.33485	0.0462538		0	-2.65559	-2.8383	-2.77326	-2.46377	-1.00109	-2.43598	-1.0609	-0.512241	-1.26916	-0.893462	-2.3464	-1.23435	1.11205		0	169.81	1034100000	23	7	7	7	170	170	19.107	54.7	1.33485	-1.11205	-2.35589	N1LUH7	N1LUH7	>tr|N1LUH7|N1LUH7_9BACI General stress protein OS=Bacillus sp. GeD10 GN=EBGED10_50660 PE=4 SV=1	N1LUH7		General stress protein	>tr|N1LUH7|N1LUH7_9BACI General stress protein OS=Bacillus sp. GeD10	EBGED10_50660
#N/A	N1LLH8		bged02841	Inactive homolog of metal-dependent proteases,putative molecular chaperone	EBGED10_21210	K14742		-0.70346	1.33397	0.0463483		0	NaN	NaN	-0.55449	-0.0738175	NaN	NaN	-1.31546	-0.905246	-1.13776	-0.711994	-0.314154	-1.01761	-0.70346		0	37.463	831670000	44	7	7	7	230	230	25.419	49.6	1.33397	0.70346	2.85101	N1LLH8	N1LLH8	>tr|N1LLH8|N1LLH8_9BACI Inactive homolog of metal-dependent proteases,putative molecular chaperone OS=Bacillus sp. GeD10 GN=EBGED10_21210 PE=4 SV=1	N1LLH8		Inactive homolog of metal-dependent proteases,putative molecular chaperone	>tr|N1LLH8|N1LLH8_9BACI Inactive homolog of metal-dependent proteases,putative molecular chaperone OS=Bacillus sp. GeD10	EBGED10_21210
#N/A	N1LRH8		bged02185	Protein secretion chaperonin CsaA	EBGED10_40710	K06878		-0.957009	1.33096	0.0466701		0	-2.84455	NaN	NaN	-3.40952	-2.63083	-4.67944	NaN	-3.51491	-3.80233	-3.67788	-2.96163	-3.91864	-0.957009		0	6.6999	181370000	12	2	2	2	109	109	11.886	21.1	1.33096	0.957009	2.62756	N1LRH8	N1LRH8	>tr|N1LRH8|N1LRH8_9BACI Protein secretion chaperonin CsaA OS=Bacillus sp. GeD10 GN=EBGED10_40710 PE=4 SV=1	N1LRH8		Protein secretion chaperonin CsaA	>tr|N1LRH8|N1LRH8_9BACI Protein secretion chaperonin CsaA OS=Bacillus sp. GeD10	EBGED10_40710
#N/A	N1LG73		bged00251	UvrABC system protein A	uvrA	K03701		0.734395	1.33035	0.0467358		0	1.01686	1.29468	1.40884	1.34481	1.53099	1.06805	2.12154	1.8255	2.37709	2.87599	1.31924	2.05363	0.734395		0	323.31	3047700000	218	32	32	32	958	958	106.57	45.6	1.33035	-0.734395	-2.34925	N1LG73	N1LG73	>tr|N1LG73|N1LG73_9BACI UvrABC system protein A OS=Bacillus sp. GeD10 GN=uvrA PE=3 SV=1	N1LG73		UvrABC system protein A	>tr|N1LG73|N1LG73_9BACI UvrABC system protein A OS=Bacillus sp. GeD10	uvrA
#N/A	N1LSD3		bged00618	Probable glycine dehydrogenase (decarboxylating) subunit 2	gcvPB	K00283		0.369708	1.32616	0.0471894		0	5.47231	5.45061	5.30155	5.70955	5.57715	6.01575	5.47852	5.68562	5.86595	6.31387	5.50223	5.87194	0.369708		0	323.31	66365000000	1282	39	39	39	491	491	54.842	81.1	1.32616	-0.369708	-2.34306	N1LSD3	N1LSD3	>tr|N1LSD3|N1LSD3_9BACI Probable glycine dehydrogenase (decarboxylating) subunit 2 OS=Bacillus sp. GeD10 GN=gcvPB PE=3 SV=1	N1LSD3		Probable glycine dehydrogenase (decarboxylating) subunit 2	>tr|N1LSD3|N1LSD3_9BACI Probable glycine dehydrogenase (decarboxylating) subunit 2 OS=Bacillus sp. GeD10	gcvPB
#N/A	N1M113		#N/A	Stage V sporulation protein required for dehydratation of the spore core and assembly of the coat (SpoVS)	EBGED10_57380	K06416		-0.611476	1.3249	0.0473263		0	1.73705	2.26392	1.8857	2.29285	2.46143	1.41975	1.32523	1.81594	0.855483	2.16717	2.12819	1.51671	-0.611476		0	208.25	8190400000	108	5	5	5	86	86	8.8693	75.6	1.3249	0.611476	2.34121	N1M113	N1M113	>tr|N1M113|N1M113_9BACI Stage V sporulation protein required for dehydratation of the spore core and assembly of the coat (SpoVS) OS=Bacillus sp. GeD10 GN=EBGED10_57380 PE=4 SV=1	N1M113		Stage V sporulation protein required for dehydratation of the spore core and assembly of the coat (SpoVS)	>tr|N1M113|N1M113_9BACI Stage V sporulation protein required for dehydratation of the spore core and assembly of the coat (SpoVS) OS=Bacillus sp. GeD10	EBGED10_57380
#N/A	N1LY71		bged02294	Asparagine--tRNA ligase	asnS	K01893		0.615456	1.32273	0.0475627		0	4.93512	4.92052	5.0569	4.92808	4.92317	4.52302	5.76779	5.88213	5.82881	5.83932	4.95276	5.56821	0.615456		0	323.31	55251000000	1321	45	45	45	463	463	52.939	88.3	1.32273	-0.615456	-2.33802	N1LY71	N1LY71	>tr|N1LY71|N1LY71_9BACI Asparagine--tRNA ligase OS=Bacillus sp. GeD10 GN=asnS PE=3 SV=1	N1LY71		Asparagine--tRNA ligase	>tr|N1LY71|N1LY71_9BACI Asparagine--tRNA ligase OS=Bacillus sp. GeD10	asnS
#N/A	N1LW63		#N/A	UPF0223 protein EBGED10	EBGED10_55540	#N/A		2.05866	1.3209	0.0477641		0	NaN	-5.01621	-4.17138	-3.65409	NaN	NaN	NaN	-2.72472	NaN	-1.71907	-4.28056	-2.2219	2.05866		0	14.173	293850000	10	4	4	4	89	89	10.845	52.8	1.3209	-2.05866	-3.2424	N1LW63	N1LW63	>tr|N1LW63|N1LW63_9BACI UPF0223 protein EBGED10_55540 OS=Bacillus sp. GeD10 GN=EBGED10_55540 PE=3 SV=1	N1LW63		UPF0223 protein EBGED10	>tr|N1LW63|N1LW63_9BACI UPF0223 protein EBGED10_55540 OS=Bacillus sp. GeD10	EBGED10_55540
#N/A	N1LIC2		bged00640	Long-chain-fatty-acid--CoA ligase	EBGED10_9860	K16093		-1.93568	1.31947	0.0479213		0	NaN	1.50113	1.10744	1.81032	0.705752	-1.50715	-2.18681	NaN	-0.0589055	1.1348	1.28116	-0.654515	-1.93568		0	18.245	1247700000	22	17	17	18	4960	4960	567.86	5.5	1.31947	1.93568	2.47821	N1LIC2	N1LIC2	>tr|N1LIC2|N1LIC2_9BACI Long-chain-fatty-acid--CoA ligase OS=Bacillus sp. GeD10 GN=EBGED10_9860 PE=4 SV=1	N1LIC2		Long-chain-fatty-acid--CoA ligase	>tr|N1LIC2|N1LIC2_9BACI Long-chain-fatty-acid--CoA ligase OS=Bacillus sp. GeD10	EBGED10_9860
#N/A	N1LXL2		#N/A	Phage capsid and scaffold	EBGED10_62070	K06904		0.771974	1.31559	0.0483517		0	NaN	-1.84163	-1.04219	-1.88021	-1.20566	NaN	NaN	-0.382107	-1.00725	-0.771986	-1.49242	-0.720449	0.771974		0	22.633	580690000	21	1	1	7	436	436	48.954	4.4	1.31559	-0.771974	-2.59825	N1LXL2	N1LXL2	>tr|N1LXL2|N1LXL2_9BACI Phage capsid and scaffold OS=Bacillus sp. GeD10 GN=EBGED10_62070 PE=4 SV=1	N1LXL2		Phage capsid and scaffold	>tr|N1LXL2|N1LXL2_9BACI Phage capsid and scaffold OS=Bacillus sp. GeD10	EBGED10_62070
#N/A	N1LRJ2		bged02192	50S ribosomal protein L5	rplE	K02931		-0.728422	1.31402	0.0485271		0	7.21129	6.07356	6.03745	6.21877	6.53797	4.94212	5.57654	5.62427	6.04246	6.25154	6.41581	5.68739	-0.728422		0	323.31	146410000000	1100	25	25	25	179	179	20.165	78.8	1.31402	0.728422	2.32516	N1LRJ2	N1LRJ2	>tr|N1LRJ2|N1LRJ2_9BACI 50S ribosomal protein L5 OS=Bacillus sp. GeD10 GN=rplE PE=3 SV=1	N1LRJ2		50S ribosomal protein L5	>tr|N1LRJ2|N1LRJ2_9BACI 50S ribosomal protein L5 OS=Bacillus sp. GeD10	rplE
#N/A	N1LLT8		bged01255	Transcriptional regulator, TetR family	EBGED10_6490	K13770		-1.39187	1.3113	0.0488314		0	NaN	-0.336533	NaN	NaN	1.04218	NaN	-0.72851	-1.36933	-0.744456	-1.31388	0.352825	-1.03904	-1.39187		0	13.092	930200000	19	3	3	3	191	191	21.88	28.3	1.3113	1.39187	2.7996	N1LLT8	N1LLT8	>tr|N1LLT8|N1LLT8_9BACI Transcriptional regulator, TetR family OS=Bacillus sp. GeD10 GN=EBGED10_6490 PE=4 SV=1	N1LLT8		Transcriptional regulator, TetR family	>tr|N1LLT8|N1LLT8_9BACI Transcriptional regulator, TetR family OS=Bacillus sp. GeD10	EBGED10_6490
#N/A	N1LVT1		#N/A	Uncharacterized protein	EBGED10_55460	#N/A		-0.557232	1.31113	0.0488509		0	-2.91102	-2.96675	-2.28334	-2.58297	-2.19043	NaN	NaN	-3.03322	-3.37018	-3.02899	-2.5869	-3.14413	-0.557232		0	14.059	235820000	17	3	3	3	130	130	14.984	39.2	1.31113	0.557232	2.46404	N1LVT1	N1LVT1	>tr|N1LVT1|N1LVT1_9BACI Uncharacterized protein OS=Bacillus sp. GeD10 GN=EBGED10_55460 PE=4 SV=1	N1LVT1		Uncharacterized protein	>tr|N1LVT1|N1LVT1_9BACI Uncharacterized protein OS=Bacillus sp. GeD10	EBGED10_55460
#N/A	N1LTI7		bged00146	Amidophosphoribosyltransferase	purF	K00764		0.476654	1.30826	0.0491747		0	4.67808	4.63368	4.59255	4.8731	4.58775	4.47648	5.68827	5.36066	5.09417	5.12883	4.67303	5.14968	0.476654		0	323.31	37120000000	832	27	27	27	471	471	51.39	71.8	1.30826	-0.476654	-2.31667	N1LTI7	N1LTI7	>tr|N1LTI7|N1LTI7_9BACI Amidophosphoribosyltransferase OS=Bacillus sp. GeD10 GN=purF PE=3 SV=1	N1LTI7		Amidophosphoribosyltransferase	>tr|N1LTI7|N1LTI7_9BACI Amidophosphoribosyltransferase OS=Bacillus sp. GeD10	purF
#N/A	N1LWB0		bged01488	Cell division protein ftsA	EBGED10_56090	K03590		0.646921	1.30711	0.0493051		0	-0.136467	-0.18033	0.316762	0.391745	0.332519	-0.185739	1.18869	1.1148	0.902326	0.938753	0.144846	0.791767	0.646921		0	323.31	1881200000	136	18	18	18	435	435	47.755	57	1.30711	-0.646921	-2.31497	N1LWB0	N1LWB0	>tr|N1LWB0|N1LWB0_9BACI Cell division protein ftsA OS=Bacillus sp. GeD10 GN=EBGED10_56090 PE=3 SV=1	N1LWB0		Cell division protein ftsA	>tr|N1LWB0|N1LWB0_9BACI Cell division protein ftsA OS=Bacillus sp. GeD10	EBGED10_56090
#N/A	N1LVS0		#N/A	CBS domain containing protein	EBGED10_55310	K18682		-1.11182	1.3066	0.0493631		0	-1.13364	-1.53291	-0.924561	-0.884334	-0.552529	-3.59152	-1.76425	-2.33962	-0.795398	-2.09627	-1.0056	-2.11742	-1.11182		0	103.06	729950000	42	4	4	4	147	147	16.746	49.7	1.3066	1.11182	2.31422	N1LVS0	N1LVS0	>tr|N1LVS0|N1LVS0_9BACI CBS domain containing protein OS=Bacillus sp. GeD10 GN=EBGED10_55310 PE=4 SV=1	N1LVS0		CBS domain containing protein	>tr|N1LVS0|N1LVS0_9BACI CBS domain containing protein OS=Bacillus sp. GeD10	EBGED10_55310
#N/A	N1LPA2		bged01268	Probable DNA-directed RNA polymerase subunit delta	rpoE	K03048		-0.680535	1.29974	0.0501485		0	2.59269	2.46176	2.18367	2.59056	2.73157	0.84105	1.76342	2.3526	1.80711	2.3934	2.51205	1.83152	-0.680535		0	323.31	9737600000	136	8	8	8	176	176	20.695	51.1	1.29974	0.680535	2.3041	N1LPA2	N1LPA2	>tr|N1LPA2|N1LPA2_9BACI Probable DNA-directed RNA polymerase subunit delta OS=Bacillus sp. GeD10 GN=rpoE PE=3 SV=1	N1LPA2		Probable DNA-directed RNA polymerase subunit delta	>tr|N1LPA2|N1LPA2_9BACI Probable DNA-directed RNA polymerase subunit delta OS=Bacillus sp. GeD10	rpoE
#N/A	N1LH29		bged00234	NtrC family Transcriptional regulator, ATPase domain	EBGED10_8020	K17473		1.00873	1.29419	0.050794		0	NaN	-2.31226	-3.04031	-3.59197	-2.92798	NaN	-2.85645	-1.83022	-1.81677	-1.33416	-2.96813	-1.9594	1.00873		0	50.257	158100000	24	9	9	9	891	891	102.25	14.1	1.29419	-1.00873	-2.43532	N1LH29	N1LH29	>tr|N1LH29|N1LH29_9BACI NtrC family Transcriptional regulator, ATPase domain OS=Bacillus sp. GeD10 GN=EBGED10_8020 PE=4 SV=1	N1LH29		NtrC family Transcriptional regulator, ATPase domain	>tr|N1LH29|N1LH29_9BACI NtrC family Transcriptional regulator, ATPase domain OS=Bacillus sp. GeD10	EBGED10_8020
#N/A	N1LR68		bged01543	Methylglyoxal synthase	mgsA	K01734		-0.667601	1.29371	0.0508501		0	0.326916	0.22249	-0.0331773	0.309537	0.420538	-0.112817	-0.13883	-0.761888	0.252733	-1.3309	0.249261	-0.41834	-0.667601		0	194.4	1949100000	61	7	7	7	131	131	14.685	75.6	1.29371	0.667601	2.2952	N1LR68	N1LR68	>tr|N1LR68|N1LR68_9BACI Methylglyoxal synthase OS=Bacillus sp. GeD10 GN=mgsA PE=3 SV=1	N1LR68		Methylglyoxal synthase	>tr|N1LR68|N1LR68_9BACI Methylglyoxal synthase OS=Bacillus sp. GeD10	mgsA
#N/A	N1LLZ8		bged00461	Translation initiation factor IF-1	infA	K02518		-0.628094	1.2872	0.0516184		0	3.62387	4.57329	4.22701	4.14475	4.70008	3.58664	2.90074	3.74366	3.79067	4.10682	4.2538	3.62571	-0.628094		0	216.35	27948000000	289	5	5	5	72	72	8.1855	77.8	1.2872	0.628093	2.2856	N1LLZ8	N1LLZ8	>tr|N1LLZ8|N1LLZ8_9BACI Translation initiation factor IF-1 OS=Bacillus sp. GeD10 GN=infA PE=3 SV=1	N1LLZ8		Translation initiation factor IF-1	>tr|N1LLZ8|N1LLZ8_9BACI Translation initiation factor IF-1 OS=Bacillus sp. GeD10	infA
#N/A	N1LQQ5		bged00531	Adenylate kinase	adk	K00939		-0.662224	1.2857	0.0517962		0	4.51212	4.47251	4.78597	4.76835	4.96077	2.96284	4.27776	4.45167	4.39337	4.10296	4.69994	4.03772	-0.662224		0	323.31	40687000000	859	21	21	21	216	216	23.755	91.7	1.2857	0.662224	2.28339	N1LQQ5	N1LQQ5	>tr|N1LQQ5|N1LQQ5_9BACI Adenylate kinase OS=Bacillus sp. GeD10 GN=adk PE=3 SV=1	N1LQQ5		Adenylate kinase	>tr|N1LQQ5|N1LQQ5_9BACI Adenylate kinase OS=Bacillus sp. GeD10	adk
#N/A	N1LHE9		bged01979	Release factor glutamine methyltransferase	prmC	K02493		0.914205	1.28091	0.052371		0	-2.09022	NaN	-2.39354	-1.47708	-1.57521	NaN	NaN	-1.10096	NaN	-0.83865	-1.88401	-0.969806	0.914205		0	111.48	458420000	14	4	4	4	283	283	32.151	25.1	1.28091	-0.914205	-2.73133	N1LHE9	N1LHE9	>tr|N1LHE9|N1LHE9_9BACI Release factor glutamine methyltransferase OS=Bacillus sp. GeD10 GN=prmC PE=3 SV=1	N1LHE9		Release factor glutamine methyltransferase	>tr|N1LHE9|N1LHE9_9BACI Release factor glutamine methyltransferase OS=Bacillus sp. GeD10	prmC
#N/A	N1LVW1		bged00203	16S rRNA (Guanine(966)-N(2))-methyltransferase		K08316		0.734326	1.27664	0.0528889		0	-3.12162	-3.46741	-2.78651	-2.47334	-2.50993	NaN	-2.06486	-2.5776	-1.76985	NaN	-2.87176	-2.13744	0.734326		0	65.341	418040000	26	9	9	9	188	188	20.625	55.9	1.27664	-0.734326	-2.40561	N1LVW1	N1LVW1	>tr|N1LVW1|N1LVW1_9BACI 16S rRNA (Guanine(966)-N(2))-methyltransferase ## SSU rRNA m(2)G966 OS=Bacillus sp. GeD10 GN=EBGED10_55860 PE=4 SV=1	N1LVW1		16S rRNA (Guanine(966)-N(2))-methyltransferase	>tr|N1LVW1|N1LVW1_9BACI 16S rRNA (Guanine(966)-N(2))-methyltransferase
#N/A	N1LTJ2		bged00532	Adenylosuccinate lyase	EBGED10_47360	K01756		0.699364	1.27487	0.0531045		0	5.11383	4.85819	4.99759	4.91325	4.88015	4.48331	6.06573	6.08396	6.01748	5.60937	4.9526	5.65197	0.699364		0	323.31	55156000000	1057	38	38	38	435	435	49.989	82.1	1.27487	-0.699364	-2.26741	N1LTJ2	N1LTJ2	>tr|N1LTJ2|N1LTJ2_9BACI Adenylosuccinate lyase OS=Bacillus sp. GeD10 GN=EBGED10_47360 PE=3 SV=1	N1LTJ2		Adenylosuccinate lyase	>tr|N1LTJ2|N1LTJ2_9BACI Adenylosuccinate lyase OS=Bacillus sp. GeD10	EBGED10_47360
#N/A	N1M032		bged00171	Cell division protein SepF	sepF	K09772		-0.451789	1.27408	0.0532014		0	0.316541	-0.0329952	0.27461	-0.0712681	0.296373	-0.698945	-0.681838	-0.0466764	-0.275811	0.227584	0.156652	-0.295137	-0.451789		0	117.96	2234800000	75	8	8	8	156	156	17.723	55.1	1.27408	0.451789	2.26624	N1M032	N1M032	>tr|N1M032|N1M032_9BACI Cell division protein SepF OS=Bacillus sp. GeD10 GN=sepF PE=3 SV=1	N1M032		Cell division protein SepF	>tr|N1M032|N1M032_9BACI Cell division protein SepF OS=Bacillus sp. GeD10	sepF
#N/A	N1LRF0		bged01309	23S rRNA (Guanosine-2-O-)-methyltransferase rlmB		K03218		0.427001	1.27195	0.0534626		0	2.93671	2.55746	2.77823	2.48888	2.70833	3.03207	2.5199	3.38856	3.16593	3.49815	2.69392	3.12092	0.427001		0	323.31	12331000000	231	17	17	17	247	247	27.017	78.5	1.27195	-0.427001	-2.26311	N1LRF0	N1LRF0	>tr|N1LRF0|N1LRF0_9BACI 23S rRNA (Guanosine-2-O-)-methyltransferase rlmB ## LSU rRNA Gm2251 OS=Bacillus sp. GeD10 GN=EBGED10_22550 PE=4 SV=1	N1LRF0		23S rRNA (Guanosine-2-O-)-methyltransferase rlmB	>tr|N1LRF0|N1LRF0_9BACI 23S rRNA (Guanosine-2-O-)-methyltransferase rlmB
#N/A	N1LQR1		#N/A	Cytochrome oxidase biogenesis protein Sco1/SenC/PrrC, putative copper metallochaperone	EBGED10_42900	K07152		-0.722134	1.26933	0.053786		0	-0.881917	-0.553969	NaN	-0.000766344	NaN	NaN	-1.25185	-1.41354	-0.730208	-1.40847	-0.478884	-1.20102	-0.722134		0	139.76	1006700000	19	6	6	6	195	195	22.33	40.5	1.26933	0.722134	2.51064	N1LQR1	N1LQR1	>tr|N1LQR1|N1LQR1_9BACI Cytochrome oxidase biogenesis protein Sco1/SenC/PrrC, putative copper metallochaperone OS=Bacillus sp. GeD10 GN=EBGED10_42900 PE=4 SV=1	N1LQR1		Cytochrome oxidase biogenesis protein Sco1/SenC/PrrC, putative copper metallochaperone	>tr|N1LQR1|N1LQR1_9BACI Cytochrome oxidase biogenesis protein Sco1/SenC/PrrC, putative copper metallochaperone OS=Bacillus sp. GeD10	EBGED10_42900
#N/A	N1M0C6		bged02645	Phosphoenolpyruvate-protein phosphotransferase	EBGED10_54630	K08483		0.499244	1.26721	0.0540491		0	4.88768	4.44958	4.47209	4.62485	4.73859	4.34644	5.36661	5.385	5.11156	5.45939	4.63456	5.1338	0.499244		0	323.31	35099000000	957	36	36	36	570	570	62.782	76.3	1.26721	-0.499244	-2.25611	N1M0C6	N1M0C6	>tr|N1M0C6|N1M0C6_9BACI Phosphoenolpyruvate-protein phosphotransferase OS=Bacillus sp. GeD10 GN=EBGED10_54630 PE=3 SV=1	N1M0C6		Phosphoenolpyruvate-protein phosphotransferase	>tr|N1M0C6|N1M0C6_9BACI Phosphoenolpyruvate-protein phosphotransferase OS=Bacillus sp. GeD10	EBGED10_54630
#N/A	N1LGS6		bged02118	Thiol peroxidase, Bcp-type	EBGED10_4040	K03564		-0.725102	1.26605	0.0541938		0	-0.00827317	0.484734	0.826846	1.12462	1.1916	-0.309568	-0.0918788	0.917377	-0.217456	-0.304455	0.723906	-0.00119614	-0.725102		0	227.68	2914500000	108	14	14	14	151	151	17.427	80.8	1.26605	0.725102	2.2544	N1LGS6	N1LGS6	>tr|N1LGS6|N1LGS6_9BACI Thiol peroxidase, Bcp-type OS=Bacillus sp. GeD10 GN=EBGED10_4040 PE=4 SV=1	N1LGS6		Thiol peroxidase, Bcp-type	>tr|N1LGS6|N1LGS6_9BACI Thiol peroxidase, Bcp-type OS=Bacillus sp. GeD10	EBGED10_4040
#N/A	N1LMJ4		bged02747	Acetyltransferase, GNAT family	EBGED10_31850	K06976		0.462988	1.26358	0.0545033		0	0.209808	0.435454	0.276362	0.359049	0.491013	0.0971322	0.796796	1.31179	0.947984	0.932928	0.354337	0.817326	0.462988		0	147.04	2279500000	165	16	16	16	277	277	31.404	63.5	1.26358	-0.462988	-2.25075	N1LMJ4	N1LMJ4	>tr|N1LMJ4|N1LMJ4_9BACI Acetyltransferase, GNAT family OS=Bacillus sp. GeD10 GN=EBGED10_31850 PE=4 SV=1	N1LMJ4		Acetyltransferase, GNAT family	>tr|N1LMJ4|N1LMJ4_9BACI Acetyltransferase, GNAT family OS=Bacillus sp. GeD10	EBGED10_31850
#N/A	N1LTL4		bged01316	Aspartyl/glutamyl-tRNA(Asn/Gln) amidotransferase subunit B	gatB	K02434		0.626267	1.26199	0.0547028		0	3.14825	2.99942	3.17921	3.15497	3.10158	2.71425	3.98682	4.17692	3.63228	4.20451	3.11669	3.74296	0.626267		0	323.31	16995000000	554	37	37	37	475	475	53.237	75.8	1.26199	-0.626267	-2.24841	N1LTL4	N1LTL4	>tr|N1LTL4|N1LTL4_9BACI Aspartyl/glutamyl-tRNA(Asn/Gln) amidotransferase subunit B OS=Bacillus sp. GeD10 GN=gatB PE=3 SV=1	N1LTL4		Aspartyl/glutamyl-tRNA(Asn/Gln) amidotransferase subunit B	>tr|N1LTL4|N1LTL4_9BACI Aspartyl/glutamyl-tRNA(Asn/Gln) amidotransferase subunit B OS=Bacillus sp. GeD10	gatB
#N/A	N1LNU2		#N/A	Iron(III) dicitrate transport system, periplasmic iron-binding protein FecB (TC 3.A.1.14.1)	EBGED10_16300	K02016		0.699944	1.26021	0.0549269		0	-0.85073	-0.680285	-0.0802064	-0.308875	-0.601825	-0.861284	0.125511	0.681948	0.497205	0.534418	-0.504384	0.19556	0.699944		0	279.27	1946100000	64	11	11	11	322	322	36.416	44.4	1.26021	-0.699944	-2.24579	N1LNU2	N1LNU2	>tr|N1LNU2|N1LNU2_9BACI Iron(III) dicitrate transport system, periplasmic iron-binding protein FecB (TC 3.A.1.14.1) OS=Bacillus sp. GeD10 GN=EBGED10_16300 PE=4 SV=1	N1LNU2		Iron(III) dicitrate transport system, periplasmic iron-binding protein FecB (TC 3.A.1.14.1)	>tr|N1LNU2|N1LNU2_9BACI Iron(III) dicitrate transport system, periplasmic iron-binding protein FecB (TC 3.A.1.14.1) OS=Bacillus sp. GeD10	EBGED10_16300
#N/A	N1LUH6		bged00965	Cell division initiation protein DivIVA	EBGED10_56200	K04074		-0.769411	1.25939	0.0550318		0	2.10387	3.02161	3.20327	3.51585	3.27826	1.52511	2.29784	2.80604	1.92521	2.72162	3.02457	2.25516	-0.769411		0	323.31	15726000000	314	16	16	16	168	168	19.744	64.3	1.25939	0.769411	2.24457	N1LUH6	N1LUH6	>tr|N1LUH6|N1LUH6_9BACI Cell division initiation protein DivIVA OS=Bacillus sp. GeD10 GN=EBGED10_56200 PE=4 SV=1	N1LUH6		Cell division initiation protein DivIVA	>tr|N1LUH6|N1LUH6_9BACI Cell division initiation protein DivIVA OS=Bacillus sp. GeD10	EBGED10_56200
#N/A	N1LDS2		bged00160	Ribose-phosphate pyrophosphokinase	prs	K00948		-0.584601	1.25768	0.0552479		0	4.20984	4.14463	3.9791	4.07809	4.31776	2.5812	3.64852	3.93402	3.66112	3.98155	4.14588	3.56128	-0.584601		0	323.31	27890000000	724	22	22	22	317	317	34.836	72.6	1.25768	0.584601	2.24206	N1LDS2	N1LDS2	>tr|N1LDS2|N1LDS2_9BACI Ribose-phosphate pyrophosphokinase OS=Bacillus sp. GeD10 GN=prs PE=3 SV=1	N1LDS2		Ribose-phosphate pyrophosphokinase	>tr|N1LDS2|N1LDS2_9BACI Ribose-phosphate pyrophosphokinase OS=Bacillus sp. GeD10	prs
#N/A	N1M1N7		bged02149	Oligopeptide ABC transporter, periplasmic oligopeptide-binding protein OppA (TC 3.A.1.5.1)	EBGED10_59330	K02035		0.503894	1.24187	0.0572963		0	2.01269	1.65513	2.27612	2.22523	2.20393	2.03672	2.26974	2.86513	2.59431	3.12667	2.07462	2.57851	0.503894		0	323.31	6027900000	277	30	30	33	551	551	62.411	53.4	1.24187	-0.503894	-2.21872	N1M1N7	N1M1N7	>tr|N1M1N7|N1M1N7_9BACI Oligopeptide ABC transporter, periplasmic oligopeptide-binding protein OppA (TC 3.A.1.5.1) OS=Bacillus sp. GeD10 GN=EBGED10_59330 PE=4 SV=1	N1M1N7		Oligopeptide ABC transporter, periplasmic oligopeptide-binding protein OppA (TC 3.A.1.5.1)	>tr|N1M1N7|N1M1N7_9BACI Oligopeptide ABC transporter, periplasmic oligopeptide-binding protein OppA (TC 3.A.1.5.1) OS=Bacillus sp. GeD10	EBGED10_59330
#N/A	N1LF41		#N/A	Uncharacterized protein	EBGED10_1190	#N/A		-0.695047	1.24034	0.0574988		0	-2.49227	-2.03984	-2.01831	-2.47136	-1.74802	-3.88663	-2.73451	-2.7657	-2.19894	-2.65928	-2.15396	-2.84901	-0.695047		0	90.892	360470000	33	2	2	2	108	108	12.43	26.9	1.24034	0.695047	2.21646	N1LF41	N1LF41	>tr|N1LF41|N1LF41_9BACI Uncharacterized protein OS=Bacillus sp. GeD10 GN=EBGED10_1190 PE=4 SV=1	N1LF41		Uncharacterized protein	>tr|N1LF41|N1LF41_9BACI Uncharacterized protein OS=Bacillus sp. GeD10	EBGED10_1190
#N/A	N1LPG8		bged00074	Histidine kinase	EBGED10_32290	K03407		1.15103	1.23991	0.0575553		0	-0.498315	-0.524431	-0.329823	-0.651723	-0.062713	-1.12064	0.418437	1.44874	1.30553	1.63609	-0.413401	0.737634	1.15103		0	323.31	1419700000	118	21	21	21	672	672	74.811	38.8	1.23991	-1.15103	-2.21583	N1LPG8	N1LPG8	>tr|N1LPG8|N1LPG8_9BACI Histidine kinase OS=Bacillus sp. GeD10 GN=EBGED10_32290 PE=4 SV=1	N1LPG8		Histidine kinase	>tr|N1LPG8|N1LPG8_9BACI Histidine kinase OS=Bacillus sp. GeD10	EBGED10_32290
#N/A	N1LSX8		#N/A	EPSX protein	EBGED10_45060	#N/A		1.11517	1.23739	0.0578913		0	-3.91438	-4.65312	-3.20536	-4.06336	-3.43805	-4.33802	-2.33642	-2.47325	-2.81552	-1.73523	-3.85485	-2.73969	1.11517		0	43.917	222120000	33	7	7	7	276	276	30.427	33.7	1.23739	-1.11517	-2.2121	N1LSX8	N1LSX8	>tr|N1LSX8|N1LSX8_9BACI EPSX protein OS=Bacillus sp. GeD10 GN=EBGED10_45060 PE=4 SV=1	N1LSX8		EPSX protein	>tr|N1LSX8|N1LSX8_9BACI EPSX protein OS=Bacillus sp. GeD10	EBGED10_45060
#N/A	N1LUR4		#N/A	Uncharacterized protein	EBGED10_51520	#N/A		-0.955838	1.23286	0.0584976		0	NaN	-3.51621	NaN	-2.96028	-2.39156	NaN	-4.23508	-3.80693	-3.69355	NaN	-2.95602	-3.91185	-0.955838		0	7.0472	139060000	14	2	2	2	145	145	16.407	15.9	1.23286	0.955838	2.62491	N1LUR4	N1LUR4	>tr|N1LUR4|N1LUR4_9BACI Uncharacterized protein OS=Bacillus sp. GeD10 GN=EBGED10_51520 PE=4 SV=1	N1LUR4		Uncharacterized protein	>tr|N1LUR4|N1LUR4_9BACI Uncharacterized protein OS=Bacillus sp. GeD10	EBGED10_51520
#N/A	N1LRH7		bged02981	Octanoyltransferase LipM	lipM	K03800		-0.780755	1.23134	0.0587025		0	1.12031	1.50555	1.53851	1.60014	1.47546	-0.657193	1.2669	0.739169	0.857837	1.12947	1.44799	0.667237	-0.780755		0	128.19	2593200000	115	10	10	10	278	278	32.104	52.9	1.23134	0.780755	2.20318	N1LRH7	N1LRH7	>tr|N1LRH7|N1LRH7_9BACI Octanoyltransferase LipM OS=Bacillus sp. GeD10 GN=lipM PE=3 SV=1	N1LRH7		Octanoyltransferase LipM	>tr|N1LRH7|N1LRH7_9BACI Octanoyltransferase LipM OS=Bacillus sp. GeD10	lipM
#N/A	N1M019		bged00163	UDP-N-acetylmuramoyl-L-alanyl-D-glutamate--2,6-diaminopimelate ligase	murE	K01928		0.535193	1.22769	0.0591986		0	0.584844	0.669992	1.32988	1.22436	1.37214	0.916906	1.54087	1.84055	1.66679	1.89206	1.03624	1.57144	0.535193		0	231.71	2949200000	280	23	23	23	491	491	53.711	64.6	1.22769	-0.535193	-2.19778	N1M019	N1M019	>tr|N1M019|N1M019_9BACI UDP-N-acetylmuramoyl-L-alanyl-D-glutamate--2,6-diaminopimelate ligase OS=Bacillus sp. GeD10 GN=murE PE=3 SV=1	N1M019		UDP-N-acetylmuramoyl-L-alanyl-D-glutamate--2,6-diaminopimelate ligase	>tr|N1M019|N1M019_9BACI UDP-N-acetylmuramoyl-L-alanyl-D-glutamate--2,6-diaminopimelate ligase OS=Bacillus sp. GeD10	murE
#N/A	N1LJ20		#N/A	Petrobactin ABC transporter, periplasmic binding protein	EBGED10_12770	K02016		0.986277	1.22744	0.0592331		0	-0.23316	-0.513989	0.312212	0.260266	0.670396	-0.468783	1.22362	1.40632	1.57056	1.69539	0.0991449	1.08542	0.986277		0	323.31	3761200000	131	20	20	20	338	338	36.628	74.3	1.22744	-0.986277	-2.19741	N1LJ20	N1LJ20	>tr|N1LJ20|N1LJ20_9BACI Petrobactin ABC transporter, periplasmic binding protein OS=Bacillus sp. GeD10 GN=EBGED10_12770 PE=4 SV=1	N1LJ20		Petrobactin ABC transporter, periplasmic binding protein	>tr|N1LJ20|N1LJ20_9BACI Petrobactin ABC transporter, periplasmic binding protein OS=Bacillus sp. GeD10	EBGED10_12770
#N/A	N1LPD6		bged00951	Cold shock protein CspD	EBGED10_31940	K03704		-0.971602	1.22475	0.0596011		0	6.46152	5.89567	4.70003	4.39954	5.58433	3.92616	4.04763	4.27316	4.85902	5.0771	5.40822	4.43661	-0.971602		0	323.31	74529000000	2320	4	4	5	66	66	7.366	80.3	1.22475	0.971602	2.19343	N1LPD6	N1LPD6	>tr|N1LPD6|N1LPD6_9BACI Cold shock protein CspD OS=Bacillus sp. GeD10 GN=EBGED10_31940 PE=4 SV=1	N1LPD6		Cold shock protein CspD	>tr|N1LPD6|N1LPD6_9BACI Cold shock protein CspD OS=Bacillus sp. GeD10	EBGED10_31940
#N/A	N1LGA0		bged03356	Uncharacterized protein	EBGED10_11520	#N/A		-0.507959	1.22294	0.0598488		0	-2.9943	-2.80826	NaN	-2.51875	-2.07475	-3.37371	-3.44505	-2.90843	-2.83543	-2.97226	-2.59902	-3.10697	-0.507959		0	61.624	279850000	22	4	4	4	112	112	12.834	41.1	1.22294	0.507959	2.24259	N1LGA0	N1LGA0	>tr|N1LGA0|N1LGA0_9BACI Uncharacterized protein OS=Bacillus sp. GeD10 GN=EBGED10_11520 PE=4 SV=1	N1LGA0		Uncharacterized protein	>tr|N1LGA0|N1LGA0_9BACI Uncharacterized protein OS=Bacillus sp. GeD10	EBGED10_11520
#N/A	N1M039		bged02431	Aspartate carbamoyltransferase	pyrB	K00609		0.420748	1.22273	0.0598779		0	1.63572	1.53794	1.20922	2.02668	2.21023	2.34008	1.9396	2.24168	2.0339	2.16827	1.72396	2.14471	0.420748		0	323.31	6029500000	222	18	18	18	304	304	34.722	60.9	1.22273	-0.420748	-2.19046	N1M039	N1M039	>tr|N1M039|N1M039_9BACI Aspartate carbamoyltransferase OS=Bacillus sp. GeD10 GN=pyrB PE=3 SV=1	N1M039		Aspartate carbamoyltransferase	>tr|N1M039|N1M039_9BACI Aspartate carbamoyltransferase OS=Bacillus sp. GeD10	pyrB
#N/A	N1LSW9		bged01169	UDP-glucuronate 5-epimerase	EBGED10_44960	K08679		0.884786	1.21983	0.0602798		0	-2.37931	-3.0897	-2.40935	-1.93109	-1.57929	-2.39842	-0.959728	-0.996031	-0.753287	-1.85734	-2.27775	-1.39296	0.884786		0	46.601	461050000	50	7	7	7	333	333	37.941	29.7	1.21983	-0.884786	-2.18617	N1LSW9	N1LSW9	>tr|N1LSW9|N1LSW9_9BACI UDP-glucuronate 5-epimerase OS=Bacillus sp. GeD10 GN=EBGED10_44960 PE=4 SV=1	N1LSW9		UDP-glucuronate 5-epimerase	>tr|N1LSW9|N1LSW9_9BACI UDP-glucuronate 5-epimerase OS=Bacillus sp. GeD10	EBGED10_44960
#N/A	N1LSI9		#N/A	DUF1694 domain-containing protein	EBGED10_43290	K02113		-0.989133	1.21845	0.0604716		0	-1.86748	NaN	NaN	-1.41518	-1.01493	-2.96098	-2.34265	NaN	-1.96136	NaN	-1.43253	-2.42166	-0.989133		0	57.869	516920000	20	5	5	5	130	130	14.823	60	1.21845	0.989133	2.59333	N1LSI9	N1LSI9	>tr|N1LSI9|N1LSI9_9BACI DUF1694 domain-containing protein OS=Bacillus sp. GeD10 GN=EBGED10_43290 PE=4 SV=1	N1LSI9		DUF1694 domain-containing protein	>tr|N1LSI9|N1LSI9_9BACI DUF1694 domain-containing protein OS=Bacillus sp. GeD10	EBGED10_43290
#N/A	N1LQZ9		bged01020	UDP-N-acetylmuramoyl-tripeptide--D-alanyl-D-alanine ligase	EBGED10_21010	K01929		0.743737	1.2131	0.0612203		0	-0.151348	0.320055	0.670154	0.533333	0.590112	0.119247	1.34699	1.93819	0.840724	1.43584	0.392461	1.1362	0.743737		0	320.66	2576200000	155	21	21	21	458	458	50.445	67	1.2131	-0.743737	-2.17624	N1LQZ9	N1LQZ9	>tr|N1LQZ9|N1LQZ9_9BACI UDP-N-acetylmuramoyl-tripeptide--D-alanyl-D-alanine ligase OS=Bacillus sp. GeD10 GN=EBGED10_21010 PE=3 SV=1	N1LQZ9		UDP-N-acetylmuramoyl-tripeptide--D-alanyl-D-alanine ligase	>tr|N1LQZ9|N1LQZ9_9BACI UDP-N-acetylmuramoyl-tripeptide--D-alanyl-D-alanine ligase OS=Bacillus sp. GeD10	EBGED10_21010
#N/A	N1LUI6		#N/A	UPF0473 protein EBGED10	EBGED10_50190	K00928		-1.02535	1.21052	0.0615852		0	0.0136378	1.14649	1.59567	1.97923	1.73585	0.385505	0.857081	0.886976	0.0663443	-0.85176	1.29418	0.268829	-1.02535		0	60.045	3973900000	143	5	5	5	92	92	10.598	29.3	1.21052	1.02535	2.17243	N1LUI6	N1LUI6	>tr|N1LUI6|N1LUI6_9BACI UPF0473 protein EBGED10_50190 OS=Bacillus sp. GeD10 GN=EBGED10_50190 PE=3 SV=1	N1LUI6		UPF0473 protein EBGED10	>tr|N1LUI6|N1LUI6_9BACI UPF0473 protein EBGED10_50190 OS=Bacillus sp. GeD10	EBGED10_50190
#N/A	N1LUF6		bged00243	Holliday junction ATP-dependent DNA helicase RuvA	ruvA	K03550		0.611096	1.20869	0.0618451		0	-0.499522	-0.779884	-0.119441	0.0958554	0.072028	1.07238	-0.123178	-0.0243241	0.671753	0.227889	-0.246193	0.364904	0.611096		0	131.74	1464700000	66	8	8	8	205	205	23.165	46.3	1.20869	-0.611096	-2.16972	N1LUF6	N1LUF6	>tr|N1LUF6|N1LUF6_9BACI Holliday junction ATP-dependent DNA helicase RuvA OS=Bacillus sp. GeD10 GN=ruvA PE=3 SV=1	N1LUF6		Holliday junction ATP-dependent DNA helicase RuvA	>tr|N1LUF6|N1LUF6_9BACI Holliday junction ATP-dependent DNA helicase RuvA OS=Bacillus sp. GeD10	ruvA
#N/A	N1LKE3		bged03103	Predicted oxidoreductase	EBGED10_24590	K05882		0.958991	1.20226	0.0627687		0	NaN	NaN	-1.94895	-2.18383	-1.33461	NaN	NaN	-0.373343	-0.886777	-1.33029	-1.82246	-0.863471	0.958991		0	146.23	694270000	22	8	8	8	304	304	34.875	35.2	1.20226	-0.958991	-2.55803	N1LKE3	N1LKE3	>tr|N1LKE3|N1LKE3_9BACI Predicted oxidoreductase OS=Bacillus sp. GeD10 GN=EBGED10_24590 PE=4 SV=1	N1LKE3		Predicted oxidoreductase	>tr|N1LKE3|N1LKE3_9BACI Predicted oxidoreductase OS=Bacillus sp. GeD10	EBGED10_24590
#N/A	N1LP89		bged00267	Single-stranded DNA-binding protein	EBGED10_17700	K03111		-0.450678	1.20069	0.0629961		0	4.34558	4.29395	4.41107	3.98403	4.24648	3.60271	4.20627	3.41914	4.34478	3.45482	4.25622	3.80554	-0.450678		0	323.31	25290000000	255	14	14	14	169	169	18.363	83.4	1.20069	0.450678	2.15789	N1LP89	N1LP89	>tr|N1LP89|N1LP89_9BACI Single-stranded DNA-binding protein OS=Bacillus sp. GeD10 GN=EBGED10_17700 PE=3 SV=1	N1LP89		Single-stranded DNA-binding protein	>tr|N1LP89|N1LP89_9BACI Single-stranded DNA-binding protein OS=Bacillus sp. GeD10	EBGED10_17700
#N/A	N1LIR4		bged02908	Alkanesulfonate monooxygenase	ssuD	K04091		-0.361842	1.20041	0.0630365		0	2.10795	1.31458	1.90278	1.95623	1.90481	1.19768	1.36458	1.78972	1.48004	1.54512	1.83727	1.47543	-0.361842		0	206.12	4657700000	121	13	13	13	370	370	41.115	56.2	1.20041	0.361842	2.15748	N1LIR4	N1LIR4	>tr|N1LIR4|N1LIR4_9BACI Alkanesulfonate monooxygenase OS=Bacillus sp. GeD10 GN=ssuD PE=3 SV=1	N1LIR4		Alkanesulfonate monooxygenase	>tr|N1LIR4|N1LIR4_9BACI Alkanesulfonate monooxygenase OS=Bacillus sp. GeD10	ssuD
#N/A	N1LSX0		bged03126	Virulence factor MviM	EBGED10_50550	K03810		0.751043	1.20013	0.0630762		0	-1.3388	NaN	-0.766694	-0.645688	-1.47646	-0.629069	-0.450553	0.062139	0.460587	-0.972441	-1.05691	-0.305867	0.751043		0	71.684	795970000	26	6	6	6	308	308	35.179	35.7	1.20013	-0.751043	-2.207	N1LSX0	N1LSX0	>tr|N1LSX0|N1LSX0_9BACI Virulence factor MviM OS=Bacillus sp. GeD10 GN=EBGED10_50550 PE=4 SV=1	N1LSX0		Virulence factor MviM	>tr|N1LSX0|N1LSX0_9BACI Virulence factor MviM OS=Bacillus sp. GeD10	EBGED10_50550
#N/A	N1LJU1		bged00438	30S ribosomal protein S19	rpsS	K02965		-0.712278	1.2	0.0630961		0	4.70909	4.66046	4.49709	4.32141	4.46182	2.61008	3.70542	4.26952	4.3761	4.12735	4.52997	3.8177	-0.712278		0	323.31	45842000000	481	11	11	11	92	92	10.628	82.6	1.2	0.712278	2.15687	N1LJU1	N1LJU1	>tr|N1LJU1|N1LJU1_9BACI 30S ribosomal protein S19 OS=Bacillus sp. GeD10 GN=rpsS PE=3 SV=1	N1LJU1		30S ribosomal protein S19	>tr|N1LJU1|N1LJU1_9BACI 30S ribosomal protein S19 OS=Bacillus sp. GeD10	rpsS
#N/A	N1LVM9		bged00483	Glutamine-dependent 2-keto-4-methylthiobutyrate transaminase	EBGED10_54760	K08969		0.880227	1.19964	0.0631477		0	-2.57009	-1.62294	-1.46811	-1.02973	-1.06981	-1.38586	NaN	-0.189107	-0.832695	-0.279981	-1.55214	-0.67191	0.880227		0	42.787	954530000	45	6	6	6	392	392	43.055	27.8	1.19964	-0.880228	-2.20623	N1LVM9	N1LVM9	>tr|N1LVM9|N1LVM9_9BACI Glutamine-dependent 2-keto-4-methylthiobutyrate transaminase OS=Bacillus sp. GeD10 GN=EBGED10_54760 PE=4 SV=1	N1LVM9		Glutamine-dependent 2-keto-4-methylthiobutyrate transaminase	>tr|N1LVM9|N1LVM9_9BACI Glutamine-dependent 2-keto-4-methylthiobutyrate transaminase OS=Bacillus sp. GeD10	EBGED10_54760
#N/A	N1LTP2		bged00706	Phosphoribosylformylglycinamidine synthase subunit PurS	purS	K01952		-0.584884	1.1967	0.0635768		0	5.07982	4.13539	3.88795	4.44357	4.28524	3.34832	3.97866	4.22365	4.0178	3.33912	4.36639	3.78151	-0.584884		0	305.12	37057000000	350	10	10	10	84	84	9.574	84.5	1.1967	0.584884	2.152	N1LTP2	N1LTP2	>tr|N1LTP2|N1LTP2_9BACI Phosphoribosylformylglycinamidine synthase subunit PurS OS=Bacillus sp. GeD10 GN=purS PE=3 SV=1	N1LTP2		Phosphoribosylformylglycinamidine synthase subunit PurS	>tr|N1LTP2|N1LTP2_9BACI Phosphoribosylformylglycinamidine synthase subunit PurS OS=Bacillus sp. GeD10	purS
#N/A	N1LJX0		bged00425	30S ribosomal protein S9	rpsI	K02996		-0.624225	1.19658	0.063594		0	6.26448	5.94508	6.18182	5.26166	6.04251	5.45981	4.95616	4.72307	6.05249	5.38288	5.93911	5.31488	-0.624225		0	323.31	105450000000	421	9	9	9	130	130	14.491	70.8	1.19658	0.624225	2.15183	N1LJX0	N1LJX0	>tr|N1LJX0|N1LJX0_9BACI 30S ribosomal protein S9 OS=Bacillus sp. GeD10 GN=rpsI PE=3 SV=1	N1LJX0		30S ribosomal protein S9	>tr|N1LJX0|N1LJX0_9BACI 30S ribosomal protein S9 OS=Bacillus sp. GeD10	rpsI
#N/A	N1LUP0		bged00919	Uridylate kinase	pyrH	K09903		-0.654623	1.19132	0.0643699		0	3.14996	2.82348	2.37577	2.73775	2.75617	1.11669	2.03306	2.69956	2.14227	2.57843	2.76863	2.114	-0.654623		0	323.31	11251000000	355	13	13	13	240	240	25.9	75.8	1.19132	0.654623	2.14404	N1LUP0	N1LUP0	>tr|N1LUP0|N1LUP0_9BACI Uridylate kinase OS=Bacillus sp. GeD10 GN=pyrH PE=3 SV=1	N1LUP0		Uridylate kinase	>tr|N1LUP0|N1LUP0_9BACI Uridylate kinase OS=Bacillus sp. GeD10	pyrH
#N/A	N1LWC2		bged02912	FMN-dependent NADH-azoreductase	azoR	K01118		-0.492791	1.18836	0.0648097		0	2.57911	2.16904	2.39734	2.57665	2.54426	1.29287	1.94522	1.98346	1.92072	2.66018	2.45328	1.96049	-0.492791		0	321.31	10368000000	274	11	11	11	211	211	22.931	86.3	1.18836	0.492791	2.13967	N1LWC2	N1LWC2	>tr|N1LWC2|N1LWC2_9BACI FMN-dependent NADH-azoreductase OS=Bacillus sp. GeD10 GN=azoR PE=3 SV=1	N1LWC2		FMN-dependent NADH-azoreductase	>tr|N1LWC2|N1LWC2_9BACI FMN-dependent NADH-azoreductase OS=Bacillus sp. GeD10	azoR
#N/A	N1LSS7		bged02996	Cytochrome d ubiquinol oxidase subunit I	EBGED10_44410	K00425		1.88146	1.18785	0.0648852		0	-3.33195	NaN	-1.52298	NaN	-1.74637	-1.49766	-0.940903	NaN	0.343806	0.818867	-2.20043	-0.318972	1.88146		0	39.723	323870000	19	6	6	6	449	449	50.966	16.7	1.18785	-1.88146	-2.35833	N1LSS7	N1LSS7	>tr|N1LSS7|N1LSS7_9BACI Cytochrome d ubiquinol oxidase subunit I OS=Bacillus sp. GeD10 GN=EBGED10_44410 PE=4 SV=1	N1LSS7		Cytochrome d ubiquinol oxidase subunit I	>tr|N1LSS7|N1LSS7_9BACI Cytochrome d ubiquinol oxidase subunit I OS=Bacillus sp. GeD10	EBGED10_44410
#N/A	N1LMY5		#N/A	Uncharacterized protein	EBGED10_26480	#N/A		-0.848496	1.1842	0.0654338		0	0.828768	-1.16875	-0.915217	-0.0394505	-0.685855	-0.985535	-1.64369	-0.716103	-1.48475	-1.3929	-0.3961	-1.2446	-0.848496		0	89.093	1172500000	45	6	6	6	258	258	30.239	30.6	1.1842	0.848496	2.13352	N1LMY5	N1LMY5	>tr|N1LMY5|N1LMY5_9BACI Uncharacterized protein OS=Bacillus sp. GeD10 GN=EBGED10_26480 PE=4 SV=1	N1LMY5		Uncharacterized protein	>tr|N1LMY5|N1LMY5_9BACI Uncharacterized protein OS=Bacillus sp. GeD10	EBGED10_26480
#N/A	N1LMV6		bged01904	COG0488: ATPase components of ABC transporters with duplicated ATPase domains	EBGED10_32850	K15738		0.717946	1.18291	0.0656281		0	-0.200639	0.364441	0.43688	0.718093	0.733385	0.115357	0.871028	1.4499	1.44844	1.75717	0.410432	1.12838	0.717946		0	290.81	1781000000	169	23	23	23	631	631	71.655	49.3	1.18291	-0.717946	-2.13161	N1LMV6	N1LMV6	>tr|N1LMV6|N1LMV6_9BACI COG0488: ATPase components of ABC transporters with duplicated ATPase domains OS=Bacillus sp. GeD10 GN=EBGED10_32850 PE=3 SV=1	N1LMV6		COG0488: ATPase components of ABC transporters with duplicated ATPase domains	>tr|N1LMV6|N1LMV6_9BACI COG0488: ATPase components of ABC transporters with duplicated ATPase domains OS=Bacillus sp. GeD10	EBGED10_32850
#N/A	N1LZQ6		bged00724	Phosphotransferase system, phosphocarrier protein HPr	EBGED10_54620	K11189		-0.604656	1.18021	0.0660367		0	4.30055	3.66657	4.08167	4.52442	4.48685	4.18978	3.68366	2.88384	3.99276	3.28674	4.21201	3.60736	-0.604656		0	323.31	33466000000	173	7	7	7	87	87	9.2384	93.1	1.18021	0.604656	2.12762	N1LZQ6	N1LZQ6	>tr|N1LZQ6|N1LZQ6_9BACI Phosphotransferase system, phosphocarrier protein HPr OS=Bacillus sp. GeD10 GN=EBGED10_54620 PE=4 SV=1	N1LZQ6		Phosphotransferase system, phosphocarrier protein HPr	>tr|N1LZQ6|N1LZQ6_9BACI Phosphotransferase system, phosphocarrier protein HPr OS=Bacillus sp. GeD10	EBGED10_54620
#N/A	N1LMG2		bged00670	Exonuclease SbcC	EBGED10_11800	K03546		0.622021	1.17756	0.0664415		0	1.59799	1.98155	2.11961	2.14505	2.45897	1.79216	2.79687	2.51559	3.00055	3.3081	2.06063	2.68266	0.622021		0	223.79	4460100000	192	25	25	25	1029	1029	120.38	31.6	1.17756	-0.622021	-2.1237	N1LMG2	N1LMG2	>tr|N1LMG2|N1LMG2_9BACI Exonuclease SbcC OS=Bacillus sp. GeD10 GN=EBGED10_11800 PE=4 SV=1	N1LMG2		Exonuclease SbcC	>tr|N1LMG2|N1LMG2_9BACI Exonuclease SbcC OS=Bacillus sp. GeD10	EBGED10_11800
#N/A	N1LUE2		#N/A	Uncharacterized protein	EBGED10_55850	#N/A		-0.940829	1.17676	0.0665647		0	1.29623	1.55392	2.57988	0.668582	2.1529	0	1.12374	0.479921	1.62344	0.320265	1.6503	0.709473	-0.940829		0	224.25	4182100000	150	9	9	9	129	129	14.968	71.3	1.17676	0.940829	2.12251	N1LUE2	N1LUE2	>tr|N1LUE2|N1LUE2_9BACI Uncharacterized protein OS=Bacillus sp. GeD10 GN=EBGED10_55850 PE=4 SV=1	N1LUE2		Uncharacterized protein	>tr|N1LUE2|N1LUE2_9BACI Uncharacterized protein OS=Bacillus sp. GeD10	EBGED10_55850
#N/A	N1LZR8		#N/A	Uncharacterized protein	EBGED10_52930	#N/A		-0.487868	1.17586	0.0667025		0	-0.297111	-0.0689383	-0.560593	-0.249476	0.130067	-0.930051	-1.26261	-0.535169	-0.684909	-0.0726484	-0.20921	-0.697078	-0.487868		0	172.59	2101300000	69	10	10	10	106	106	11.795	96.2	1.17586	0.487868	2.12118	N1LZR8	N1LZR8	>tr|N1LZR8|N1LZR8_9BACI Uncharacterized protein OS=Bacillus sp. GeD10 GN=EBGED10_52930 PE=4 SV=1	N1LZR8		Uncharacterized protein	>tr|N1LZR8|N1LZR8_9BACI Uncharacterized protein OS=Bacillus sp. GeD10	EBGED10_52930
#N/A	N1LNK6		#N/A	Metallo-beta-lactamase family protein	EBGED10_30510	K01069		0.926672	1.17309	0.0671297		0	-3.93948	-3.68522	-2.73054	-2.8988	-3.07999	-2.88806	NaN	-3.1112	-1.69187	-1.66941	-3.26681	-2.34014	0.926672		0	24.806	246110000	17	5	5	5	323	323	36.567	22.9	1.17309	-0.926672	-2.16481	N1LNK6	N1LNK6	>tr|N1LNK6|N1LNK6_9BACI Metallo-beta-lactamase family protein OS=Bacillus sp. GeD10 GN=EBGED10_30510 PE=4 SV=1	N1LNK6		Metallo-beta-lactamase family protein	>tr|N1LNK6|N1LNK6_9BACI Metallo-beta-lactamase family protein OS=Bacillus sp. GeD10	EBGED10_30510
#N/A	N1LXM6		bged02259	Phosphoribosylformylglycinamidine synthase subunit PurL	purL	K01952		0.527182	1.17216	0.0672726		0	6.2292	6.07441	6.2419	6.27206	6.54602	5.88643	7.01158	6.85699	6.99078	7.25372	6.27272	6.7999	0.527182		0	323.31	95805000000	1902	47	47	47	739	739	80.22	80.1	1.17216	-0.527182	-2.11571	N1LXM6	N1LXM6	>tr|N1LXM6|N1LXM6_9BACI Phosphoribosylformylglycinamidine synthase subunit PurL OS=Bacillus sp. GeD10 GN=purL PE=3 SV=1	N1LXM6		Phosphoribosylformylglycinamidine synthase subunit PurL	>tr|N1LXM6|N1LXM6_9BACI Phosphoribosylformylglycinamidine synthase subunit PurL OS=Bacillus sp. GeD10	purL
#N/A	N1LQ25		bged02784	Acetyltransferase, GNAT family	EBGED10_20640	K00680		-0.737046	1.17156	0.0673653		0	-2.95294	-3.14744	-2.53333	-2.79954	-2.22613	-4.57339	-3.26765	-3.25017	-2.69924	-3.55417	-2.73188	-3.46892	-0.737046		0	8.1468	250800000	12	3	3	3	167	167	18.954	18	1.17156	0.737046	2.11483	N1LQ25	N1LQ25	>tr|N1LQ25|N1LQ25_9BACI Acetyltransferase, GNAT family OS=Bacillus sp. GeD10 GN=EBGED10_20640 PE=4 SV=1	N1LQ25		Acetyltransferase, GNAT family	>tr|N1LQ25|N1LQ25_9BACI Acetyltransferase, GNAT family OS=Bacillus sp. GeD10	EBGED10_20640
#N/A	N1LRP6		bged03306	Transamidase GatB domain protein	EBGED10_46250	K09117		-0.54275	1.17128	0.06741		0	3.61681	3.73463	2.7873	3.77595	2.81574	2.377	2.94068	3.13555	2.74085	2.82259	3.34608	2.80333	-0.54275		0	233.18	20642000000	191	8	8	8	147	147	16.48	54.4	1.17128	0.54275	2.1144	N1LRP6	N1LRP6	>tr|N1LRP6|N1LRP6_9BACI Transamidase GatB domain protein OS=Bacillus sp. GeD10 GN=EBGED10_46250 PE=4 SV=1	N1LRP6		Transamidase GatB domain protein	>tr|N1LRP6|N1LRP6_9BACI Transamidase GatB domain protein OS=Bacillus sp. GeD10	EBGED10_46250
#N/A	N1LUH1		#N/A	Laccase domain protein	EBGED10_56150	K05810		1.04897	1.17081	0.0674821		0	-2.78856	NaN	-1.06904	-2.18776	-1.28965	-1.74098	-0.969144	0.0525908	-0.473359	-0.79303	-1.83375	-0.784784	1.04897		0	91.611	949540000	37	9	9	9	286	286	31.83	43.4	1.17081	-1.04897	-2.16126	N1LUH1	N1LUH1	>tr|N1LUH1|N1LUH1_9BACI Laccase domain protein OS=Bacillus sp. GeD10 GN=EBGED10_56150 PE=3 SV=1	N1LUH1		Laccase domain protein	>tr|N1LUH1|N1LUH1_9BACI Laccase domain protein OS=Bacillus sp. GeD10	EBGED10_56150
#N/A	N1LKN8		bged00501	DNA topoisomerase	EBGED10_18060	K03169		1.27393	1.16865	0.067819		0	-3.75802	-3.72092	-4.01394	NaN	-2.56557	-3.76849	-2.71107	-2.00518	-1.41053	-1.30818	-3.51462	-2.24069	1.27393		0	5.4454	144260000	19	4	4	4	714	714	81.516	7.6	1.16865	-1.27393	-2.15789	N1LKN8	N1LKN8	>tr|N1LKN8|N1LKN8_9BACI DNA topoisomerase OS=Bacillus sp. GeD10 GN=EBGED10_18060 PE=3 SV=1	N1LKN8		DNA topoisomerase	>tr|N1LKN8|N1LKN8_9BACI DNA topoisomerase OS=Bacillus sp. GeD10	EBGED10_18060
#N/A	N1LFH1		bged00949	Cold shock protein CspD	EBGED10_2390	K03704		-0.752885	1.16741	0.0680129		0	4.77376	3.84543	3.33129	2.74738	3.53441	2.56052	2.84702	2.69761	3.15135	3.21136	3.64646	2.89357	-0.752885		0	323.31	24104000000	1457	4	4	4	66	66	7.2389	80.3	1.16741	0.752884	2.10868	N1LFH1	N1LFH1	>tr|N1LFH1|N1LFH1_9BACI Cold shock protein CspD OS=Bacillus sp. GeD10 GN=EBGED10_2390 PE=4 SV=1	N1LFH1		Cold shock protein CspD	>tr|N1LFH1|N1LFH1_9BACI Cold shock protein CspD OS=Bacillus sp. GeD10	EBGED10_2390
#N/A	N1LY54		bged03246	Amidohydrolase AmhX	EBGED10_46880	K14665		0.665207	1.16634	0.0681804		0	-0.0752352	-0.181401	-0.153742	0.292472	0.124911	-0.147645	0.00958684	1.08355	1.14069	1.24686	0.00140097	0.666608	0.665207		0	115.38	2055800000	104	10	10	10	371	371	41.386	40.7	1.16634	-0.665207	-2.1071	N1LY54	N1LY54	>tr|N1LY54|N1LY54_9BACI Amidohydrolase AmhX OS=Bacillus sp. GeD10 GN=EBGED10_46880 PE=4 SV=1	N1LY54		Amidohydrolase AmhX	>tr|N1LY54|N1LY54_9BACI Amidohydrolase AmhX OS=Bacillus sp. GeD10	EBGED10_46880
#N/A	N1LH04		bged00778	Mobile element protein	EBGED10_5140	K07486		0.505644	1.16473	0.0684342		0	-0.469781	0.385952	-0.0152608	0.142176	-0.398013	0.182526	0.180029	0.904703	0.0781847	0.827853	-0.0709853	0.434659	0.505644		0	192.47	1979700000	109	NaN	13	13	NaN	418	48.157	38.3	1.16473	-0.505644	-2.10471	N1LH04;N1LUP9	N1LH04	>tr|N1LH04|N1LH04_9BACI Mobile element protein OS=Bacillus sp. GeD10 GN=EBGED10_5140 PE=4 SV=1	N1LH04		Mobile element protein	>tr|N1LH04|N1LH04_9BACI Mobile element protein OS=Bacillus sp. GeD10	EBGED10_5140
#N/A	N1LS88		bged02214	Response regulator DrrA	EBGED10_42240	K07775		-1.64982	1.16424	0.0685105		0	NaN	-1.23328	NaN	-1.95897	-0.553327	NaN	NaN	-3.26714	-2.52955	NaN	-1.24852	-2.89834	-1.64982		0	34.248	241260000	25	3	3	3	223	223	26.257	17	1.16424	1.64982	2.78839	N1LS88	N1LS88	>tr|N1LS88|N1LS88_9BACI Response regulator DrrA OS=Bacillus sp. GeD10 GN=EBGED10_42240 PE=4 SV=1	N1LS88		Response regulator DrrA	>tr|N1LS88|N1LS88_9BACI Response regulator DrrA OS=Bacillus sp. GeD10	EBGED10_42240
#N/A	N1LRB4		bged02666	ATP synthase subunit a	atpB	K02108		1.02587	1.16324	0.0686694		0	-2.01715	-1.8154	-2.0421	-1.30743	-1.3163	-1.63882	-1.60733	0	-0.84324	0.720375	-1.69967	-0.673804	1.02587		0	104.86	966750000	40	3	3	3	239	239	26.413	21.8	1.16324	-1.02587	-2.10251	N1LRB4	N1LRB4	>tr|N1LRB4|N1LRB4_9BACI ATP synthase subunit a OS=Bacillus sp. GeD10 GN=atpB PE=3 SV=1	N1LRB4		ATP synthase subunit a	>tr|N1LRB4|N1LRB4_9BACI ATP synthase subunit a OS=Bacillus sp. GeD10	atpB
#N/A	N1LQW2		#N/A	4-hydroxybenzoyl-CoA thioesterase family active site	EBGED10_23390	K07107		0.778671	1.16167	0.0689174		0	-0.0216881	-0.193964	-0.172012	-0.109845	0.30116	1.69571	-0.489005	0.989734	0.974064	0.526504	-0.0392697	0.739401	0.778671		0	106.11	1238700000	59	7	7	7	148	148	17.111	65.5	1.16167	-0.778671	-2.10019	N1LQW2	N1LQW2	>tr|N1LQW2|N1LQW2_9BACI 4-hydroxybenzoyl-CoA thioesterase family active site OS=Bacillus sp. GeD10 GN=EBGED10_23390 PE=4 SV=1	N1LQW2		4-hydroxybenzoyl-CoA thioesterase family active site	>tr|N1LQW2|N1LQW2_9BACI 4-hydroxybenzoyl-CoA thioesterase family active site OS=Bacillus sp. GeD10	EBGED10_23390
#N/A	N1LM17		bged02613	Scaffold protein for [4Fe-4S] cluster assembly ApbC, MRP-like	EBGED10_23110	K03593		0.596588	1.16047	0.0691081		0	0.52352	0.711483	1.15851	1.00968	0.974869	0.47041	1.55385	1.95144	1.59089	1.7944	0.875611	1.4722	0.596588		0	323.31	3213200000	182	13	13	13	355	355	38.581	58	1.16047	-0.596589	-2.09841	N1LM17	N1LM17	>tr|N1LM17|N1LM17_9BACI Scaffold protein for [4Fe-4S] cluster assembly ApbC, MRP-like OS=Bacillus sp. GeD10 GN=EBGED10_23110 PE=4 SV=1	N1LM17		Scaffold protein for [4Fe-4S] cluster assembly ApbC, MRP-like	>tr|N1LM17|N1LM17_9BACI Scaffold protein for [4Fe-4S] cluster assembly ApbC, MRP-like OS=Bacillus sp. GeD10	EBGED10_23110
#N/A	N1LKA4		bged02394	3-hydroxybutyryl-CoA dehydratase	EBGED10_17020	K15866		0.640727	1.16	0.0691831		0	0.691777	-0.0363446	0.866508	1.08385	1.40302	1.27768	0.972029	1.90423	1.19064	1.86787	0.801763	1.44249	0.640727		0	167.52	2420200000	106	11	11	11	262	262	28.663	46.6	1.16	-0.640727	-2.09771	N1LKA4	N1LKA4	>tr|N1LKA4|N1LKA4_9BACI 3-hydroxybutyryl-CoA dehydratase OS=Bacillus sp. GeD10 GN=EBGED10_17020 PE=4 SV=1	N1LKA4		3-hydroxybutyryl-CoA dehydratase	>tr|N1LKA4|N1LKA4_9BACI 3-hydroxybutyryl-CoA dehydratase OS=Bacillus sp. GeD10	EBGED10_17020
#N/A	N1LT94		#N/A	Glyoxalase family protein	EBGED10_32020	K07104		0.66147	1.1596	0.0692466		0	2.41107	2.09896	2.15073	2.48025	2.42105	2.0024	2.6242	3.62243	3.58901	3.03138	2.31241	2.97388	0.66147		0	323.31	11139000000	305	17	17	17	302	302	33.947	64.9	1.1596	-0.661469	-2.09712	N1LT94	N1LT94	>tr|N1LT94|N1LT94_9BACI Glyoxalase family protein OS=Bacillus sp. GeD10 GN=EBGED10_32020 PE=4 SV=1	N1LT94		Glyoxalase family protein	>tr|N1LT94|N1LT94_9BACI Glyoxalase family protein OS=Bacillus sp. GeD10	EBGED10_32020
#N/A	N1LZV0		bged00285	Cys regulon transcriptional activator CysB	EBGED10_55320	K13634		0.814311	1.15872	0.0693874		0	-1.87548	-2.19099	-3.11556	-1.5931	NaN	-2.02584	-1.33	-0.672442	-1.5027	-1.36638	-2.19378	-1.37947	0.814311		0	20.135	382150000	46	12	12	12	294	294	34.318	58.8	1.15872	-0.814311	-2.14241	N1LZV0	N1LZV0	>tr|N1LZV0|N1LZV0_9BACI Cys regulon transcriptional activator CysB OS=Bacillus sp. GeD10 GN=EBGED10_55320 PE=4 SV=1	N1LZV0		Cys regulon transcriptional activator CysB	>tr|N1LZV0|N1LZV0_9BACI Cys regulon transcriptional activator CysB OS=Bacillus sp. GeD10	EBGED10_55320
#N/A	N1LL83		bged00423	50S ribosomal protein L7/L12	rplL	K02935		-0.763137	1.1587	0.0693913		0	7.90177	7.77615	7.32254	7.42506	7.56138	5.54551	6.73867	7.3491	7.03695	7.50098	7.59738	6.83424	-0.763137		0	323.31	386330000000	2996	20	20	20	119	119	12.517	95	1.1587	0.763137	2.09578	N1LL83	N1LL83	>tr|N1LL83|N1LL83_9BACI 50S ribosomal protein L7/L12 OS=Bacillus sp. GeD10 GN=rplL PE=3 SV=1	N1LL83		50S ribosomal protein L7/L12	>tr|N1LL83|N1LL83_9BACI 50S ribosomal protein L7/L12 OS=Bacillus sp. GeD10	rplL
#N/A	N1LKB6		#N/A	Extracellular protein	EBGED10_24240	K06610		0.678124	1.14588	0.0714686		0	-3.44287	NaN	-2.84599	-2.30174	-2.73944	-2.84115	-2.45491	-1.67816	-1.95167	-1.84606	-2.83251	-2.15439	0.678124		0	35.283	364940000	32	7	7	7	288	288	31.656	30.2	1.14588	-0.678124	-2.12239	N1LKB6	N1LKB6	>tr|N1LKB6|N1LKB6_9BACI Extracellular protein OS=Bacillus sp. GeD10 GN=EBGED10_24240 PE=4 SV=1	N1LKB6		Extracellular protein	>tr|N1LKB6|N1LKB6_9BACI Extracellular protein OS=Bacillus sp. GeD10	EBGED10_24240
#N/A	N1LTU1		bged00147	Acetolactate synthase	EBGED10_47890	K01652		1.2028	1.14455	0.0716878		0	-2.02615	-3.05466	-1.42795	-1.06579	-0.866316	-2.1042	-0.412327	0.159349	0.249376	-0.31908	-1.68817	-0.485377	1.2028		0	105.46	770440000	74	15	15	15	566	566	61.883	38.9	1.14455	-1.2028	-2.07484	N1LTU1	N1LTU1	>tr|N1LTU1|N1LTU1_9BACI Acetolactate synthase OS=Bacillus sp. GeD10 GN=EBGED10_47890 PE=3 SV=1	N1LTU1		Acetolactate synthase	>tr|N1LTU1|N1LTU1_9BACI Acetolactate synthase OS=Bacillus sp. GeD10	EBGED10_47890
#N/A	N1LXW3		bged02265	Septation ring formation regulator EzrA	ezrA	K06286		1.05828	1.14311	0.0719267		0	-1.47463	NaN	-0.159172	-0.368646	0.0242426	-0.170412	NaN	0.102784	1.18173	1.1408	-0.494551	0.563726	1.05828		0	121.61	951100000	30	8	8	8	570	570	66.456	25.3	1.14311	-1.05828	-2.18136	N1LXW3	N1LXW3	>tr|N1LXW3|N1LXW3_9BACI Septation ring formation regulator EzrA OS=Bacillus sp. GeD10 GN=ezrA PE=3 SV=1	N1LXW3		Septation ring formation regulator EzrA	>tr|N1LXW3|N1LXW3_9BACI Septation ring formation regulator EzrA OS=Bacillus sp. GeD10	ezrA
#N/A	N1LN41		bged02920	Arsenate reductase	EBGED10_13750	K00537		1.20197	1.13853	0.0726892		0	-1.70786	-1.05358	-1.05579	-1.21857	-1.24912	-2.24089	0.123403	0.966419	0.169574	0.706436	-1.25698	-0.0550106	1.20197		0	205.52	2870600000	48	8	8	8	121	121	14.153	61.2	1.13853	-1.20197	-2.06591	N1LN41	N1LN41	>tr|N1LN41|N1LN41_9BACI Arsenate reductase OS=Bacillus sp. GeD10 GN=EBGED10_13750 PE=4 SV=1	N1LN41		Arsenate reductase	>tr|N1LN41|N1LN41_9BACI Arsenate reductase OS=Bacillus sp. GeD10	EBGED10_13750
#N/A	N1LQ43		#N/A	Phage shock protein A	EBGED10_20850	K03969		-0.556895	1.1383	0.0727277		0	1.81703	1.66246	1.39225	2.5788	2.26014	1.58715	1.85412	1.45935	1.07416	0.951427	1.94214	1.38524	-0.556895		0	137.58	6012100000	139	15	15	15	221	221	25.328	52.5	1.1383	0.556895	2.06557	N1LQ43	N1LQ43	>tr|N1LQ43|N1LQ43_9BACI Phage shock protein A OS=Bacillus sp. GeD10 GN=EBGED10_20850 PE=4 SV=1	N1LQ43		Phage shock protein A	>tr|N1LQ43|N1LQ43_9BACI Phage shock protein A OS=Bacillus sp. GeD10	EBGED10_20850
#N/A	N1LG46		bged01149	PTS system, N-acetylglucosamine-specific IIB component / PTS system,N-acetylglucosamine-specific IIC component	EBGED10_4410	K02803		1.73148	1.137	0.0729455		0	NaN	-2.73149	-1.61684	-0.610421	-0.975942	-1.72109	0.360449	2.2244	-0.0256799	0.400946	-1.48367	0.247806	1.73148		0	49.188	840020000	56	8	8	8	500	500	52.728	25.8	1.137	-1.73148	-2.10854	N1LG46	N1LG46	>tr|N1LG46|N1LG46_9BACI PTS system, N-acetylglucosamine-specific IIB component / PTS system,N-acetylglucosamine-specific IIC component OS=Bacillus sp. GeD10 GN=EBGED10_4410 PE=4 SV=1	N1LG46		PTS system, N-acetylglucosamine-specific IIB component / PTS system,N-acetylglucosamine-specific IIC component	>tr|N1LG46|N1LG46_9BACI PTS system, N-acetylglucosamine-specific IIB component / PTS system,N-acetylglucosamine-specific IIC component OS=Bacillus sp. GeD10	EBGED10_4410
#N/A	N1LWN2		bged02753	Acetyltransferase, GNAT family	EBGED10_43820	K00680		-0.841975	1.13606	0.0731038		0	-0.765923	-1.47649	-0.345689	-0.551663	-0.107488	-2.4828	-0.938029	-1.32602	-1.21885	NaN	-0.64945	-1.49142	-0.841975		0	118.75	828780000	36	7	7	7	151	151	17.757	48.3	1.13606	0.841975	2.10707	N1LWN2	N1LWN2	>tr|N1LWN2|N1LWN2_9BACI Acetyltransferase, GNAT family OS=Bacillus sp. GeD10 GN=EBGED10_43820 PE=4 SV=1	N1LWN2		Acetyltransferase, GNAT family	>tr|N1LWN2|N1LWN2_9BACI Acetyltransferase, GNAT family OS=Bacillus sp. GeD10	EBGED10_43820
#N/A	N1LRP3		#N/A	Uncharacterized protein	EBGED10_39940	#N/A		0.870705	1.13433	0.0733961		0	-3.82899	NaN	NaN	-3.14015	-2.62975	NaN	-2.40846	-2.44408	NaN	-2.13424	-3.19963	-2.32893	0.870705		0	37.602	312360000	22	5	5	5	191	191	22.414	39.3	1.13433	-0.870706	-2.41199	N1LRP3	N1LRP3	>tr|N1LRP3|N1LRP3_9BACI Uncharacterized protein OS=Bacillus sp. GeD10 GN=EBGED10_39940 PE=4 SV=1	N1LRP3		Uncharacterized protein	>tr|N1LRP3|N1LRP3_9BACI Uncharacterized protein OS=Bacillus sp. GeD10	EBGED10_39940
#N/A	N1LIH7		bged01862	Acetyl-CoA hydrolase/transferase family protein	EBGED10_10610	K18118		0.287769	1.13367	0.0735077		0	1.76528	2.21794	2.26811	2.41896	2.43105	2.39438	2.61747	2.72884	2.38444	2.41507	2.22027	2.50804	0.287769		0	323.31	6170400000	243	23	23	23	504	504	55.656	60.5	1.13367	-0.287769	-2.0587	N1LIH7	N1LIH7	>tr|N1LIH7|N1LIH7_9BACI Acetyl-CoA hydrolase/transferase family protein OS=Bacillus sp. GeD10 GN=EBGED10_10610 PE=4 SV=1	N1LIH7		Acetyl-CoA hydrolase/transferase family protein	>tr|N1LIH7|N1LIH7_9BACI Acetyl-CoA hydrolase/transferase family protein OS=Bacillus sp. GeD10	EBGED10_10610
#N/A	N1LXE1		bged02877	DegV family protein	EBGED10_61370	K03695		1.14449	1.12717	0.0746164		0	NaN	-3.25532	-3.43797	-2.2854	-3.34441	NaN	-2.35813	-1.51444	NaN	NaN	-3.08077	-1.93629	1.14449		0	24.222	206090000	20	5	5	5	268	268	30.257	25.7	1.12717	-1.14449	-2.39678	N1LXE1	N1LXE1	>tr|N1LXE1|N1LXE1_9BACI DegV family protein OS=Bacillus sp. GeD10 GN=EBGED10_61370 PE=4 SV=1	N1LXE1		DegV family protein	>tr|N1LXE1|N1LXE1_9BACI DegV family protein OS=Bacillus sp. GeD10	EBGED10_61370
#N/A	N1LQN7		bged00962	D,D-heptose 1,7-bisphosphate phosphatase	EBGED10_42700	K03273		-0.758736	1.1255	0.0749032		0	NaN	NaN	-1.96887	-2.43866	-2.35659	NaN	NaN	-2.72872	NaN	-3.29817	-2.25471	-3.01344	-0.758736		0	12.967	348510000	15	6	6	6	175	175	19.268	41.7	1.1255	0.758736	2.68229	N1LQN7	N1LQN7	>tr|N1LQN7|N1LQN7_9BACI D,D-heptose 1,7-bisphosphate phosphatase OS=Bacillus sp. GeD10 GN=EBGED10_42700 PE=3 SV=1	N1LQN7		D,D-heptose 1,7-bisphosphate phosphatase	>tr|N1LQN7|N1LQN7_9BACI D,D-heptose 1,7-bisphosphate phosphatase OS=Bacillus sp. GeD10	EBGED10_42700
#N/A	N1LGM6		bged02732	GCN5-related N-acetyltransferase	EBGED10_12530	K00680		-0.550004	1.12531	0.0749366		0	-3.82453	NaN	NaN	-3.89401	NaN	NaN	NaN	-4.56513	-4.25342	NaN	-3.85927	-4.40927	-0.550004		0	16.772	76684000	16	4	4	4	134	134	15.622	34.3	1.12531	0.550004	3.44443	N1LGM6	N1LGM6	>tr|N1LGM6|N1LGM6_9BACI GCN5-related N-acetyltransferase OS=Bacillus sp. GeD10 GN=EBGED10_12530 PE=4 SV=1	N1LGM6		GCN5-related N-acetyltransferase	>tr|N1LGM6|N1LGM6_9BACI GCN5-related N-acetyltransferase OS=Bacillus sp. GeD10	EBGED10_12530
#N/A	N1LQB8		#N/A	Uncharacterized protein	EBGED10_21590	#N/A		-1.08714	1.1253	0.0749384		0	-4.14296	-4.33749	-4.43342	-3.42854	-3.37918	-5.60565	NaN	NaN	-4.45726	NaN	-3.94432	-5.03146	-1.08714		0	6.1217	86850000	12	2	2	2	67	67	8.1922	23.9	1.1253	1.08714	2.24293	N1LQB8	N1LQB8	>tr|N1LQB8|N1LQB8_9BACI Uncharacterized protein OS=Bacillus sp. GeD10 GN=EBGED10_21590 PE=4 SV=1	N1LQB8		Uncharacterized protein	>tr|N1LQB8|N1LQB8_9BACI Uncharacterized protein OS=Bacillus sp. GeD10	EBGED10_21590
#N/A	N1LNZ6		bged01547	Nitrite reductase [NAD(P)H] small subunit	EBGED10_30290	K00363		-1.08143	1.11973	0.0759053		0	0.616181	0.602706	1.47082	-0.458889	1.80497	0.114316	-0.225595	-0.401477	0.64224	-1.50083	0.807158	-0.27427	-1.08143		0	70.837	2743600000	59	3	3	3	105	105	11.827	38.1	1.11973	1.08143	2.03803	N1LNZ6	N1LNZ6	>tr|N1LNZ6|N1LNZ6_9BACI Nitrite reductase [NAD(P)H] small subunit OS=Bacillus sp. GeD10 GN=EBGED10_30290 PE=4 SV=1	N1LNZ6		Nitrite reductase [NAD(P)H] small subunit	>tr|N1LNZ6|N1LNZ6_9BACI Nitrite reductase [NAD(P)H] small subunit OS=Bacillus sp. GeD10	EBGED10_30290
#N/A	N1LQX4		#N/A	Uncharacterized protein	EBGED10_38560	#N/A		-0.534765	1.10928	0.0777527		0	-1.20746	-0.728607	0.0458544	-1.04856	-0.51262	-1.26157	-0.835841	-1.29886	-1.02514	-1.70379	-0.690278	-1.22504	-0.534765		0	170.28	1091900000	44	6	6	6	152	152	17.914	57.9	1.10928	0.534765	2.02253	N1LQX4	N1LQX4	>tr|N1LQX4|N1LQX4_9BACI Uncharacterized protein OS=Bacillus sp. GeD10 GN=EBGED10_38560 PE=4 SV=1	N1LQX4		Uncharacterized protein	>tr|N1LQX4|N1LQX4_9BACI Uncharacterized protein OS=Bacillus sp. GeD10	EBGED10_38560
#N/A	N1LSA3		bged03108	Azoreductase	EBGED10_43160	K03206		-0.372211	1.10816	0.0779537		0	2.89947	2.77405	2.88272	2.62581	2.68588	2.10698	2.29868	2.34902	3.08448	2.16772	2.77359	2.40138	-0.372211		0	254.1	11952000000	176	10	10	10	178	178	19.397	82	1.10816	0.372211	2.02087	N1LSA3	N1LSA3	>tr|N1LSA3|N1LSA3_9BACI Azoreductase OS=Bacillus sp. GeD10 GN=EBGED10_43160 PE=4 SV=1	N1LSA3		Azoreductase	>tr|N1LSA3|N1LSA3_9BACI Azoreductase OS=Bacillus sp. GeD10	EBGED10_43160
#N/A	N1M0D7		bged00389	Transcriptional regulator in cluster with Zn-dependent hydrolase	EBGED10_57220	K03710		0.365443	1.10699	0.0781644		0	2.28144	2.33865	1.70988	2.47288	2.43263	2.62669	2.18477	2.61053	2.85213	2.78858	2.2471	2.61254	0.365443		0	323.31	9411800000	412	18	18	18	241	241	27.481	78.4	1.10699	-0.365443	-2.01913	N1M0D7	N1M0D7	>tr|N1M0D7|N1M0D7_9BACI Transcriptional regulator in cluster with Zn-dependent hydrolase OS=Bacillus sp. GeD10 GN=EBGED10_57220 PE=4 SV=1	N1M0D7		Transcriptional regulator in cluster with Zn-dependent hydrolase	>tr|N1M0D7|N1M0D7_9BACI Transcriptional regulator in cluster with Zn-dependent hydrolase OS=Bacillus sp. GeD10	EBGED10_57220
#N/A	N1LGG5		bged02905	Aminodeoxychorismate lyase	EBGED10_3170	K02619		-0.819421	1.10556	0.0784227		0	-1.45532	-1.86266	-1.89779	-0.719584	-1.11395	-2.89755	NaN	-1.85229	-1.938	NaN	-1.40986	-2.22928	-0.819421		0	41.496	427690000	29	7	7	7	290	290	32.997	29.7	1.10556	0.819421	2.11871	N1LGG5	N1LGG5	>tr|N1LGG5|N1LGG5_9BACI Aminodeoxychorismate lyase OS=Bacillus sp. GeD10 GN=EBGED10_3170 PE=3 SV=1	N1LGG5		Aminodeoxychorismate lyase	>tr|N1LGG5|N1LGG5_9BACI Aminodeoxychorismate lyase OS=Bacillus sp. GeD10	EBGED10_3170
#N/A	N1LYQ2		bged02480	Endoribonuclease YbeY	ybeY	K07042		-0.497805	1.09496	0.0803607		0	-1.62239	-1.36398	-1.21671	-0.650362	-0.845774	-2.09172	-2.0164	-1.19482	-1.42438	-1.46092	-1.13984	-1.63765	-0.497805		0	55.498	869490000	44	6	6	6	156	156	18.069	37.8	1.09496	0.497805	2.00125	N1LYQ2	N1LYQ2	>tr|N1LYQ2|N1LYQ2_9BACI Endoribonuclease YbeY OS=Bacillus sp. GeD10 GN=ybeY PE=3 SV=1	N1LYQ2		Endoribonuclease YbeY	>tr|N1LYQ2|N1LYQ2_9BACI Endoribonuclease YbeY OS=Bacillus sp. GeD10	ybeY
#N/A	N1LZP7		bged02710	Tellurium resistance protein TerD	EBGED10_52730	K05795		-0.60214	1.09467	0.0804137		0	5.0948	4.80345	4.74619	5.39626	5.21846	3.4498	4.43294	5.04147	4.47844	4.84583	5.05183	4.4497	-0.60214		0	323.31	54286000000	899	13	13	13	194	194	21.071	85.1	1.09467	0.60214	2.00082	N1LZP7	N1LZP7	>tr|N1LZP7|N1LZP7_9BACI Tellurium resistance protein TerD OS=Bacillus sp. GeD10 GN=EBGED10_52730 PE=4 SV=1	N1LZP7		Tellurium resistance protein TerD	>tr|N1LZP7|N1LZP7_9BACI Tellurium resistance protein TerD OS=Bacillus sp. GeD10	EBGED10_52730
#N/A	N1LWU9		#N/A	Uncharacterized protein	EBGED10_42180	#N/A		-0.812931	1.09261	0.0807959		0	-0.0299917	0.732978	0.68412	0.150306	0.531915	-0.328577	-0.618178	-0.97411	1.01418	-1.08864	0.413865	-0.399066	-0.812931		0	59.38	2096000000	46	9	9	9	160	160	17.598	63.1	1.09261	0.812931	1.99776	N1LWU9	N1LWU9	>tr|N1LWU9|N1LWU9_9BACI Uncharacterized protein OS=Bacillus sp. GeD10 GN=EBGED10_42180 PE=4 SV=1	N1LWU9		Uncharacterized protein	>tr|N1LWU9|N1LWU9_9BACI Uncharacterized protein OS=Bacillus sp. GeD10	EBGED10_42180
#N/A	N1LFS2		bged00164	Bifunctional protein GlmU	glmU	K04042		0.579893	1.09022	0.081241		0	2.87418	2.64733	2.96836	2.91471	2.97373	2.36522	3.55926	4.02252	3.73672	3.59407	2.87566	3.45556	0.579893		0	323.31	11505000000	364	13	13	13	459	459	49.429	45.1	1.09022	-0.579893	-1.99421	N1LFS2	N1LFS2	>tr|N1LFS2|N1LFS2_9BACI Bifunctional protein GlmU OS=Bacillus sp. GeD10 GN=glmU PE=3 SV=1	N1LFS2		Bifunctional protein GlmU	>tr|N1LFS2|N1LFS2_9BACI Bifunctional protein GlmU OS=Bacillus sp. GeD10	glmU
#N/A	N1LDW6		bged01483	Sulfate-binding protein Sbp	EBGED10_3750	K02048		0.577774	1.08886	0.0814974		0	-1.20247	-0.314763	-0.328438	0.247625	-0.206805	0.113805	-0.361617	0.54945	0.564579	0.217808	-0.360969	0.216805	0.577774		0	187.6	1989500000	81	19	19	19	351	351	39.003	59	1.08886	-0.577774	-1.99218	N1LDW6	N1LDW6	>tr|N1LDW6|N1LDW6_9BACI Sulfate-binding protein Sbp OS=Bacillus sp. GeD10 GN=EBGED10_3750 PE=4 SV=1	N1LDW6		Sulfate-binding protein Sbp	>tr|N1LDW6|N1LDW6_9BACI Sulfate-binding protein Sbp OS=Bacillus sp. GeD10	EBGED10_3750
#N/A	N1LR88		#N/A	Transcriptional regulator, PadR family	EBGED10_39710	#N/A		-0.654148	1.0871	0.0818273		0	-3.73576	-3.17625	-3.45235	NaN	-3.10492	-4.60834	-4.51147	-3.73588	-4.0655	-3.18614	-3.36732	-4.02147	-0.654148		0	5.8025	189510000	13	2	2	2	105	105	11.96	18.1	1.0871	0.654148	2.03071	N1LR88	N1LR88	>tr|N1LR88|N1LR88_9BACI Transcriptional regulator, PadR family OS=Bacillus sp. GeD10 GN=EBGED10_39710 PE=4 SV=1	N1LR88		Transcriptional regulator, PadR family	>tr|N1LR88|N1LR88_9BACI Transcriptional regulator, PadR family OS=Bacillus sp. GeD10	EBGED10_39710
#N/A	N1LRD2		bged02606	Amino acid ABC transporter, amino acid-binding protein	EBGED10_25160	K02030		-0.570494	1.08651	0.081938		0	-0.360496	0.320753	0.316003	0.537958	0.291025	-0.901417	-0.923016	-0.00883323	-0.207637	0.293675	0.221048	-0.349446	-0.570494		0	149.54	1882600000	106	14	14	14	259	259	28.624	57.5	1.08651	0.570494	1.9887	N1LRD2	N1LRD2	>tr|N1LRD2|N1LRD2_9BACI Amino acid ABC transporter, amino acid-binding protein OS=Bacillus sp. GeD10 GN=EBGED10_25160 PE=3 SV=1	N1LRD2		Amino acid ABC transporter, amino acid-binding protein	>tr|N1LRD2|N1LRD2_9BACI Amino acid ABC transporter, amino acid-binding protein OS=Bacillus sp. GeD10	EBGED10_25160
#N/A	N1LI91		bged00178	Pseudouridine synthase	EBGED10_12040	K06182		0.325169	1.08595	0.0820455		0	0.249841	-0.252027	-0.111512	0.308924	0.466204	0.550149	0.104457	0.512055	0.476155	0.644459	0.132286	0.457455	0.325169		0	228.59	1788300000	80	10	10	10	235	235	26.814	57.4	1.08595	-0.325169	-1.98785	N1LI91	N1LI91	>tr|N1LI91|N1LI91_9BACI Pseudouridine synthase OS=Bacillus sp. GeD10 GN=EBGED10_12040 PE=3 SV=1	N1LI91		Pseudouridine synthase	>tr|N1LI91|N1LI91_9BACI Pseudouridine synthase OS=Bacillus sp. GeD10	EBGED10_12040
#N/A	N1LRA8		bged02044	GTPase Der	der	K03977		0.414207	1.0818	0.0828322		0	2.87034	3.02458	3.21587	3.52829	3.60995	3.14522	3.51908	3.88329	3.75655	4.01593	3.24981	3.66401	0.414207		0	323.31	15314000000	525	25	25	25	436	436	48.618	79.8	1.0818	-0.414207	-1.98169	N1LRA8	N1LRA8	>tr|N1LRA8|N1LRA8_9BACI GTPase Der OS=Bacillus sp. GeD10 GN=der PE=3 SV=1	N1LRA8		GTPase Der	>tr|N1LRA8|N1LRA8_9BACI GTPase Der OS=Bacillus sp. GeD10	der
#N/A	N1LHZ0		bged00957	Acetoacetyl-CoA reductase	EBGED10_8550	K00023		0.439466	1.07785	0.0835891		0	4.92478	5.27153	5.14678	4.94564	5.24984	4.75154	5.76493	5.85375	5.49589	5.86978	5.10771	5.54718	0.439466		0	323.31	74802000000	709	20	20	20	247	247	26.477	88.7	1.07785	-0.439466	-1.97581	N1LHZ0	N1LHZ0	>tr|N1LHZ0|N1LHZ0_9BACI Acetoacetyl-CoA reductase OS=Bacillus sp. GeD10 GN=EBGED10_8550 PE=3 SV=1	N1LHZ0		Acetoacetyl-CoA reductase	>tr|N1LHZ0|N1LHZ0_9BACI Acetoacetyl-CoA reductase OS=Bacillus sp. GeD10	EBGED10_8550
#N/A	N1LRH2		bged00408	Transcriptional regulator MntR	mntR	K03709		-0.554139	1.07595	0.0839557		0	-0.784754	-0.819121	-0.33984	-0.73308	-0.253231	-1.59152	-1.39016	-0.171092	-1.11626	-1.43168	-0.586005	-1.14014	-0.554139		0	133.74	1430100000	50	8	8	8	142	142	16.566	66.2	1.07595	0.554139	1.97298	N1LRH2	N1LRH2	>tr|N1LRH2|N1LRH2_9BACI Transcriptional regulator MntR OS=Bacillus sp. GeD10 GN=mntR PE=3 SV=1	N1LRH2		Transcriptional regulator MntR	>tr|N1LRH2|N1LRH2_9BACI Transcriptional regulator MntR OS=Bacillus sp. GeD10	mntR
#N/A	N1LUP4		bged01831	1-deoxy-D-xylulose 5-phosphate reductoisomerase	dxr	K00099		0.566424	1.075	0.084139		0	-0.0743348	-0.496401	-0.307806	-0.100924	-0.0714065	-0.740103	0.561184	0.640318	0.676656	0.643194	-0.210174	0.35625	0.566424		0	236.17	1552000000	118	13	13	13	380	380	42.255	49.7	1.075	-0.566424	-1.97157	N1LUP4	N1LUP4	>tr|N1LUP4|N1LUP4_9BACI 1-deoxy-D-xylulose 5-phosphate reductoisomerase OS=Bacillus sp. GeD10 GN=dxr PE=3 SV=1	N1LUP4		1-deoxy-D-xylulose 5-phosphate reductoisomerase	>tr|N1LUP4|N1LUP4_9BACI 1-deoxy-D-xylulose 5-phosphate reductoisomerase OS=Bacillus sp. GeD10	dxr
#N/A	N1LG84		bged03241	Mutator mutT protein (7,8-dihydro-8-oxoguanine-triphosphatase)	EBGED10_11370	K03574		-1.19525	1.07454	0.0842292		0	-0.974479	-0.918292	-0.656353	-0.554151	-0.30095	-3.92637	-1.48045	-0.71497	-2.41106	-0.847649	-0.680845	-1.8761	-1.19525		0	127.9	830330000	51	8	8	8	152	152	17.548	57.9	1.07454	1.19525	1.97088	N1LG84	N1LG84	>tr|N1LG84|N1LG84_9BACI Mutator mutT protein (7,8-dihydro-8-oxoguanine-triphosphatase) OS=Bacillus sp. GeD10 GN=EBGED10_11370 PE=4 SV=1	N1LG84		Mutator mutT protein (7,8-dihydro-8-oxoguanine-triphosphatase)	>tr|N1LG84|N1LG84_9BACI Mutator mutT protein (7,8-dihydro-8-oxoguanine-triphosphatase) OS=Bacillus sp. GeD10	EBGED10_11370
#N/A	N1LP25		bged00698	6-phosphogluconate dehydrogenase, decarboxylating	EBGED10_30690	K00033		0.981961	1.06933	0.0852445		0	-2.4426	-1.60505	-1.25	-1.6438	-1.52956	-2.30089	-1.09091	-0.344963	-0.164083	0.339642	-1.6942	-0.712241	0.981961		0	110.39	1267500000	69	13	13	13	297	297	32.636	58.6	1.06933	-0.981961	-1.96313	N1LP25	N1LP25	>tr|N1LP25|N1LP25_9BACI 6-phosphogluconate dehydrogenase, decarboxylating OS=Bacillus sp. GeD10 GN=EBGED10_30690 PE=3 SV=1	N1LP25		6-phosphogluconate dehydrogenase, decarboxylating	>tr|N1LP25|N1LP25_9BACI 6-phosphogluconate dehydrogenase, decarboxylating OS=Bacillus sp. GeD10	EBGED10_30690
#N/A	N1LM59		bged01506	Flagellar motor rotation protein MotA	EBGED10_23410	K02556		1.66328	1.0676	0.0855858		0	-3.12469	-3.95167	NaN	NaN	-2.42954	NaN	NaN	-1.92738	-2.24	-0.348686	-3.16863	-1.50535	1.66328		0	59.106	153610000	15	3	3	3	264	264	28.876	20.8	1.0676	-1.66328	-2.2715	N1LM59	N1LM59	>tr|N1LM59|N1LM59_9BACI Flagellar motor rotation protein MotA OS=Bacillus sp. GeD10 GN=EBGED10_23410 PE=4 SV=1	N1LM59		Flagellar motor rotation protein MotA	>tr|N1LM59|N1LM59_9BACI Flagellar motor rotation protein MotA OS=Bacillus sp. GeD10	EBGED10_23410
#N/A	N1LR27		bged02960	Ribosomal-protein-alanine acetyltransferase	EBGED10_38040	K03789		0.519593	1.06744	0.0856164		0	-1.23948	-1.80793	-1.1639	-1.86488	-0.726459	-1.44014	-0.762446	-0.515509	-0.693167	-0.793423	-1.36053	-0.840937	0.519593		0	56.295	583500000	28	3	3	3	157	157	17.952	29.9	1.06744	-0.519594	-1.96031	N1LR27	N1LR27	>tr|N1LR27|N1LR27_9BACI Ribosomal-protein-alanine acetyltransferase OS=Bacillus sp. GeD10 GN=EBGED10_38040 PE=4 SV=1	N1LR27		Ribosomal-protein-alanine acetyltransferase	>tr|N1LR27|N1LR27_9BACI Ribosomal-protein-alanine acetyltransferase OS=Bacillus sp. GeD10	EBGED10_38040
#N/A	N1LW14		bged02412	3-ketoacyl-CoA thiolase @ Acetyl-CoA acetyltransferase	EBGED10_54890	K00626		0.482443	1.06724	0.0856571		0	4.14139	4.35027	4.44621	4.4207	4.31132	3.89606	4.89455	4.90642	5.12348	5.2616	4.33398	4.81642	0.482443		0	323.31	37413000000	889	26	26	26	391	391	41.869	72.4	1.06724	-0.482443	-1.96001	N1LW14	N1LW14	>tr|N1LW14|N1LW14_9BACI 3-ketoacyl-CoA thiolase @ Acetyl-CoA acetyltransferase OS=Bacillus sp. GeD10 GN=EBGED10_54890 PE=3 SV=1	N1LW14		3-ketoacyl-CoA thiolase @ Acetyl-CoA acetyltransferase	>tr|N1LW14|N1LW14_9BACI 3-ketoacyl-CoA thiolase @ Acetyl-CoA acetyltransferase OS=Bacillus sp. GeD10	EBGED10_54890
#N/A	N1LVZ7		bged01575	Dihydroorotate dehydrogenase B (NAD(+)), electron transfer subunit	pyrK	K02823		0.409787	1.06661	0.08578		0	0.41566	0.27918	0.0842146	0.579196	0.325919	0.248729	0.340035	0.857938	1.10644	1.17997	0.336834	0.746621	0.409787		0	306.75	2747200000	98	12	12	12	259	259	28.416	65.6	1.06661	-0.409787	-1.95908	N1LVZ7	N1LVZ7	>tr|N1LVZ7|N1LVZ7_9BACI Dihydroorotate dehydrogenase B (NAD(+)), electron transfer subunit OS=Bacillus sp. GeD10 GN=pyrK PE=3 SV=1	N1LVZ7		Dihydroorotate dehydrogenase B (NAD(+)), electron transfer subunit	>tr|N1LVZ7|N1LVZ7_9BACI Dihydroorotate dehydrogenase B (NAD(+)), electron transfer subunit OS=Bacillus sp. GeD10	pyrK
#N/A	N1LSU0		bged02083	Poly(Glycerol-phosphate) alpha-glucosyltransferase	EBGED10_27670	K00754		0.670674	1.06576	0.0859484		0	-0.881253	-2.45068	-1.11734	-0.916662	-1.46681	NaN	-0.80064	-0.472489	-0.739775	-0.770596	-1.36655	-0.695875	0.670674		0	182.78	828680000	33	8	8	8	369	369	41.689	39.6	1.06576	-0.670674	-1.9974	N1LSU0	N1LSU0	>tr|N1LSU0|N1LSU0_9BACI Poly(Glycerol-phosphate) alpha-glucosyltransferase OS=Bacillus sp. GeD10 GN=EBGED10_27670 PE=4 SV=1	N1LSU0		Poly(Glycerol-phosphate) alpha-glucosyltransferase	>tr|N1LSU0|N1LSU0_9BACI Poly(Glycerol-phosphate) alpha-glucosyltransferase OS=Bacillus sp. GeD10	EBGED10_27670
#N/A	N1LQC0		bged00816	Flagellin protein FlaA	EBGED10_35140	K02406		-0.914051	1.06575	0.0859507		0	2.53663	3.41506	3.82201	3.15863	3.89199	1.11638	2.09165	2.74135	3.43802	2.86668	3.36487	2.45082	-0.914051		0	323.31	13712000000	429	36	36	36	371	371	40.377	77.6	1.06575	0.914051	1.95779	N1LQC0	N1LQC0	>tr|N1LQC0|N1LQC0_9BACI Flagellin protein FlaA OS=Bacillus sp. GeD10 GN=EBGED10_35140 PE=4 SV=1	N1LQC0		Flagellin protein FlaA	>tr|N1LQC0|N1LQC0_9BACI Flagellin protein FlaA OS=Bacillus sp. GeD10	EBGED10_35140
#N/A	N1LLL0		bged00804	Methyl-accepting chemotaxis protein	EBGED10_21560	K03406		0.586218	1.06566	0.085969		0	0.299508	0.774306	0.740099	1.04513	0.979651	0.572041	0.953866	2.05349	1.78793	1.40246	0.767739	1.35396	0.586218		0	315.12	3354600000	150	17	17	17	313	313	35.356	73.5	1.06566	-0.586218	-1.95766	N1LLL0	N1LLL0	>tr|N1LLL0|N1LLL0_9BACI Methyl-accepting chemotaxis protein OS=Bacillus sp. GeD10 GN=EBGED10_21560 PE=4 SV=1	N1LLL0		Methyl-accepting chemotaxis protein	>tr|N1LLL0|N1LLL0_9BACI Methyl-accepting chemotaxis protein OS=Bacillus sp. GeD10	EBGED10_21560
#N/A	N1LY90		bged00707	Phosphoribosylformylglycinamidine synthase subunit PurQ	purQ	K01952		-0.444538	1.06476	0.086146		0	4.68929	4.95864	5.04141	4.93189	5.00762	3.6442	4.88982	4.61311	4.5141	4.74492	4.92577	4.48123	-0.444538		0	323.31	38950000000	235	10	10	10	227	227	25.32	63.4	1.06476	0.444538	1.95633	N1LY90	N1LY90	>tr|N1LY90|N1LY90_9BACI Phosphoribosylformylglycinamidine synthase subunit PurQ OS=Bacillus sp. GeD10 GN=purQ PE=3 SV=1	N1LY90		Phosphoribosylformylglycinamidine synthase subunit PurQ	>tr|N1LY90|N1LY90_9BACI Phosphoribosylformylglycinamidine synthase subunit PurQ OS=Bacillus sp. GeD10	purQ
#N/A	N1LVI2		#N/A	Sporulation-control protein Spo0M, putative	EBGED10_53590	K06377		-0.387225	1.0646	0.0861789		0	0.869066	0.775276	0.210683	0.871098	1.00728	0.164106	0.0195095	0.834692	0.478654	0.300318	0.74668	0.359456	-0.387225		0	323.31	2735200000	92	16	16	16	251	251	28.659	78.1	1.0646	0.387225	1.95608	N1LVI2	N1LVI2	>tr|N1LVI2|N1LVI2_9BACI Sporulation-control protein Spo0M, putative OS=Bacillus sp. GeD10 GN=EBGED10_53590 PE=4 SV=1	N1LVI2		Sporulation-control protein Spo0M, putative	>tr|N1LVI2|N1LVI2_9BACI Sporulation-control protein Spo0M, putative OS=Bacillus sp. GeD10	EBGED10_53590
#N/A	N1LFR5		bged02256	Potassium-transporting ATPase B chain	kdpB	K01547		0.824891	1.05696	0.0877086		0	-1.33336	-0.595873	0.0575481	-0.629918	0.0597169	-0.84854	0.309946	0.441158	0.554019	1.22599	-0.488377	0.336514	0.824891		0	61.547	932440000	117	16	16	16	697	697	74.406	31.3	1.05696	-0.824891	-1.94469	N1LFR5	N1LFR5	>tr|N1LFR5|N1LFR5_9BACI Potassium-transporting ATPase B chain OS=Bacillus sp. GeD10 GN=kdpB PE=3 SV=1	N1LFR5		Potassium-transporting ATPase B chain	>tr|N1LFR5|N1LFR5_9BACI Potassium-transporting ATPase B chain OS=Bacillus sp. GeD10	kdpB
#N/A	N1LKS7		bged01587	Diaminopimelate decarboxylase	lysA	K01586		0.682592	1.05256	0.0886007		0	-1.43982	-0.837019	-0.677167	-0.613889	-0.422864	-1.24159	-0.184816	0.213654	0.0705741	0.564372	-0.798153	-0.115561	0.682592		0	76.417	870910000	110	14	14	14	438	438	48.48	46.1	1.05256	-0.682592	-1.93814	N1LKS7	N1LKS7	>tr|N1LKS7|N1LKS7_9BACI Diaminopimelate decarboxylase OS=Bacillus sp. GeD10 GN=lysA PE=3 SV=1	N1LKS7		Diaminopimelate decarboxylase	>tr|N1LKS7|N1LKS7_9BACI Diaminopimelate decarboxylase OS=Bacillus sp. GeD10	lysA
#N/A	N1LN66		#N/A	Periplasmic component of efflux system	EBGED10_33850	K02005		0.653085	1.04219	0.0907432		0	-0.0288305	-0.121024	0.714757	0.392133	0.600081	-0.132747	0.961745	1.06549	1.32416	1.60389	0.311423	0.964508	0.653085		0	212.56	2102400000	211	4	4	17	397	397	43.693	9.3	1.04219	-0.653085	-1.92265	N1LN66	N1LN66	>tr|N1LN66|N1LN66_9BACI Periplasmic component of efflux system OS=Bacillus sp. GeD10 GN=EBGED10_33850 PE=4 SV=1	N1LN66		Periplasmic component of efflux system	>tr|N1LN66|N1LN66_9BACI Periplasmic component of efflux system OS=Bacillus sp. GeD10	EBGED10_33850
#N/A	N1LT21		bged01314	Cys-tRNA(Pro)/Cys-tRNA(Cys) deacylase	EBGED10_31270	K03976		-0.483993	1.04139	0.0909091		0	-1.76985	-1.54428	-1.14343	-1.44033	-0.83894	NaN	-2.31576	-1.6627	-1.4387	-1.90827	-1.34737	-1.83136	-0.483993		0	45.047	614450000	34	5	5	5	158	158	17.515	36.7	1.04139	0.483993	1.95933	N1LT21	N1LT21	>tr|N1LT21|N1LT21_9BACI Cys-tRNA(Pro)/Cys-tRNA(Cys) deacylase OS=Bacillus sp. GeD10 GN=EBGED10_31270 PE=3 SV=1	N1LT21		Cys-tRNA(Pro)/Cys-tRNA(Cys) deacylase	>tr|N1LT21|N1LT21_9BACI Cys-tRNA(Pro)/Cys-tRNA(Cys) deacylase OS=Bacillus sp. GeD10	EBGED10_31270
#N/A	N1LMJ1		bged02595	Threonine--tRNA ligase	thrS	K01868		1.20196	1.03938	0.0913305		0	NaN	-2.09647	-1.728	-1.54642	-1.52027	-2.45911	-0.46775	-0.452489	0.0368291	0.738374	-1.72279	-0.52083	1.20196		0	67.232	470800000	49	15	15	15	640	640	73.667	35.6	1.03938	-1.20196	-1.95619	N1LMJ1	N1LMJ1	>tr|N1LMJ1|N1LMJ1_9BACI Threonine--tRNA ligase OS=Bacillus sp. GeD10 GN=thrS PE=3 SV=1	N1LMJ1		Threonine--tRNA ligase	>tr|N1LMJ1|N1LMJ1_9BACI Threonine--tRNA ligase OS=Bacillus sp. GeD10	thrS
xenobiotics biodegradation and metabolism	N1LT34		bged01459	Cytidine deaminase	EBGED10_51250	K01489		-0.643428	1.03877	0.0914596		0	2.86801	2.62492	2.81089	1.59137	2.80347	2.38503	1.0622	1.93334	1.8151	2.28587	2.53973	1.89631	-0.643428		0	287.18	8686100000	157	10	10	10	132	132	14.366	85.6	1.03877	0.643428	1.91756	N1LT34	N1LT34	>tr|N1LT34|N1LT34_9BACI Cytidine deaminase OS=Bacillus sp. GeD10 GN=EBGED10_51250 PE=4 SV=1	N1LT34		Cytidine deaminase	>tr|N1LT34|N1LT34_9BACI Cytidine deaminase OS=Bacillus sp. GeD10	EBGED10_51250
#N/A	N1LUA2		#N/A	ESAT-6-like protein	EBGED10_35520	#N/A		-1.49557	1.03729	0.0917727		0	-0.372605	1.6861	0.437315	0.614498	0.449875	-3.13879	-1.00015	0.912953	-1.62844	0.191743	0.563036	-0.932537	-1.49557		0	217.6	2685700000	35	2	2	4	98	98	11.193	37.8	1.03729	1.49557	1.91534	N1LUA2	N1LUA2	>tr|N1LUA2|N1LUA2_9BACI ESAT-6-like protein OS=Bacillus sp. GeD10 GN=EBGED10_35520 PE=3 SV=1	N1LUA2		ESAT-6-like protein	>tr|N1LUA2|N1LUA2_9BACI ESAT-6-like protein OS=Bacillus sp. GeD10	EBGED10_35520
#N/A	N1M124		bged01739	Oligopeptide transport ATP-binding protein OppF (TC 3.A.1.5.1)	EBGED10_59370	K10823		0.417628	1.03712	0.0918085		0	1.75144	1.66615	1.51858	2.07814	1.81398	1.50852	2.17818	2.73287	2.33245	2.16442	1.76566	2.18329	0.417628		0	323.31	5848200000	225	16	16	17	311	311	35.258	71.4	1.03712	-0.417628	-1.91509	N1M124	N1M124	>tr|N1M124|N1M124_9BACI Oligopeptide transport ATP-binding protein OppF (TC 3.A.1.5.1) OS=Bacillus sp. GeD10 GN=EBGED10_59370 PE=3 SV=1	N1M124		Oligopeptide transport ATP-binding protein OppF (TC 3.A.1.5.1)	>tr|N1M124|N1M124_9BACI Oligopeptide transport ATP-binding protein OppF (TC 3.A.1.5.1) OS=Bacillus sp. GeD10	EBGED10_59370
#N/A	N1LKQ7		bged02208	Response regulator LiaR	EBGED10_2010	K11618		0.426977	1.0347	0.0923214		0	-2.18033	-2.24703	NaN	-2.40372	-1.83903	NaN	-1.73432	-2.19386	-1.32881	-1.70521	-2.16753	-1.74055	0.426977		0	32.116	563020000	29	5	5	5	210	210	23.63	40.5	1.0347	-0.426977	-2.00082	N1LKQ7	N1LKQ7	>tr|N1LKQ7|N1LKQ7_9BACI Response regulator LiaR OS=Bacillus sp. GeD10 GN=EBGED10_2010 PE=4 SV=1	N1LKQ7		Response regulator LiaR	>tr|N1LKQ7|N1LKQ7_9BACI Response regulator LiaR OS=Bacillus sp. GeD10	EBGED10_2010
#N/A	N1LPM3		bged00180	Pseudouridine synthase	EBGED10_39050	K06178		0.653114	1.03423	0.0924213		0	0.54112	0.958298	0.563346	0.893455	1.32073	2.45127	0.709939	1.59063	1.82261	0.968064	0.855389	1.5085	0.653114		0	275.94	3210800000	165	12	12	12	242	242	27.526	56.2	1.03423	-0.653114	-1.91077	N1LPM3	N1LPM3	>tr|N1LPM3|N1LPM3_9BACI Pseudouridine synthase OS=Bacillus sp. GeD10 GN=EBGED10_39050 PE=3 SV=1	N1LPM3		Pseudouridine synthase	>tr|N1LPM3|N1LPM3_9BACI Pseudouridine synthase OS=Bacillus sp. GeD10	EBGED10_39050
#N/A	N1LR48		bged00988	2-dehydropantoate 2-reductase	EBGED10_39210	K00077		0.77271	1.033	0.0926821		0	-3.14662	-3.30463	-3.66157	-2.71231	-2.83781	-3.72223	-2.49057	-1.66798	-1.83453	-2.08408	-3.13259	-2.35988	0.77271		0	33.991	293030000	17	5	5	5	314	314	35.274	20.1	1.033	-0.77271	-1.90894	N1LR48	N1LR48	>tr|N1LR48|N1LR48_9BACI 2-dehydropantoate 2-reductase OS=Bacillus sp. GeD10 GN=EBGED10_39210 PE=3 SV=1	N1LR48		2-dehydropantoate 2-reductase	>tr|N1LR48|N1LR48_9BACI 2-dehydropantoate 2-reductase OS=Bacillus sp. GeD10	EBGED10_39210
#N/A	N1LZA1		bged02010	Uncharacterized protein conserved in bacteria	EBGED10_53170	#N/A		0.683773	1.03249	0.0927911		0	-0.733744	0.0908946	-0.173108	0.218637	0.357054	-0.356134	0.282203	0.888807	1.01094	1.35278	-0.0480535	0.63572	0.683773		0	125.49	3244300000	111	11	11	11	215	215	24.094	65.1	1.03249	-0.683773	-1.90818	N1LZA1	N1LZA1	>tr|N1LZA1|N1LZA1_9BACI Uncharacterized protein conserved in bacteria OS=Bacillus sp. GeD10 GN=EBGED10_53170 PE=4 SV=1	N1LZA1		Uncharacterized protein conserved in bacteria	>tr|N1LZA1|N1LZA1_9BACI Uncharacterized protein conserved in bacteria OS=Bacillus sp. GeD10	EBGED10_53170
#N/A	N1LSM3		bged03283	Putative phosphoesterase EBGED10	EBGED10_29620	K01975		-0.451363	1.0322	0.0928541		0	3.71873	4.12124	4.30154	4.6298	4.66955	3.39357	4.2637	3.97638	3.99804	3.55235	4.28817	3.83681	-0.451363		0	323.31	32720000000	410	15	15	15	172	172	19.783	89	1.0322	0.451363	1.90774	N1LSM3	N1LSM3	>tr|N1LSM3|N1LSM3_9BACI Putative phosphoesterase EBGED10_29620 OS=Bacillus sp. GeD10 GN=EBGED10_29620 PE=3 SV=1	N1LSM3		Putative phosphoesterase EBGED10	>tr|N1LSM3|N1LSM3_9BACI Putative phosphoesterase EBGED10_29620 OS=Bacillus sp. GeD10	EBGED10_29620
#N/A	N1LRE7		bged00612	Glycerol kinase	glpK	K00864		0.857814	1.03142	0.0930212		0	0.748306	0.391448	1.30041	1.10379	1.20514	0.155799	2.04251	2.21475	2.20055	2.42456	0.949819	1.80763	0.857814		0	323.31	4008700000	180	24	24	24	496	496	55.144	61.7	1.03142	-0.857814	-1.90657	N1LRE7	N1LRE7	>tr|N1LRE7|N1LRE7_9BACI Glycerol kinase OS=Bacillus sp. GeD10 GN=glpK PE=3 SV=1	N1LRE7		Glycerol kinase	>tr|N1LRE7|N1LRE7_9BACI Glycerol kinase OS=Bacillus sp. GeD10	glpK
#N/A	N1LWQ8		#N/A	Uncharacterized protein, homolog of B.subtilis yhgC	EBGED10_44020	K07145		-0.433626	1.02761	0.093841		0	0.942011	1.75223	1.82597	1.70828	2.1326	1.00431	1.15543	1.19833	1.67905	1.15584	1.67222	1.23859	-0.433626		0	323.31	5235600000	189	8	8	8	165	165	18.967	74.5	1.02761	0.433626	1.90088	N1LWQ8	N1LWQ8	>tr|N1LWQ8|N1LWQ8_9BACI Uncharacterized protein, homolog of B.subtilis yhgC OS=Bacillus sp. GeD10 GN=EBGED10_44020 PE=4 SV=1	N1LWQ8		Uncharacterized protein, homolog of B.subtilis yhgC	>tr|N1LWQ8|N1LWQ8_9BACI Uncharacterized protein, homolog of B.subtilis yhgC OS=Bacillus sp. GeD10	EBGED10_44020
#N/A	N1LPY4		#N/A	Uncharacterized protein	EBGED10_33840	#N/A		1.75378	1.01949	0.0956124		0	-3.02924	-2.72947	NaN	-1.38364	-3.70193	NaN	-1.51953	-0.39506	NaN	NaN	-2.71107	-0.957295	1.75378		0.00096015	2.8625	953390000	21	2	2	2	107	107	10.983	7.5	1.01949	-1.75378	-2.17185	N1LPY4	N1LPY4	>tr|N1LPY4|N1LPY4_9BACI Uncharacterized protein OS=Bacillus sp. GeD10 GN=EBGED10_33840 PE=4 SV=1	N1LPY4		Uncharacterized protein	>tr|N1LPY4|N1LPY4_9BACI Uncharacterized protein OS=Bacillus sp. GeD10	EBGED10_33840
#N/A	N1LSU9		bged01147	ATP synthase subunit alpha	atpA	K02111		0.456143	1.01823	0.0958895		0	3.81322	4.15423	4.59471	4.32259	4.44084	3.93147	4.78396	5.02377	4.94301	4.9241	4.26512	4.72126	0.456143		0	323.31	30480000000	733	30	30	30	502	502	54.643	60	1.01823	-0.456143	-1.88685	N1LSU9	N1LSU9	>tr|N1LSU9|N1LSU9_9BACI ATP synthase subunit alpha OS=Bacillus sp. GeD10 GN=atpA PE=3 SV=1	N1LSU9		ATP synthase subunit alpha	>tr|N1LSU9|N1LSU9_9BACI ATP synthase subunit alpha OS=Bacillus sp. GeD10	atpA
#N/A	N1LMM5		bged01337	Pyridoxal 5-phosphate synthase subunit PdxT	pdxT	K08681		-0.55817	1.01584	0.0964189		0	2.14706	1.74872	1.6869	2.45831	2.71299	0.718049	1.73942	1.81096	1.79504	1.89966	2.1508	1.59263	-0.55817		0	207.16	7009500000	260	13	13	13	196	196	21.56	63.3	1.01584	0.55817	1.88327	N1LMM5	N1LMM5	>tr|N1LMM5|N1LMM5_9BACI Pyridoxal 5-phosphate synthase subunit PdxT OS=Bacillus sp. GeD10 GN=pdxT PE=3 SV=1	N1LMM5		Pyridoxal 5-phosphate synthase subunit PdxT	>tr|N1LMM5|N1LMM5_9BACI Pyridoxal 5-phosphate synthase subunit PdxT OS=Bacillus sp. GeD10	pdxT
#N/A	N1LTD6		bged01306	Ribosomal RNA small subunit methyltransferase E	EBGED10_46290	K09761		-0.583048	1.01072	0.0975616		0	0.370771	-0.55188	-0.908446	0.582072	-0.0373662	-0.538138	-1.0914	-0.832887	-0.729953	-0.267715	-0.10897	-0.692018	-0.583048		0	140.78	1354800000	62	6	6	6	249	249	27.611	31.7	1.01072	0.583048	1.87561	N1LTD6	N1LTD6	>tr|N1LTD6|N1LTD6_9BACI Ribosomal RNA small subunit methyltransferase E OS=Bacillus sp. GeD10 GN=EBGED10_46290 PE=3 SV=1	N1LTD6		Ribosomal RNA small subunit methyltransferase E	>tr|N1LTD6|N1LTD6_9BACI Ribosomal RNA small subunit methyltransferase E OS=Bacillus sp. GeD10	EBGED10_46290
#N/A	N1M072		bged02649	Phosphate acyltransferase	plsX	K03621		0.753375	1.00896	0.0979576		0	-0.223271	-2.01822	-1.27449	-1.0887	-1.20922	-1.33568	0.203582	0.142907	-0.659117	-0.398716	-1.16278	-0.409405	0.753375		0	57.807	1200800000	66	11	11	11	330	330	35.422	39.7	1.00896	-0.753376	-1.87298	N1M072	N1M072	>tr|N1M072|N1M072_9BACI Phosphate acyltransferase OS=Bacillus sp. GeD10 GN=plsX PE=3 SV=1	N1M072		Phosphate acyltransferase	>tr|N1M072|N1M072_9BACI Phosphate acyltransferase OS=Bacillus sp. GeD10	plsX
[truncated: 1,529 more rows]
[truncated: 1 more columns]

## Sheet: KEGG blast
Output from BLAST search of all proteins of Bacillus sp. GeD10 against all KO-annotated proteins found in the Uniprot database.
[truncated: 6,154 more rows]
